# Supplementary material for: Proline sulphonamide-catalysed Yamada–Otani condensation: reaction development, substrate scope and scaffold reactivity
Source: Royal Society of Chemistry journal article supplement (doi:10.1039/c2ob25400j), 2012-01-01

## **Proline Sulphonamide-Catalysed Yamada-Otani Condensation: Reaction Development, Substrate Scope and Scaffold Reactivity**

Hua Yang,<sup>a</sup> Somdev Banerjee<sup>b</sup> and Rich G. Carter<sup>b\*</sup>

<sup>a</sup> *College of Chemistry & Chemical Engineering, Central South University, Changsha, Hunan 410083, China.* <sup>b</sup> *Chemistry Department, Oregon State University, Corvallis, OR 97331.*

---

**Electronic Supplementary Information: NMR Spectra**

---

# Proline Sulphonamide-Catalysed Yamada-Otani Condensation: Reaction Development, Substrate Scope and Scaffold Reactivity

## Table of Contents

| Compound # | Page Number |
|------------|-------------|
| <b>36</b>  | S3          |
| <b>38</b>  | S5          |
| <b>39</b>  | S7          |
| <b>42i</b> | S9          |
| <b>42k</b> | S11         |
| <b>42l</b> | S13         |
| <b>42n</b> | S15         |
| <b>42o</b> | S17         |
| <b>56</b>  | S19         |
| <b>42q</b> | S21         |
| <b>42r</b> | S23         |
| <b>59</b>  | S25         |
| <b>42p</b> | S27         |
| <b>23</b>  | S29         |
| <b>41a</b> | S31         |
| <b>41b</b> | S33         |
| <b>41c</b> | S35         |
| <b>43a</b> | S37         |
| <b>43b</b> | S39         |
| <b>43c</b> | S41         |

| Compound # | Page Number |
|------------|-------------|
| <b>43e</b> | S45         |
| <b>43f</b> | S47         |
| <b>43g</b> | S49         |
| <b>43h</b> | S51         |
| <b>43i</b> | S53         |
| <b>43j</b> | S55         |
| <b>43k</b> | S57         |
| <b>43l</b> | S59         |
| <b>43m</b> | S61         |
| <b>43n</b> | S63         |
| <b>43o</b> | S65         |
| <b>43p</b> | S67         |
| <b>43q</b> | S69         |
| <b>43r</b> | S71         |
| <b>44</b>  | S73         |
| <b>45</b>  | S75         |
| <b>46</b>  | S77         |
| <b>47</b>  | S79         |
| <b>48</b>  | S81         |
| <b>49</b>  | S83         |

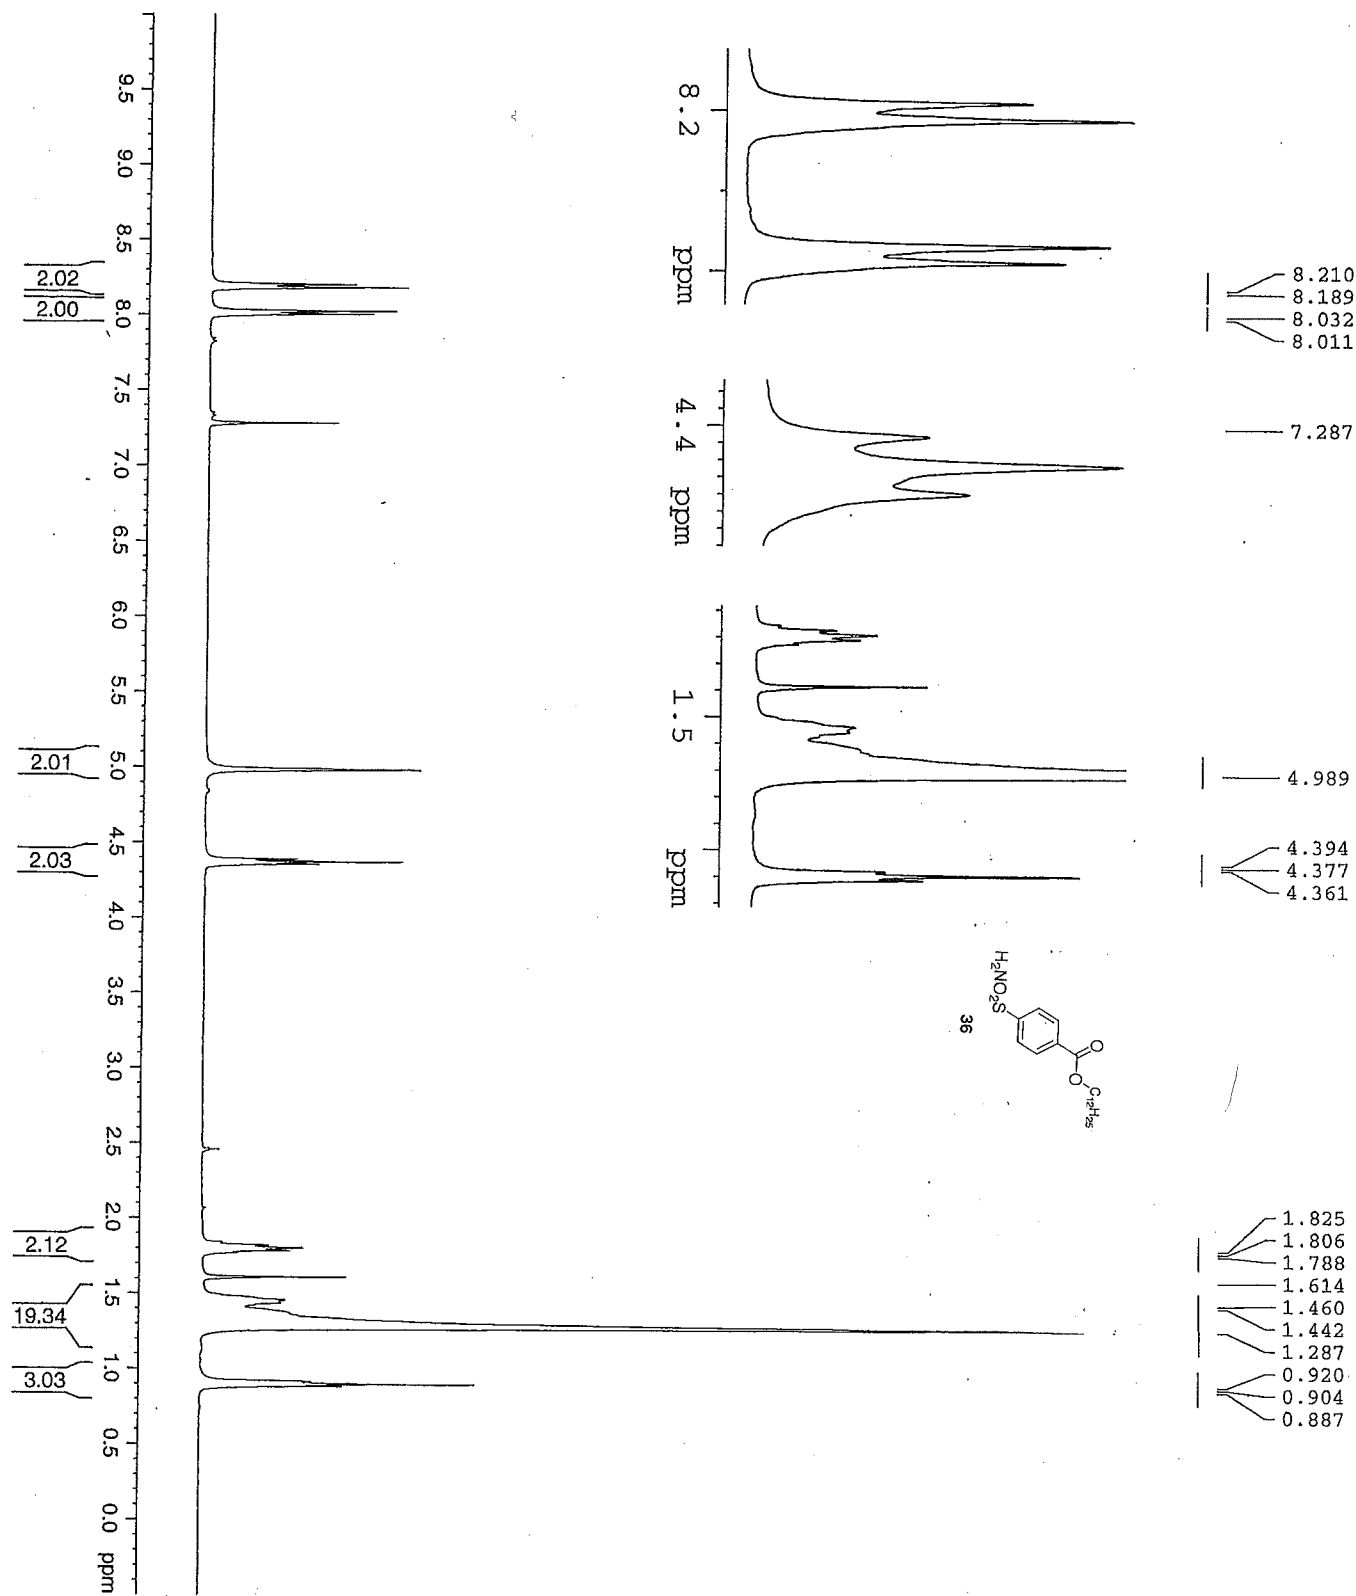

Current Data Parameters  
NAME 7668  
EXNO 1  
PROCNO 1  
PU 1  
DT /h  
USER yang

F2 - Acquisition Parameters  
Date\_ 20080825  
Time 16.08  
INSTRUM DFX400  
PROBHD 5 mm BBO BB-1H  
PULPROG zgpg30  
TD 32768  
SOLVENT CDCl3  
NS 2  
DS 2  
SWH 6410.256 Hz  
FIDRES 0.195623 Hz  
AQ 2.5539540 sec  
RG 512  
DW 78.000 usec  
DE 6.00 usec  
TE 298.2 K  
D1 2.00000000 sec  
TD0 1

==== CHANNEL f1 =====  
NUC1 1H  
P1 14.70 usec  
PL1 0.00 dB  
SFO1 399.9528000 MHz

F2 - Processing parameters  
SI 32768  
SF 399.9500000 MHz  
WDW EM  
SSB 0  
GB 0  
PC 1.00

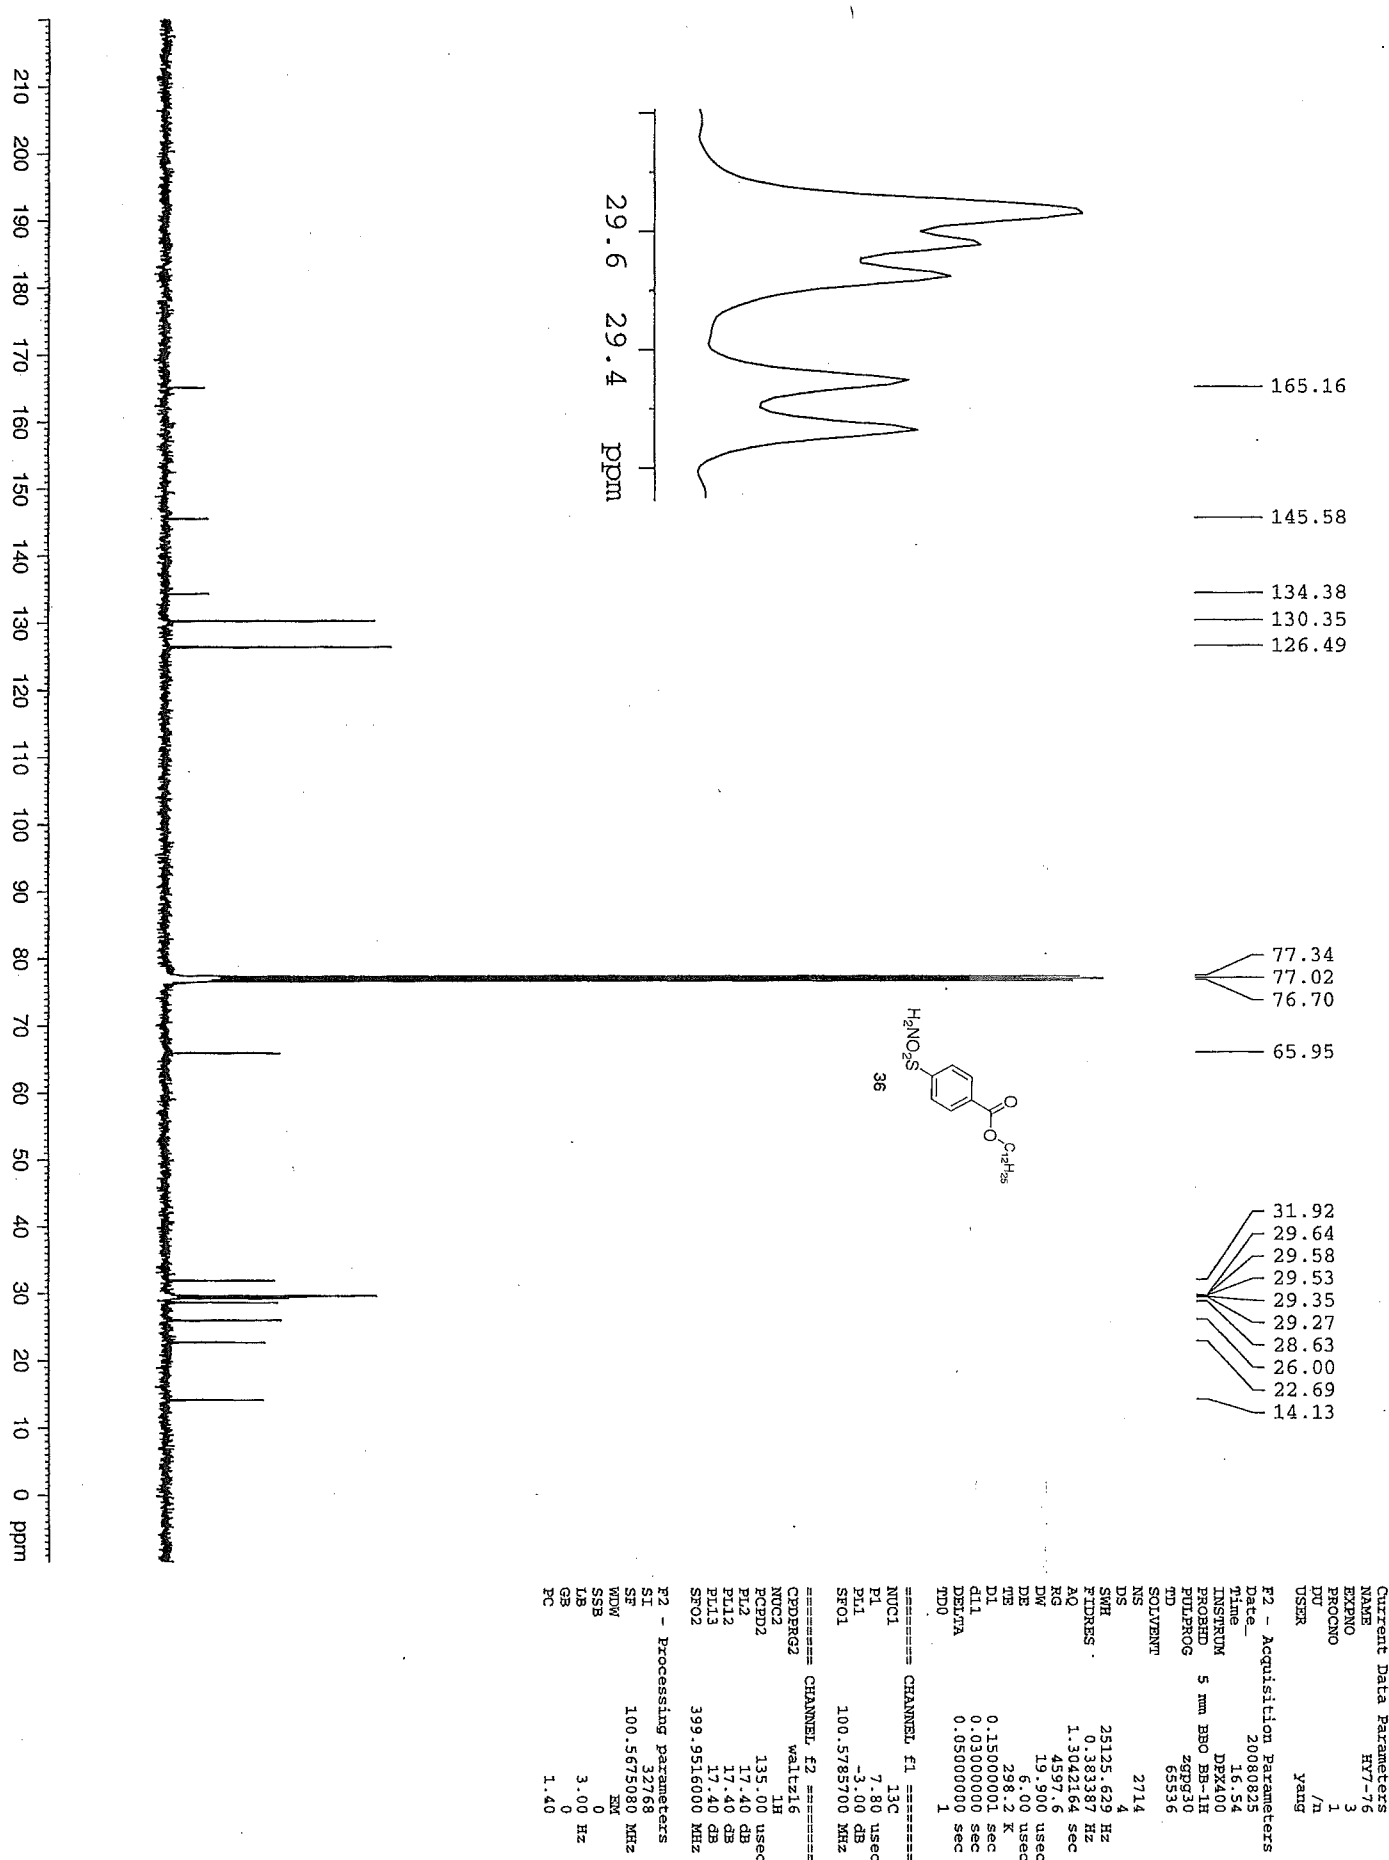

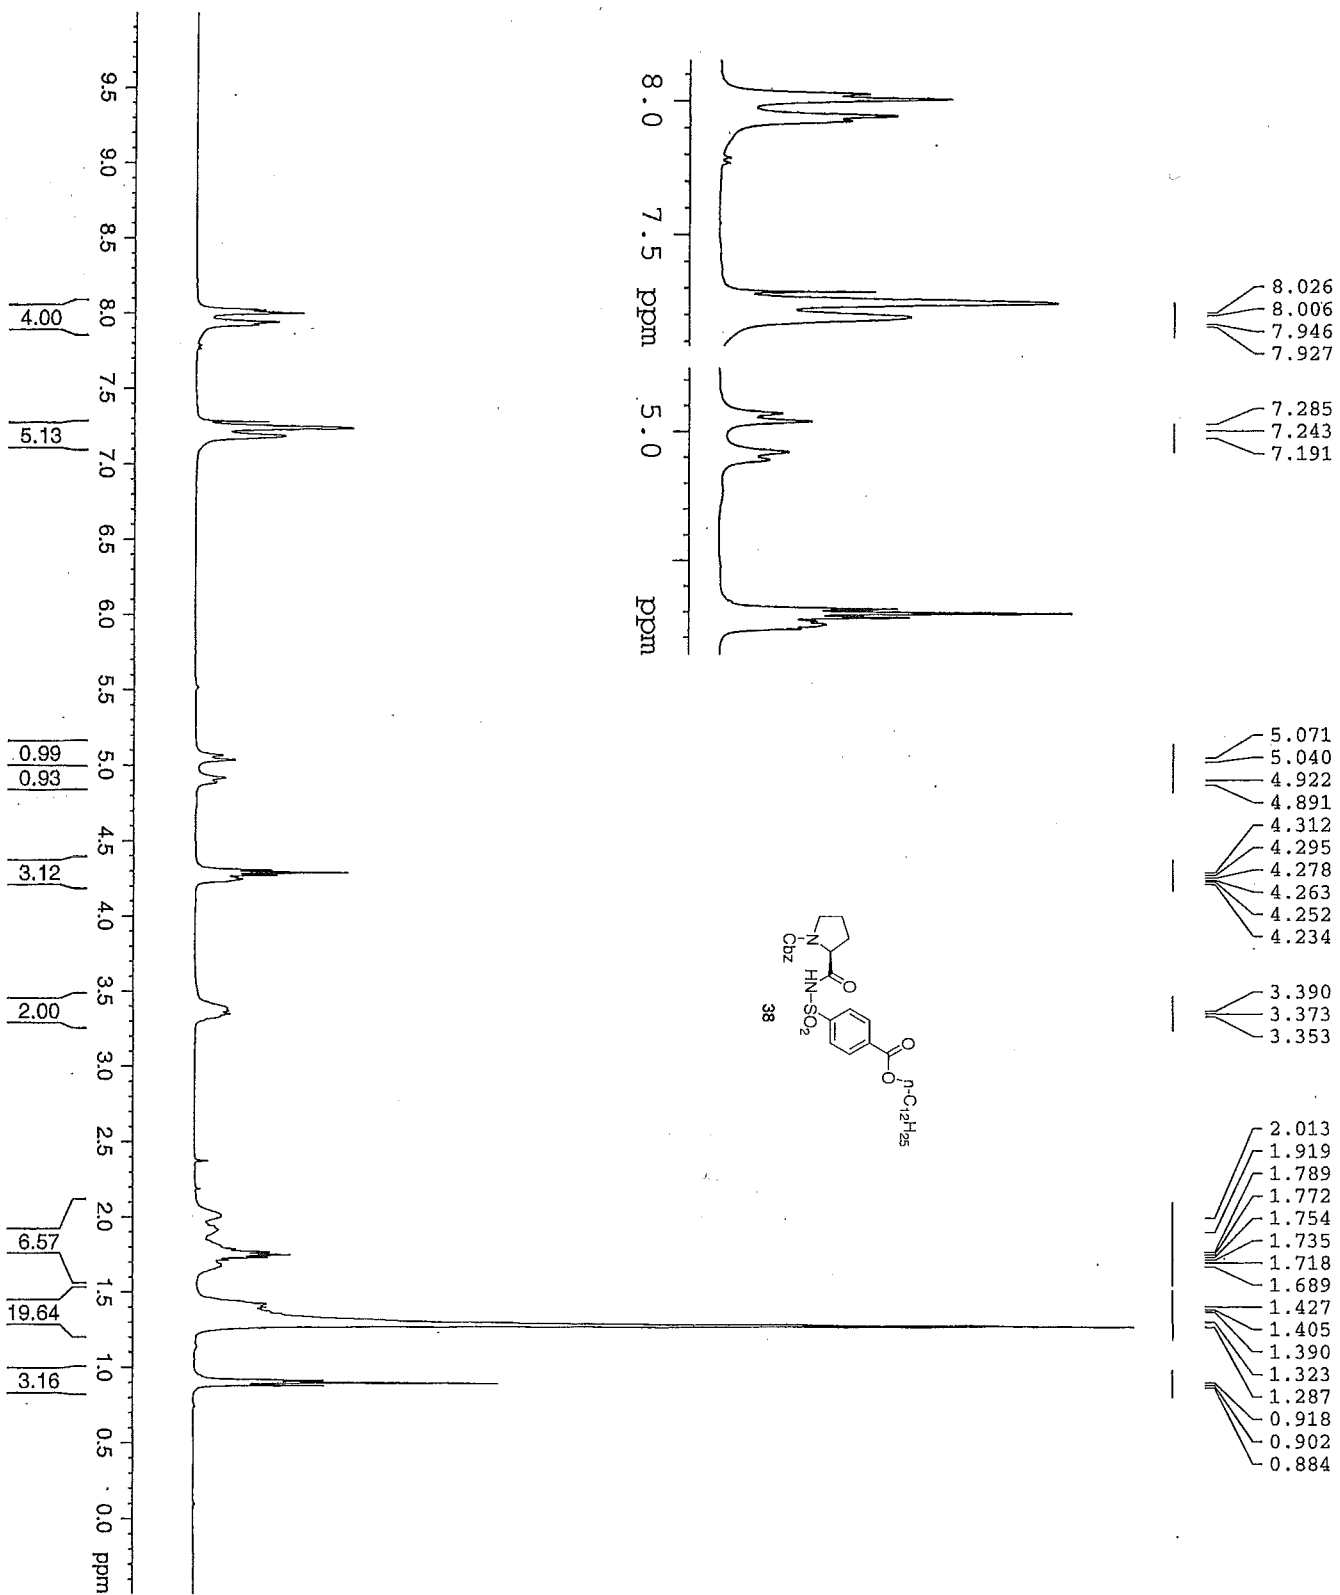

Current Data Parameters  
NAME Hyt-77  
EXPNO 3  
PROCNO 1  
F2 USER yang  
F2 - Acquisition Parameters  
Date\_ 20080904  
Time 16.12  
INSTRUM DPX400  
PROBHD 5 mm BBO BB-1H  
PULPROG zgpg30  
TD 32768  
SOLVENT CDCl3  
NS 32  
DS 2  
SWH 6410.256 Hz  
FIDRES 0.195625 Hz  
AQ 2.5559540 sec  
RG 114  
RG 114  
DW 78.000 usec  
DE 6.00 usec  
TE 298.2 K  
D1 2.00000000 sec  
TD0 1  
===== CHANNEL f1 =====  
NUC1 1H  
P1 14.70 usec  
PL 0.00 dB  
SFO1 399.9528000 MHz  
F2 - Processing parameters  
SI 32768  
SF 399.9500000 MHz  
WDW EM  
SSB 0  
LB 0.70 Hz  
GB 0  
PC 1.00

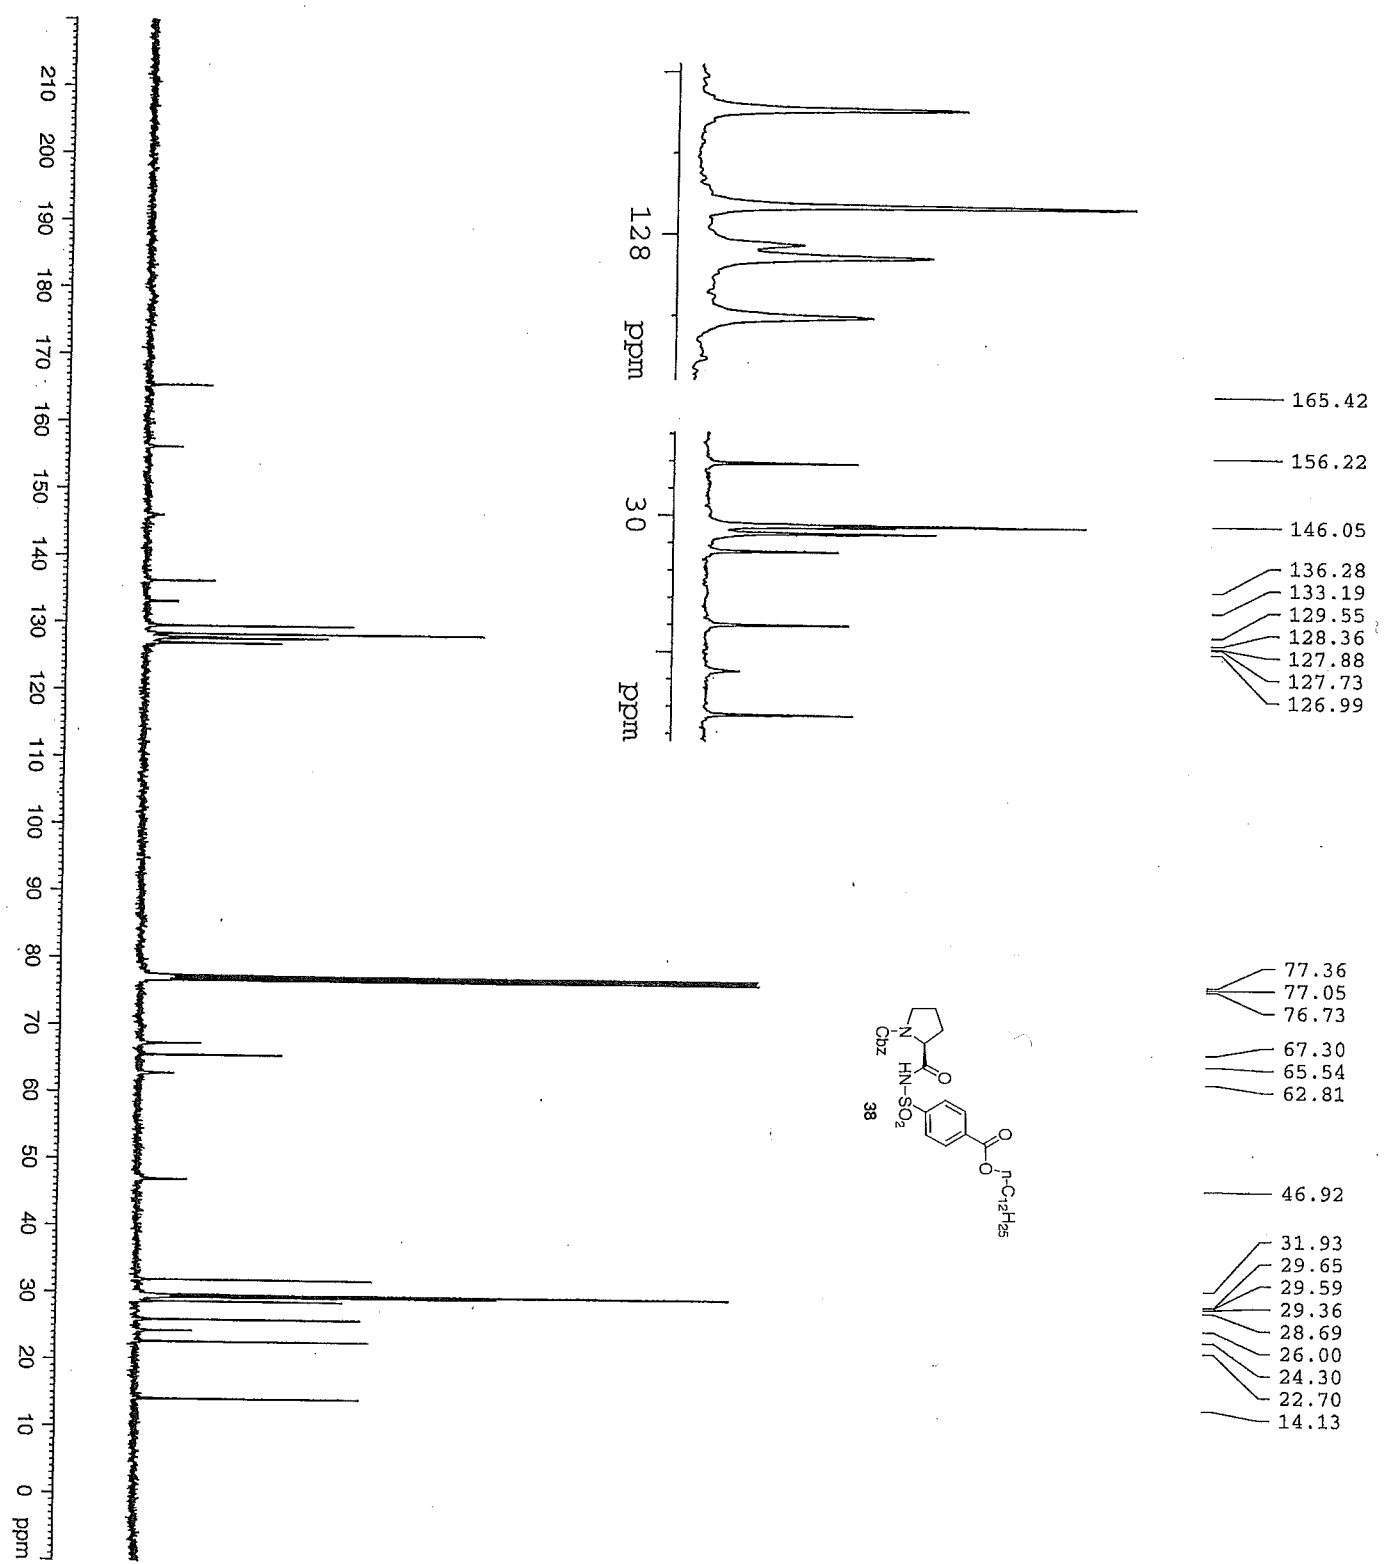

Current Data Parameters  
NAME HY-77  
EXPNO 5  
PROCNO 1  
DU /h  
USER Yang

F2 - Acquisition Parameters  
Date\_ 20080904  
Time 16.50  
INSTRUM dpx400  
PROBHD 5 mm HBD BB-1H  
PULPROG zgpg30  
TD 65536  
SOLVENT NS  
DS 4  
SWH 25125.629 Hz  
FIDRES 0.383897 Hz  
AQ 1.3042164 sec  
RG 1.3042164 sec  
RW 19.900 usec  
DE 6.00 usec  
TE 298.2 K  
D1 0.15000001 sec  
d11 0.03000000 sec  
DELTA 0.05000000 sec  
FDO 1

===== CHANNEL f1 =====  
NUC1 13C  
P1 7.80 usec  
PL1 -3.00 dB  
SFO1 100.5785700 MHz

===== CHANNEL f2 =====  
CPDPRG2 waltz16  
NUC2 1H  
PCPD2 135.00 usec  
PL2 17.40 dB  
PL12 17.40 dB  
PL13 17.40 dB  
SFO2 399.9516000 MHz

F2 - Processing parameters  
SI 32768  
SF 100.5675080 MHz  
WDW EM  
SSB 0  
LB 3.00 Hz  
GB 0  
PC 1.40

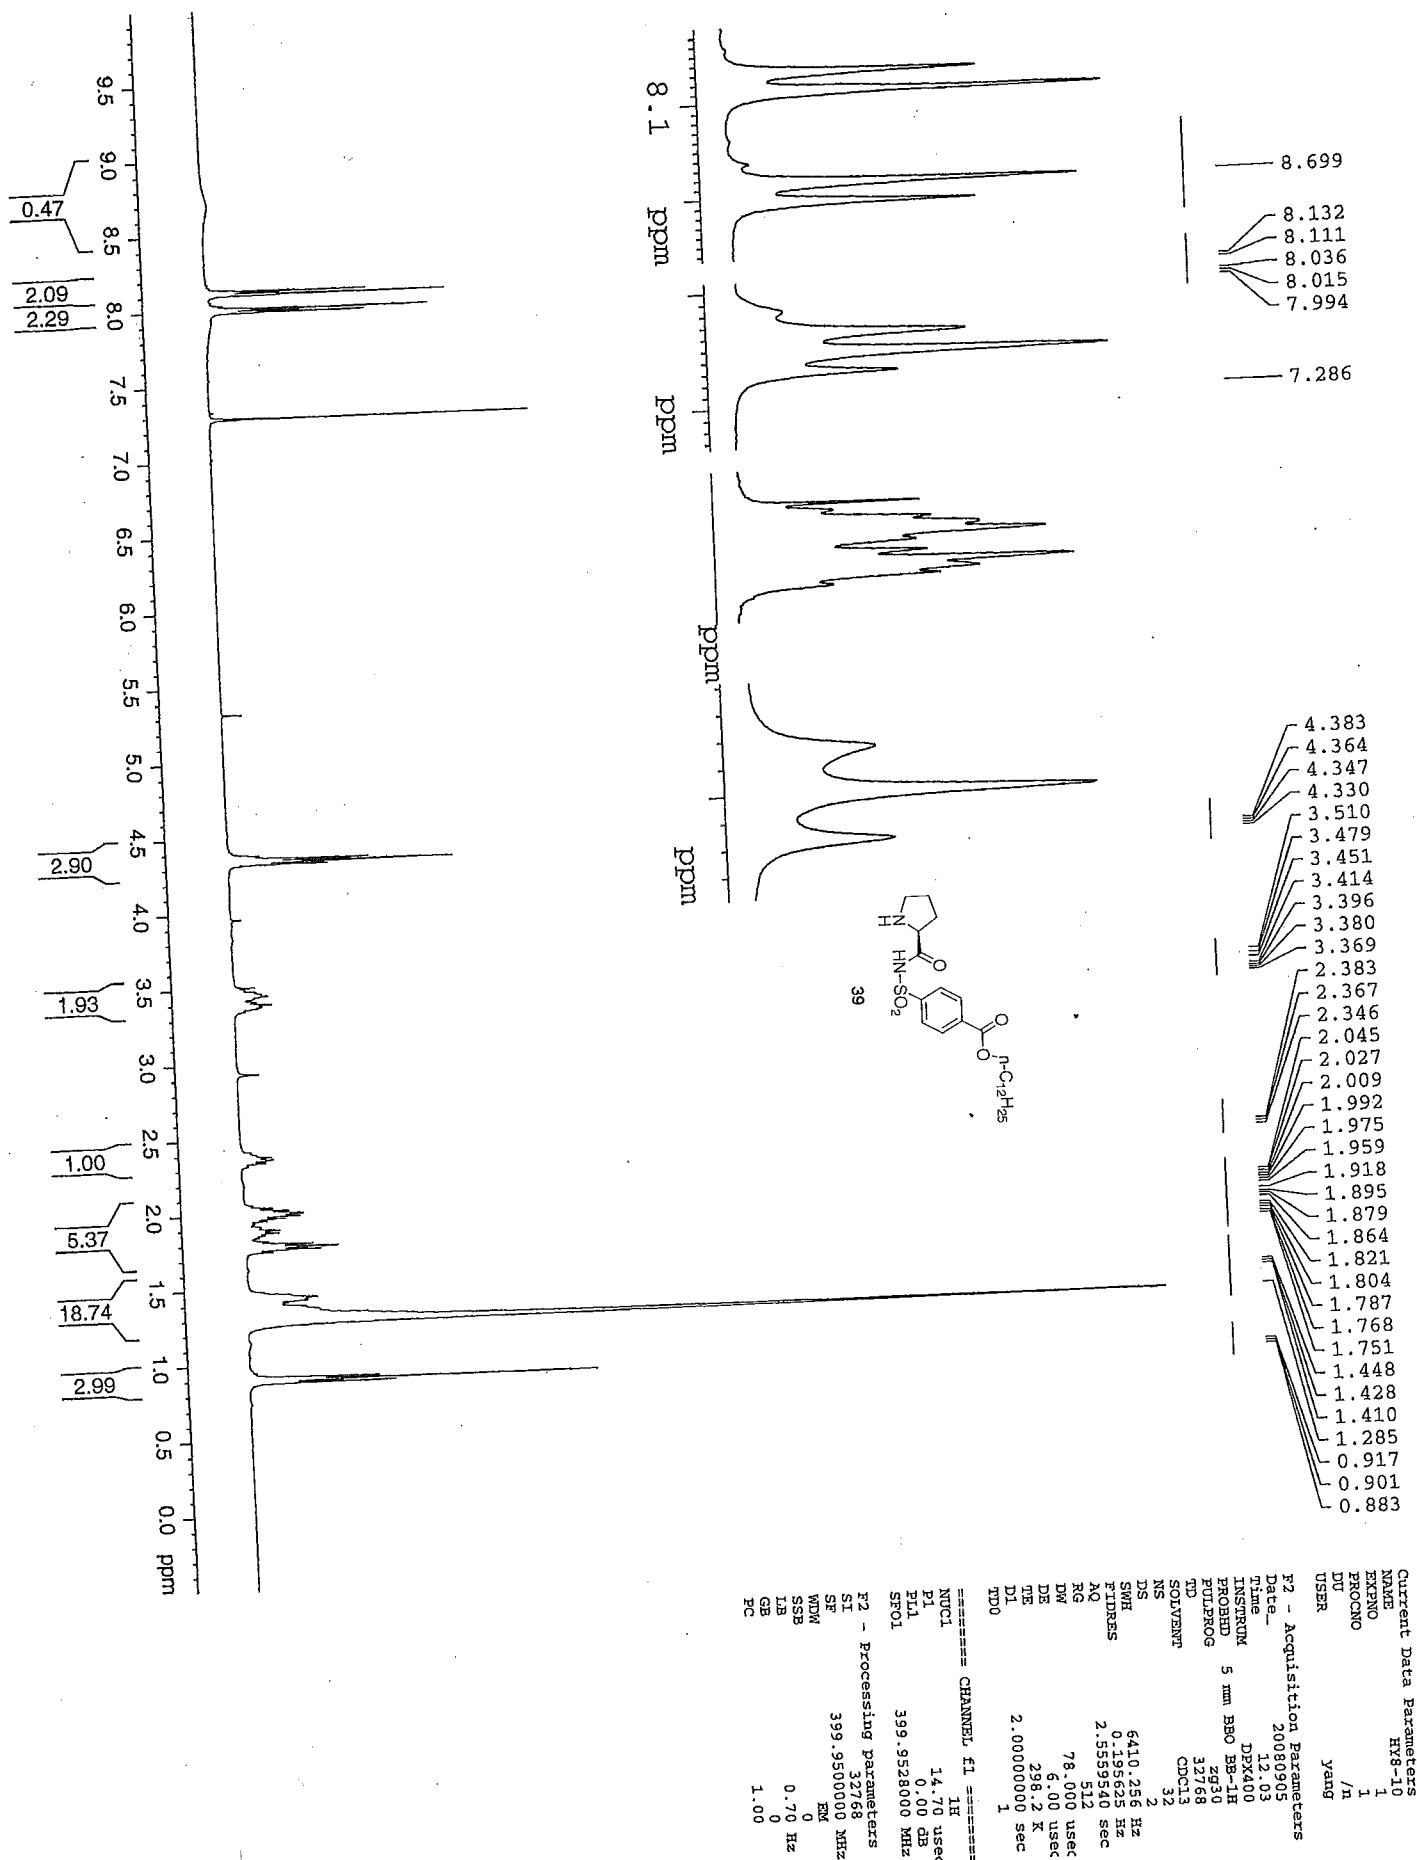

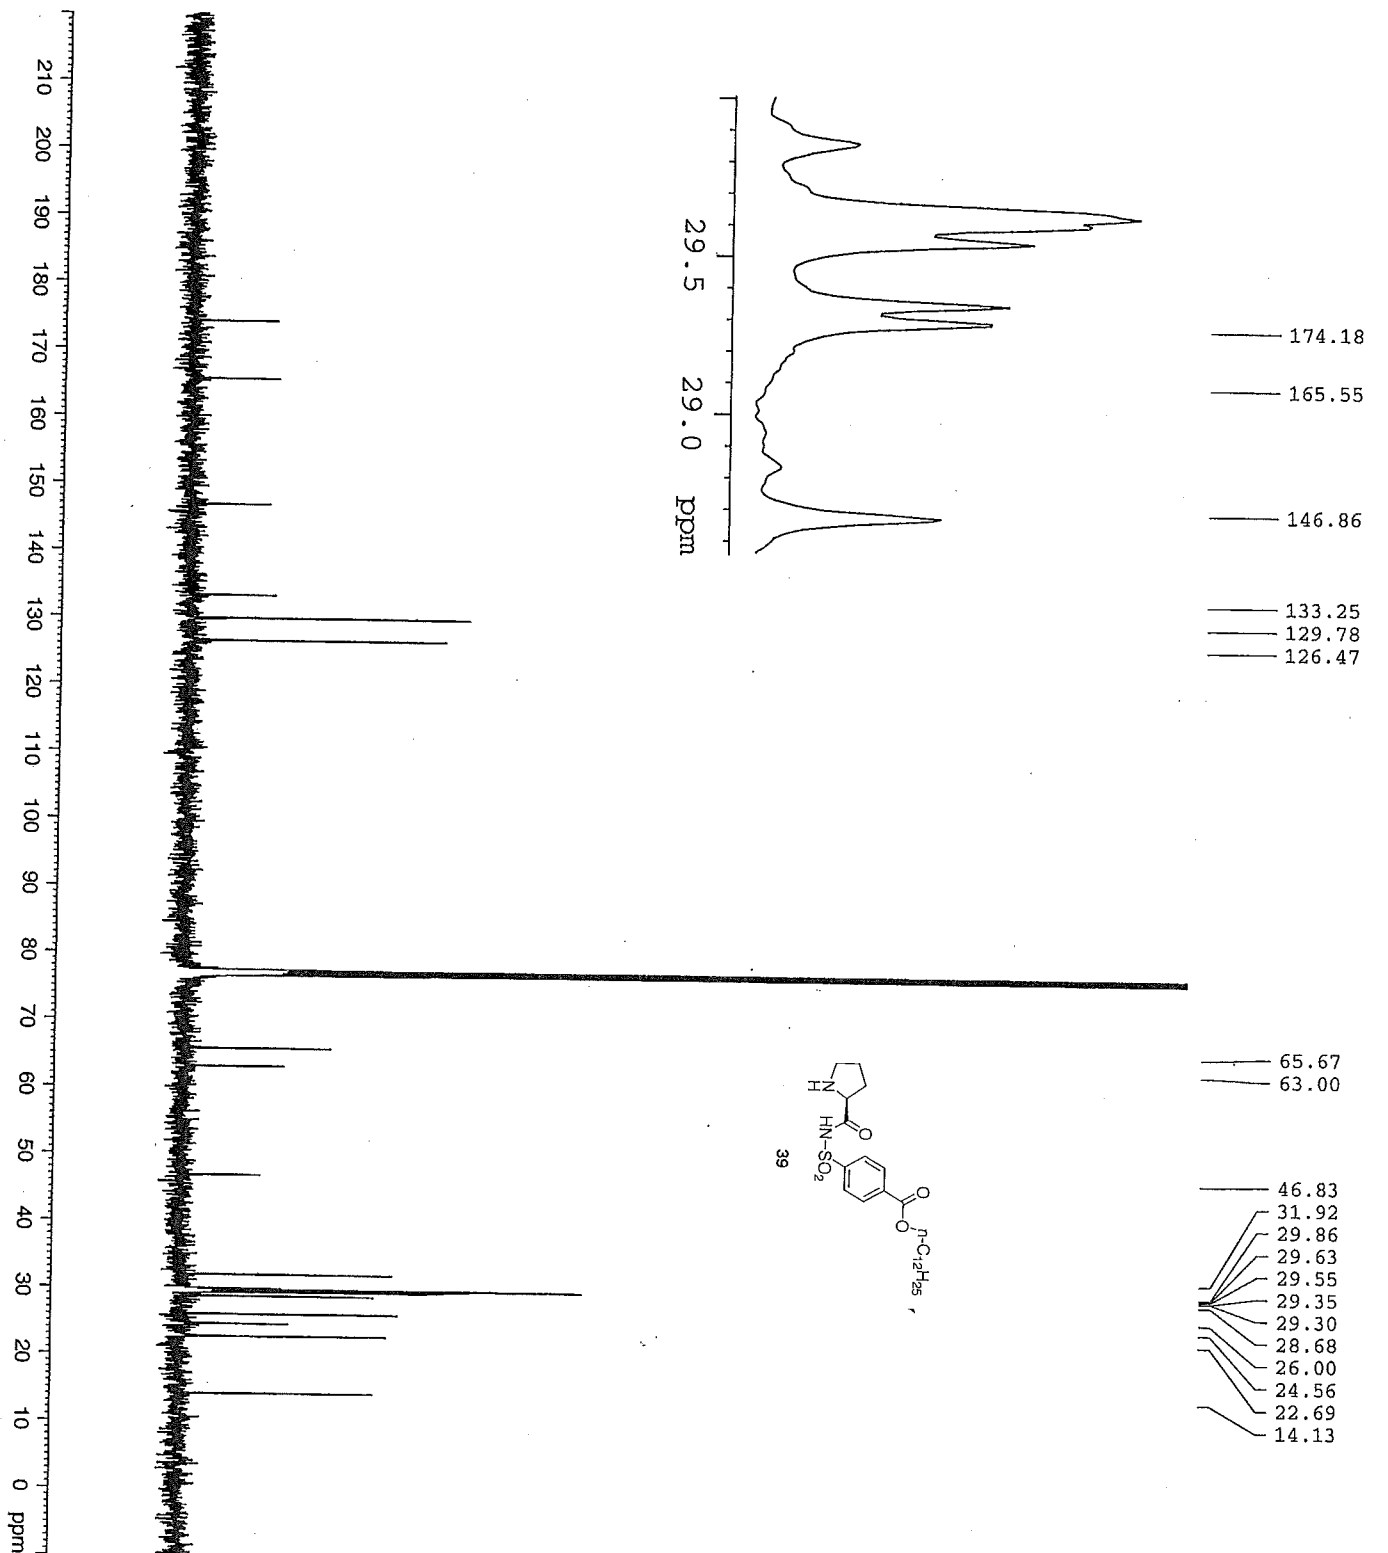

Current Data Parameters  
NAME HY8-10  
EXPNO 3  
PROCNO 1  
DU /n  
USSR Yang

F2 - Acquisition Parameters  
Date\_ 20080905  
Time 12.55  
INSTRUM DEX400  
PROBHD 5 mm BBO BB-1H  
PULPROG zgpg30  
TD 65536  
SOLVENT NS  
DS 1965  
SWH 25125.629 Hz  
FIDRES 0.383387 Hz  
AQ 1.3042164 sec  
RG 5792.6  
DW 19.900 usec  
DE 6.00 usec  
TE 298.2 K  
D1 0.15000001 sec  
d11 0.03000000 sec  
DELTA 0.05000000 sec  
TD0 1

===== CHANNEL f1 =====  
NUC1 13C  
P1 7.80 usec  
PL1 -3.00 dB  
SFO1 100.5785700 MHz

===== CHANNEL f2 =====  
CPDPRG2 waltz16  
NUC2 1H  
PCPD2 135.00 usec  
PL2 17.40 dB  
PL12 17.40 dB  
PL13 17.40 dB  
SFO2 399.9516000 MHz

F2 - Processing parameters  
SI 32768  
SF 100.5675080 MHz  
WDW EM  
SSB 0  
LB 3.00 Hz  
GB 0  
PC 1.40



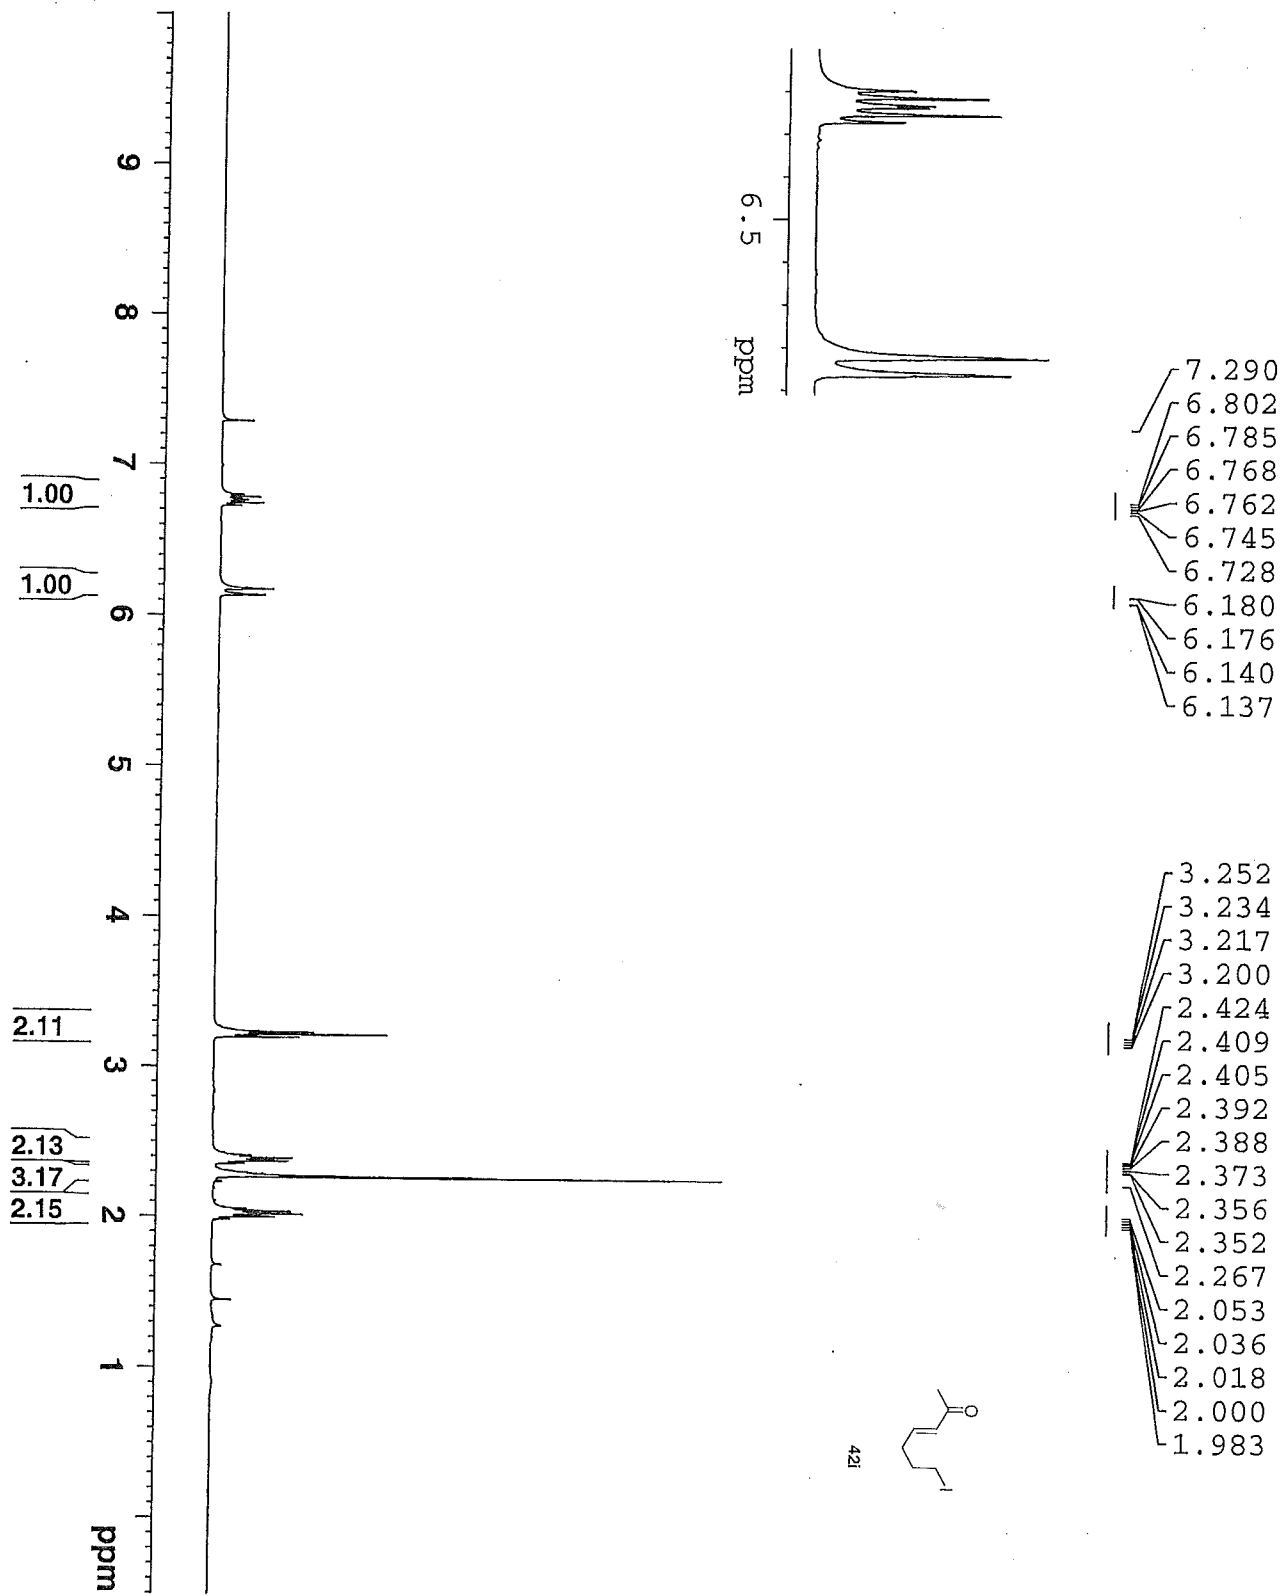

NAME HY15-24  
EXPNO 1  
PROCNO 1  
Date\_ 20100113  
Time 15.45  
INSTRUM spect  
PROBHD 5 mm PABBO BB-  
PULPROG zg30  
TD 32768  
SOLVENT CDCl3  
NS 32  
DS 2  
SWH 6410.256  
FIDRES 0.195625  
AQ 2.5559540  
RG 128  
DW 78.000  
DE 6.50  
TE 300.2  
D1 1.00000000  
TD0 1

==== CHANNEL f1 ====  
NUC1 1H  
P1 14.00  
PL1 0.00  
PL1W 10.27361584  
SFO1 400.1378009  
SI 32768  
SF 400.1350000  
WDW EM  
SSB 0  
LB 0.30  
GB 0  
PC 1.00

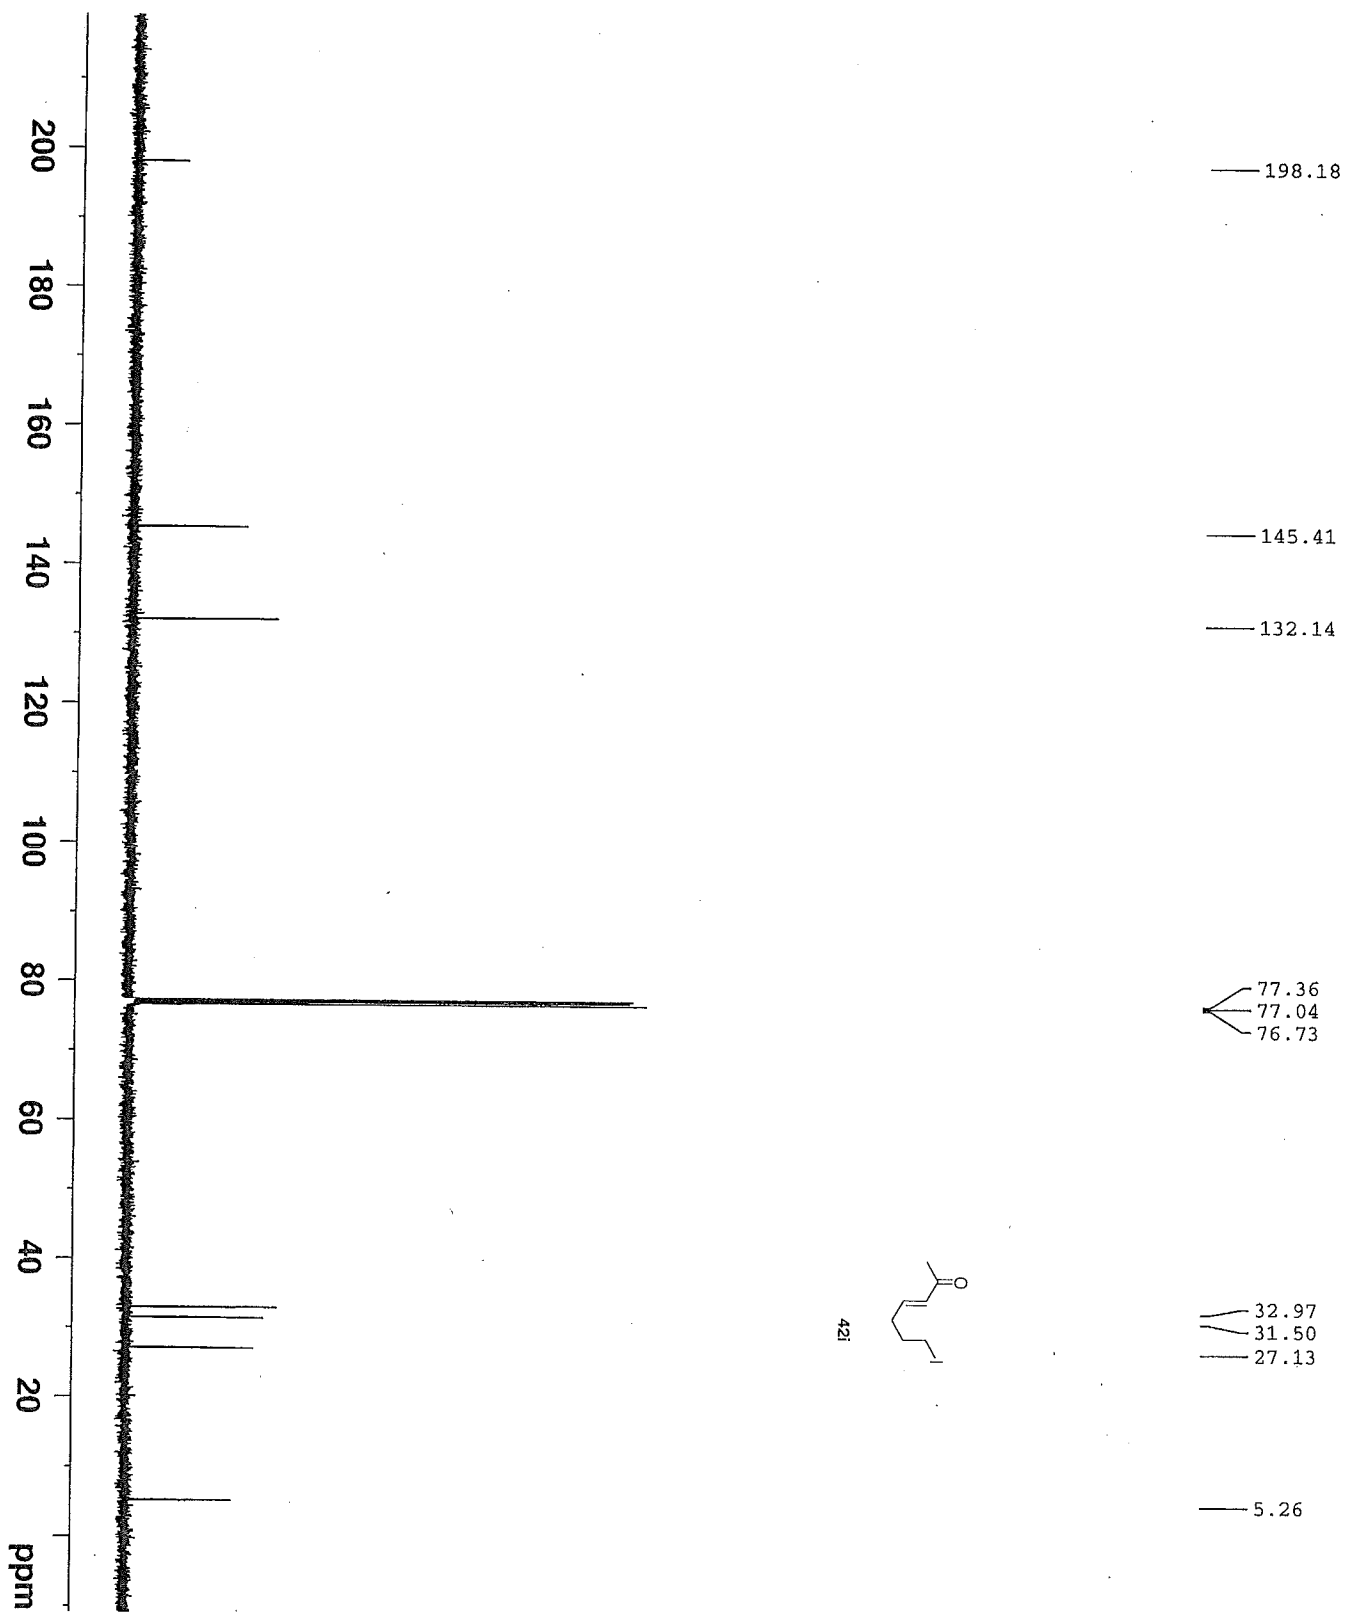

|         |                |
|---------|----------------|
| NAME    | HY15-24        |
| EXPNO   | 2              |
| PROCNO  | 1              |
| Date_   | 20100113       |
| Time    | 15.55          |
| INSTRUM | spect          |
| PROBHD  | 5 mm PABBO BB- |
| PULPROG | zgpg30         |
| TD      | 65536          |
| SOLVENT | CDCl3          |
| NS      | 149            |
| DS      | 4              |
| SWH     | 23980.814      |
| FIDRES  | 0.365918       |
| AQ      | 1.3664756      |
| RG      | 16384          |
| DW      | 20.850         |
| DE      | 6.50           |
| TE      | 301.4          |
| D1      | 2.00000000     |
| D11     | 0.03000000     |
| TD0     | 1              |

|                        |             |
|------------------------|-------------|
| ===== CHANNEL f1 ===== |             |
| NUC1                   | 13C         |
| P1                     | 9.00        |
| PL1                    | -2.00       |
| PL1W                   | 46.89702606 |
| SFO1                   | 100.6240872 |

|                        |             |
|------------------------|-------------|
| ===== CHANNEL f2 ===== |             |
| CPDPRG2                | waltz16     |
| NUC2                   | 1H          |
| PCPD2                  | 90.00       |
| PL2                    | 0.00        |
| PL12                   | 16.16       |
| PL13                   | 17.00       |
| PL12W                  | 10.27361584 |
| PL12W                  | 0.24872722  |
| PL13W                  | 0.20498557  |
| SFO2                   | 400.1366005 |
| SI                     | 32768       |
| SF                     | 100.6140260 |
| WDW                    | EM          |
| SSB                    | 0           |
| LB                     | 1.00        |
| GB                     | 0           |
| PC                     | 1.40        |

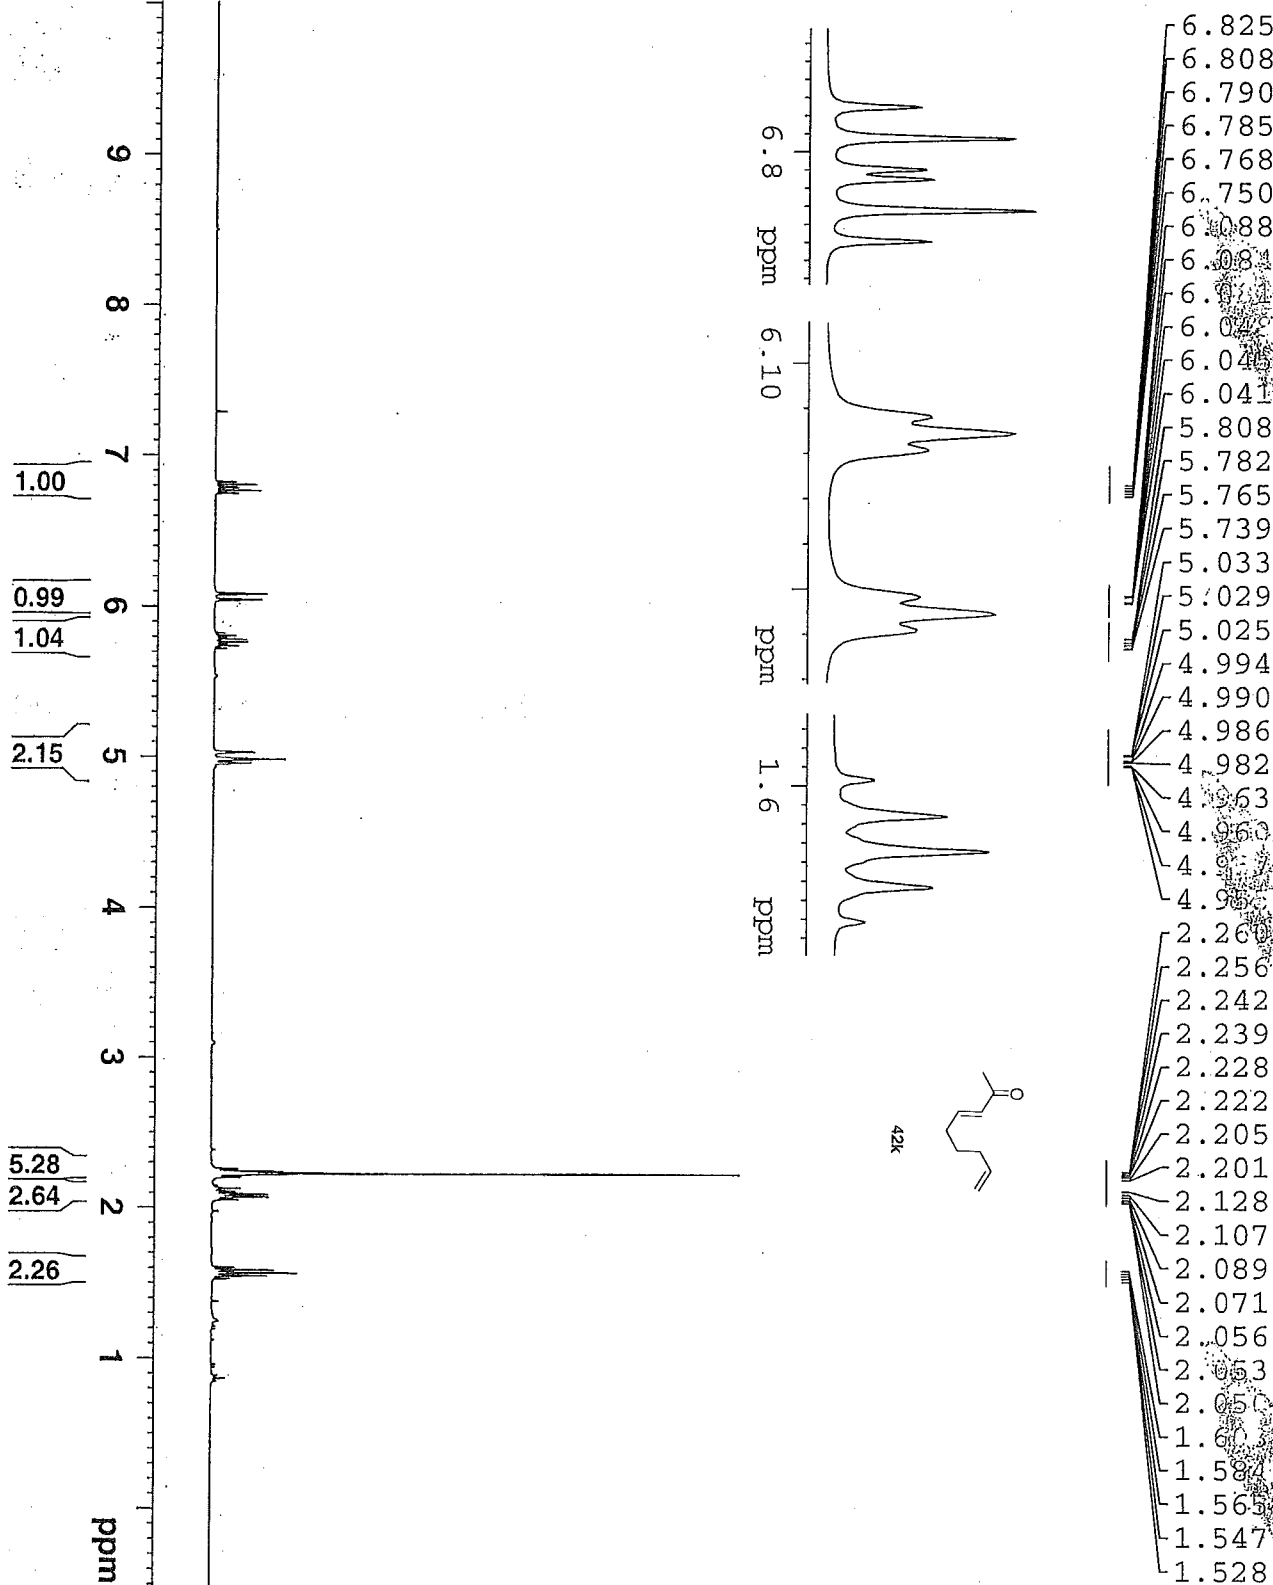

|         |                |
|---------|----------------|
| NAME    | HY15-47        |
| EXPNO   | 3              |
| PROCNO  | 1              |
| Date_   | 20100310       |
| Time    | 14.58          |
| INSTRUM | spec           |
| PROBHD  | 5 mm PABBO BB- |
| PULPROG | zg30           |
| TD      | 32768          |
| SOLVENT | CDCl3          |
| DS      | 32             |
| SWH     | 6410.256       |
| FIDRES  | 0.195625       |
| AQ      | 2.5559540      |
| RG      | 28.5           |
| DW      | 78.000         |
| DE      | 6.50           |
| TE      | 298.2          |
| D1      | 2.0000000      |
| TD0     | 1              |

  

|                        |             |
|------------------------|-------------|
| ===== CHANNEL f1 ===== |             |
| NUC1                   | 1H          |
| P1                     | 14.00       |
| PL1                    | 0.00        |
| PL1W                   | 10.27361584 |
| SFO1                   | 400.1378009 |
| SI                     | 32768       |
| SF                     | 400.1350000 |
| WDW                    | EM          |
| SSB                    | 0           |
| LB                     | 0.30        |
| GB                     | 0           |
| PC                     | 1.00        |

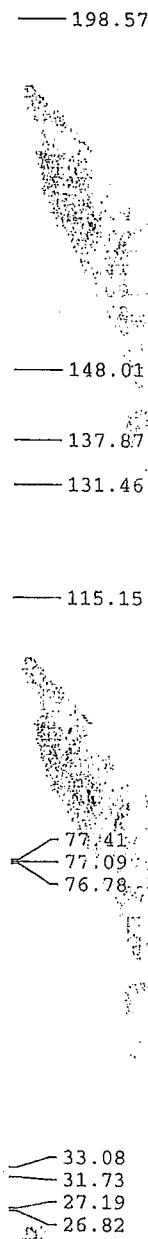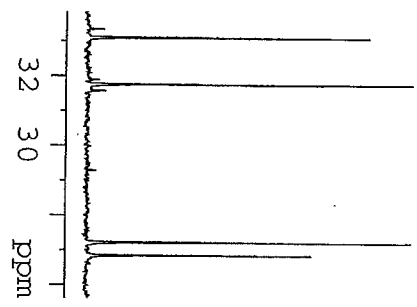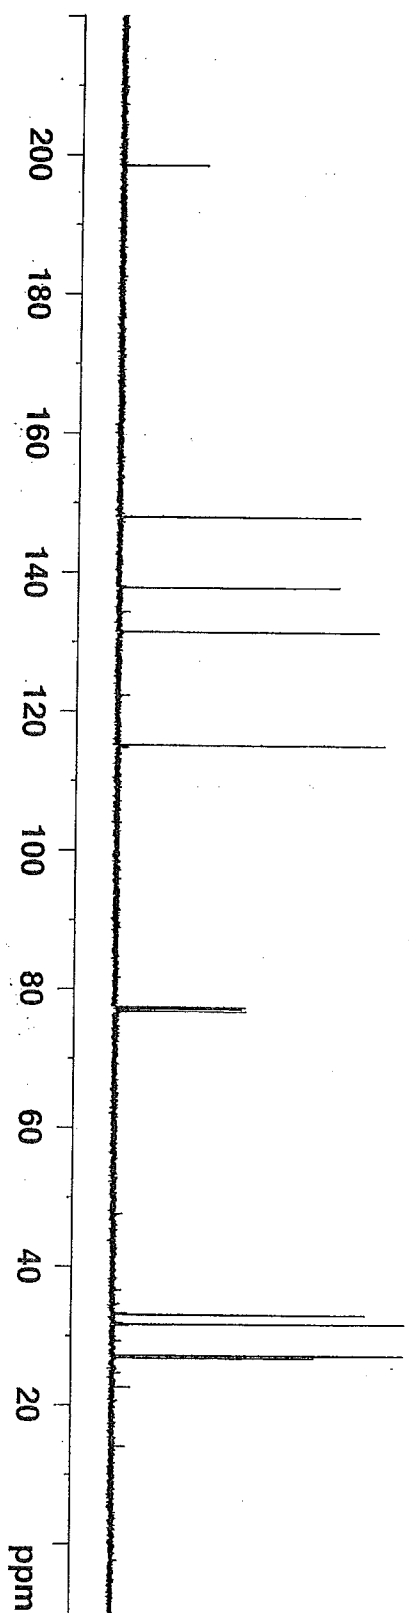

|         |                |
|---------|----------------|
| NAME    | HY15-47        |
| EXPNO   | 4              |
| PROCNO  | 1              |
| Date_   | 20100310       |
| Time    | 15.04          |
| INSTRUM | spect          |
| PROBHD  | 5 mm PABBO BB- |
| PULPROG | zgpg30         |
| TD      | 65536          |
| SOLVENT | CDCl3          |
| NS      | 58             |
| DS      | 4              |
| SWH     | 25125.629      |
| FIDRES  | 0.383387       |
| AQ      | 1.3042164      |
| RG      | 16384          |
| DW      | 19.900         |
| DE      | 6.50           |
| TE      | 298.7          |
| D1      | 2.00000000     |
| D11     | 0.03000000     |
| TD0     | 1              |

  

|                        |             |
|------------------------|-------------|
| ===== CHANNEL f1 ===== |             |
| NUC1                   | 13C         |
| P1                     | 9.00        |
| PL1                    | -2.00       |
| PL1W                   | 46.89702606 |
| SFO1                   | 100.6255966 |

  

|                        |             |
|------------------------|-------------|
| ===== CHANNEL f2 ===== |             |
| CPDPRG2                | waltz16     |
| NUC2                   | 1H          |
| PCPD2                  | 90.00       |
| PL2                    | 0.00        |
| PL12                   | 16.16       |
| PL13                   | 17.00       |
| PL2W                   | 10.27361584 |
| PL12W                  | 0.24872722  |
| PL13W                  | 0.20498557  |
| SFO2                   | 400.1366005 |
| SI                     | 32768       |
| SF                     | 100.6140260 |
| WDW                    | EM          |
| SSB                    | 0           |
| LB                     | 1.00        |
| GB                     | 0           |
| PC                     | 1.40        |

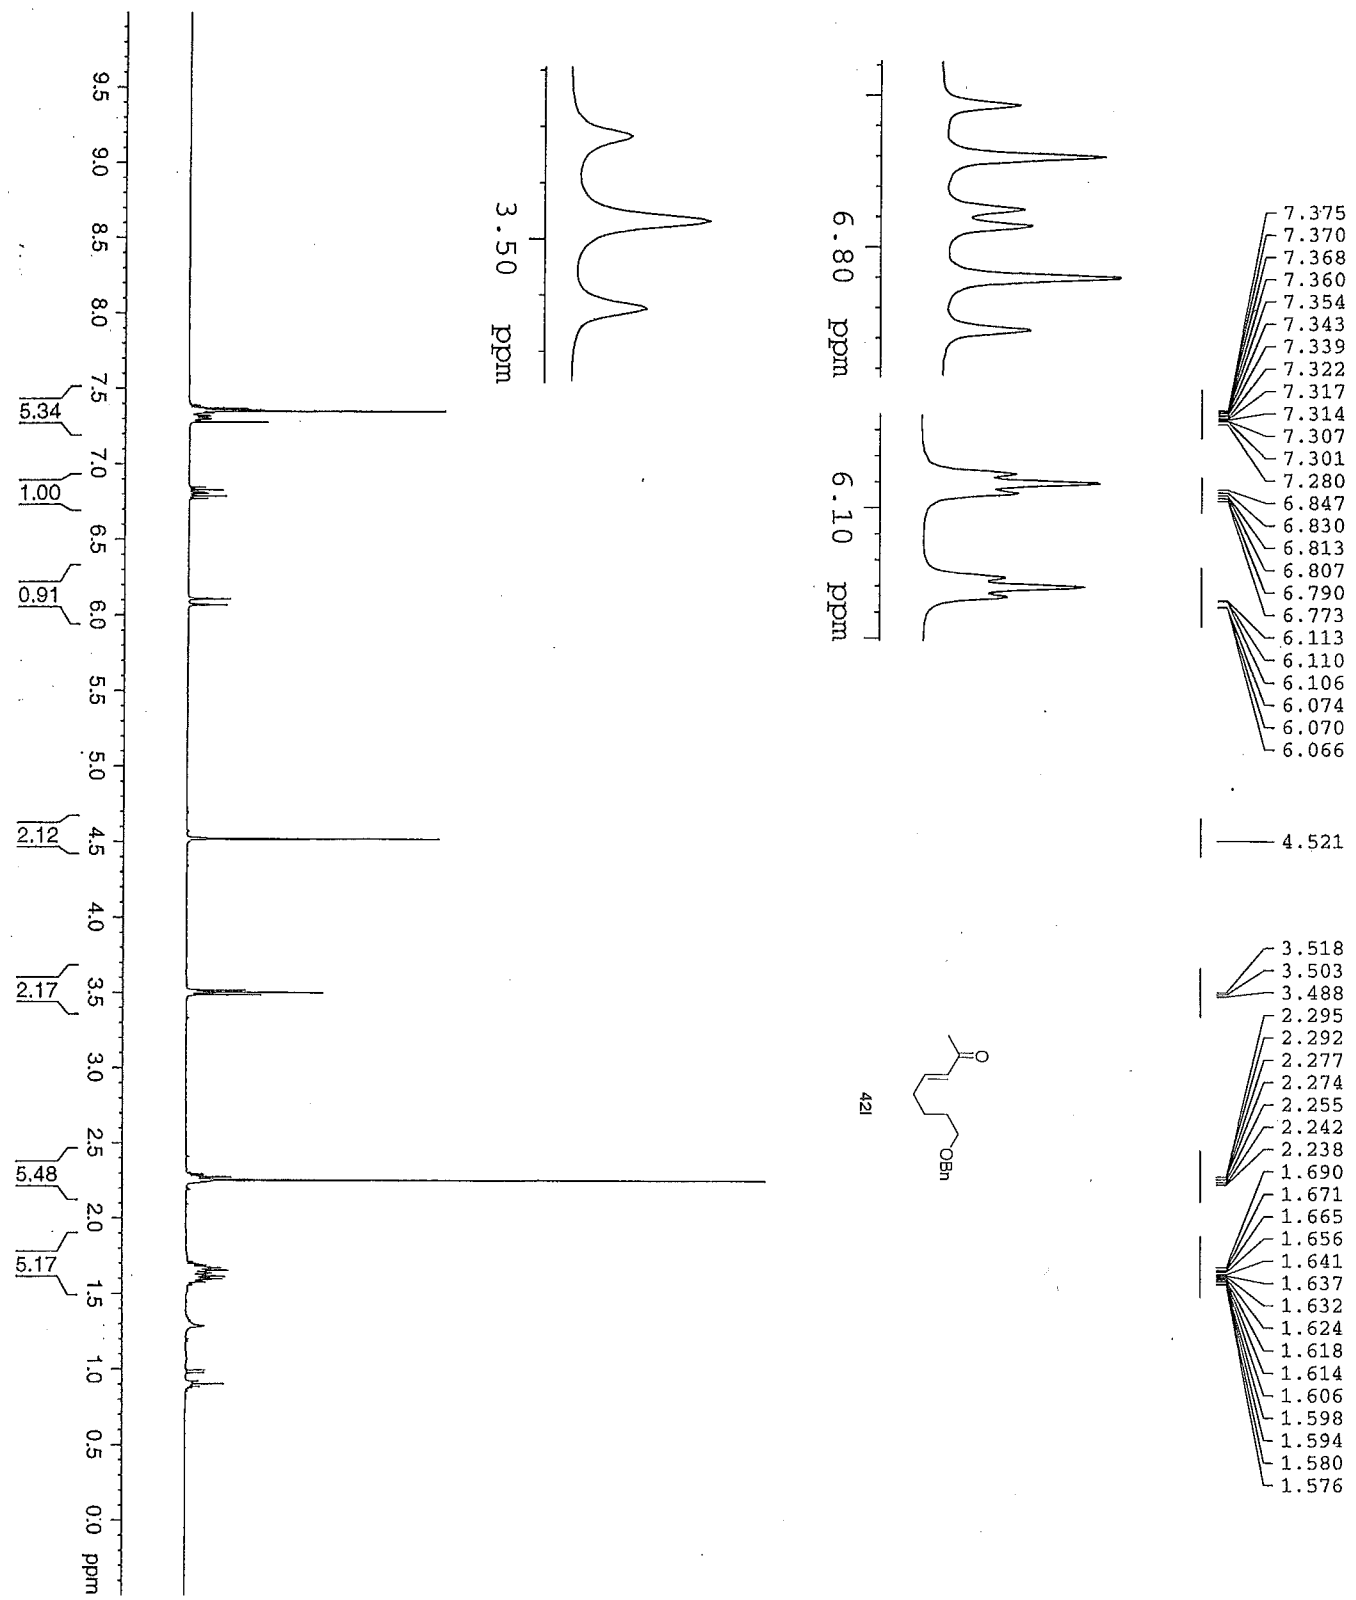

Current Data Parameters  
NAME HYL5-44  
EXNO 2  
PROCNO 1  
DT /m  
USER Hua

F2 - Acquisition Parameters  
Date\_ 20100129  
Time 13.27  
INSTRUM DPX400  
PROBHD BB-1H  
PULPROG zg30  
TD 32768  
SOLVENT CDCl3  
DS 2  
SS 2  
SWH 6410.256 Hz  
FIDRES 0.195625 Hz  
AQ 2.558540 sec  
RG 228.1  
DW 78.000 usec  
DE 8.600 usec  
TE 299.2 K  
D1 1.00000000 sec  
TDO 1

==== CHANNEL f1 =====  
NUC1 1H  
P1 13.50 usec  
PL -3.00 dB  
SFO1 400.2478017 MHz

F2 - Processing parameters  
SI 32768  
SF 400.2450000 MHz  
WDW EM  
SSB 0  
GB 0  
PC 1.00

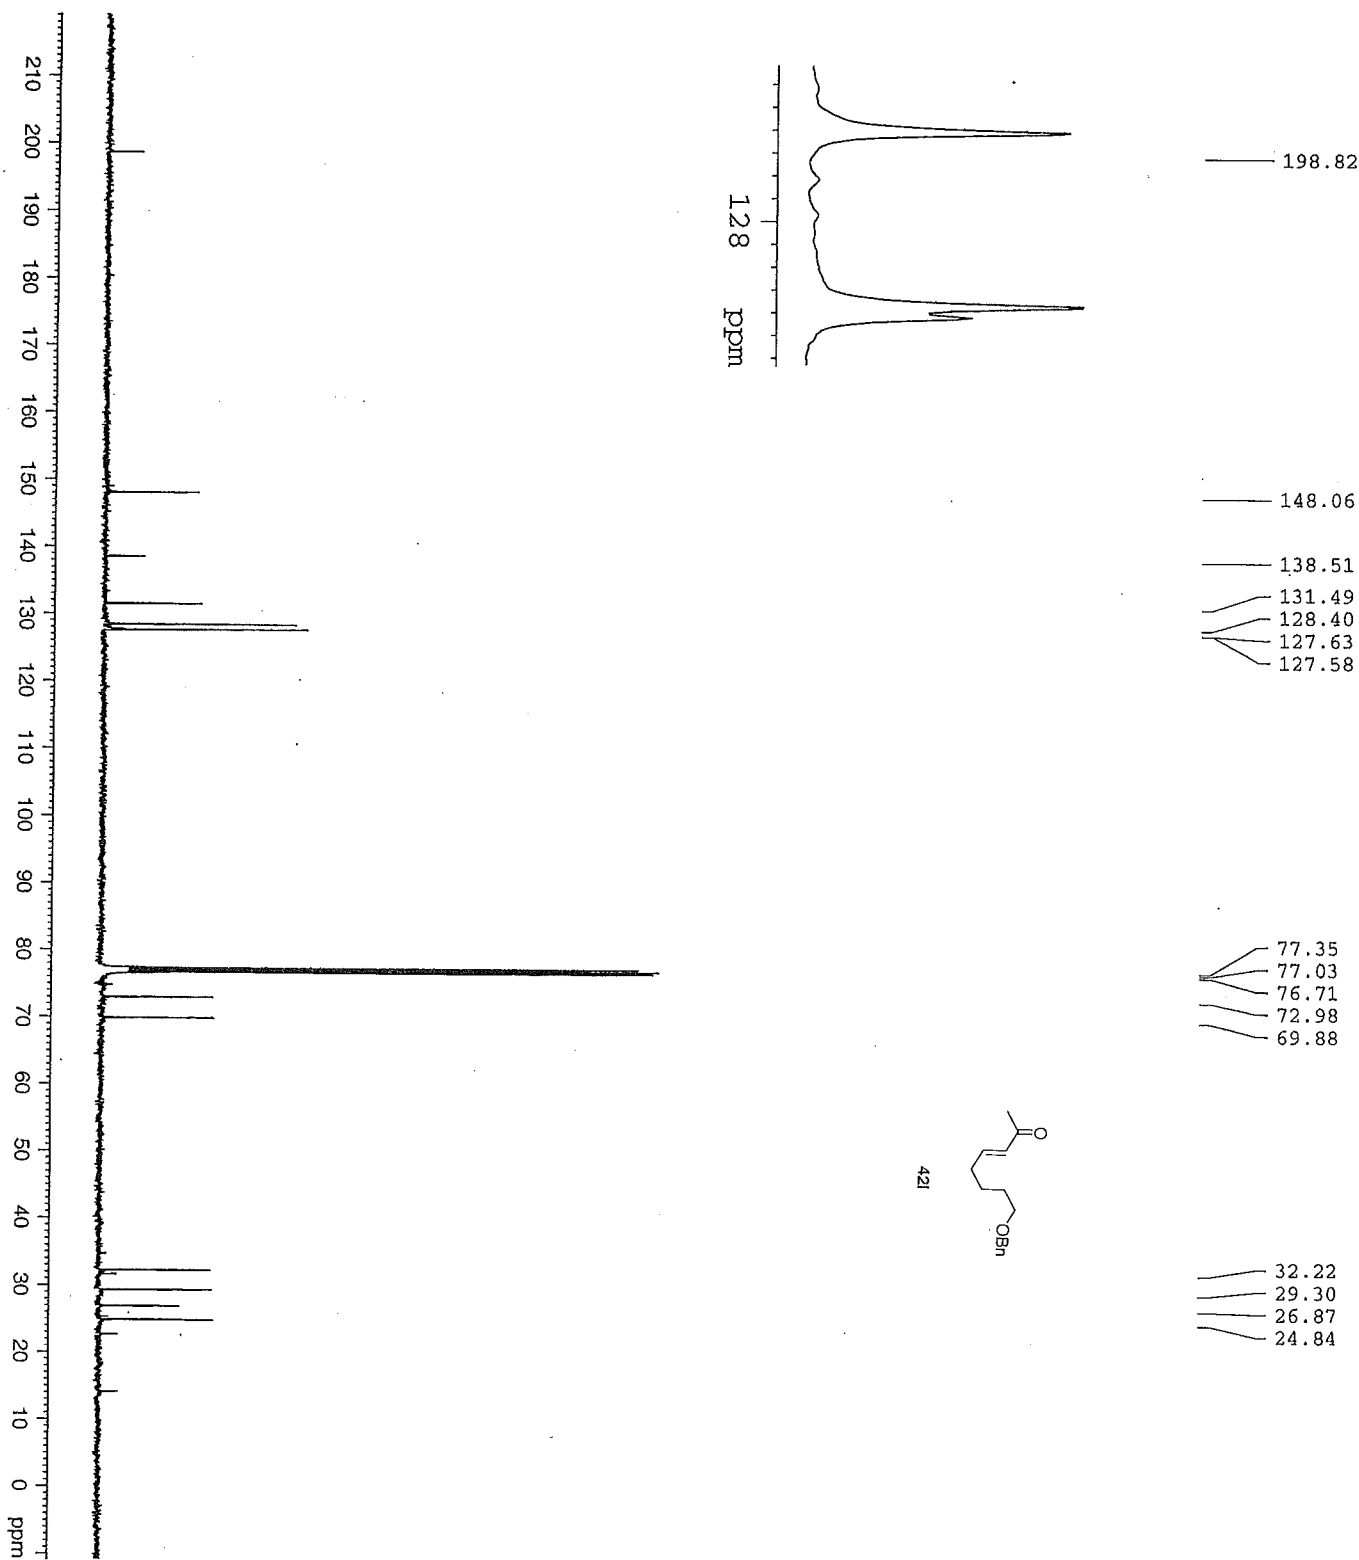

Current Data Parameters  
NAME HT15-44  
EXPNO 3  
PROCNO 1  
DT 1  
F2 - Acquisition Parameters  
Date\_ 2010122  
Time 14.22  
INSTRUM DFX400  
PROBHD 5 mm BBO BB-1H  
PULPROG zgpg30  
TD 65536  
SOLVENT CDCl3  
NS 899  
DS 4  
SWH 23980.814 Hz  
FIDRES 0.365918 Hz  
AQ 1.3664756 sec  
RG 7298.2  
DW 20.850 usec  
DE 6.00 usec  
TE 299.2 K  
D1 2.00000000 sec  
d11 0.03000000 sec  
DELTA 1.89999998 sec  
TD0 1  
===== CHANNEL f1 =====  
NUC1 13C  
P1 8.30 usec  
PL1 -3.00 dB  
SFO1 100.6517495 MHz  
===== CHANNEL f2 =====  
CEPRG2 waitz16  
NUC2 1H  
PCPD2 90.00 usec  
PL2 -3.00 dB  
PL12 15.00 dB  
PL13 15.00 dB  
SFO2 400.2466010 MHz  
F2 - Processing Parameters  
SI 32768  
SF 100.6416850 MHz  
WDW EM  
SSB 0  
LB 3.00 Hz  
GB 0  
PC 1.40

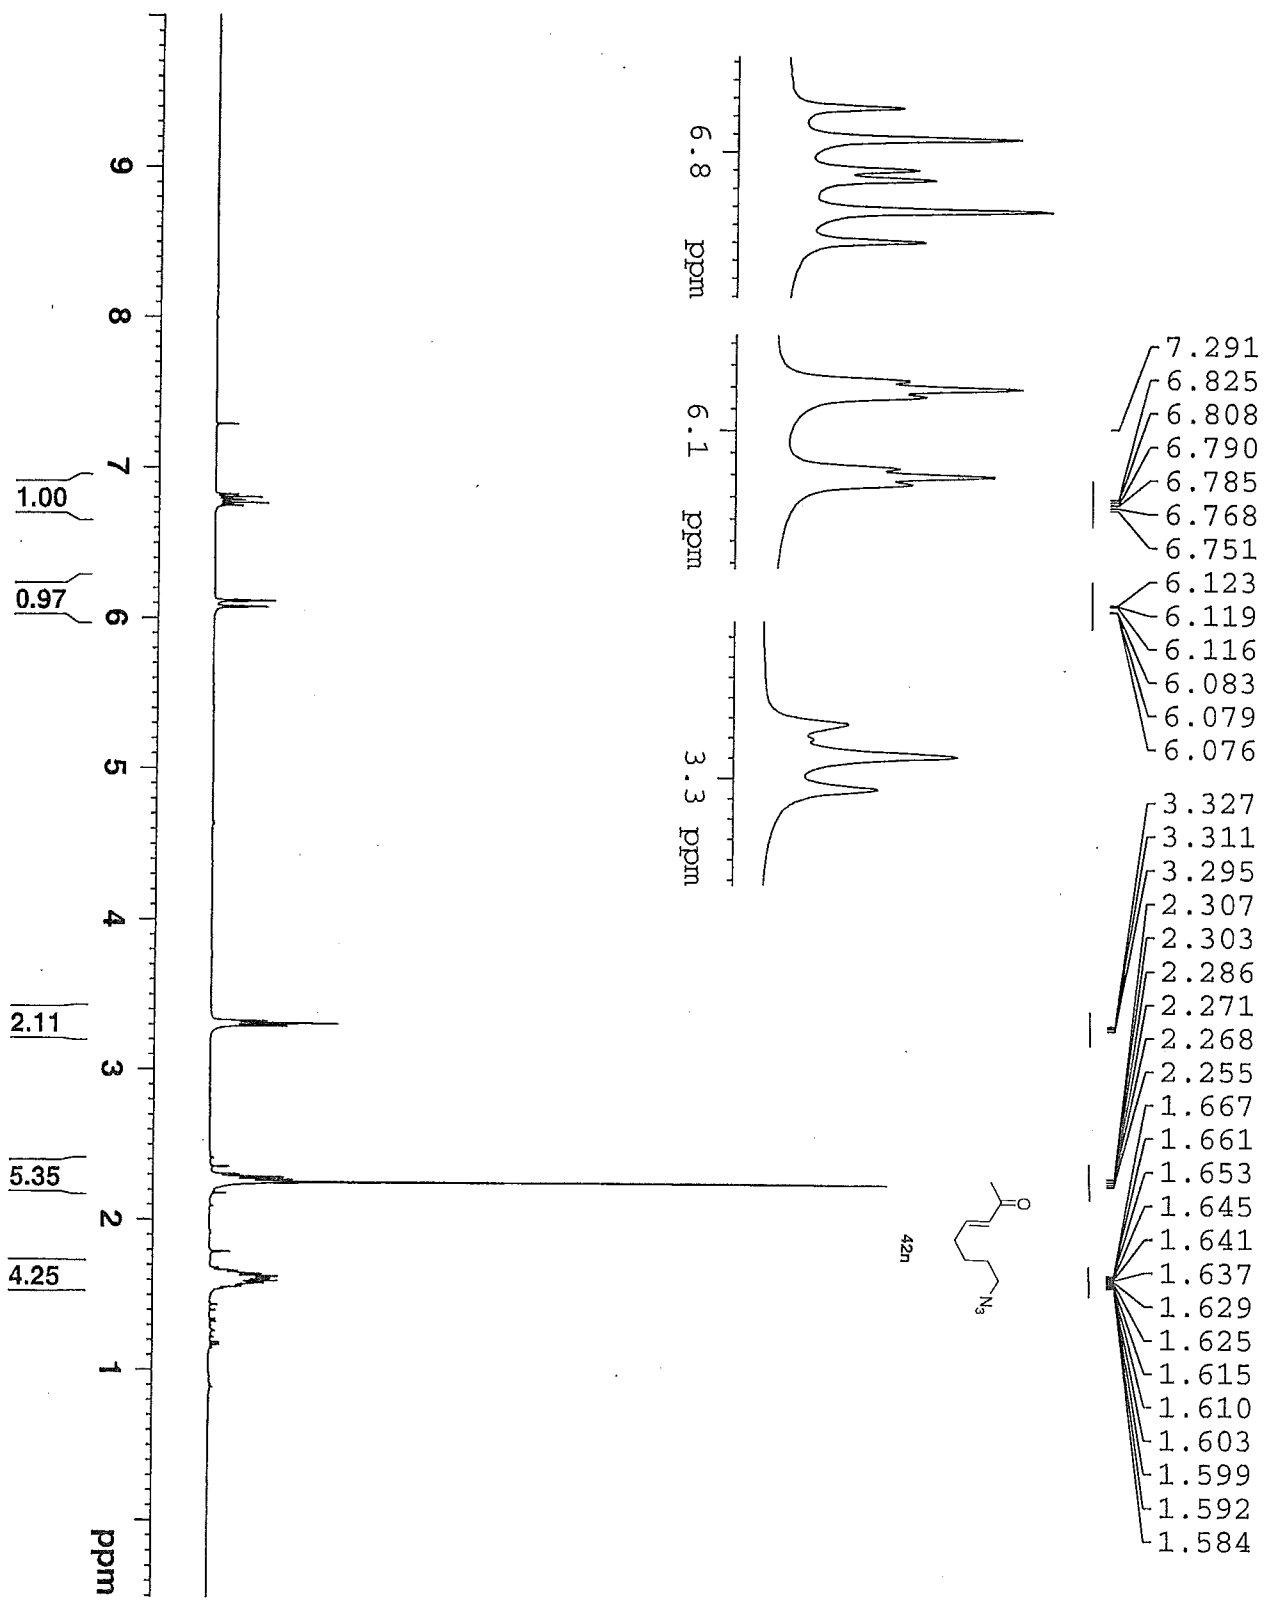

|                        |             |        |          |       |                |        |         |    |         |    |    |          |          |           |    |        |      |       |            |     |
|------------------------|-------------|--------|----------|-------|----------------|--------|---------|----|---------|----|----|----------|----------|-----------|----|--------|------|-------|------------|-----|
| NAME                   | EXPNO       | PROCNO | Date_    | Time  | INSTRUM        | PROBHD | PULPROG | TD | SOLVENT | NS | DS | SWH      | FIDRES   | AQ        | RG | DW     | DE   | TE    | D1         | TD0 |
| HY15-45                | 4           | 1      | 20100204 | 16.53 | 5 mm PABBO BB- | zg30   | 32768   | 32 | CDCl3   | 32 | 2  | 6410.256 | 0.195625 | 2.5559540 | 64 | 78.000 | 6.50 | 299.4 | 1.00000000 | 1   |
| ===== CHANNEL f1 ===== |             |        |          |       |                |        |         |    |         |    |    |          |          |           |    |        |      |       |            |     |
| NUC1                   | 1H          |        |          |       |                |        |         |    |         |    |    |          |          |           |    |        |      |       |            |     |
| P1                     | 14.00       |        |          |       |                |        |         |    |         |    |    |          |          |           |    |        |      |       |            |     |
| PL1                    | 0.00        |        |          |       |                |        |         |    |         |    |    |          |          |           |    |        |      |       |            |     |
| PL1W                   | 10.27361584 |        |          |       |                |        |         |    |         |    |    |          |          |           |    |        |      |       |            |     |
| SFO1                   | 400.1378009 |        |          |       |                |        |         |    |         |    |    |          |          |           |    |        |      |       |            |     |
| SI                     | 32768       |        |          |       |                |        |         |    |         |    |    |          |          |           |    |        |      |       |            |     |
| SF                     | 400.1350000 |        |          |       |                |        |         |    |         |    |    |          |          |           |    |        |      |       |            |     |
| WDW                    | EM          |        |          |       |                |        |         |    |         |    |    |          |          |           |    |        |      |       |            |     |
| SSB                    | 0           |        |          |       |                |        |         |    |         |    |    |          |          |           |    |        |      |       |            |     |
| LB                     | 0.30        |        |          |       |                |        |         |    |         |    |    |          |          |           |    |        |      |       |            |     |
| GB                     | 0           |        |          |       |                |        |         |    |         |    |    |          |          |           |    |        |      |       |            |     |
| PC                     | 1.00        |        |          |       |                |        |         |    |         |    |    |          |          |           |    |        |      |       |            |     |

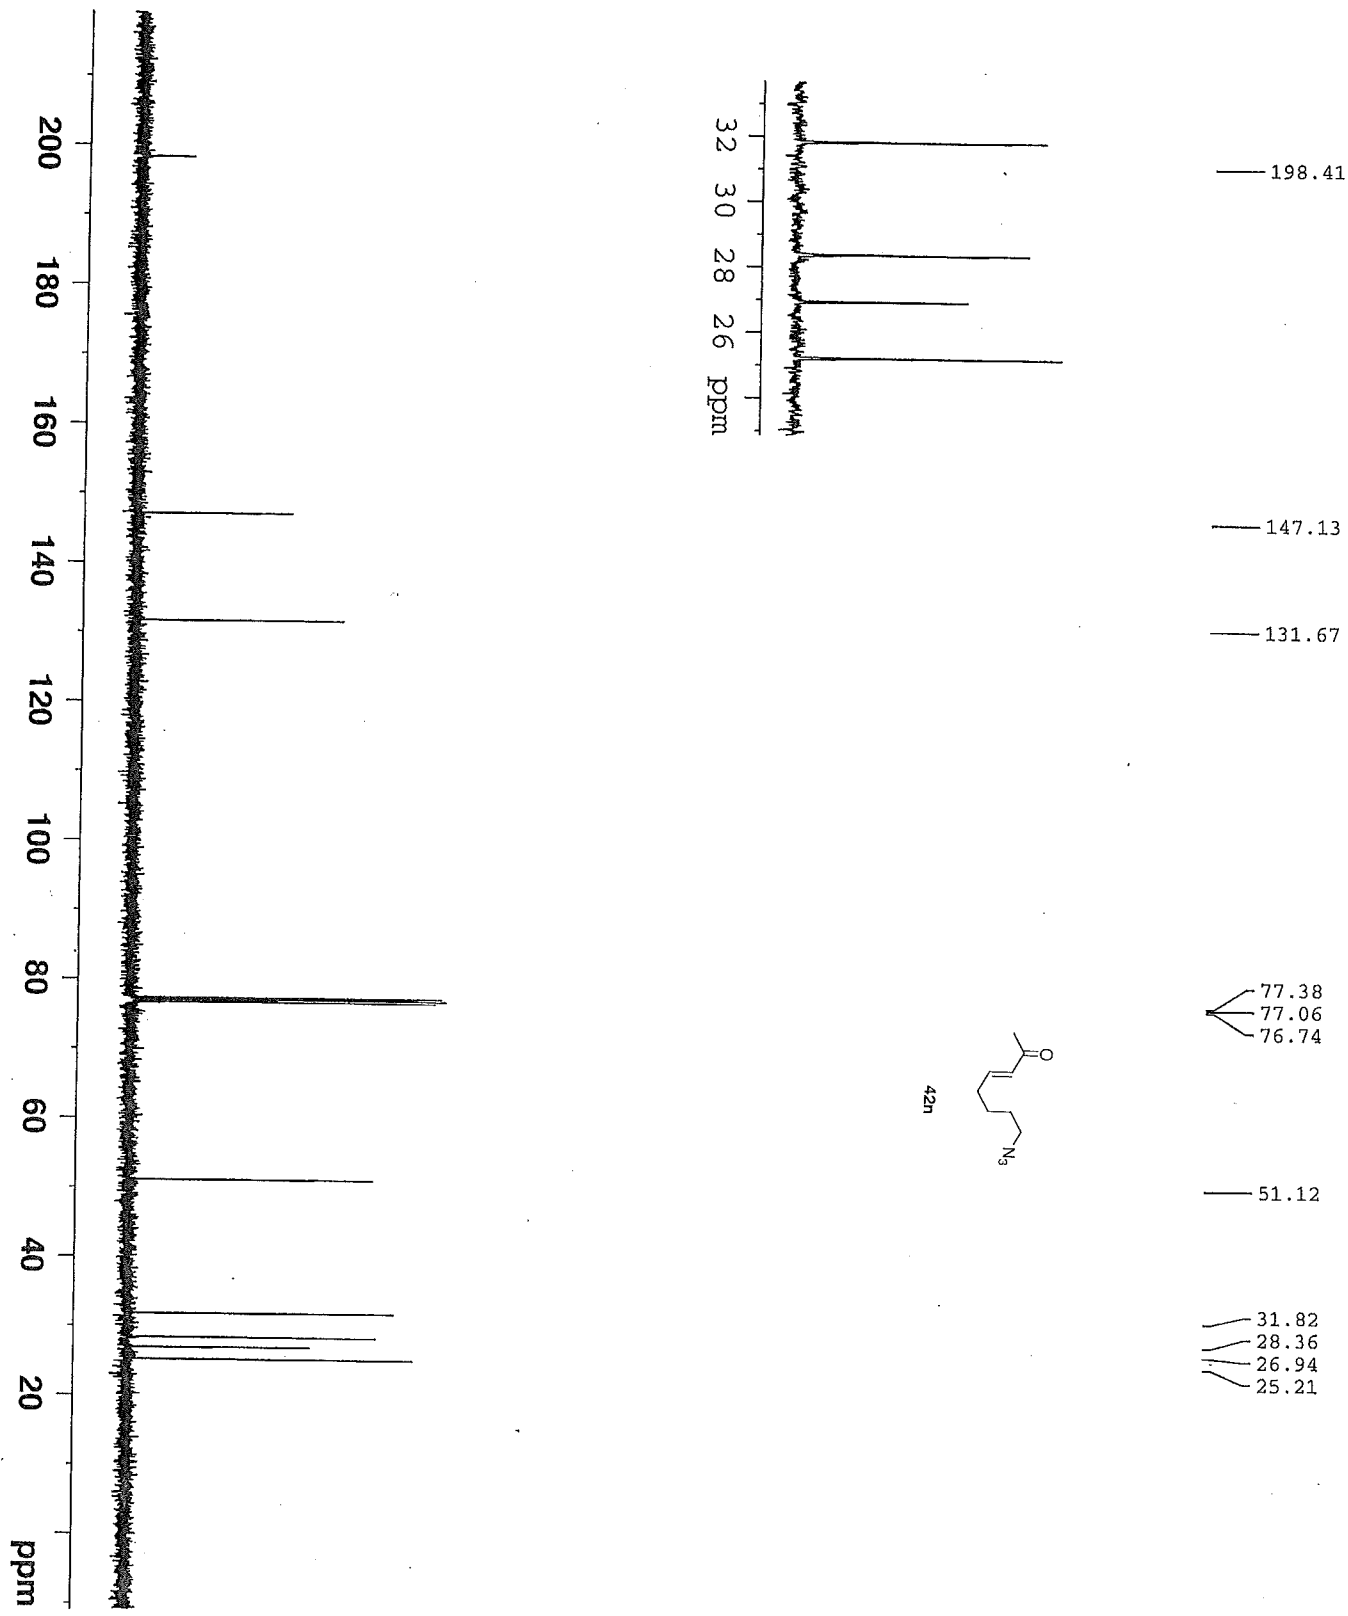

NAME HY15-45  
EXPNO 5  
PROCNO 1  
Date\_ 20100204  
Time 16.56  
INSTRUM spect  
PROBHD 5 mm PABBO BB-  
PULPROG zgpg30  
TD 65536  
SOLVENT CDCl3  
NS 47  
DS 4  
SWH 23980.814  
FIDRES 0.365918  
AQ 1.3664756  
RG 18390.4  
DW 20.850  
DE 6.50  
TE 299.6  
D1 2.0000000  
D11 0.0300000  
TD0 1

===== CHANNEL f1 =====  
NUC1 13C  
P1 9.00  
PL1 -2.00  
PLW 46.89702606  
SFO1 100.6240872

===== CHANNEL f2 =====  
CPDPRG2 waltz16  
NUC2 1H  
PCPD2 90.00  
PL2 0.00  
PL12 16.16  
PL13 17.00  
PL2W 10.27361584  
PL12W 0.24872722  
PL13W 0.20498557  
SFO2 400.1366005  
SI 32768  
SF 100.6140260  
WDM EM  
SSB 0  
LB 1.00  
GB 0  
PC 1.40



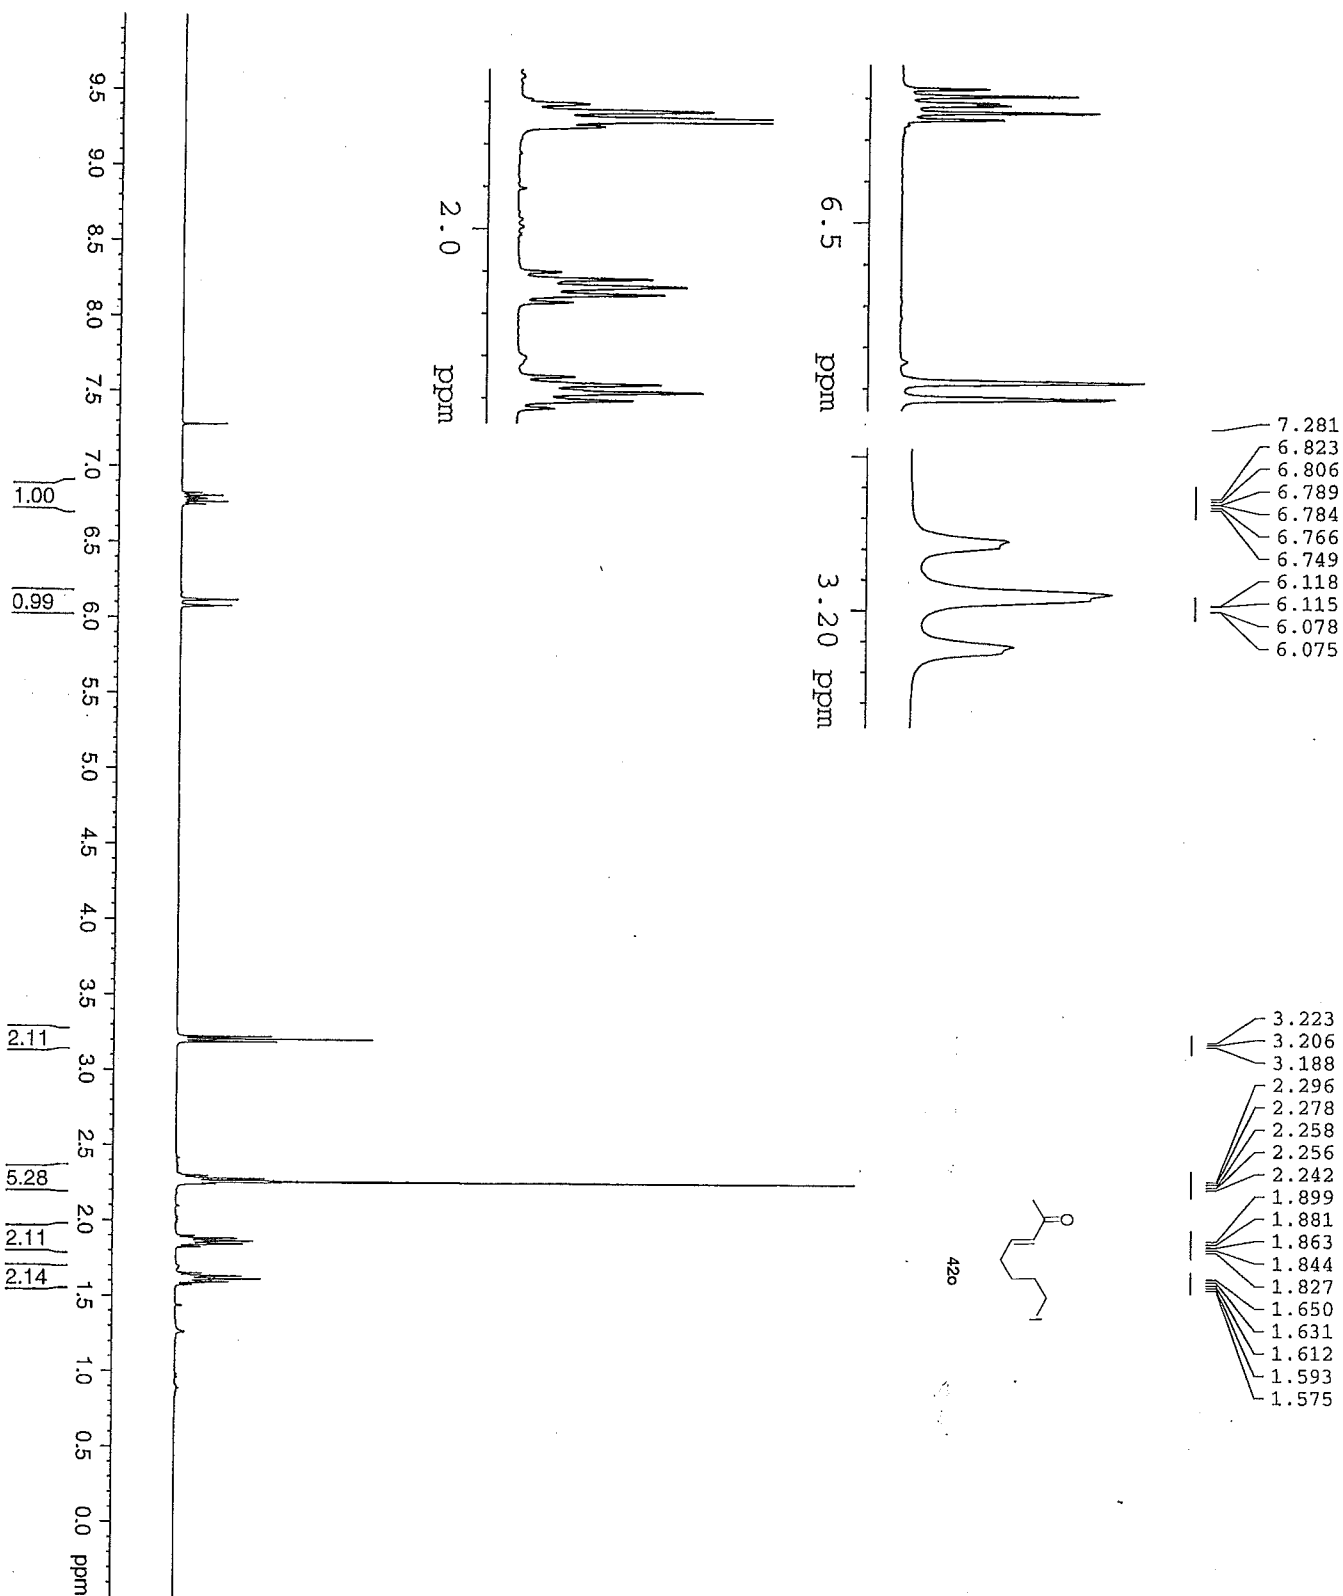

Current Data Parameters  
NAME HY15-25  
EXNO 1  
PROCNO 1  
DI 1  
USER Hua

F2 - Acquisition Parameters  
Date\_ 2010114  
Time 14.17  
INSTRUM DPK400  
PROBHD 5 mm BBO BB-1H  
PULPROG zgpg30  
TD 32768  
SOLVENT CDCl3  
NS 32  
DS 2  
SWH 6410.256 Hz  
FIDRES 0.195625 Hz  
AQ 2.5559540 sec  
RG 181  
DW 78.000 usec  
DE 6.00 usec  
TE 299.2 K  
D1 1.00000000 sec  
TD0 1

===== CHANNEL f1 =====  
NUC1 1H  
P1 13.50 usec  
PL1 -3.00 dB  
SFO1 400.2478017 MHz

F2 - Processing parameters  
SI 32768  
SF 400.2450000 MHz  
WDW EM  
SSB 0  
LB 0.30 Hz  
GB 0  
PC 1.00

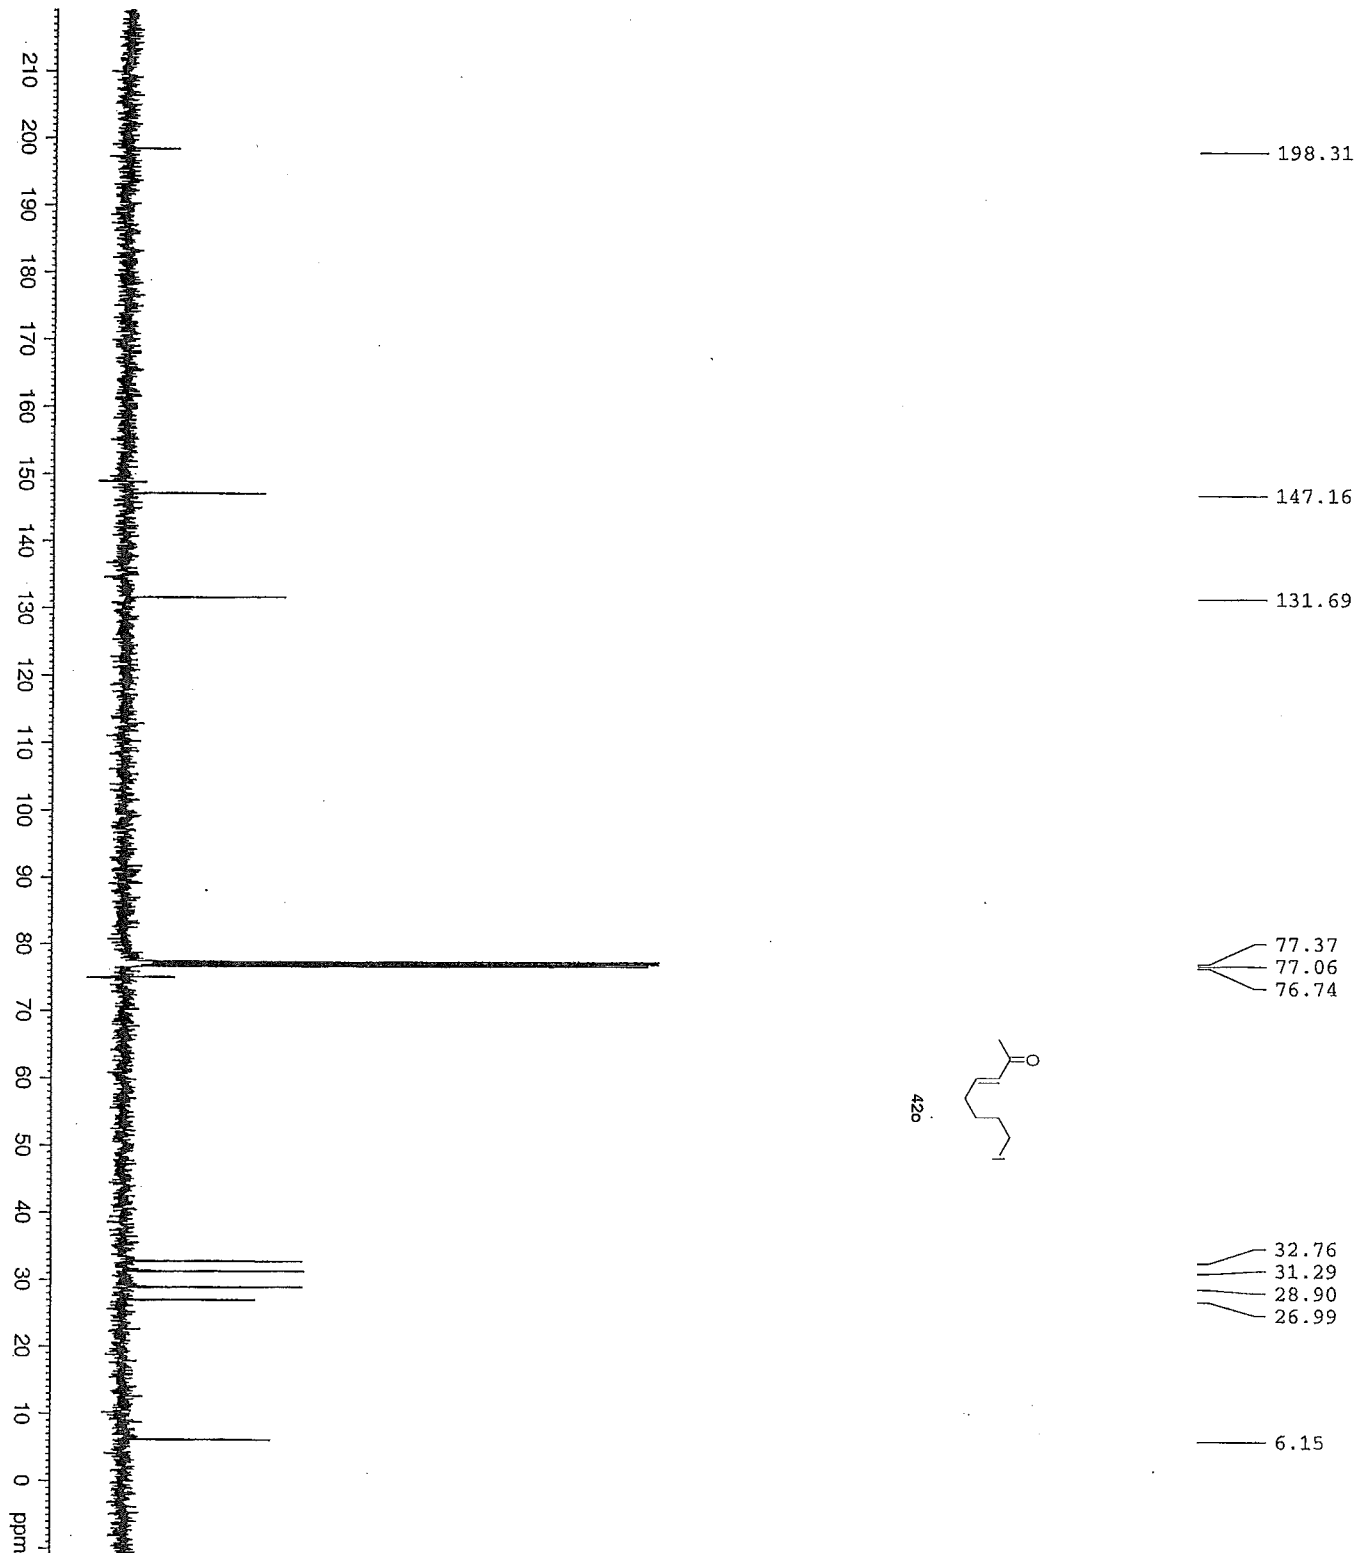

Current Data Parameters  
NAME HYL5-25  
EXPNO 2  
PROCNO 1  
DU /m  
USER Hua

F2 - Acquisition Parameters  
Date\_ 20100114  
Time 14.22  
INSTRUM DPX400  
PROBHD 5 mm BBO BB-1H  
PULPROG zgpg30  
TD 65536  
SOLVENT CDCl3  
NS 617  
DS 4  
SWH 23980.814 Hz  
FIDRES 0.365918 Hz  
AQ 1.364756 sec  
RG 11585.2  
RW 20.850 usec  
DM 6.00 usec  
DE 289.2 K  
D1 2.00000000 sec  
d11 0.05000000 sec  
DELTA 1.89999998 sec  
TD0 1

==== CHANNEL f1 =====  
NUC1 13C  
P1 8.30 usec  
PL1 -3.00 dB  
SFO1 100.6517495 MHz

==== CHANNEL f2 =====  
CPDPRG2 waltz16  
NUC2 1H  
PCPD2 90.00 usec  
PL2 -3.00 dB  
PL12 15.00 dB  
PL13 15.00 dB  
SFO2 400.2466010 MHz

F2 - Processing parameters  
SI 32768  
SF 100.6416850 MHz  
WDW EM  
SSB 0  
LB 3.00 Hz  
GB 0  
FC 1.40

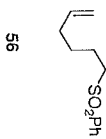

| NAME    | EXPNO          | HY15-72 |
|---------|----------------|---------|
| PROCN0  | 1              |         |
| Date_   | 20100303       |         |
| Time    | 15.16          |         |
| INSTRUM | 5 mm PABBO BB- |         |
| PROBHD  | zg30           |         |
| PULPROG | 32768          |         |
| SOLVENT | CDCl3          |         |
| NS      | 32             |         |
| DS      | 2              |         |
| SWH     | 6410.256       |         |
| FIDRES  | 0.195625       |         |
| AQ      | 2.5559540      |         |
| RG      | 32             |         |
| DW      | 78.000         |         |
| DE      | 6.50           |         |
| TE      | 298.2          |         |
| D1      | 2.00000000     |         |
| TD0     | 1              |         |

  

| ===== CHANNEL f1 ===== | 1H          |
|------------------------|-------------|
| NUC1                   | 1H          |
| P1                     | 14.00       |
| PL1                    | 0.00        |
| PL1M                   | 10.27361584 |
| SFO1                   | 400.1378009 |
| SI                     | 32768       |
| SF                     | 400.1350000 |
| WDW                    | EM          |
| SSB                    | 0           |
| LB                     | 0.30        |
| GB                     | 0           |
| PC                     | 1.00        |

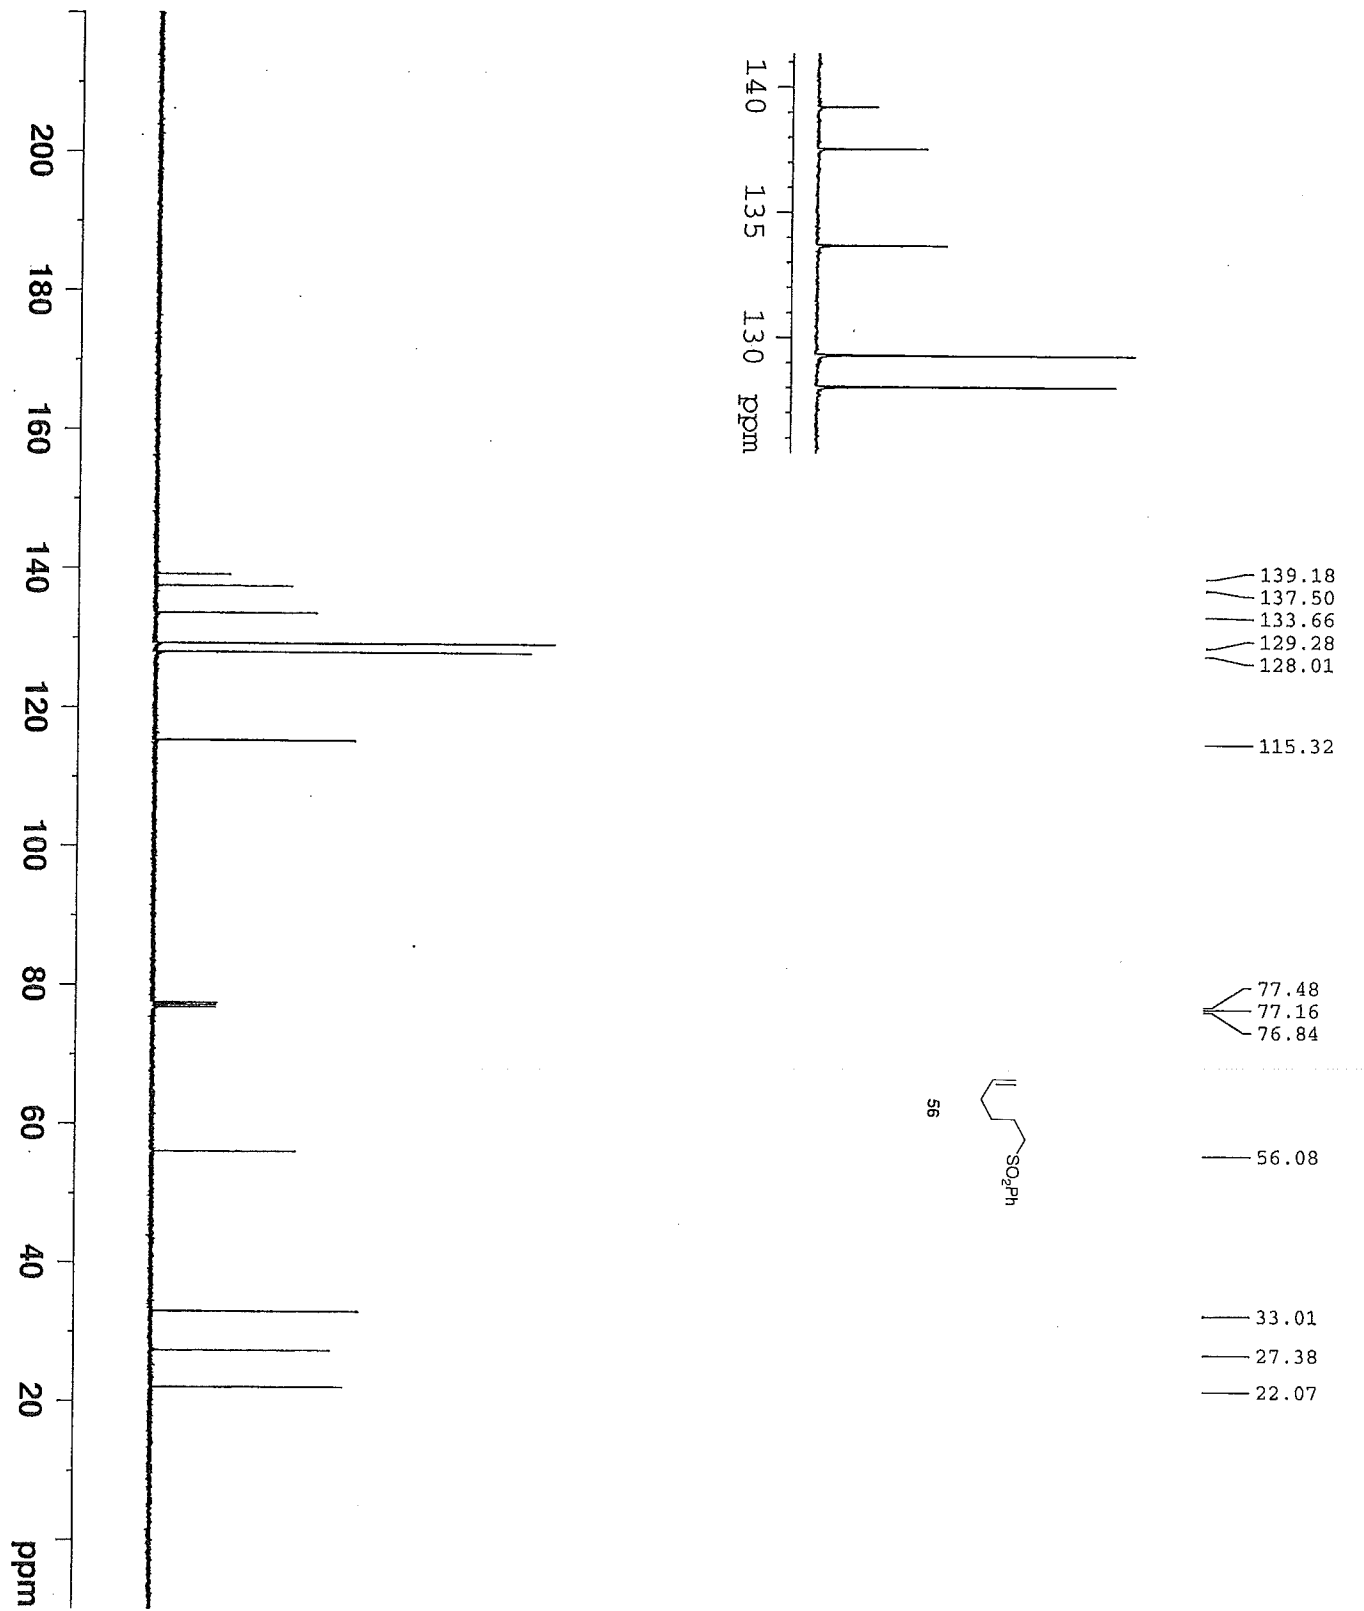

|         |                |
|---------|----------------|
| NAME    | HY15-72        |
| EXPNO   | 2              |
| PROCNO  | 1              |
| Date_   | 20100303       |
| Time    | 15.22          |
| INSTRUM | spect          |
| PROBHD  | 5 mm PABBO BB- |
| PULPROG | zgpg30         |
| TD      | 65536          |
| SOLVENT | CDCl3          |
| NS      | 63             |
| DS      | 4              |
| SWH     | 25125.629      |
| FIDRES  | 0.383387       |
| AQ      | 1.3042164      |
| RG      | 14596.5        |
| DW      | 19.900         |
| DE      | 6.50           |
| TE      | 298.9          |
| D1      | 2.00000000     |
| D11     | 0.03000000     |
| TD0     | 1              |

  

|                        |             |
|------------------------|-------------|
| ===== CHANNEL f1 ===== |             |
| NUC1                   | 13C         |
| P1                     | 9.00        |
| PL1                    | -2.00       |
| PL1W                   | 46.89702606 |
| SFO1                   | 100.6255966 |

  

|                        |             |
|------------------------|-------------|
| ===== CHANNEL f2 ===== |             |
| CPDPRG2                | waltz16     |
| NUC2                   | 1H          |
| PCPD2                  | 90.00       |
| PL2                    | 0.00        |
| PL12                   | 16.16       |
| PL13                   | 17.00       |
| PL2W                   | 10.27361584 |
| PL12W                  | 0.24872722  |
| PL13W                  | 0.20498557  |
| SFO2                   | 400.1366005 |
| SI                     | 32768       |
| SF                     | 100.6140260 |
| WDW                    | EM          |
| SSB                    | 0           |
| LB                     | 1.00        |
| GB                     | 0           |
| PC                     | 1.40        |

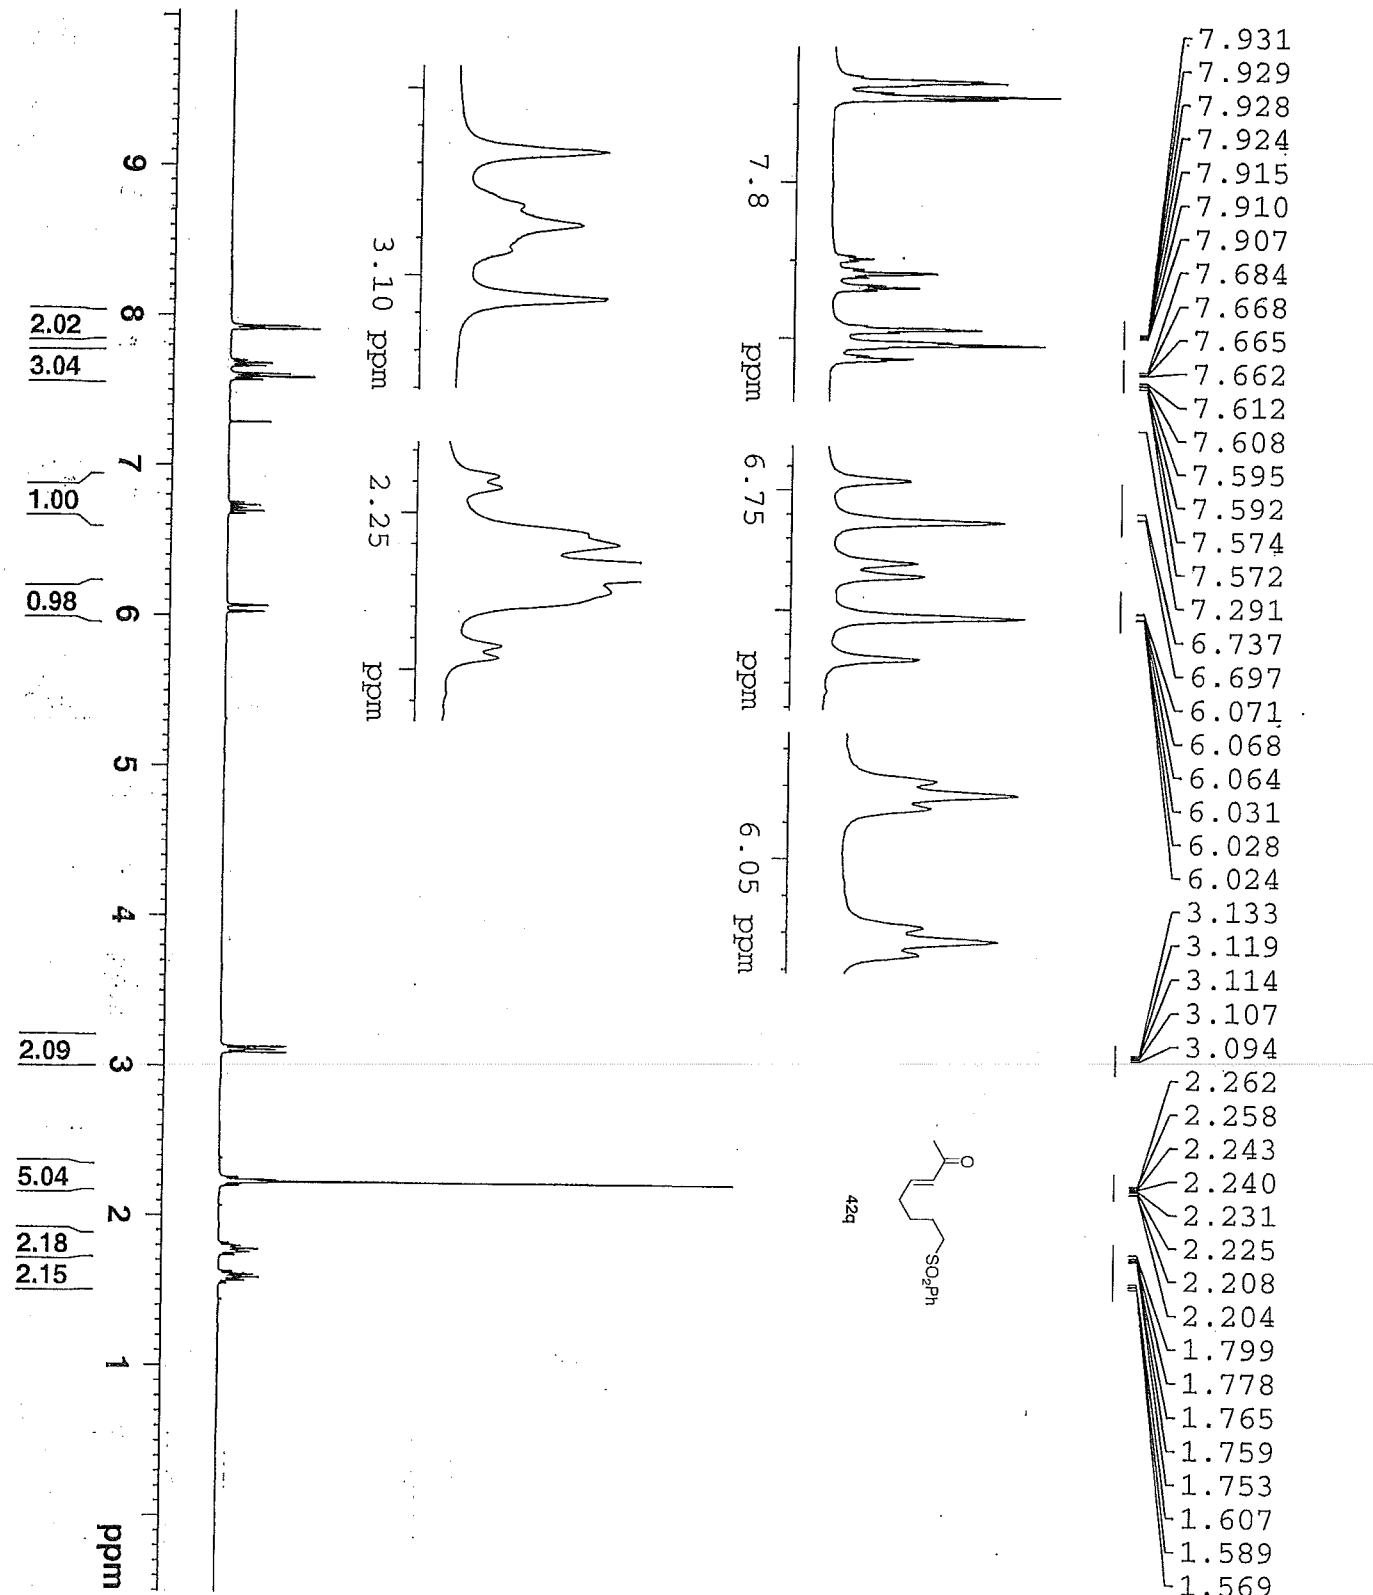

|         |                |
|---------|----------------|
| NAME    | HY15-73        |
| EXPNO   | 1              |
| PROCNO  | 1              |
| Date_   | 20100309       |
| Time    | 10.01          |
| INSTRUM | spect          |
| PROBHD  | 5 mm PABBO BB- |
| PULPROG | zg30           |
| TD      | 32768          |
| SOLVENT | CDCl3          |
| NS      | 32             |
| DS      | 2              |
| SWH     | 6410.256       |
| FIDRES  | 0.195625       |
| AQ      | 2.5559540      |
| RG      | 71.8           |
| DW      | 78.000         |
| DE      | 6.50           |
| TE      | 298.2          |
| D1      | 2.00000000     |
| TD0     | 1              |

  

|       |             |       |
|-------|-------------|-------|
| ===== | CHANNEL f1  | ===== |
| NUC1  | 1H          |       |
| P1    | 14.00       |       |
| PL1   | 0.00        |       |
| PL1W  | 10.27361584 |       |
| SFO1  | 400.1378009 |       |
| SI    | 32768       |       |
| SF    | 400.1350000 |       |
| WDW   | EM          |       |
| SSB   | 0           |       |
| LB    | 0.30        |       |
| GB    | 0           |       |
| PC    | 1.00        |       |

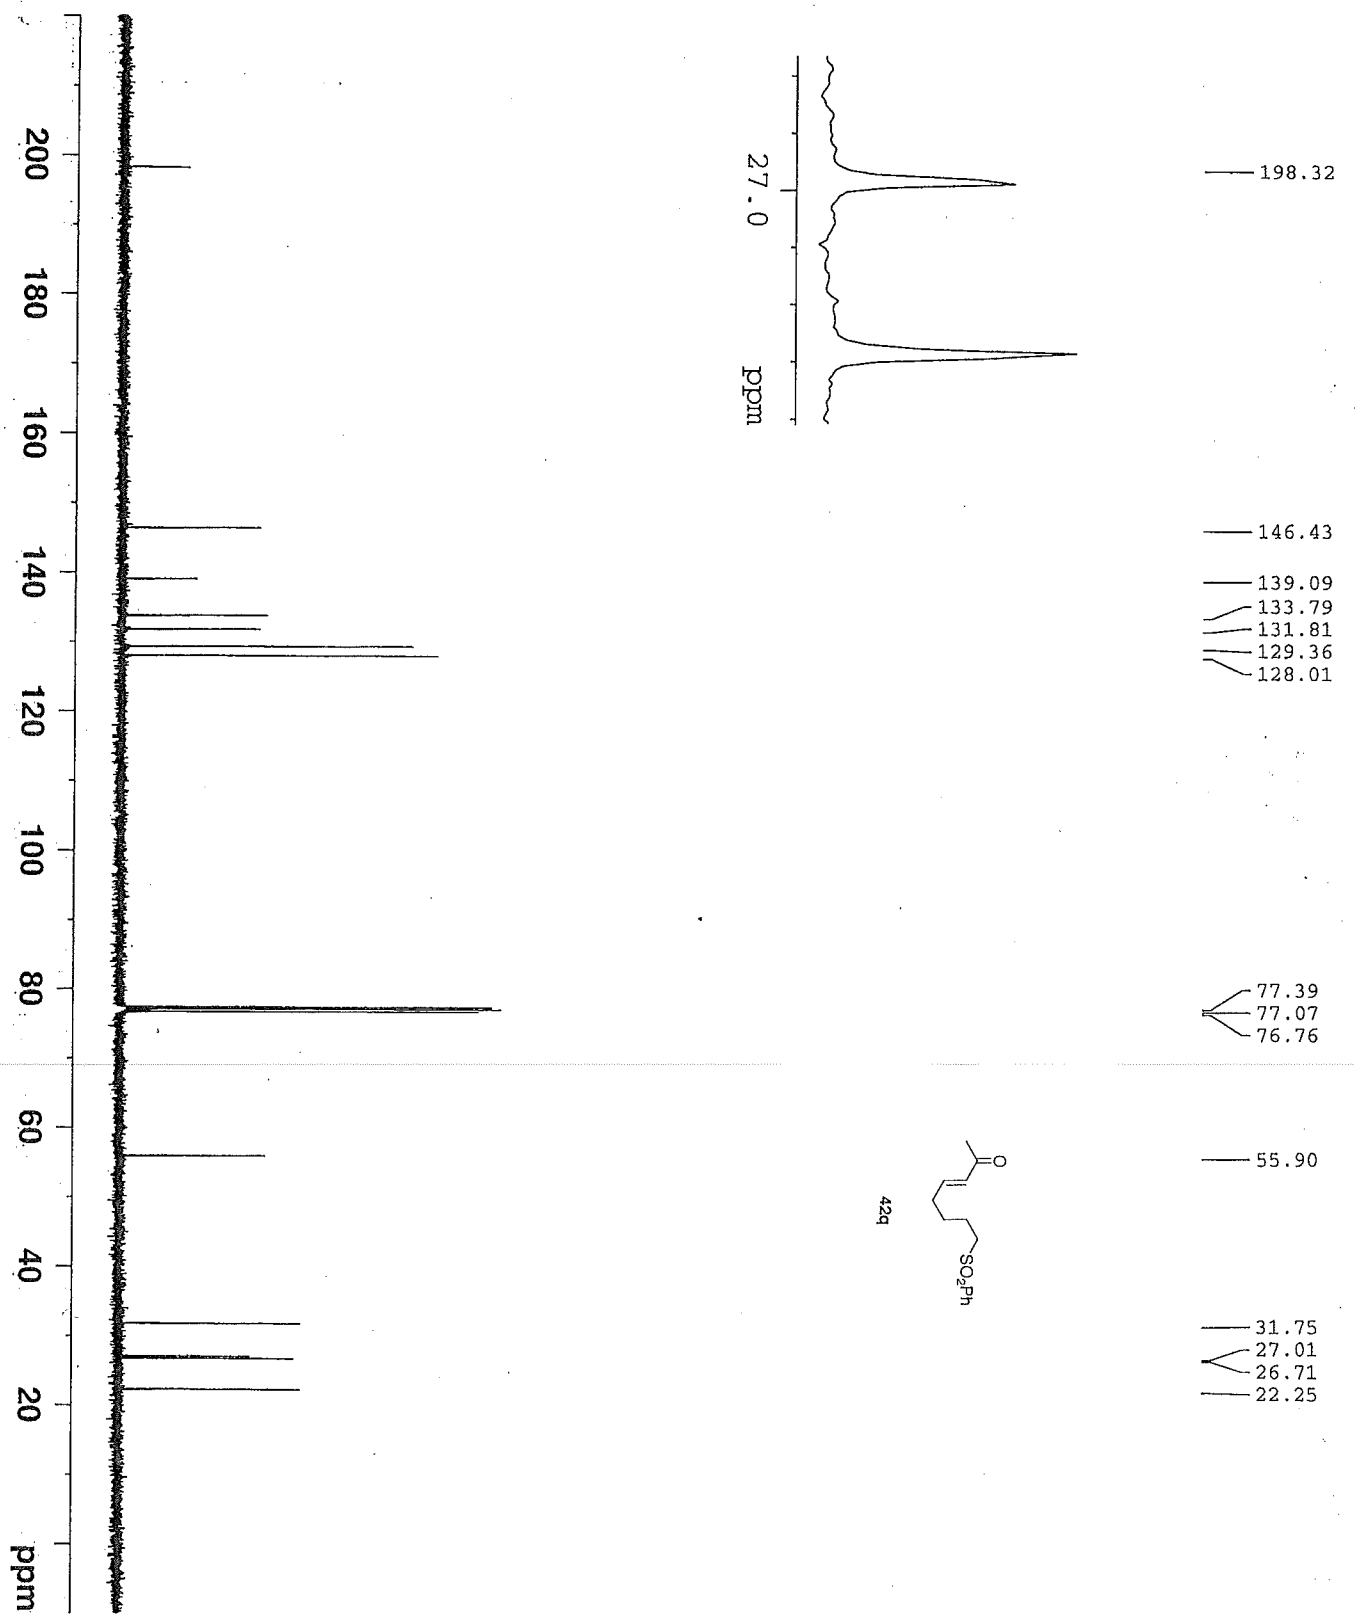

|         |                |
|---------|----------------|
| NAME    | HY15-73        |
| EXPNO   | 2              |
| PROCNO  | 1              |
| Date_   | 20100309       |
| Time    | 10.08          |
| INSTRUM | spect          |
| PROBHD  | 5 mm PABBO BB- |
| PULPROG | zgpg30         |
| TD      | 65536          |
| SOLVENT | CDCl3          |
| NS      | 85             |
| DS      | 4              |
| SWH     | 25125.629      |
| FIDRES  | 0.383387       |
| AQ      | 1.3042164      |
| RG      | 18390.4        |
| DW      | 19.900         |
| DE      | 6.50           |
| TE      | 298.6          |
| D1      | 2.00000000     |
| D11     | 0.03000000     |
| TD0     | 1              |

|                        |             |
|------------------------|-------------|
| ===== CHANNEL f1 ===== |             |
| NUC1                   | 13C         |
| P1                     | 9.00        |
| PL1                    | -2.00       |
| PL1W                   | 46.89702606 |
| SFO1                   | 100.6255966 |

|                        |             |
|------------------------|-------------|
| ===== CHANNEL f2 ===== |             |
| CPDPRG2                | waltz16     |
| NUC2                   | 1H          |
| PCPD2                  | 90.00       |
| PL2                    | 0.00        |
| PL12                   | 16.16       |
| PL13                   | 17.00       |
| PL2W                   | 10.27361584 |
| PL12W                  | 0.24872722  |
| PL13W                  | 0.20498557  |
| SFO2                   | 400.1366005 |
| SI                     | 32768       |
| SF                     | 100.6140260 |
| WDW                    | EM          |
| SSB                    | 0           |
| LB                     | 1.00        |
| GB                     | 0           |
| PC                     | 1.40        |

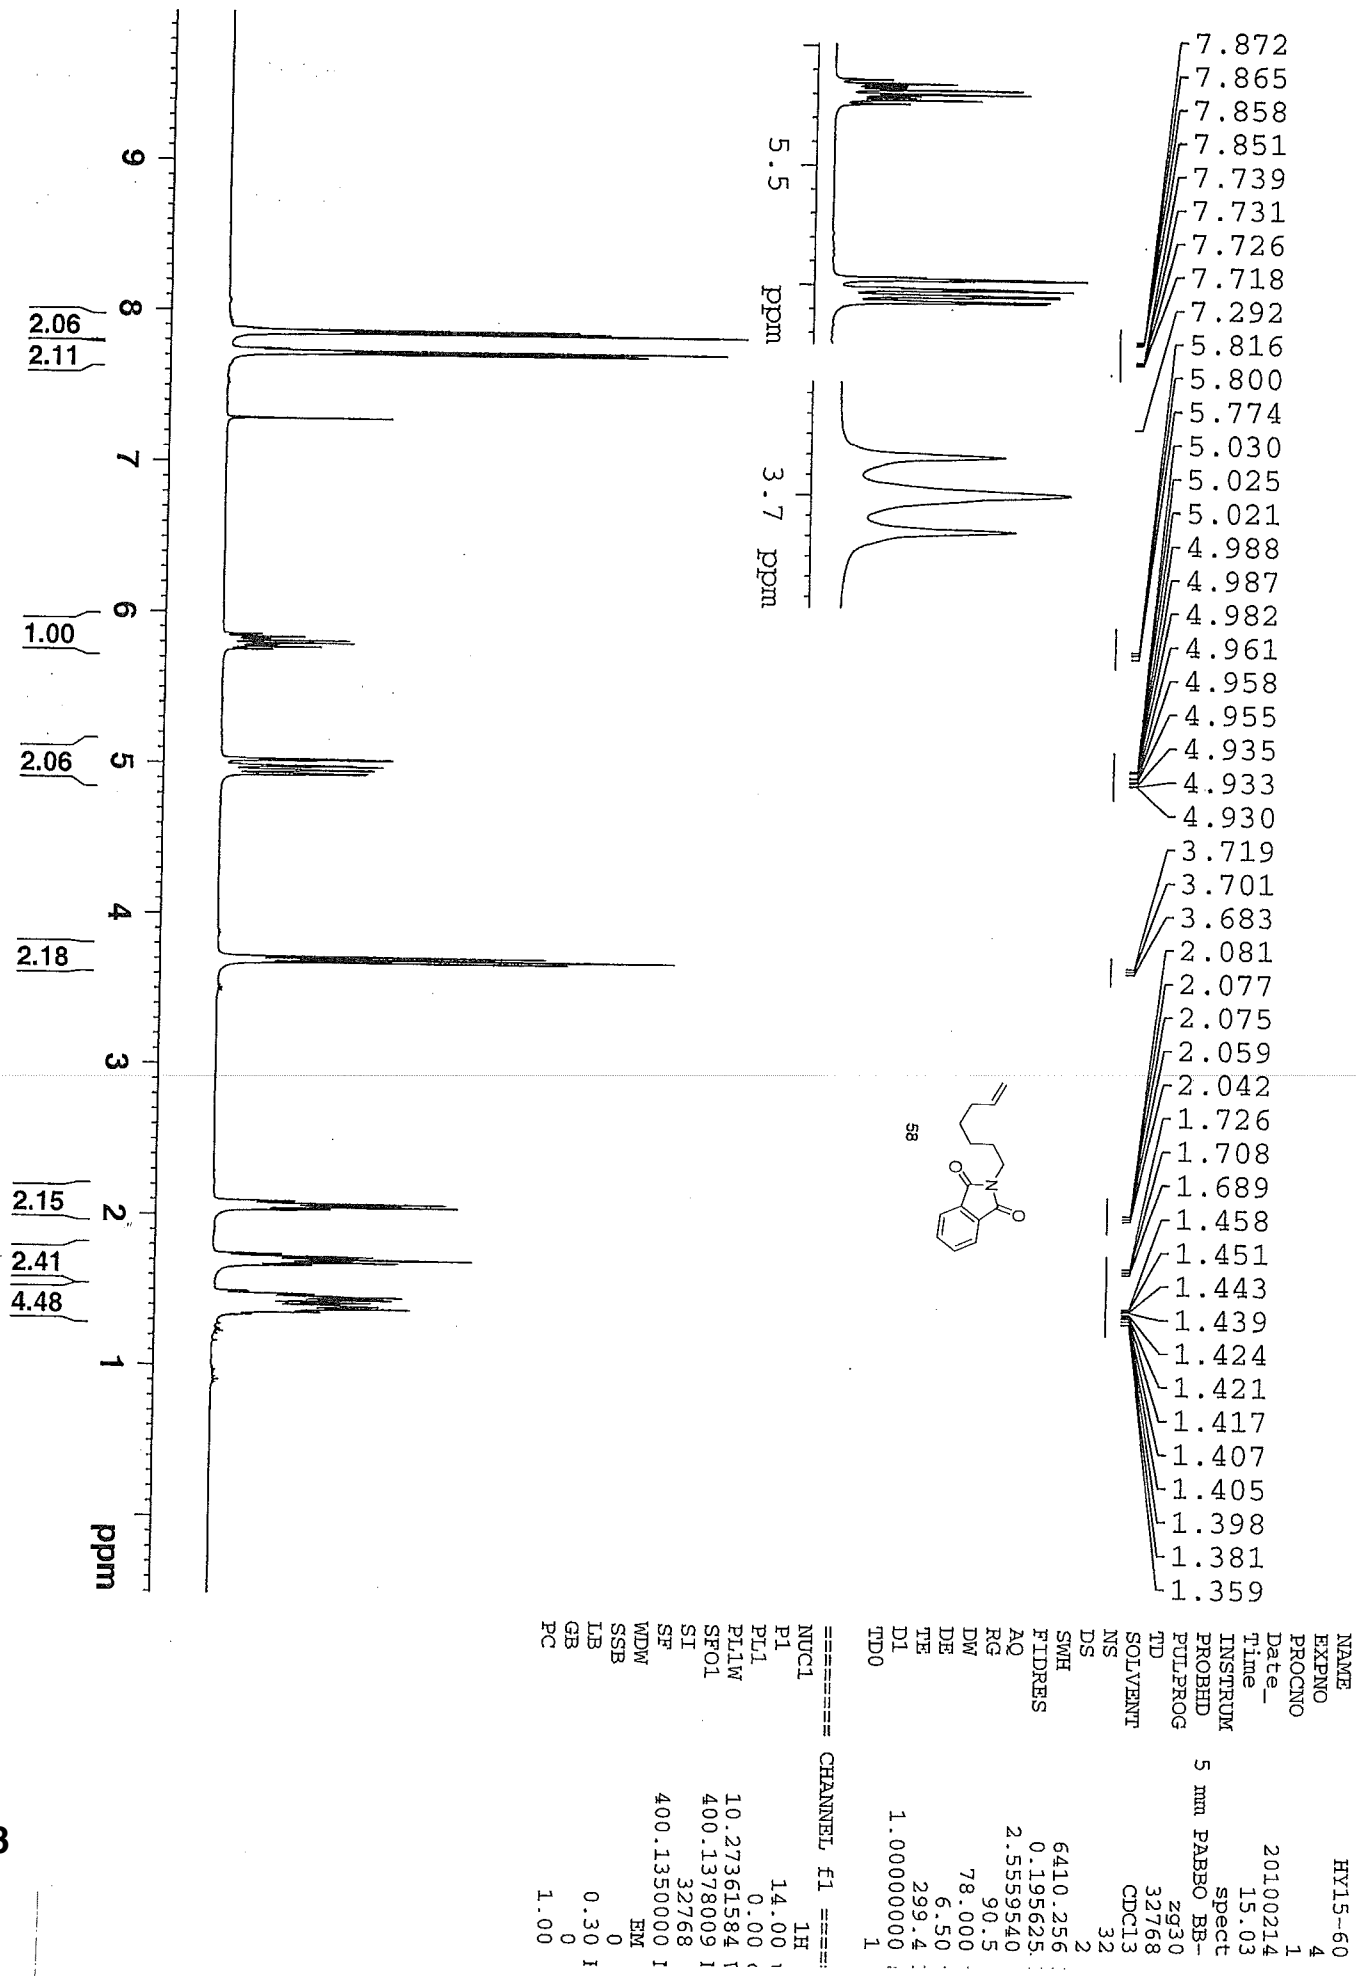

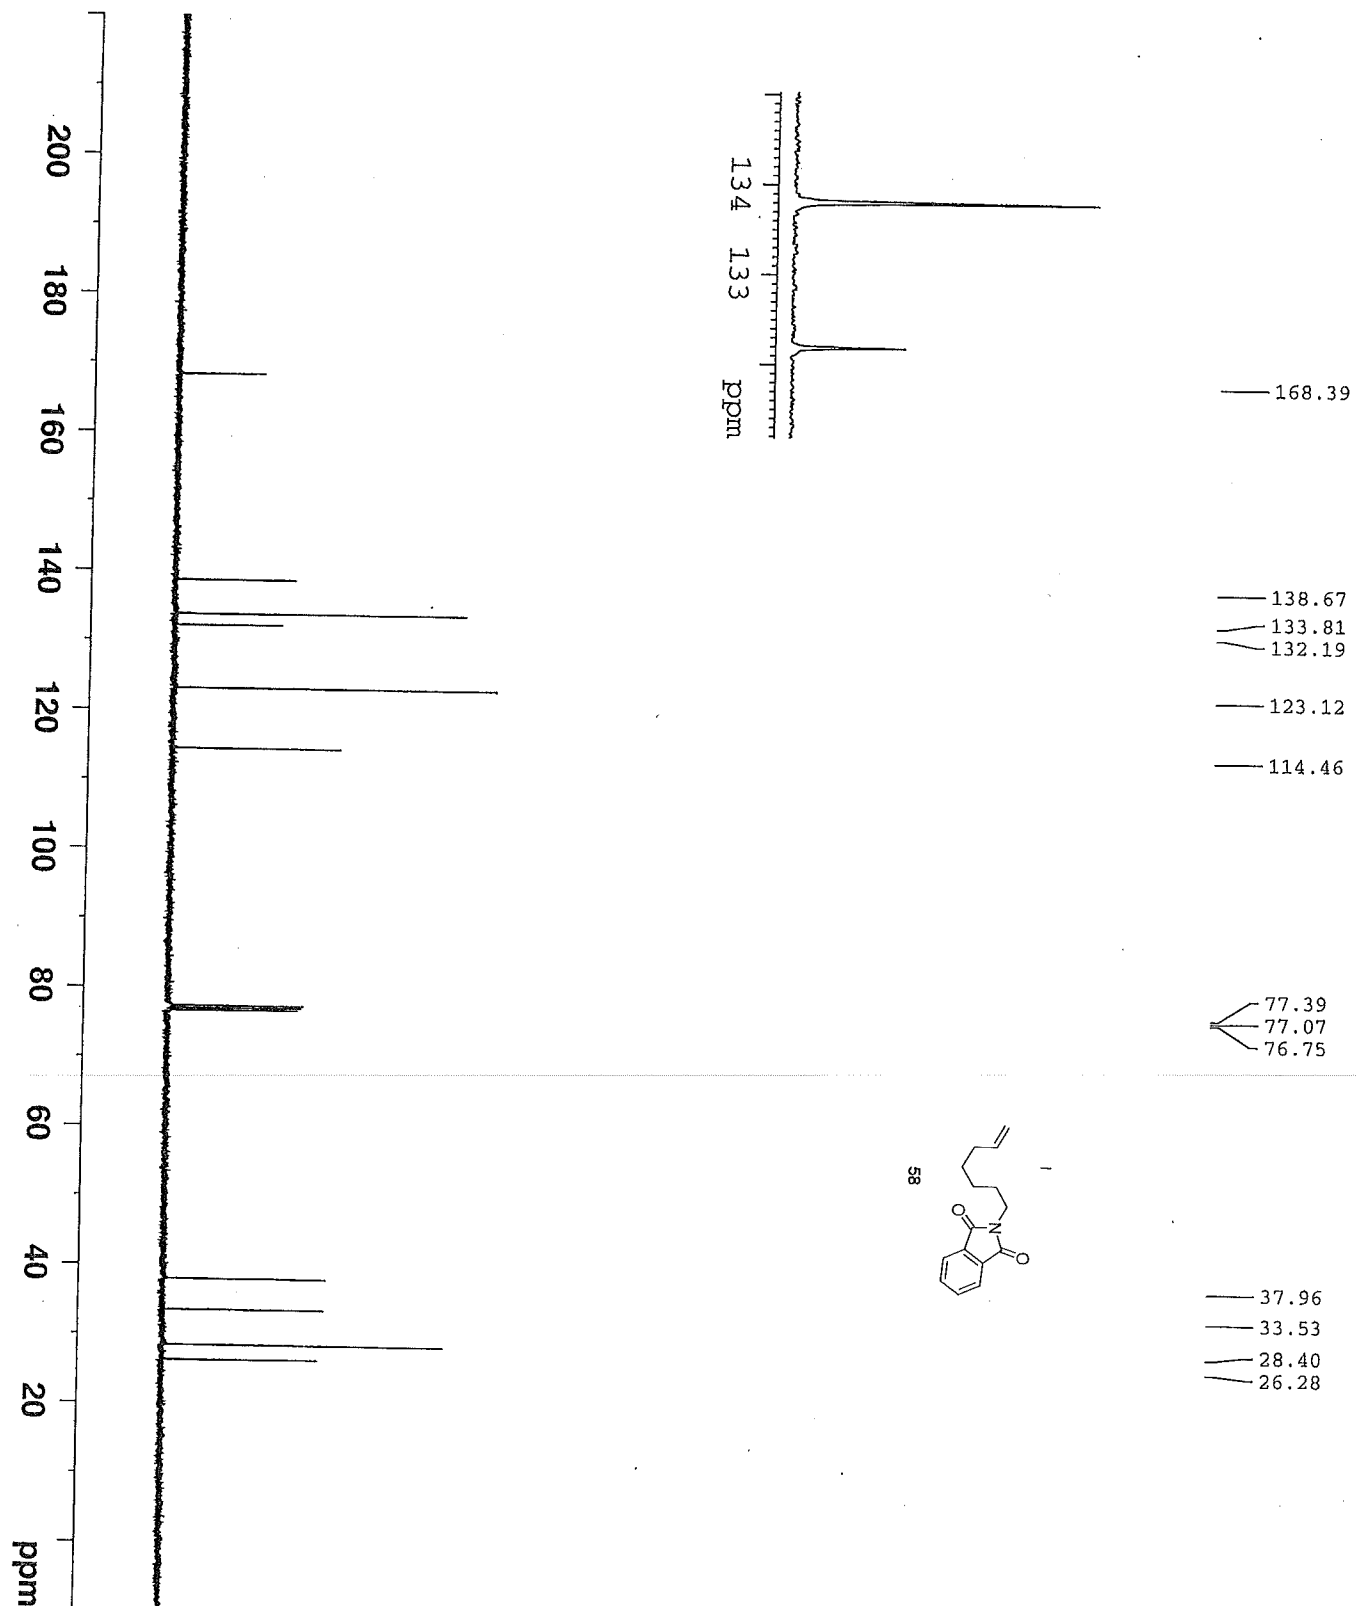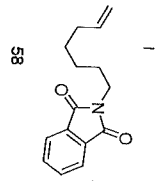

|                        |         |       |      |        |       |       |             |      |             |         |       |        |                |         |            |       |            |         |             |    |       |    |             |     |           |        |          |    |           |    |       |    |        |    |      |    |       |    |            |     |            |     |   |
|------------------------|---------|-------|------|--------|-------|-------|-------------|------|-------------|---------|-------|--------|----------------|---------|------------|-------|------------|---------|-------------|----|-------|----|-------------|-----|-----------|--------|----------|----|-----------|----|-------|----|--------|----|------|----|-------|----|------------|-----|------------|-----|---|
| NAME                   | HY15-60 | EXPNO | 3    | PROCNO | 1     | Date_ | 20100214    | Time | 14.57       | INSTRUM | spect | PROBHD | 5 mm PABBO BB- | PULPROG | zgpg30     | TD    | 65536      | SOLVENT | CDCl3       | NS | 57    | DS | 4           | SWH | 25125.629 | FIDRES | 0.383387 | AQ | 1.3042164 | RG | 16384 | DW | 19.900 | DE | 6.50 | TE | 300.3 | D1 | 2.00000000 | D11 | 0.03000000 | TDO | 1 |
| ===== CHANNEL f1 ===== |         |       |      |        |       |       |             |      |             |         |       |        |                |         |            |       |            |         |             |    |       |    |             |     |           |        |          |    |           |    |       |    |        |    |      |    |       |    |            |     |            |     |   |
| NUC1                   | 13C     | P1    | 9.00 | PL1    | -2.00 | PL1W  | 46.89702606 | SFO1 | 100.6255966 |         |       |        |                |         |            |       |            |         |             |    |       |    |             |     |           |        |          |    |           |    |       |    |        |    |      |    |       |    |            |     |            |     |   |
| ===== CHANNEL f2 ===== |         |       |      |        |       |       |             |      |             |         |       |        |                |         |            |       |            |         |             |    |       |    |             |     |           |        |          |    |           |    |       |    |        |    |      |    |       |    |            |     |            |     |   |
| CPDPRG2                | waltz16 | NUC2  | 1H   | PCPD2  | 90.00 | PL2   | 0.00        | PL12 | 16.16       | PL13    | 17.00 | PL2W   | 10.27361584    | PL12W   | 0.24872722 | PL13W | 0.20498557 | SFO2    | 400.1366005 | SI | 32768 | SF | 100.6140260 | WDW | EM        | SSB    | 0        | LB | 1.00      | GB | 0     | PC | 1.40   |    |      |    |       |    |            |     |            |     |   |



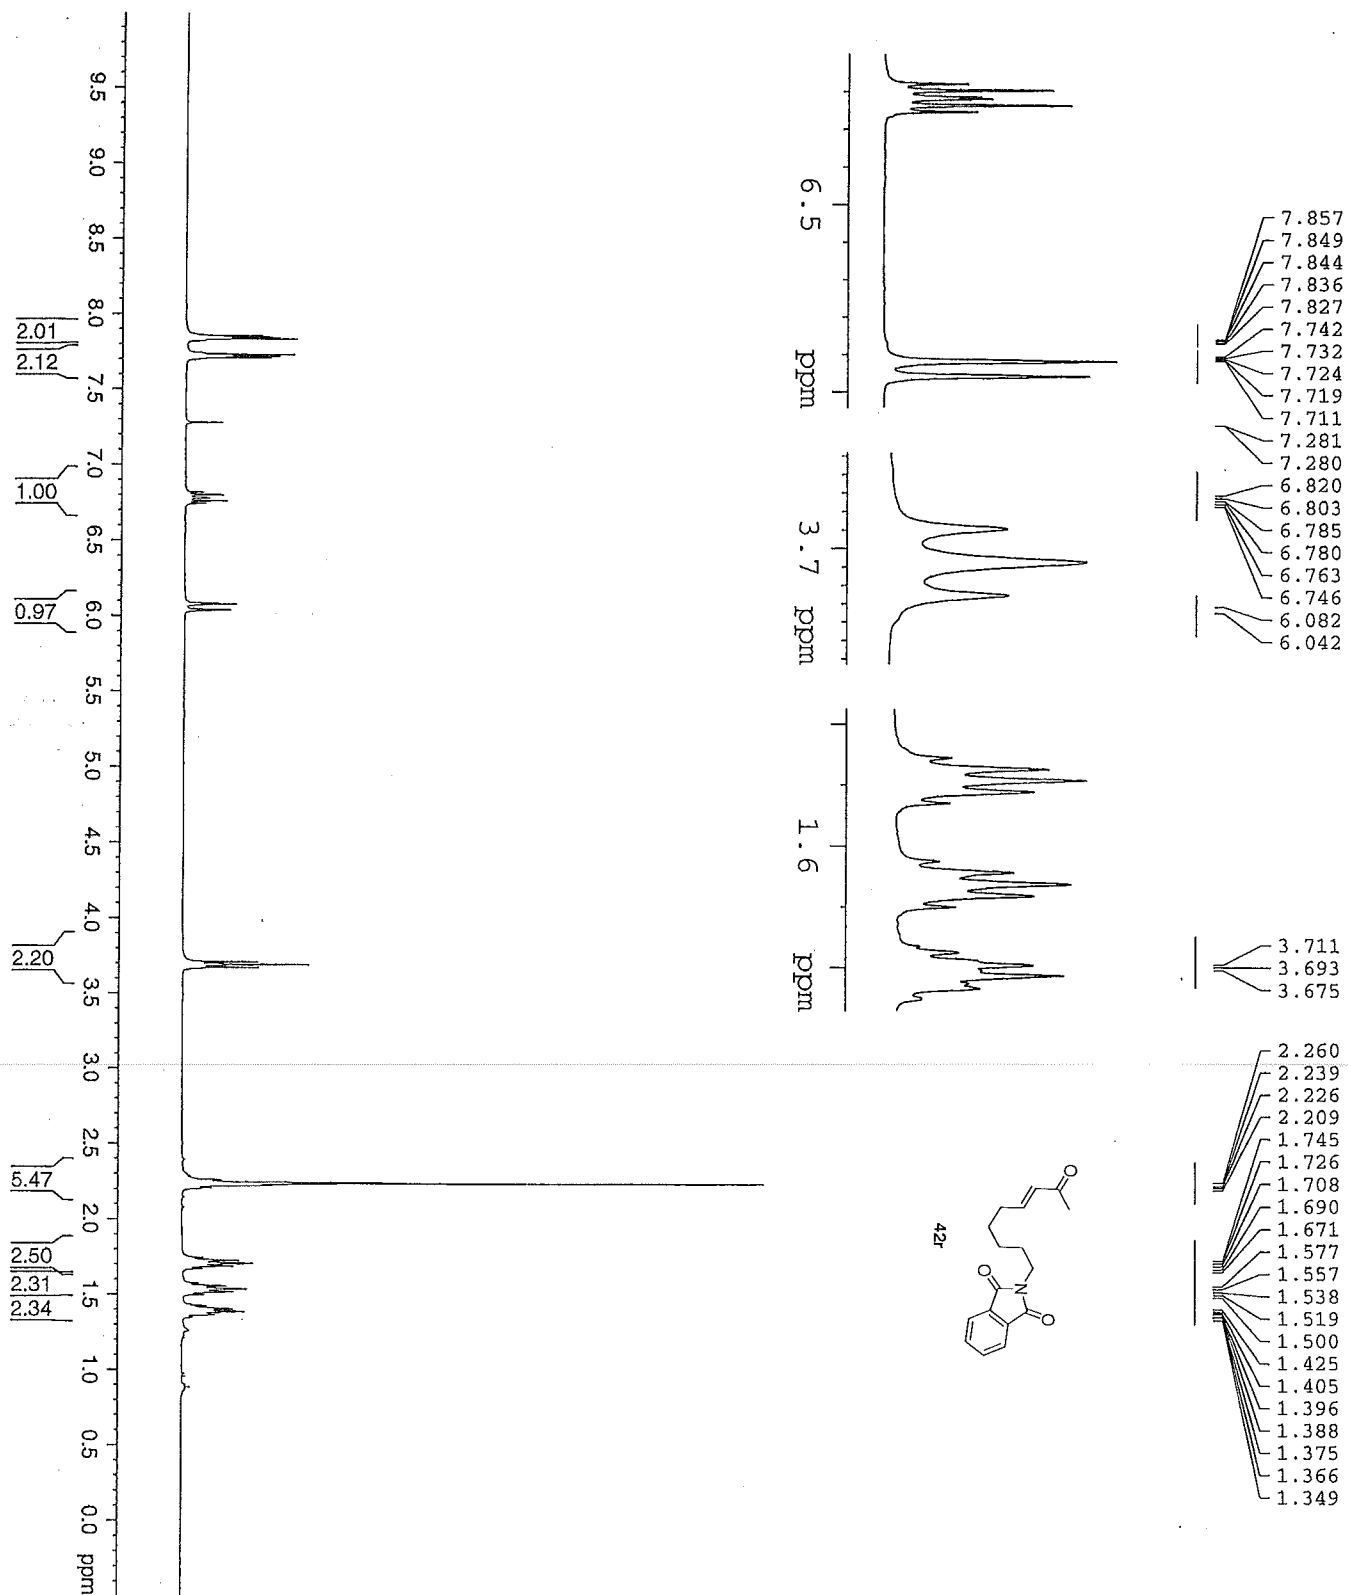

Current Data Parameters  
NAME HYL5-61  
EXPNO 1  
PROCNO 1  
DU /m  
USMR Hua

F2 - Acquisition Parameters  
Date\_ 20100215  
Time 15.06  
INSTRUM DEX400  
PROBHD 5 mm BBO BB-1H  
PULPROG zg30  
TD 32768  
SOLVENT CDCl3  
NS 32  
DS 2  
SWH 6410.256 Hz  
FIDRES 0.195625 Hz  
AQ 2.5559540 sec  
RG 181  
DW 78.000 usec  
DE 6.00 usec  
TE 298.2 K  
D1 1.0000000 sec  
TD0 1

===== CHANNEL f1 =====  
NUC1 1H  
P1 13.50 usec  
PL1 -3.00 dB  
SFO1 400.2478017 MHz

F2 - Processing parameters  
SI 32768  
SF 400.2450000 MHz  
WDW EM  
SSB 0  
LB 0.30 Hz  
GB 0  
PC 1.00

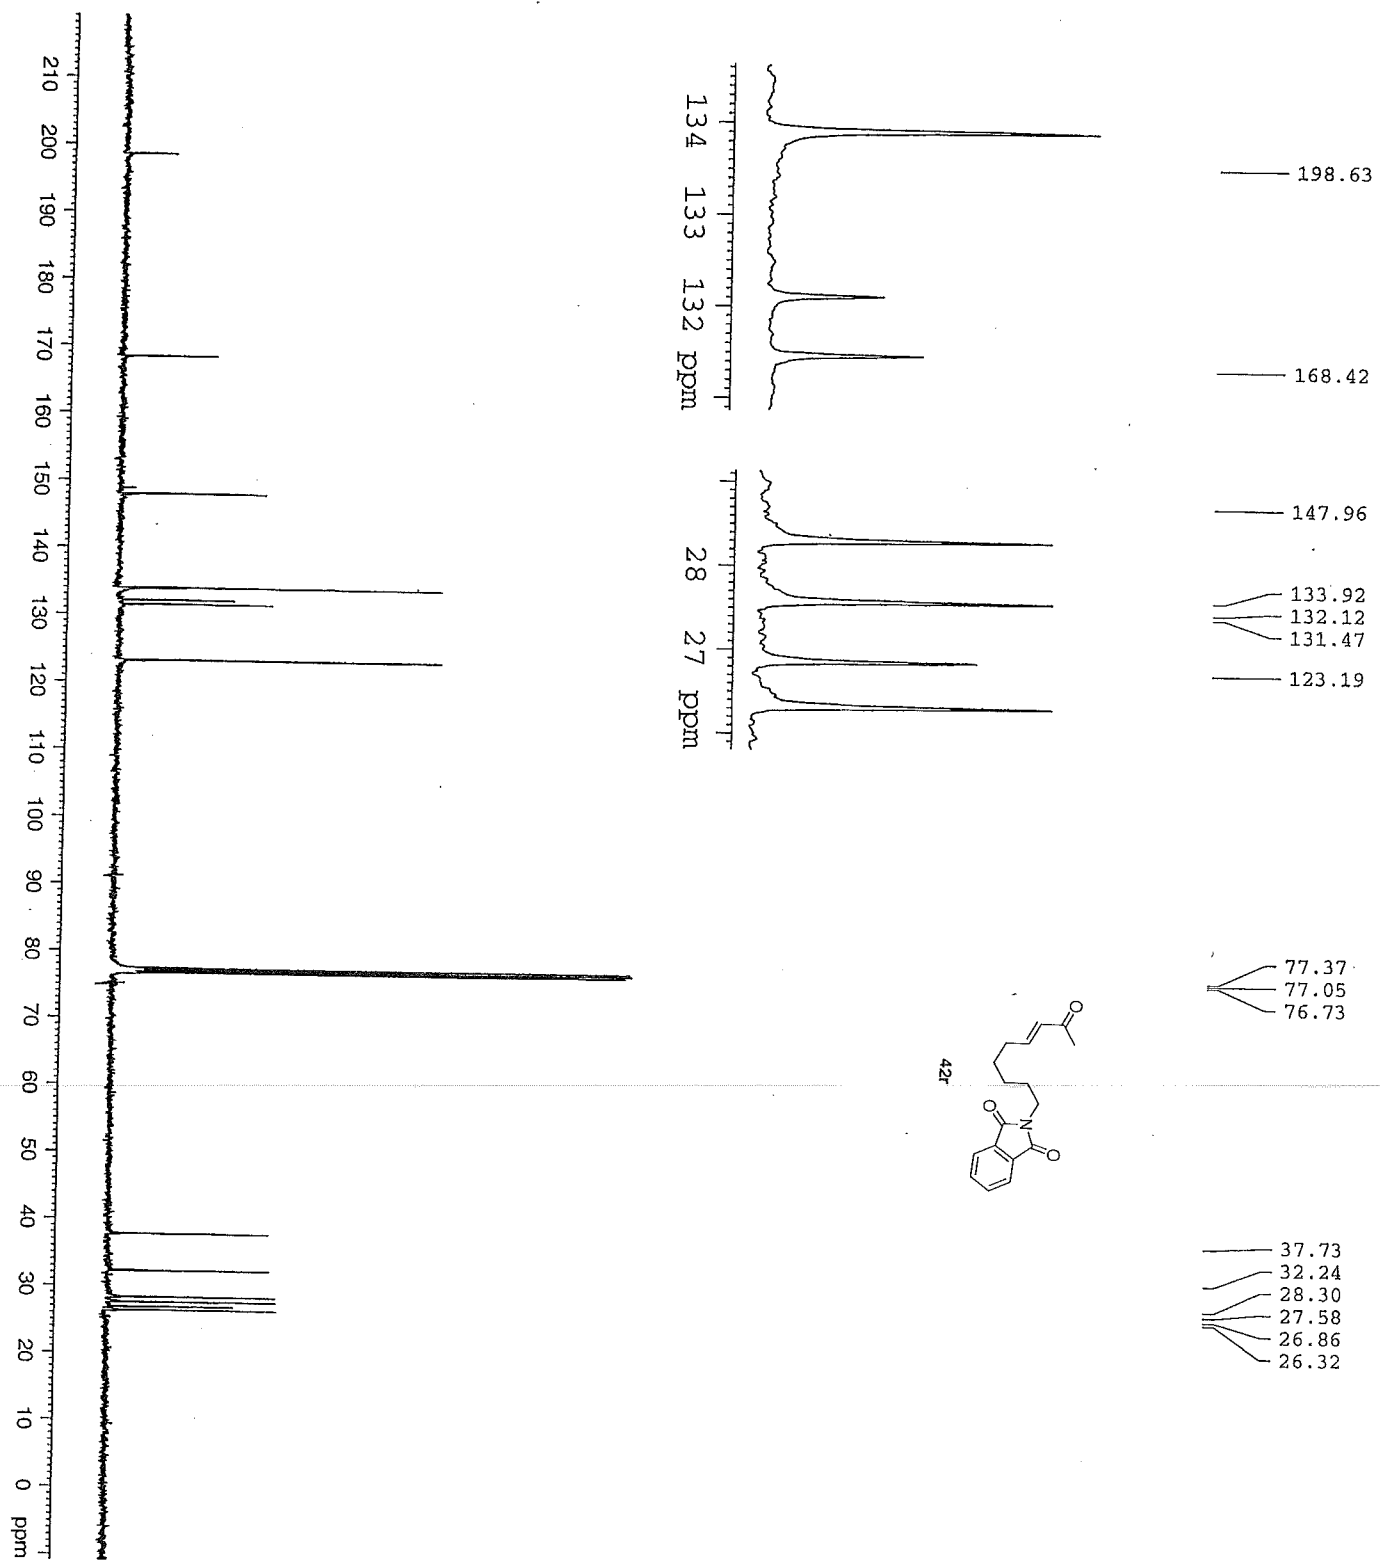

Current Data Parameters  
NAME HX15-61  
EXPNO 2  
PROCNO 1  
DO /m  
USER Hua

F2 - Acquisition Parameters  
Date\_ 20100215  
Time 15.12  
INSTRUM DECA00  
PROBHD 5 mm BBO BB-1H  
PULPROG zgpg30  
TD 65536  
FIDRES 0.365918 Hz  
SOLVENT CDCl3  
NS 736  
DS 4  
SWH 23980.814 Hz  
FIDRES 0.365918 Hz  
AQ 1.3664756 sec  
RG 6502  
RW 20.850 usec  
DE 6.00 usec  
TE 298.2 K  
D1 2.00000000 sec  
d11 0.03000000 sec  
DELTA 1.89999998 sec  
TD0 1

===== CHANNEL f1 =====  
NUC1 13C  
P1 8.30 usec  
PL1 -3.00 dB  
SFO1 100.6517495 MHz

===== CHANNEL f2 =====  
CPDPRG2 waltz16  
NUC2 1H  
PCPD2 90.00 usec  
PL2 13.00 dB  
PL12 15.00 dB  
PL13 15.00 dB  
SFO2 400.2468010 MHz

F2 - Processing parameters  
SI 32768  
SF 100.6416850 MHz  
WDW EM  
SSB 0  
LB 3.00 Hz  
GB 0  
PC 1.40

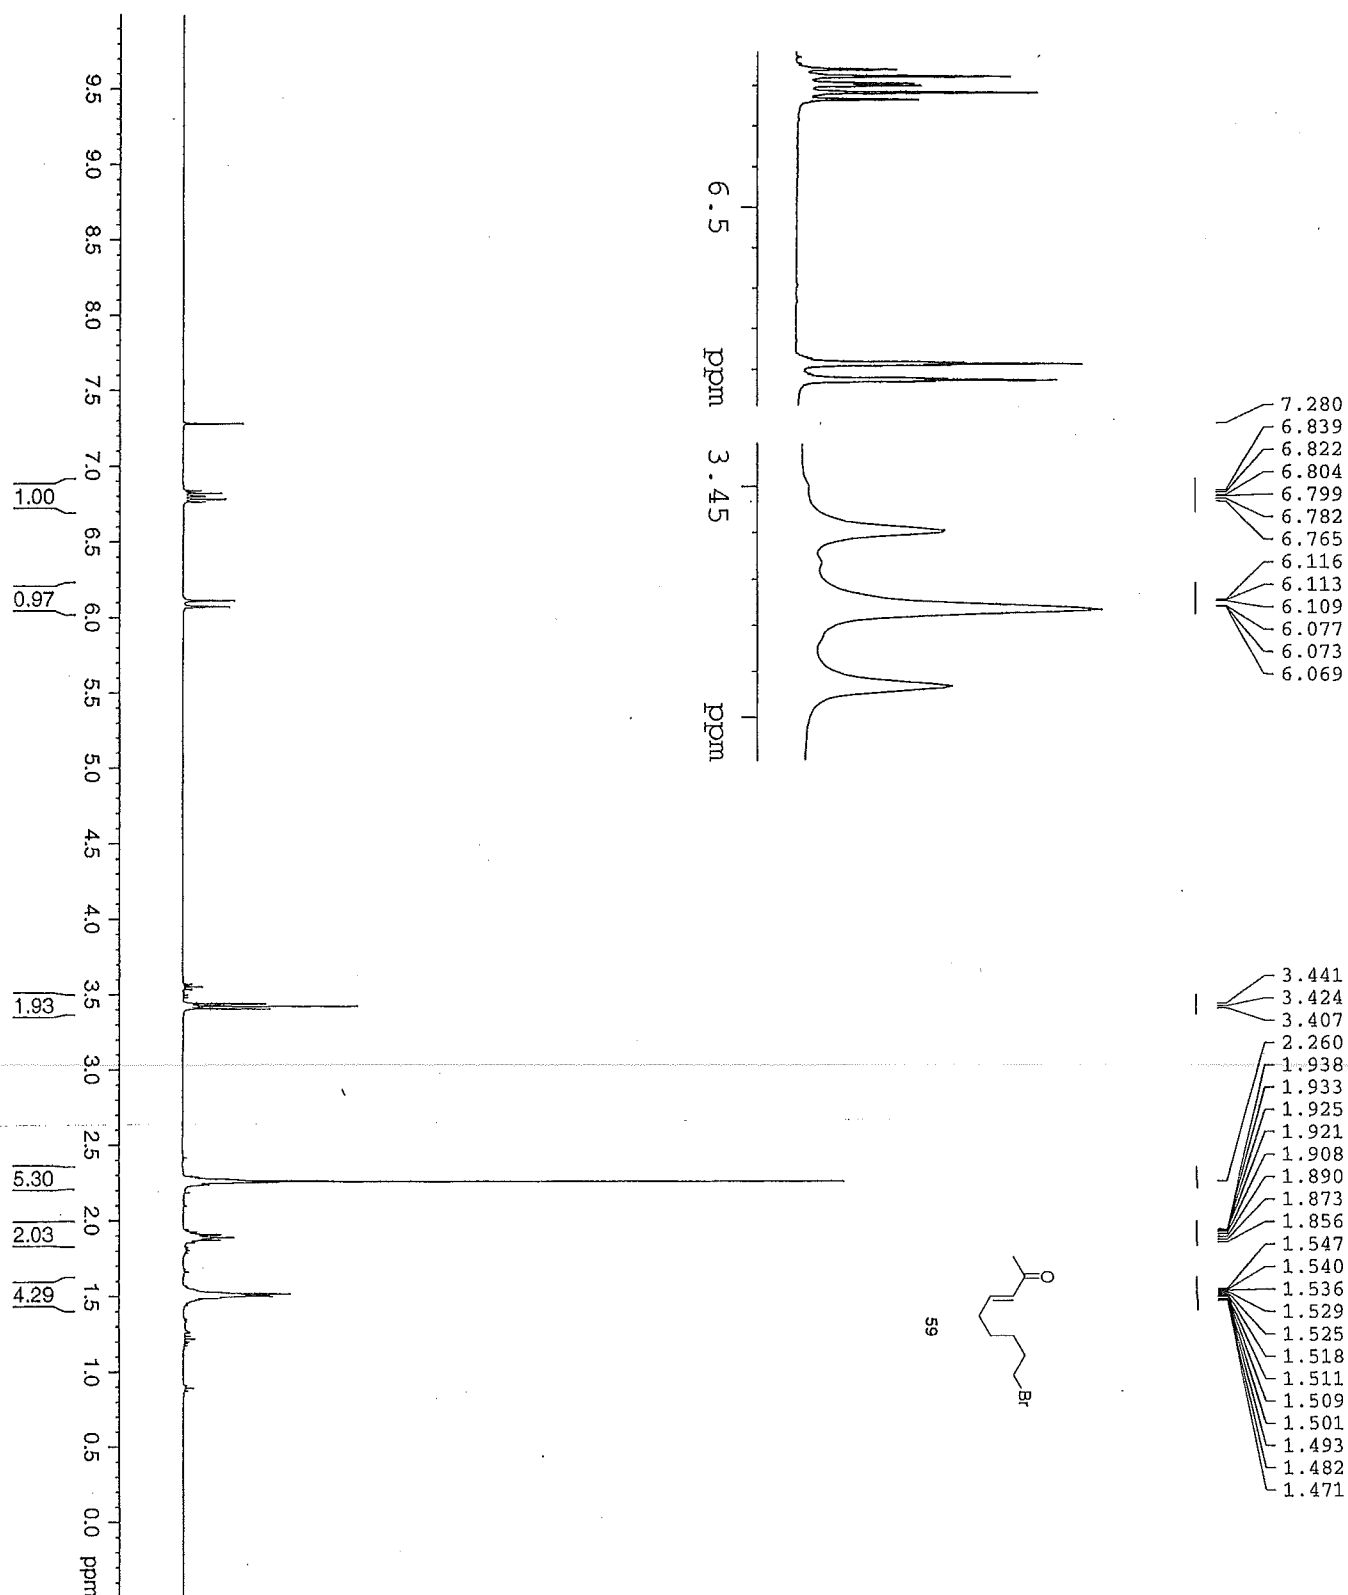

Current Data Parameters  
NAME HYL4-85  
EXPNO 3  
PROCNO 1  
PU /m  
USER Hua

F2 - Acquisition Parameters  
Date\_ 20091206  
Time 20.30  
INSTRUM DPX400  
PROBHD 5 mm BBO BB-1H  
PULPROG zg30  
TD 65536  
FIDRES 0.195625 Hz  
AQ 2.5559540 sec  
RG 203.2  
DW 78.000 usec  
DE 6.00 usec  
TE 295.2 K  
D1 1.00000000 sec  
TD0 1

===== CHANNEL f1 =====  
NUC1 1H  
P1 13.50 usec  
PL -3.00 dB  
SFO1 400.2478017 MHz

F2 - Processing parameters  
SI 32768  
SF 400.2450000 MHz  
WDW EM  
SSB 0  
GB 0  
PC 1.00

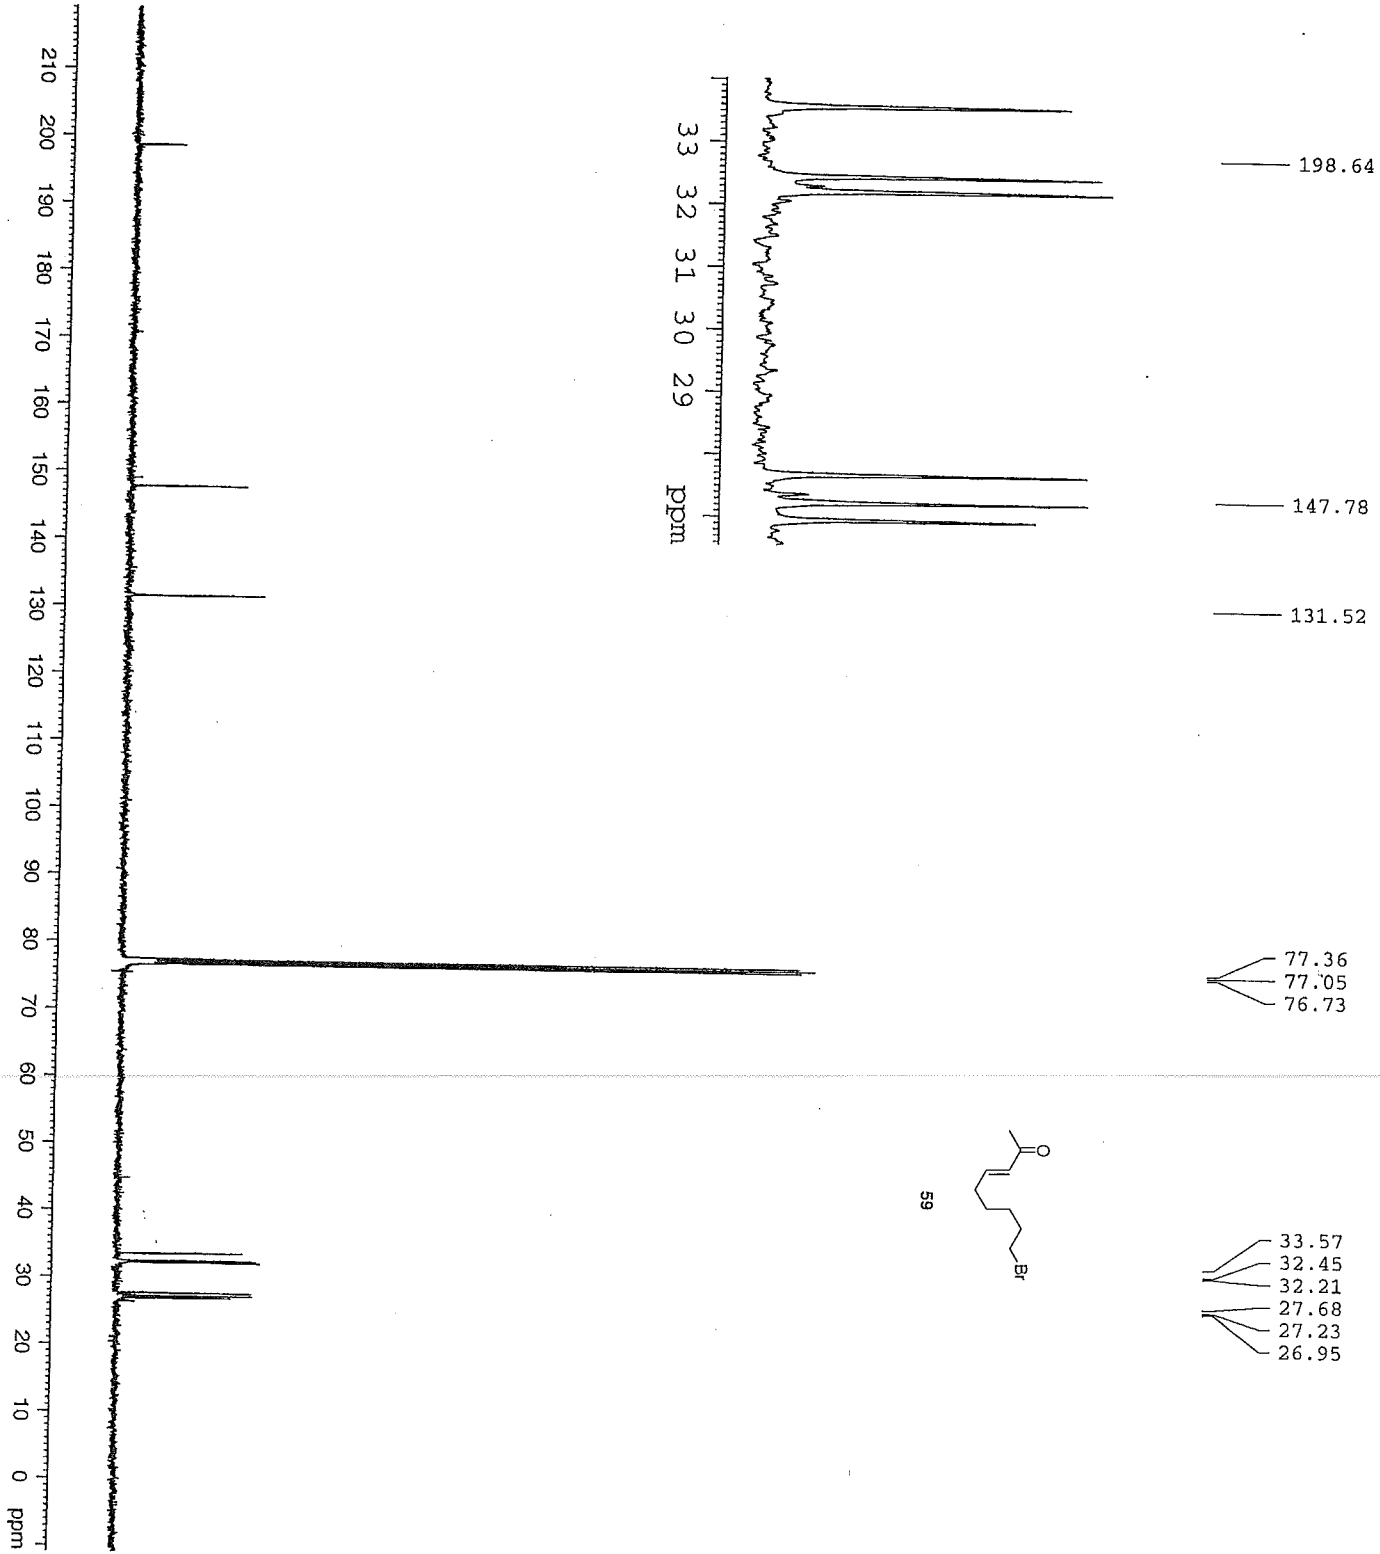

Current Data Parameters  
NAME HYL4-85  
EXNO 4  
PROCNO 1  
DO /m  
USER Hua

F2 - Acquisition Parameters  
Date\_ 20091206  
Time 20.36  
INSTRUM DPK400  
PROBHD 5 mm BBO BB-1H  
PULPROG zgpg30  
TD 65536  
SOLVENT CDCl3  
NS 620  
DS 4  
SWH 23980.814 Hz  
FIDRES 0.365918 Hz  
AQ 1.3664756 sec  
RG 6502  
DM 20.850 usec  
DE 6.00 usec  
TE 296.2 K  
D1 2.00000000 sec  
d11 0.03000000 sec  
DELTA 1.89999998 sec  
TD0 1

===== CHANNEL f1 =====  
NUC1 13C  
P1 8.30 usec  
PL1 -3.00 dB  
SFO1 100.6517495 MHz

===== CHANNEL f2 =====  
CPDPRG2 waltz216  
NUC2 1H  
PCPD2 90.00 usec  
PL2 -3.00 dB  
PL3 15.00 dB  
PL4 15.00 dB  
SFO2 400.2466010 MHz

F2 - Processing parameters  
SI 32768  
SF 100.6416850 MHz  
WDW EM  
SSB 0  
LB 3.00 Hz  
GB 0  
PC 1.40

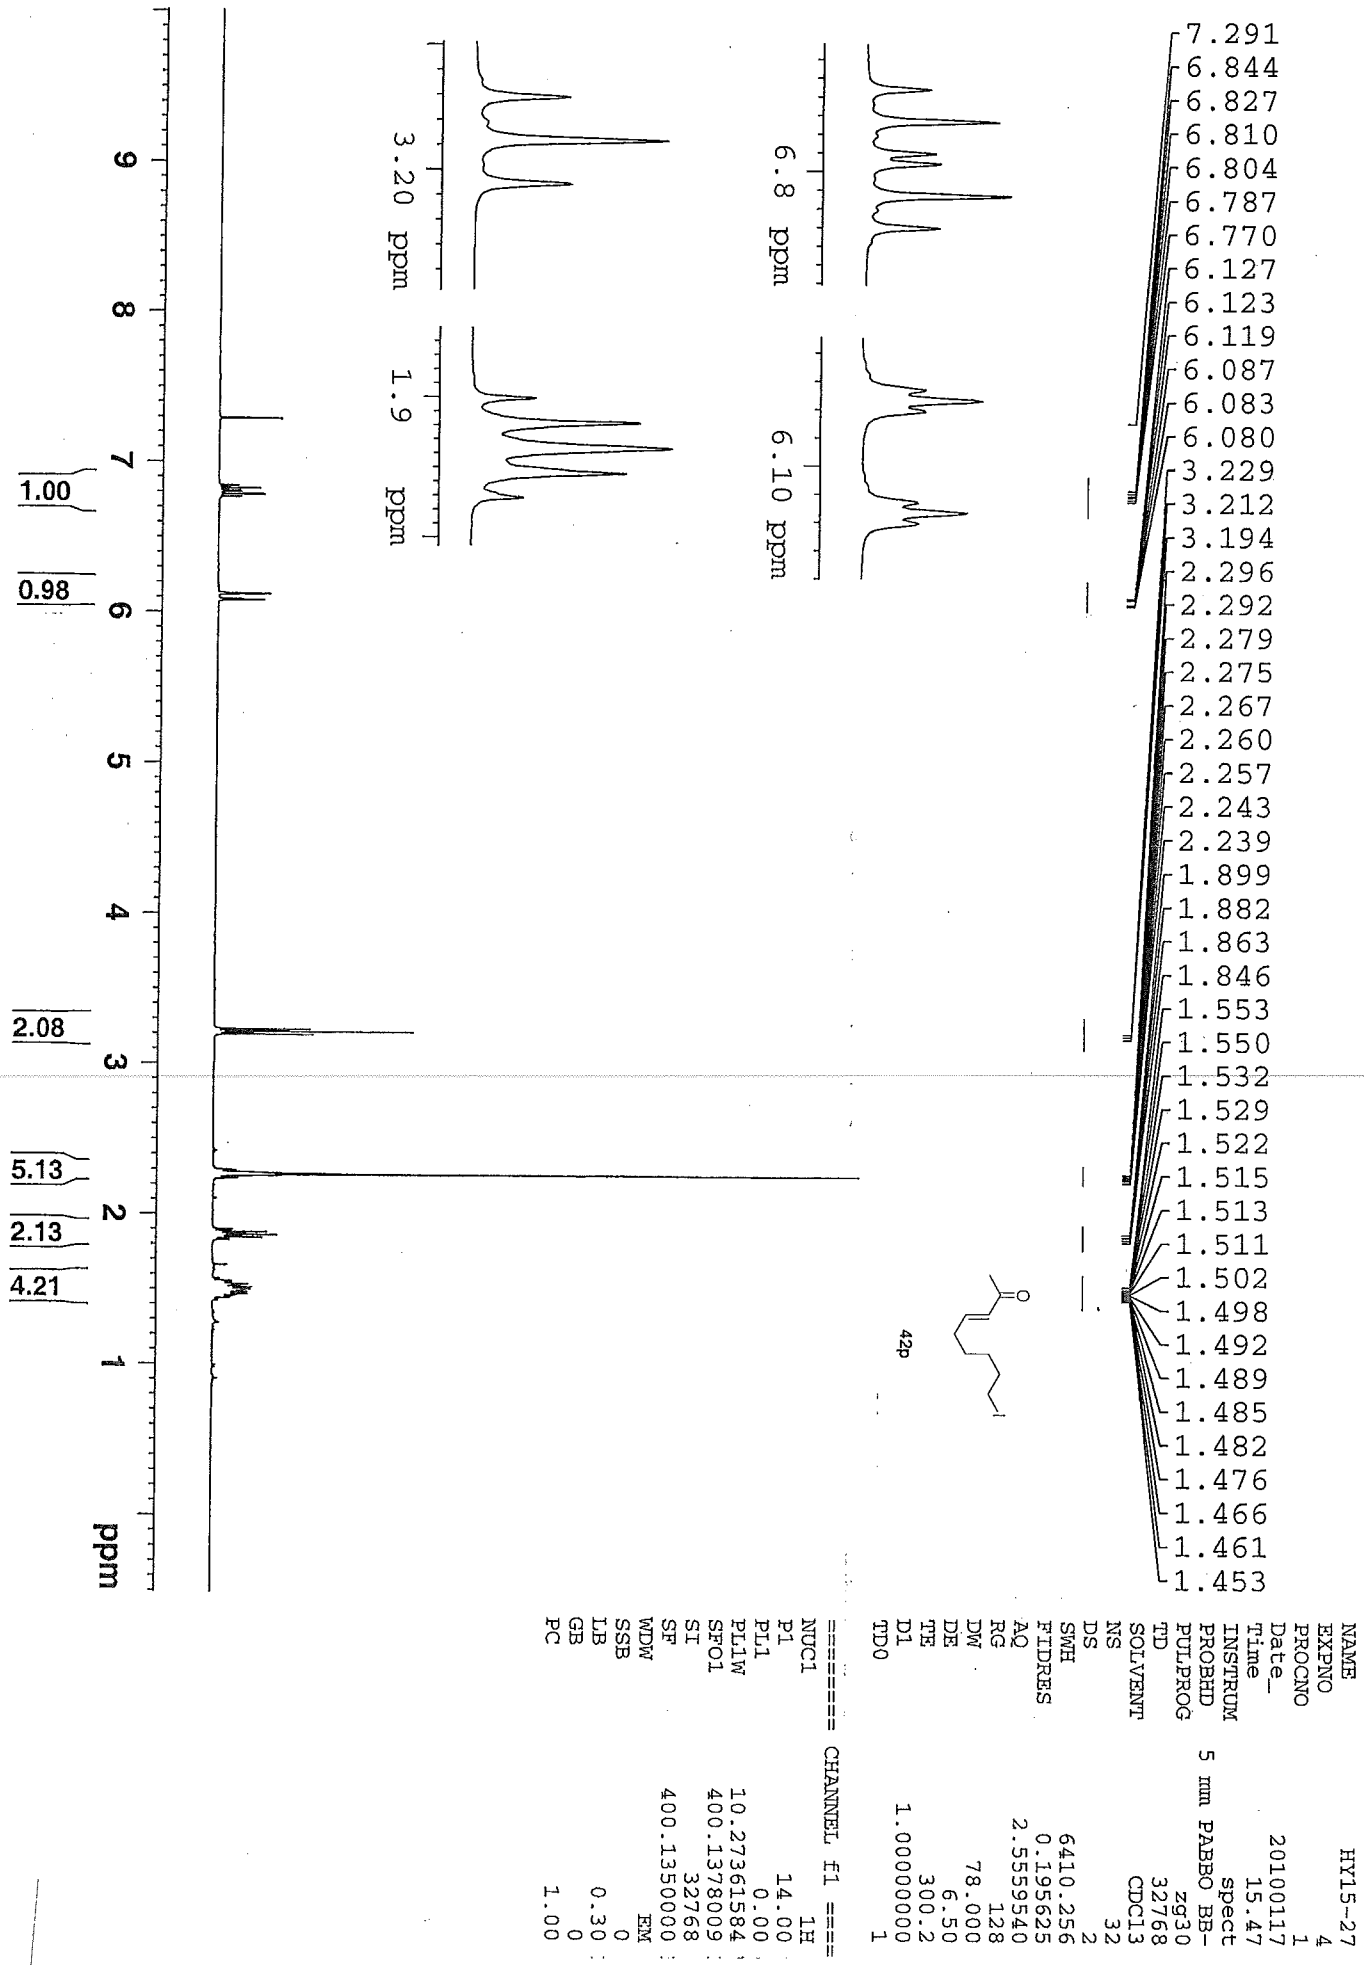

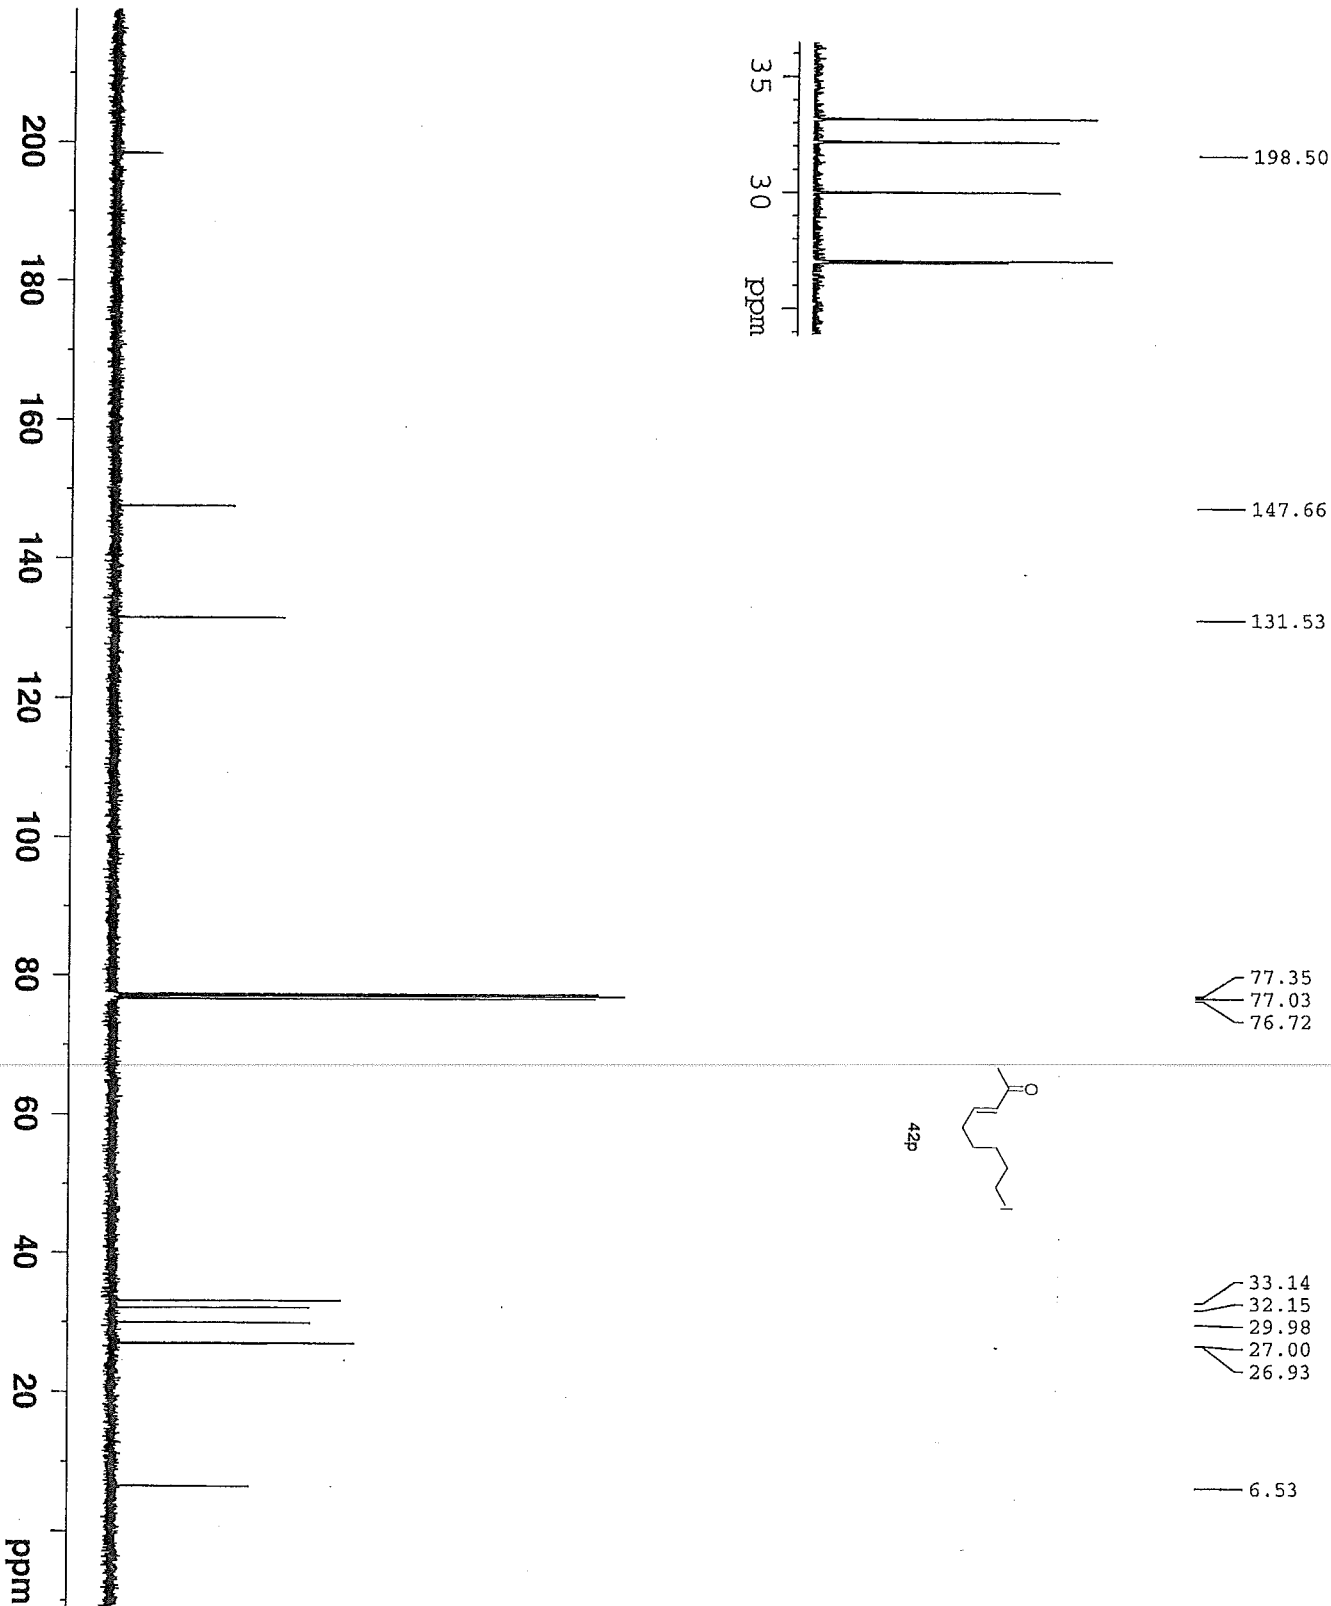

|         |                |
|---------|----------------|
| NAME    | HY15-27        |
| EXPNO   | 6              |
| PROCNO  | 1              |
| Date_   | 20100117       |
| time    | 15.55          |
| INSTRUM | spect          |
| PROBHD  | 5 mm PABBO BB- |
| PULPROG | zgpg30         |
| TD      | 65536          |
| SOLVENT | CDCl3          |
| NS      | 195            |
| DS      | 4              |
| SWH     | 23980.814      |
| FIDRES  | 0.365918       |
| AQ      | 1.3664756      |
| RG      | 16384          |
| DW      | 20.850         |
| DE      | 6.50           |
| TE      | 301.4          |
| D1      | 2.00000000     |
| D1.1    | 0.03000000     |
| TD0     | 1              |

  

|                        |             |
|------------------------|-------------|
| ===== CHANNEL f1 ===== |             |
| NUC1                   | 13C         |
| P1                     | 9.00        |
| PL1                    | -2.00       |
| PL1W                   | 46.89702606 |
| SFO1                   | 100.6240872 |

  

|                        |             |
|------------------------|-------------|
| ===== CHANNEL f2 ===== |             |
| CPDPRG2                | waltz16     |
| NUC2                   | 1H          |
| PCPD2                  | 90.00       |
| PL2                    | 0.00        |
| PL12                   | 16.16       |
| PL13                   | 17.00       |
| PL2W                   | 10.27361584 |
| PL12W                  | 0.24872722  |
| PL13W                  | 0.20498557  |
| SFO2                   | 400.1366005 |
| SI                     | 32768       |
| SF                     | 100.6140260 |
| WDW                    | EM          |
| SSB                    | 0           |
| LB                     | 1.00        |
| GB                     | 0           |
| PC                     | 1.40        |

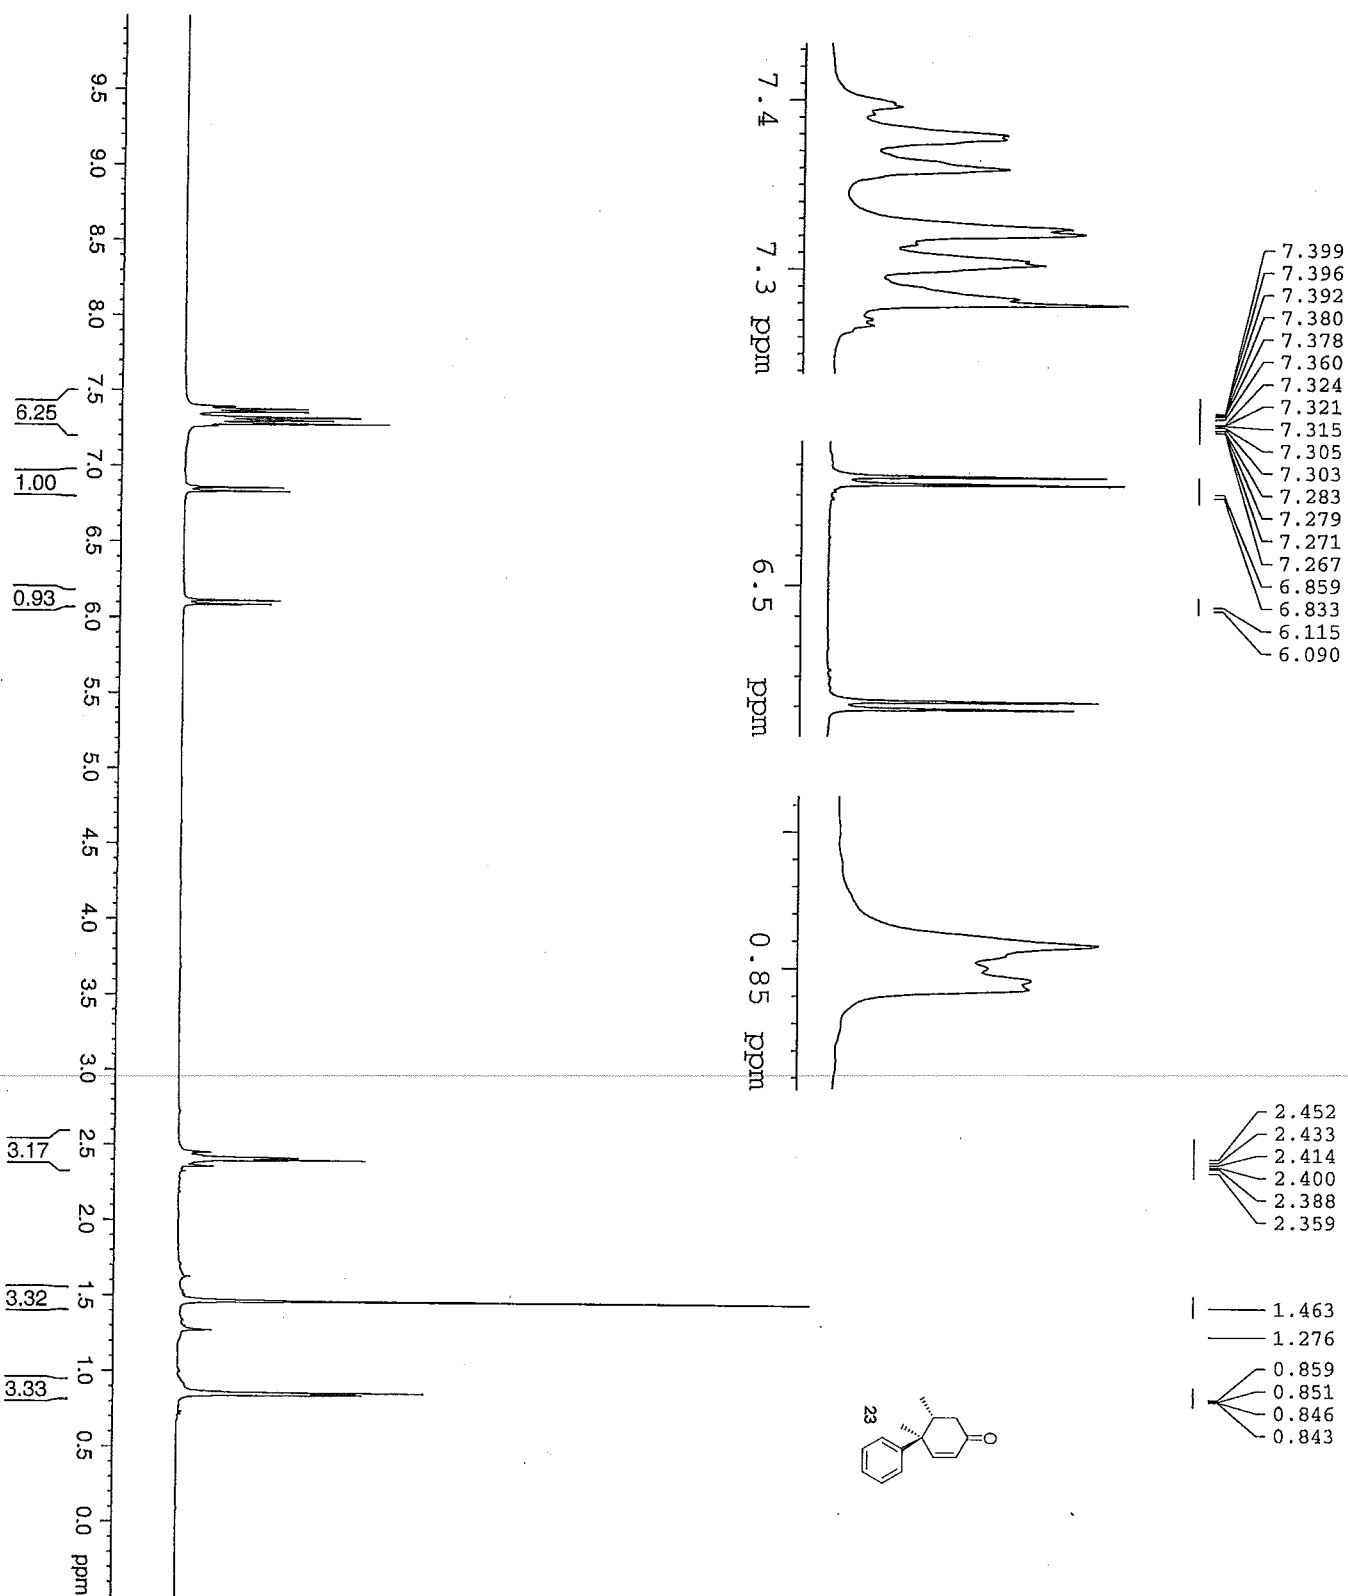

Current Data Parameters  
NAME HYL3-78  
EXPNO 2  
PROCNO 1  
F2 - Acquisition Parameters  
Date\_ 20091008  
Time 22:33  
INSTRUM DPX400  
PROBHD 5 mm BBO BB-1H  
PULPROG zgpg30  
TD 65536  
SOLVENT CDCl3  
NS 2  
DS 2  
SWH 6410.256 Hz  
FIDRES 0.195625 Hz  
AQ 2.555540 sec  
RG 406.4  
DW 78.000 usec  
DE 6.00 usec  
TE 299.2 K  
D1 1.00000000 sec  
TDO 1  
===== CHANNEL f1 =====  
NUC1 1H  
P1 13.50 usec  
PL1 -3.00 dB  
SFO1 400.2478017 MHz  
F2 - Processing parameters  
SI 32768  
SF 400.2450000 MHz  
WDW EM  
SSB 0  
LB 0.30 Hz  
GB 0  
PC 1.00

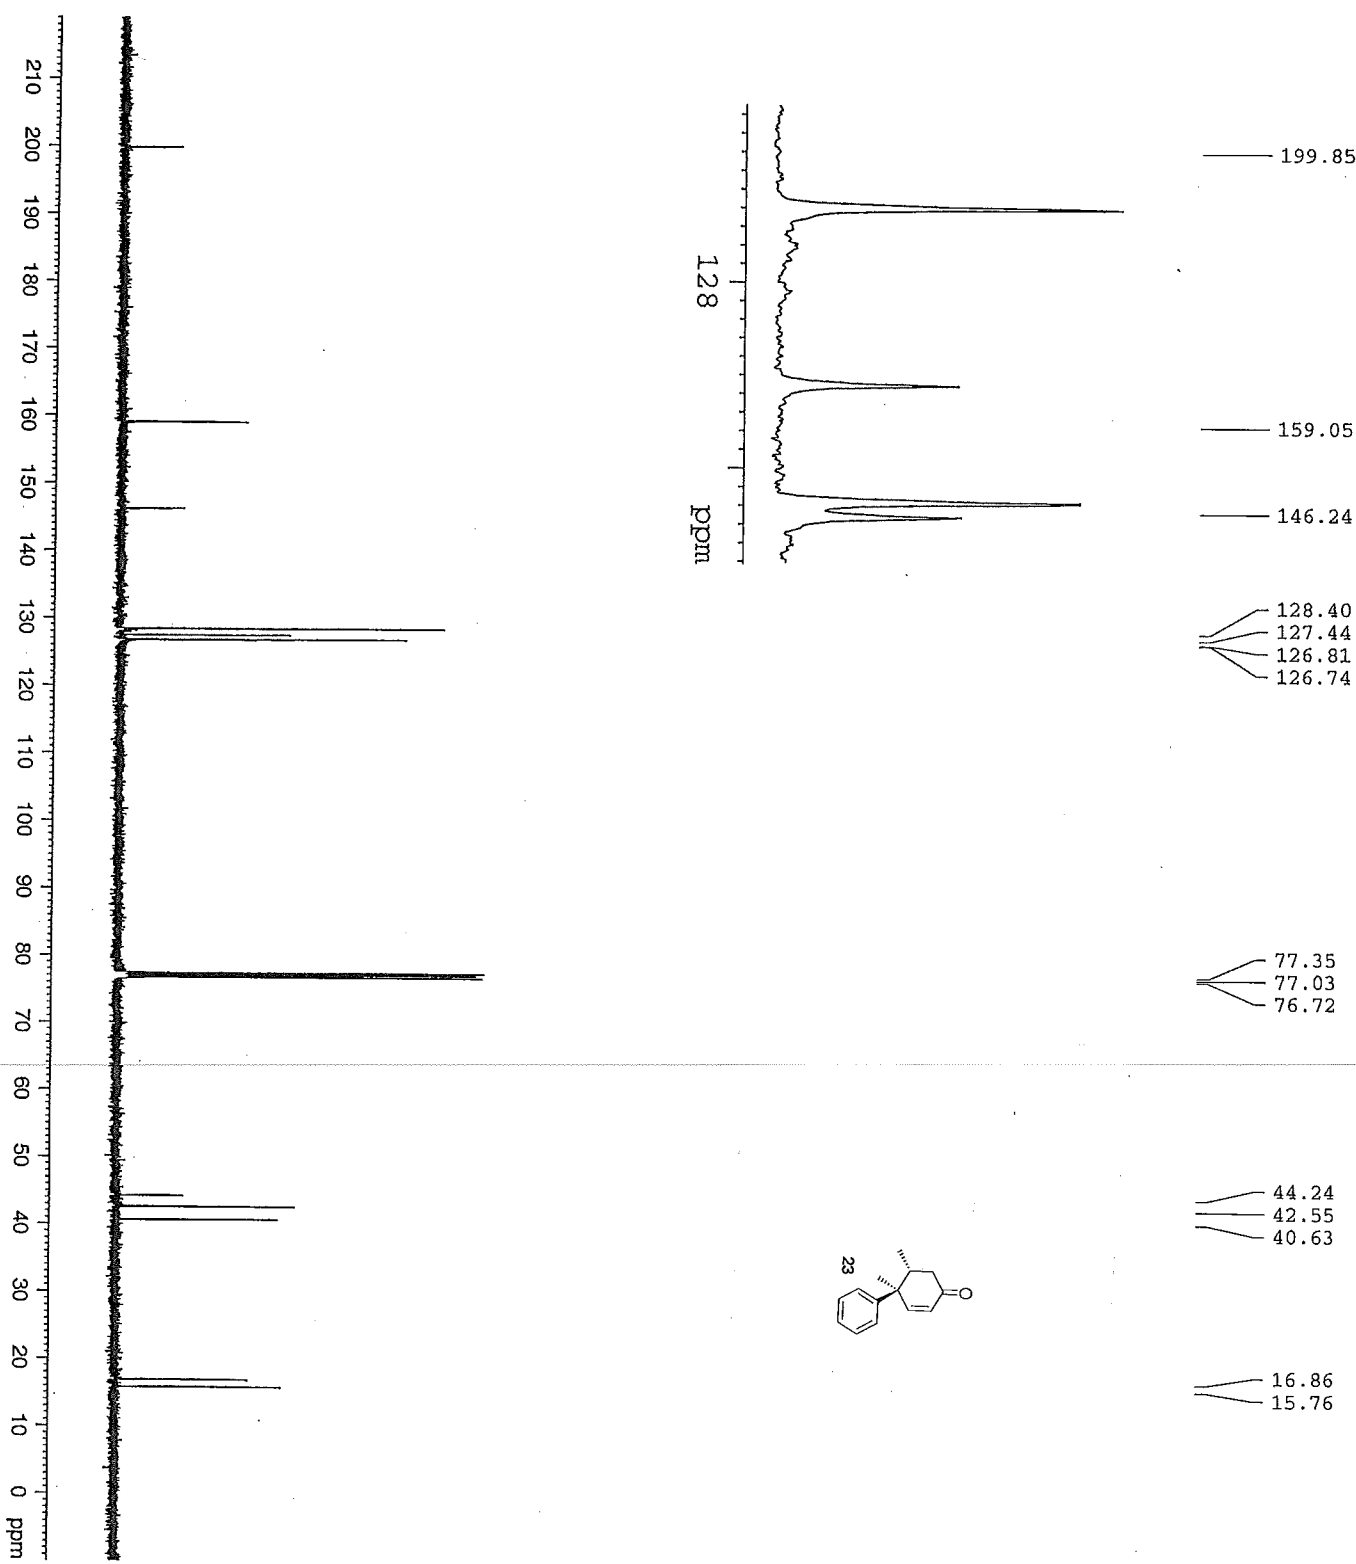

Current Data Parameters  
NAME HYL3-68  
EXPNO 3  
PROCNO 1  
DT 1 /m  
USER Hua

F2 - Acquisition Parameters  
Date\_ 20090911  
Time 20.55  
INSTRUM DPK400  
PROBHD 5 mm BBO BB-1H  
PULPROG zgpg30  
TD 65536  
SOLVENT CDCl3  
NS 374  
DS 4  
SWH 23980.814 Hz  
FIDRES 0.365918 Hz  
AQ 1.3664756 sec  
RG 18390.4  
DW 20.850 usec  
DE 6.00 usec  
TE 300.2 K  
D1 2.00000000 sec  
d11 0.03000000 sec  
DELTA 1.89999998 sec  
TD0 1

===== CHANNEL f1 =====  
NUC1 13C  
P1 8.30 usec  
PL1 -3.00 dB  
SFO1 100.6504921 MHz

===== CHANNEL f2 =====  
CPDPRG2 waltz16  
NUC2 1H  
PCPD2 90.00 usec  
PL2 -3.00 dB  
PL12 15.00 dB  
PL13 15.00 dB  
SFO2 400.2416010 MHz

F2 - Processing parameters  
SI 32768  
SF 100.6404280 MHz  
WDW EM  
SSB 0  
LB 1.00 Hz  
GB 0  
PC 1.40



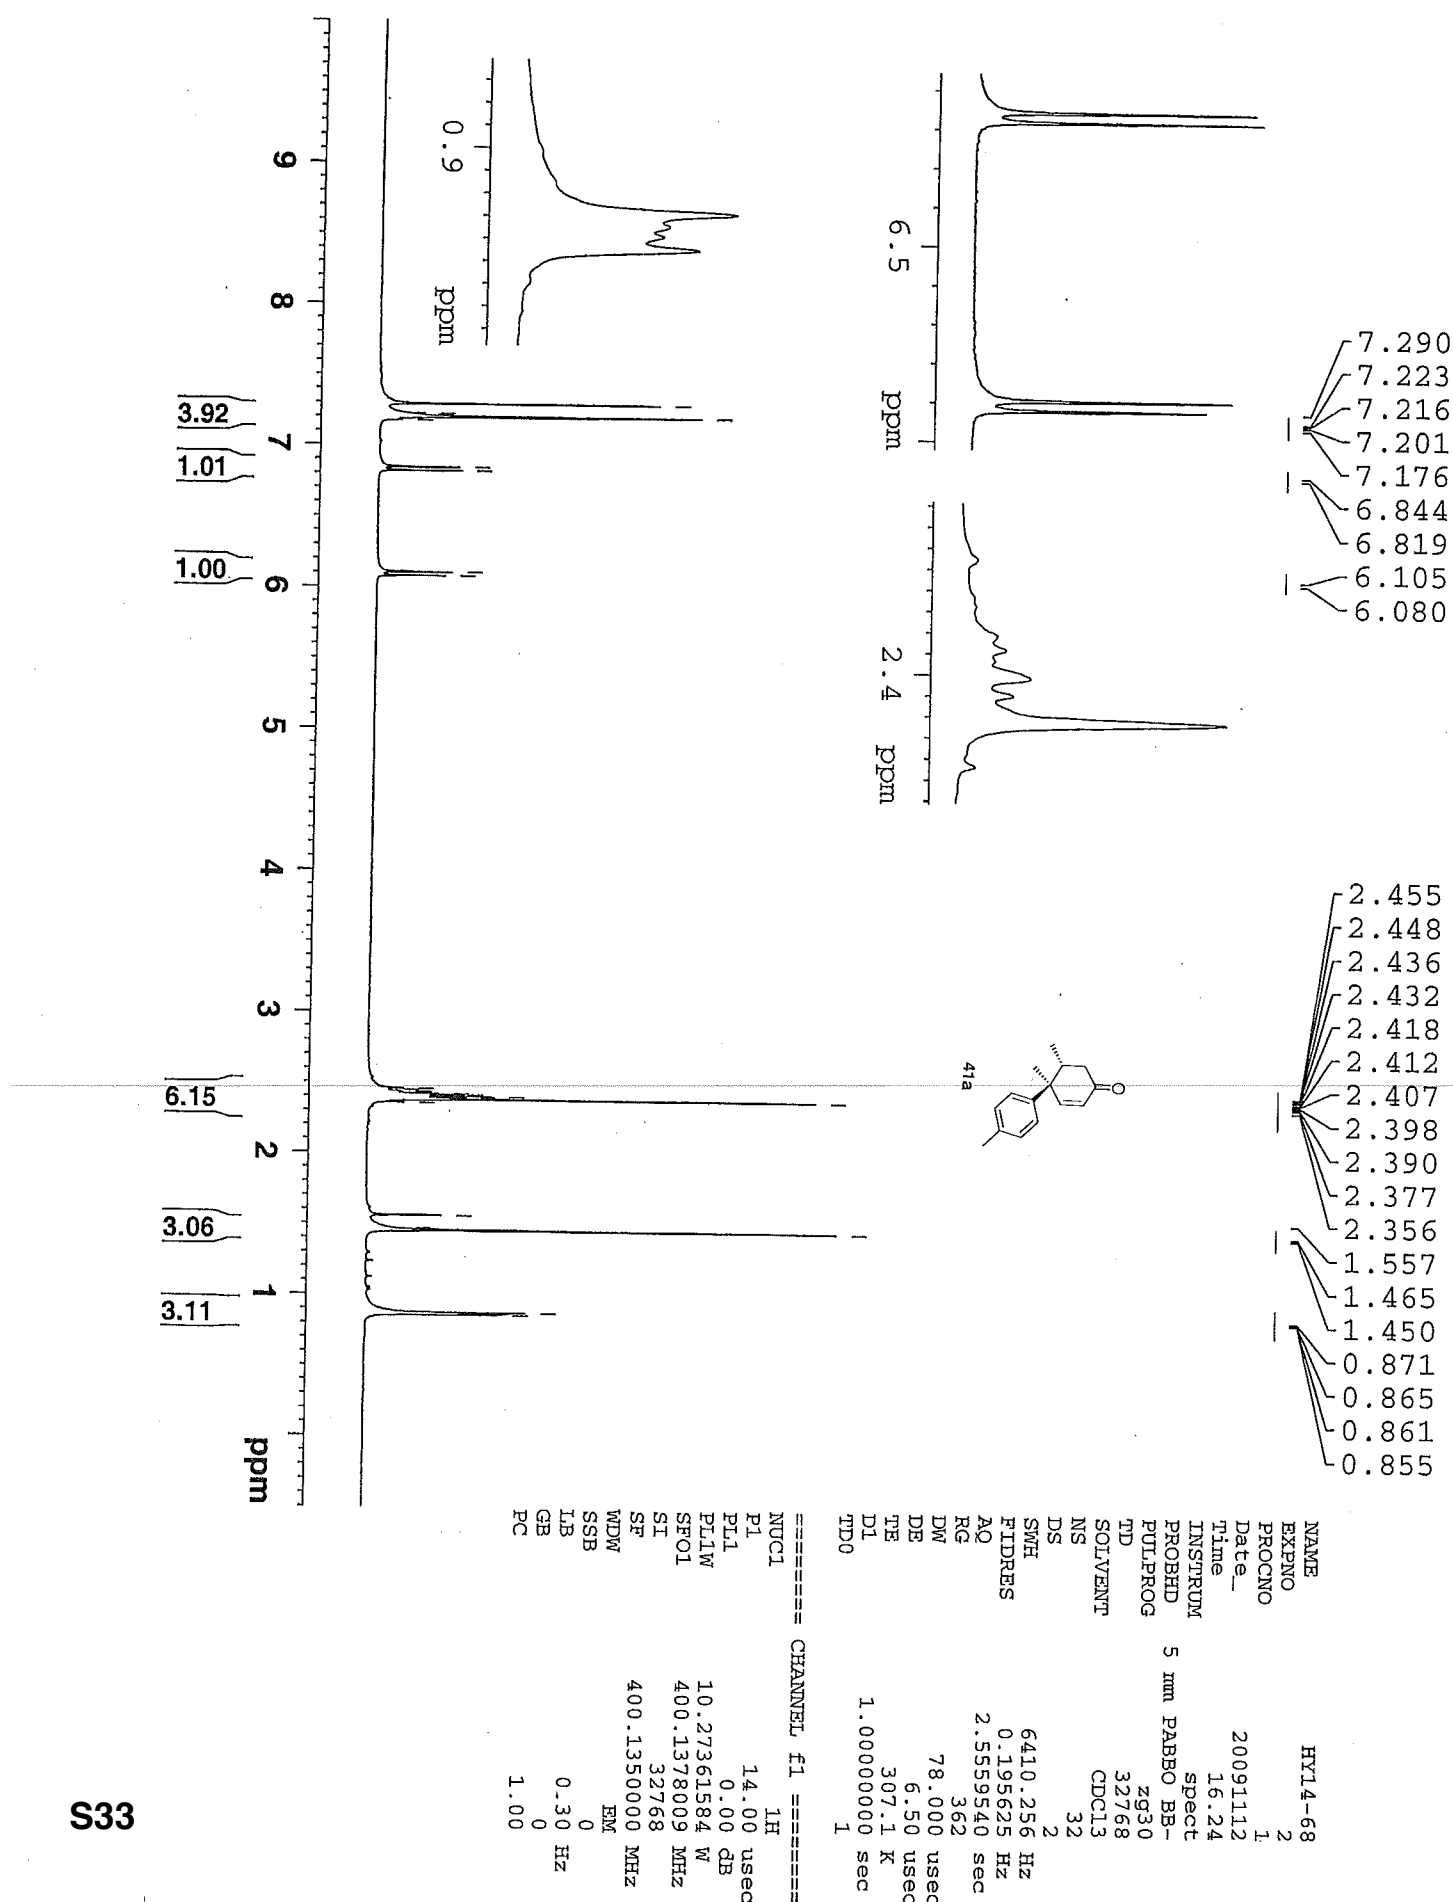

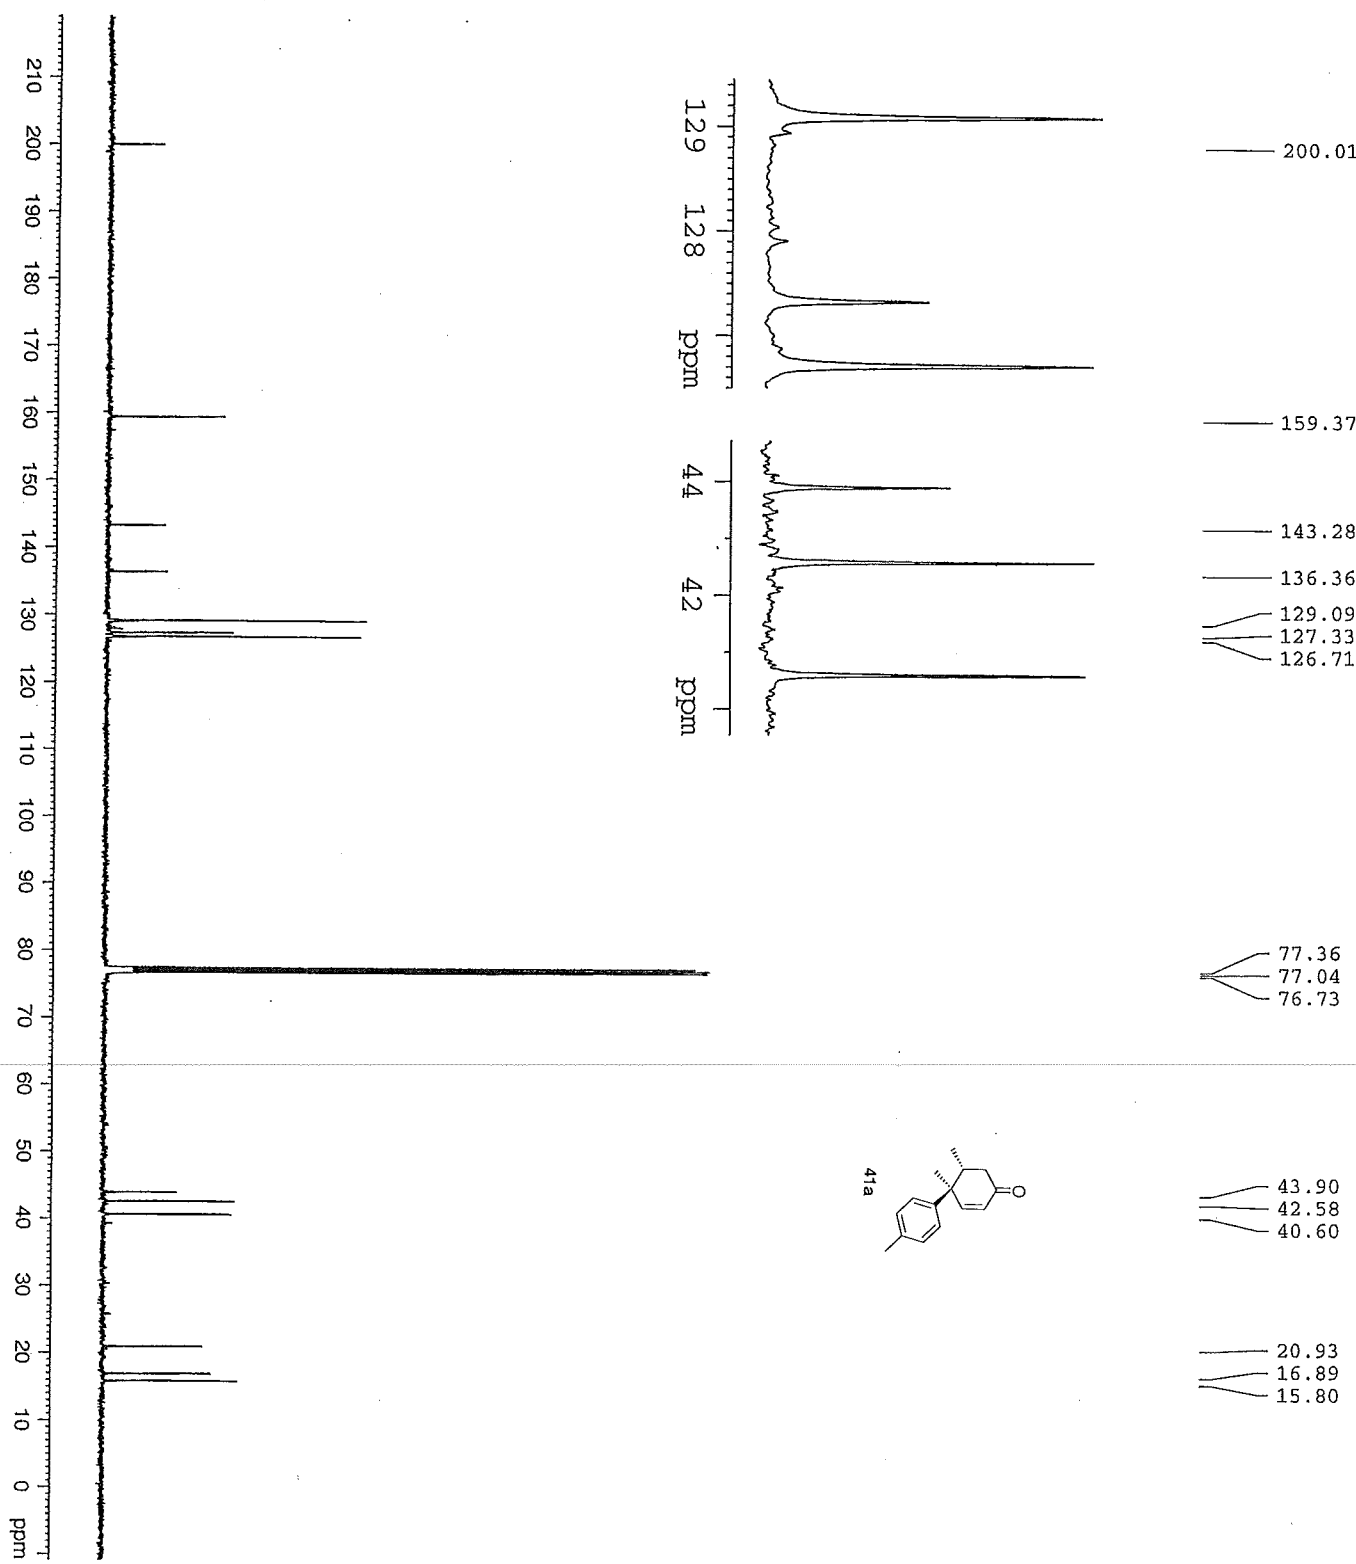

Current Data Parameters

|        |         |
|--------|---------|
| NAME   | HY14-69 |
| EXPNO  | 1       |
| PROCNO | 1       |
| F2     | 1       |
| USER   | Hua     |

F2 - Acquisition Parameters

|         |                |
|---------|----------------|
| Date_   | 20091113       |
| Time    | 14.54          |
| INSTRUM | DPX400         |
| PROBHD  | 5 mm BBO BB-1H |
| PULPROG | zgpg30         |
| TD      | 65536          |
| SOLVENT | CDCl3          |
| NS      | 1509           |
| DS      | 4              |
| SWH     | 23980.814 Hz   |
| FIDRES  | 0.365918 Hz    |
| AQ      | 1.3564756 sec  |
| RG      | 16384          |
| DM      | 20.850 usec    |
| DE      | 298.2 K        |
| TE      | 2.00000000 sec |
| D1      | 0.03000000 sec |
| DELTA   | 1.89999998 sec |
| TD0     | 1              |

==== CHANNEL f1 =====

|      |                 |
|------|-----------------|
| NUC1 | <sup>13</sup> C |
| PL   | 8.30 usec       |
| PL1  | -3.00 dB        |
| SFO1 | 100.6517495 MHz |

==== CHANNEL f2 =====

|         |                 |
|---------|-----------------|
| CPDPRG2 | waltz16         |
| NUC2    | <sup>1</sup> H  |
| PCPD2   | 90.00 usec      |
| PL2     | -3.00 dB        |
| PL12    | 15.00 dB        |
| PL13    | 15.00 dB        |
| SFO2    | 400.2466010 MHz |

F2 - Processing parameters

|     |                 |
|-----|-----------------|
| SI  | 32768           |
| SF  | 100.6416850 MHz |
| WDW | EM              |
| SSB | 0               |
| LB  | 3.00 Hz         |
| GB  | 0               |
| PC  | 1.40            |

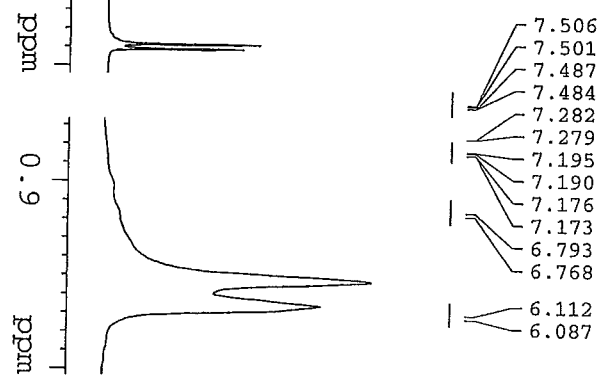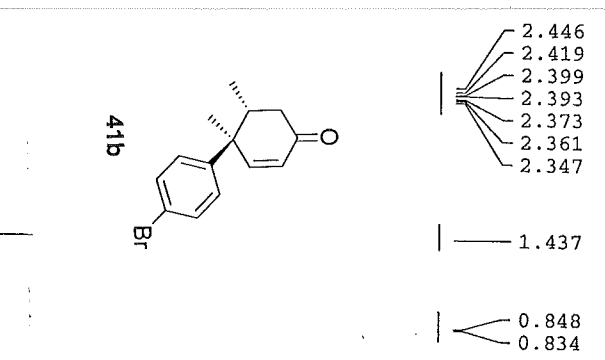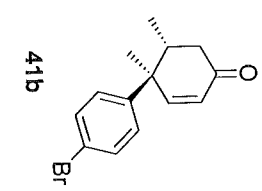

Current Data Parameters  
NAME Hyl-49  
EXPNO 2  
PROCNO 1  
DU /m  
USER Hua  
F2 - Acquisition Parameters  
Date\_ 20091028  
Time 16.54  
INSTRUM DFX400  
PROBHD 5 mm BBO BH-1H  
PULPROG zg30  
TD 32768  
SOLVENT CDCl3  
NS 32  
DS 2  
SWH 6410.256 Hz  
FIDRES 0.195625 Hz  
AQ 2.5559540 sec  
RG 406.4  
DW 78.000 usec  
DE 6.00 usec  
TE 297.2 K  
D1 1.0000000 sec  
TD0 1  
===== CHANNEL f1 =====  
NUC1 1H  
P1 13.50 usec  
PL1 -3.00 dB  
SFO1 400.2478017 MHz  
F2 - Processing parameters  
SI 32768  
SF 400.2450000 MHz  
WDW EN  
SSB 0  
IB 0.30 Hz  
GB 0  
PC 1.00

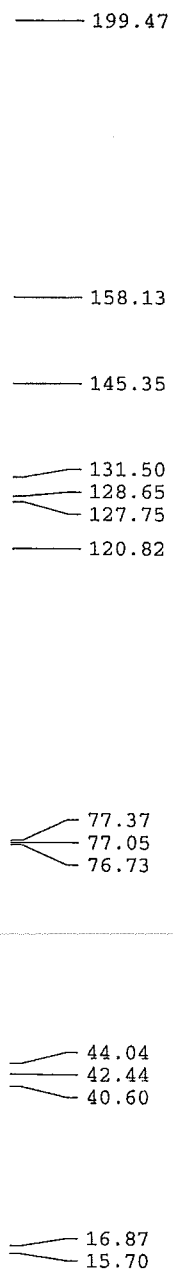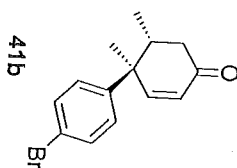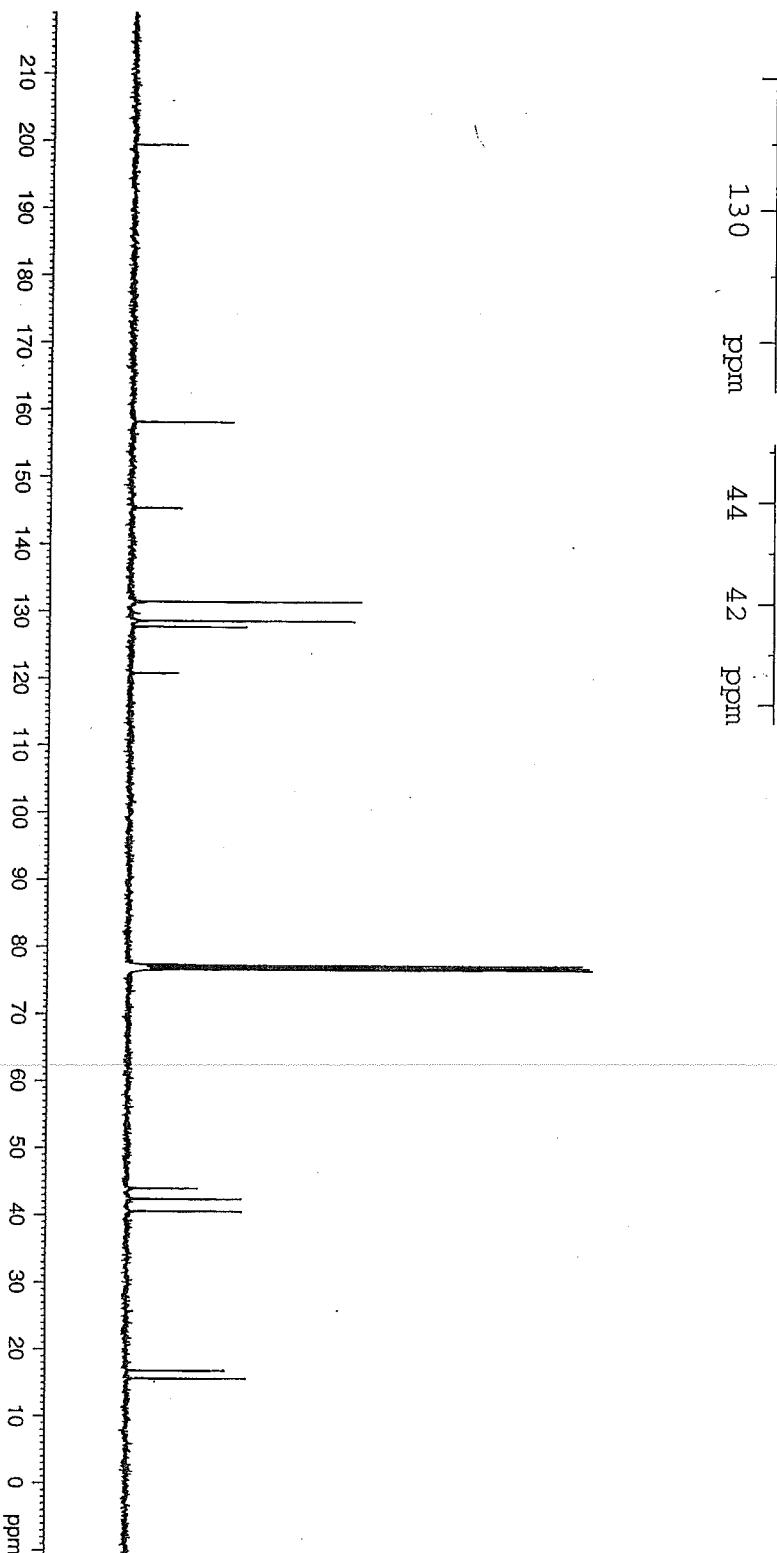

Current Data Parameters  
NAME HY14-50  
EXPNO 4  
PROCNO 1  
DU /m  
USER Hua

F2 - Acquisition Parameters  
Date\_ 20091021  
Time 16.15  
INSTRUM DEK400  
PROBHD 5 mm BBO BB-1H  
PULPROG zgpg30  
TD 65536  
SOLVENT CDCl3  
NS 402  
DS 4  
SWH 23980.814 Hz  
FIDRES 0.365818 Hz  
AQ 1.3664756 sec  
RG 8192  
DW 20.850 usec  
DE 388.2 K  
TE 2.00000000 sec  
d11 0.03000000 sec  
DELTA 1.89999998 sec  
TD0 1

==== CHANNEL f1 =====  
NUC1 13C  
P1 8.30 usec  
PL1 -3.00 dB  
SFO1 100.6517495 MHz

==== CHANNEL f2 =====  
CPDPRG2 waltz16  
NUC2 1H  
PCPD2 90.00 usec  
PL2 -3.00 dB  
PL12 15.00 dB  
PL13 15.00 dB  
SFO2 400.2466010 MHz

F2 - Processing Parameters  
SI 32768  
SF 100.6416850 MHz  
WDW EM  
SSB 0  
LB 3.00 Hz  
GB 0  
PC 1.40

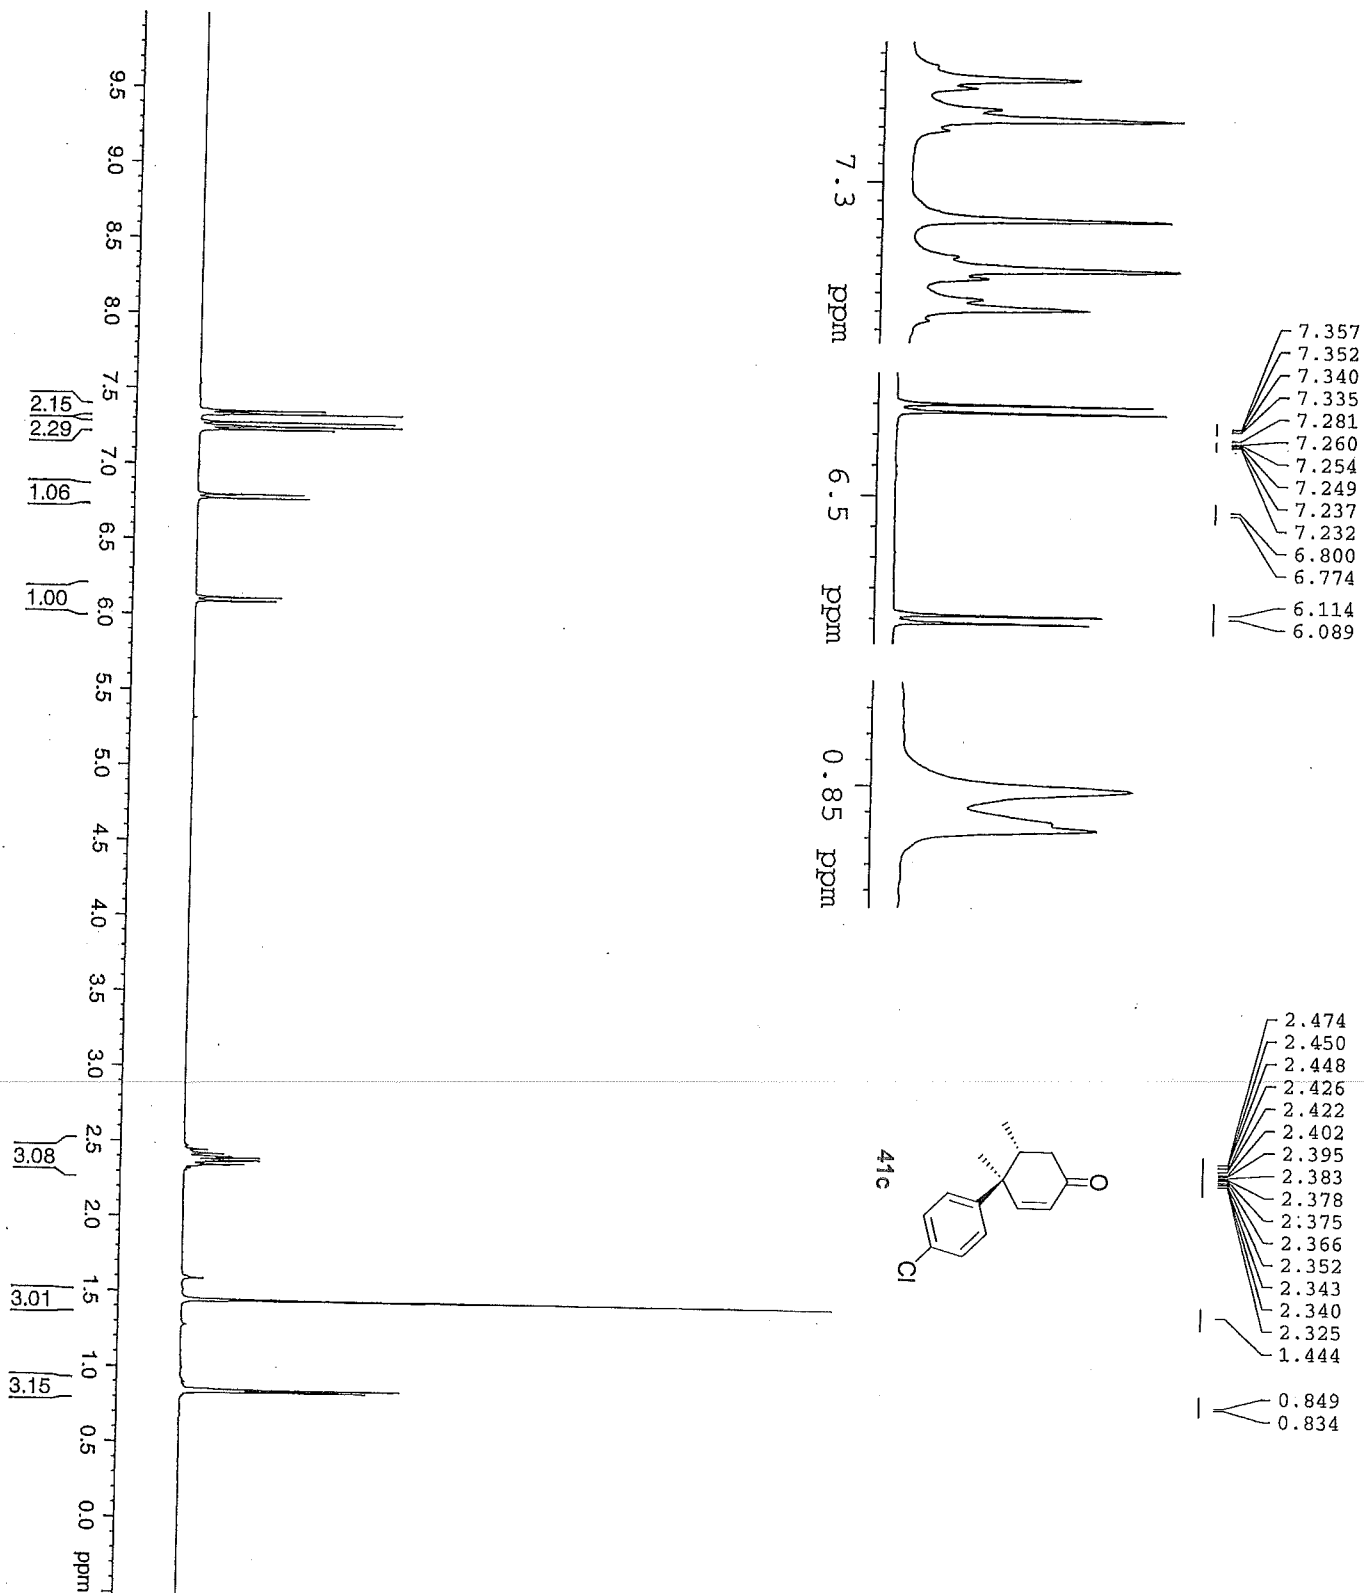

Current Data Parameters  
NAME HT14-66  
EXPNO 5  
PROCNO 1  
DU /m  
USER Hua

F2 - Acquisition Parameters  
Date\_ 20091113  
Time 15.40  
INSTRUM DPX400  
PROBHD 5 mm BBO BB-1H  
PULPROG zgpg30  
TD 32768  
SOLVENT CDCl3  
NS 32  
DS 2  
SWH 6410.256 Hz  
FIDRES 0.19625 Hz  
AQ 2.3559540 sec  
RG 812.7  
WDW 78.000 usec  
DE 6.00 usec  
TE 287.2 K  
D1 1.00000000 sec  
ZD0 1

==== CHANNEL f1 =====  
NUC1 1H  
P1 13.50 usec  
PL -3.00 dB  
SFO1 400.2478017 MHz

F2 - Processing parameters  
SI 32768  
SF 400.2450000 MHz  
WDW EM  
SSB 0  
LB 0.30 Hz  
GB 0  
PC 1.00

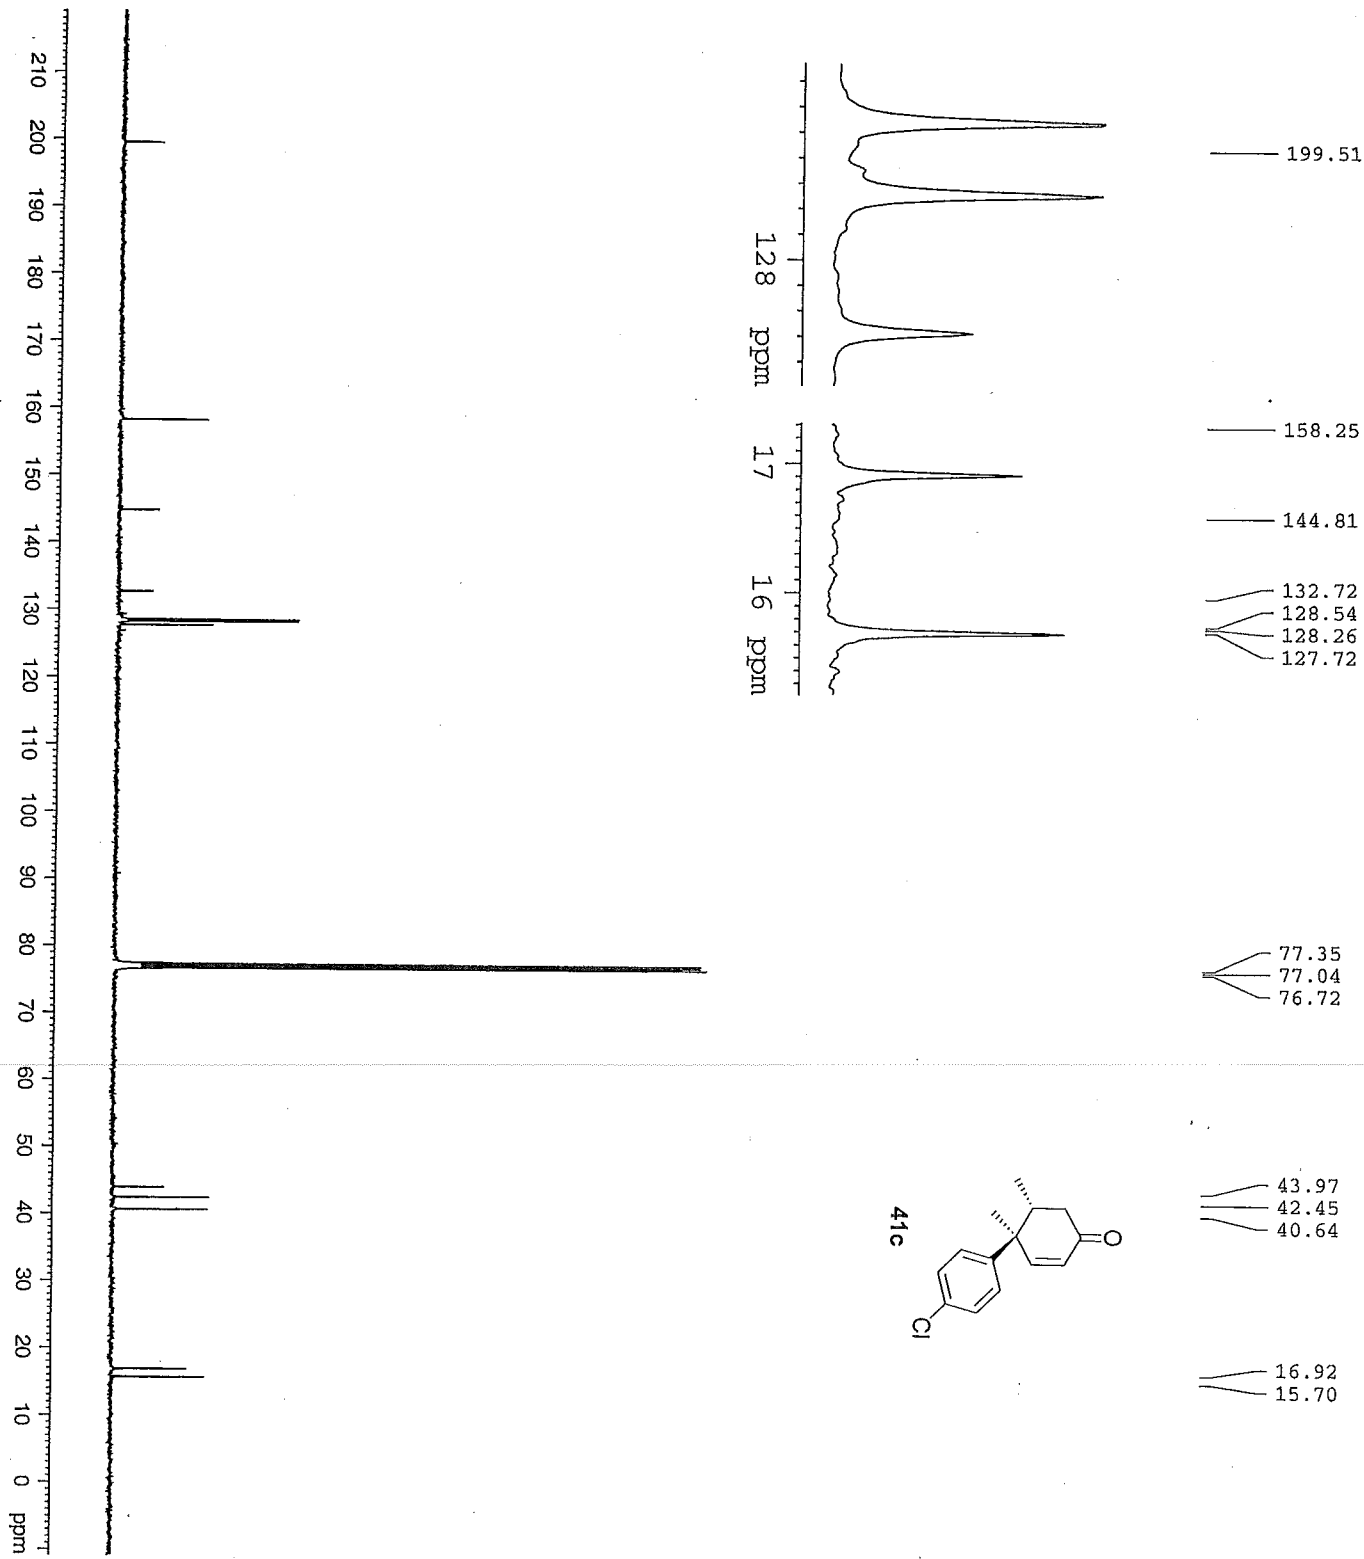

Current Data Parameters  
NAME HY14-66  
EXPNO 3  
PROCNO 1  
F2 - Acquisition Parameters  
Date\_ 20091109  
Time 13.32  
INSTRUM DFX400  
PROBHD 5 mm BBO BB-1H  
PULPROG zgpg30  
TD 65536  
SOLVENT CDCl3  
NS 1789  
DS 4  
SWH 23980.814 Hz  
FIDRES 0.365918 Hz  
AQ 1.3664756 sec  
RG 4096  
DW 20.850 usec  
DE 6.00 usec  
TE 298.2 K  
D1 2.00000000 sec  
d11 0.03000000 sec  
DELTA 1.89999998 sec  
TD0 1

==== CHANNEL f1 =====  
NUC1 13C  
P1 8.30 usec  
PL -3.00 dB  
SFO1 100.6517495 MHz

==== CHANNEL f2 =====  
CPDPRG2 waltz16  
NUC2 1H  
PCPD2 90.00 usec  
PR2 -3.00 dB  
PR12 15.00 dB  
PR13 15.00 dB  
SFO2 400.2466010 MHz

F2 - Processing Parameters  
SI 32768  
SF 100.6416850 MHz  
WDW EX  
SSB 0  
LB 3.00 Hz  
GB 0  
PC 1.40

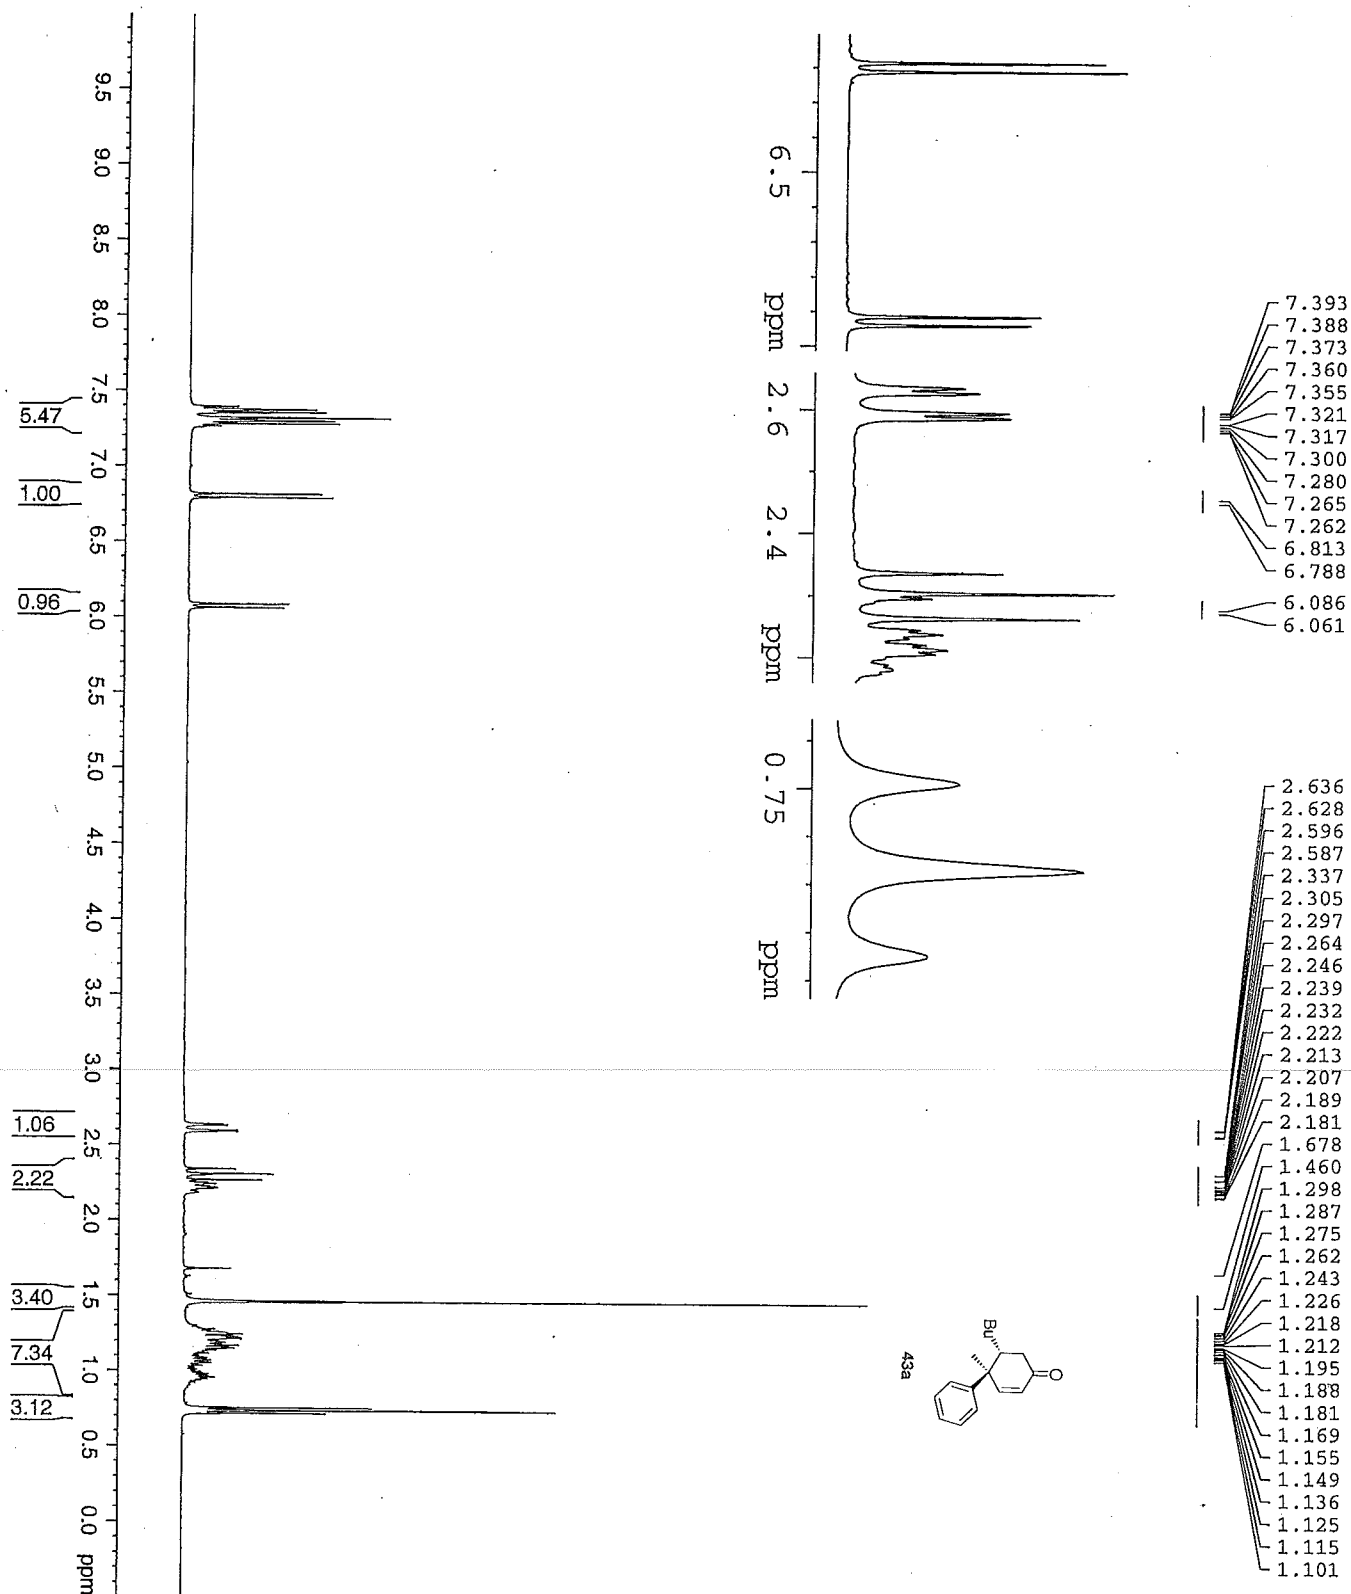

Current Data Parameters  
NAME HT14-45  
EXNO 2  
PROCNO 1  
DU /m  
USPR hua

F2 - Acquisition Parameters  
Date\_ 20091020  
Time 20.58  
INSTRUM DEX400  
PROBHD 5 mm BBO B1-H  
PULPROG zg30  
TD 32768  
SOLVENT CDCl3  
NS 32  
DS 2  
SWH 6410.256 Hz  
FIDRES 0.195625 Hz  
AQ 2.5559540 sec  
RG 161.3  
DW 78.000 usec  
DE 6.00 usec  
TE 298.2 K  
D1 1.00000000 sec  
TD0 1

===== CHANNEL f1 =====  
NUC1 1H  
P1 13.50 usec  
PL -3.00 dB  
SFO1 400.2478017 MHz

F2 - Processing parameters  
SI 32768  
SF 400.2450000 MHz  
WDW EM  
SSB 0  
LB 0.30 Hz  
GB 0  
PC 1.00

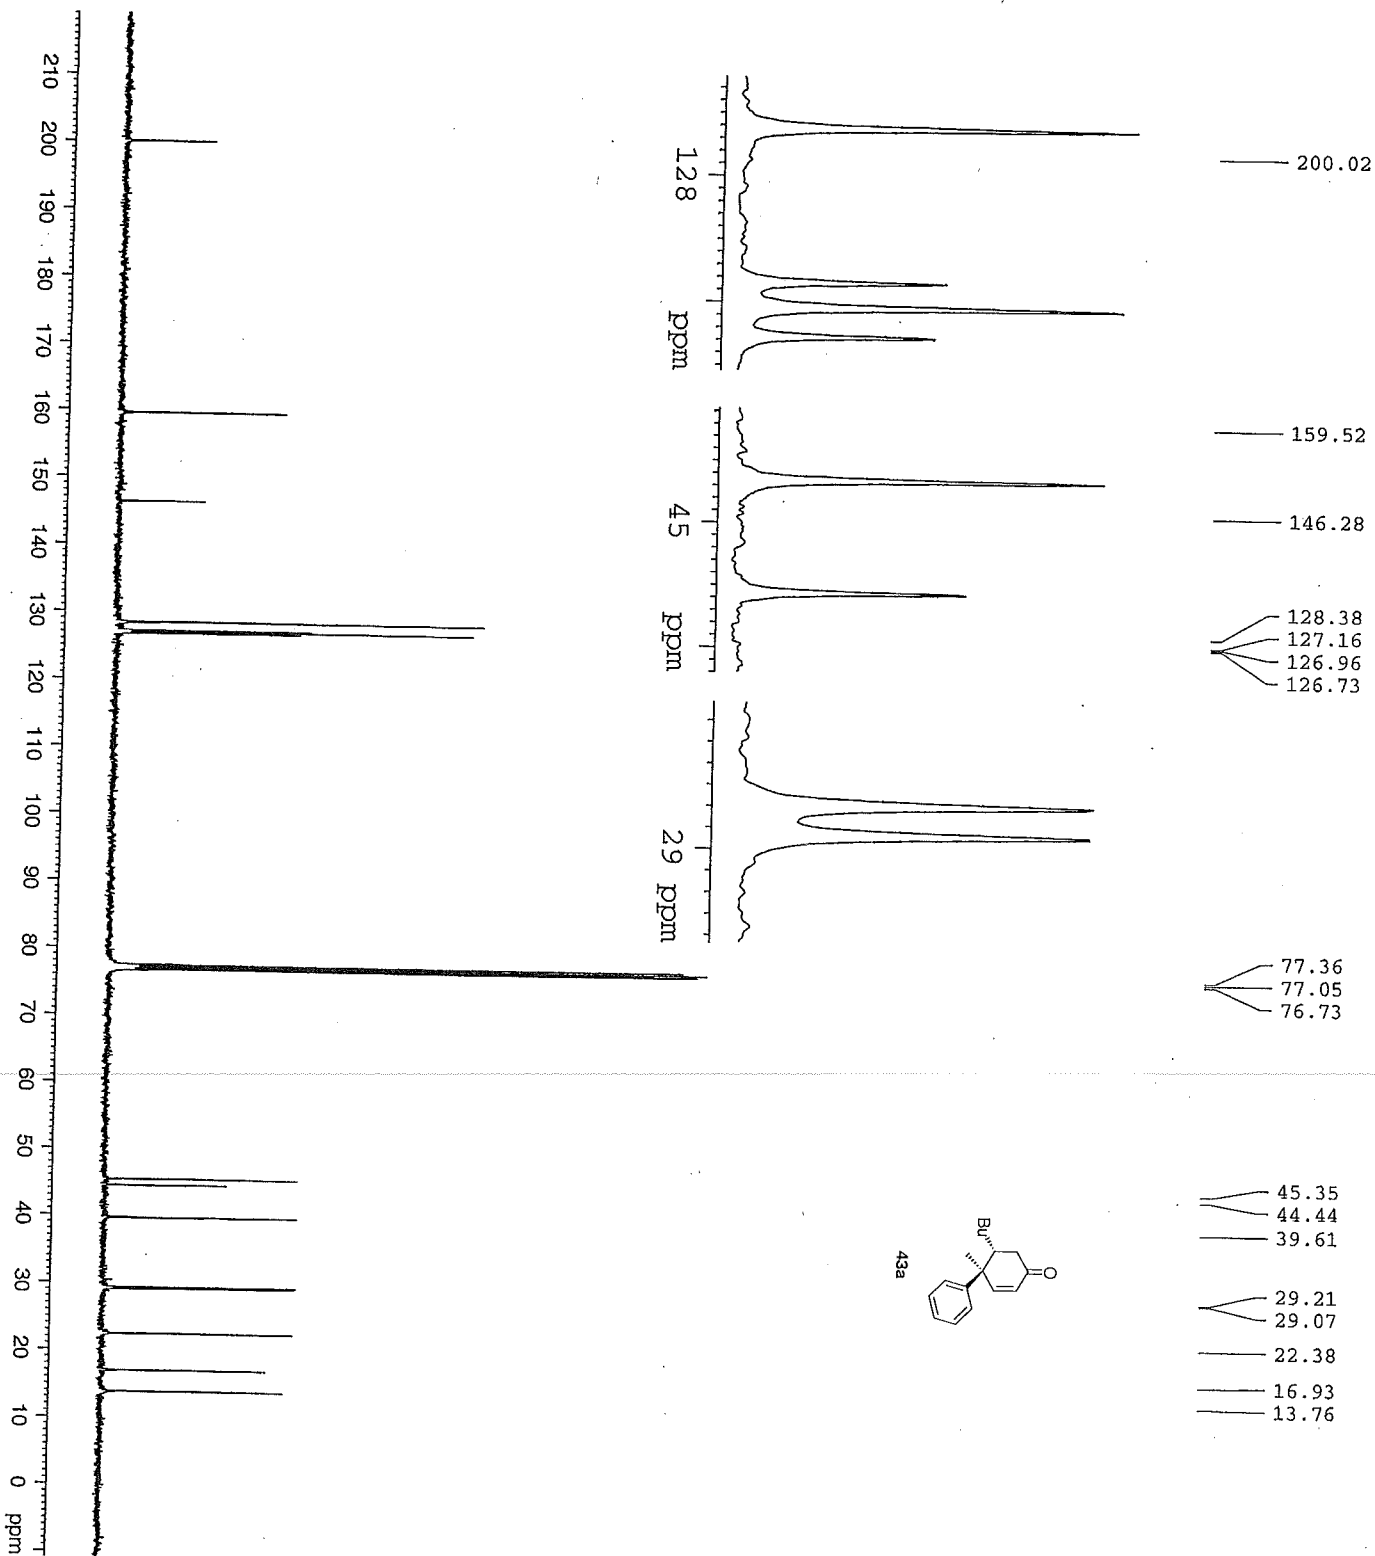

Current Data Parameters  
NAME HT14-45  
EXPNO 4  
PROCNO 1  
F2 - Acquisition Parameters  
Date\_ 20091020  
Time 22.06  
INSTRUM DEX400  
PROBHD 5 mm BBO BB-1H  
PULPROG zgpg30  
TD 65536  
SOLVENT CDCl3  
NS 1001  
DS 4  
SWH 23980.814 Hz  
FIDRES 0.365918 Hz  
AQ 1.3664756 sec  
RG 32768  
DW 20.850 usec  
DE 6.00 usec  
TE 299.2 K  
D1 2.00000000 sec  
d11 0.03000000 sec  
DELTA 1.89999998 sec  
TD0 1  
===== CHANNEL f1 =====  
NUC1 13C  
P1 8.30 usec  
PL1 -3.00 dB  
SFO1 100.6517495 MHz  
===== CHANNEL f2 =====  
CPDPRG2 waltz16  
NUC2 1H  
PCPD2 90.00 usec  
PL2 -3.00 dB  
PL12 15.00 dB  
PL13 15.00 dB  
SFO2 400.2466010 MHz  
F2 - Processing parameters  
SI 32768  
SF 100.641850 MHz  
WDW EM  
SSB 0  
LB 3.00 Hz  
GB 0  
PC 1.40



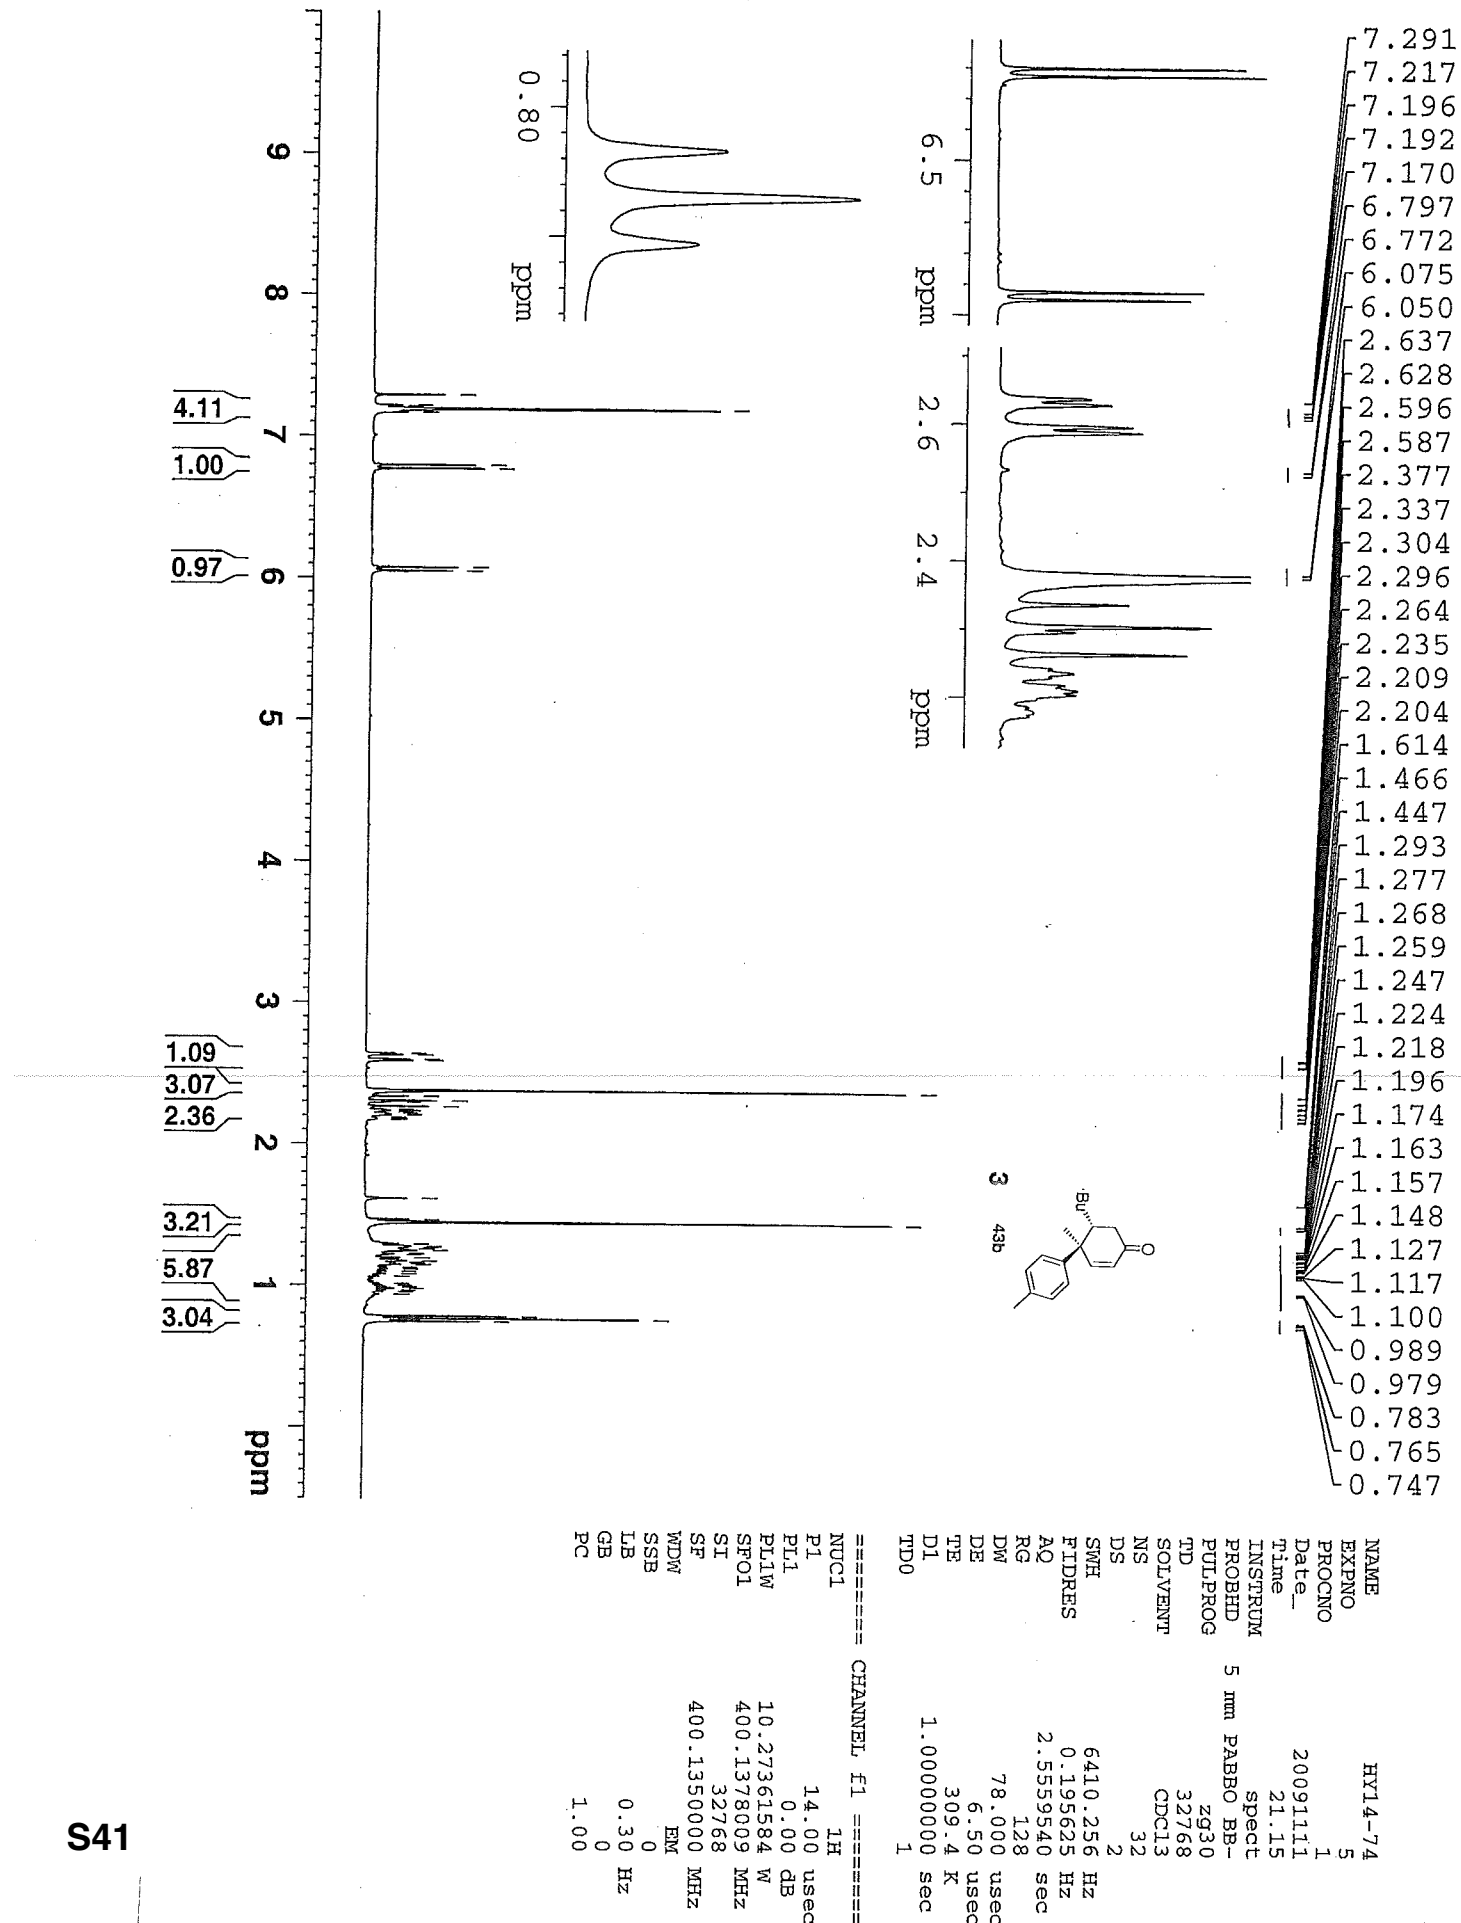

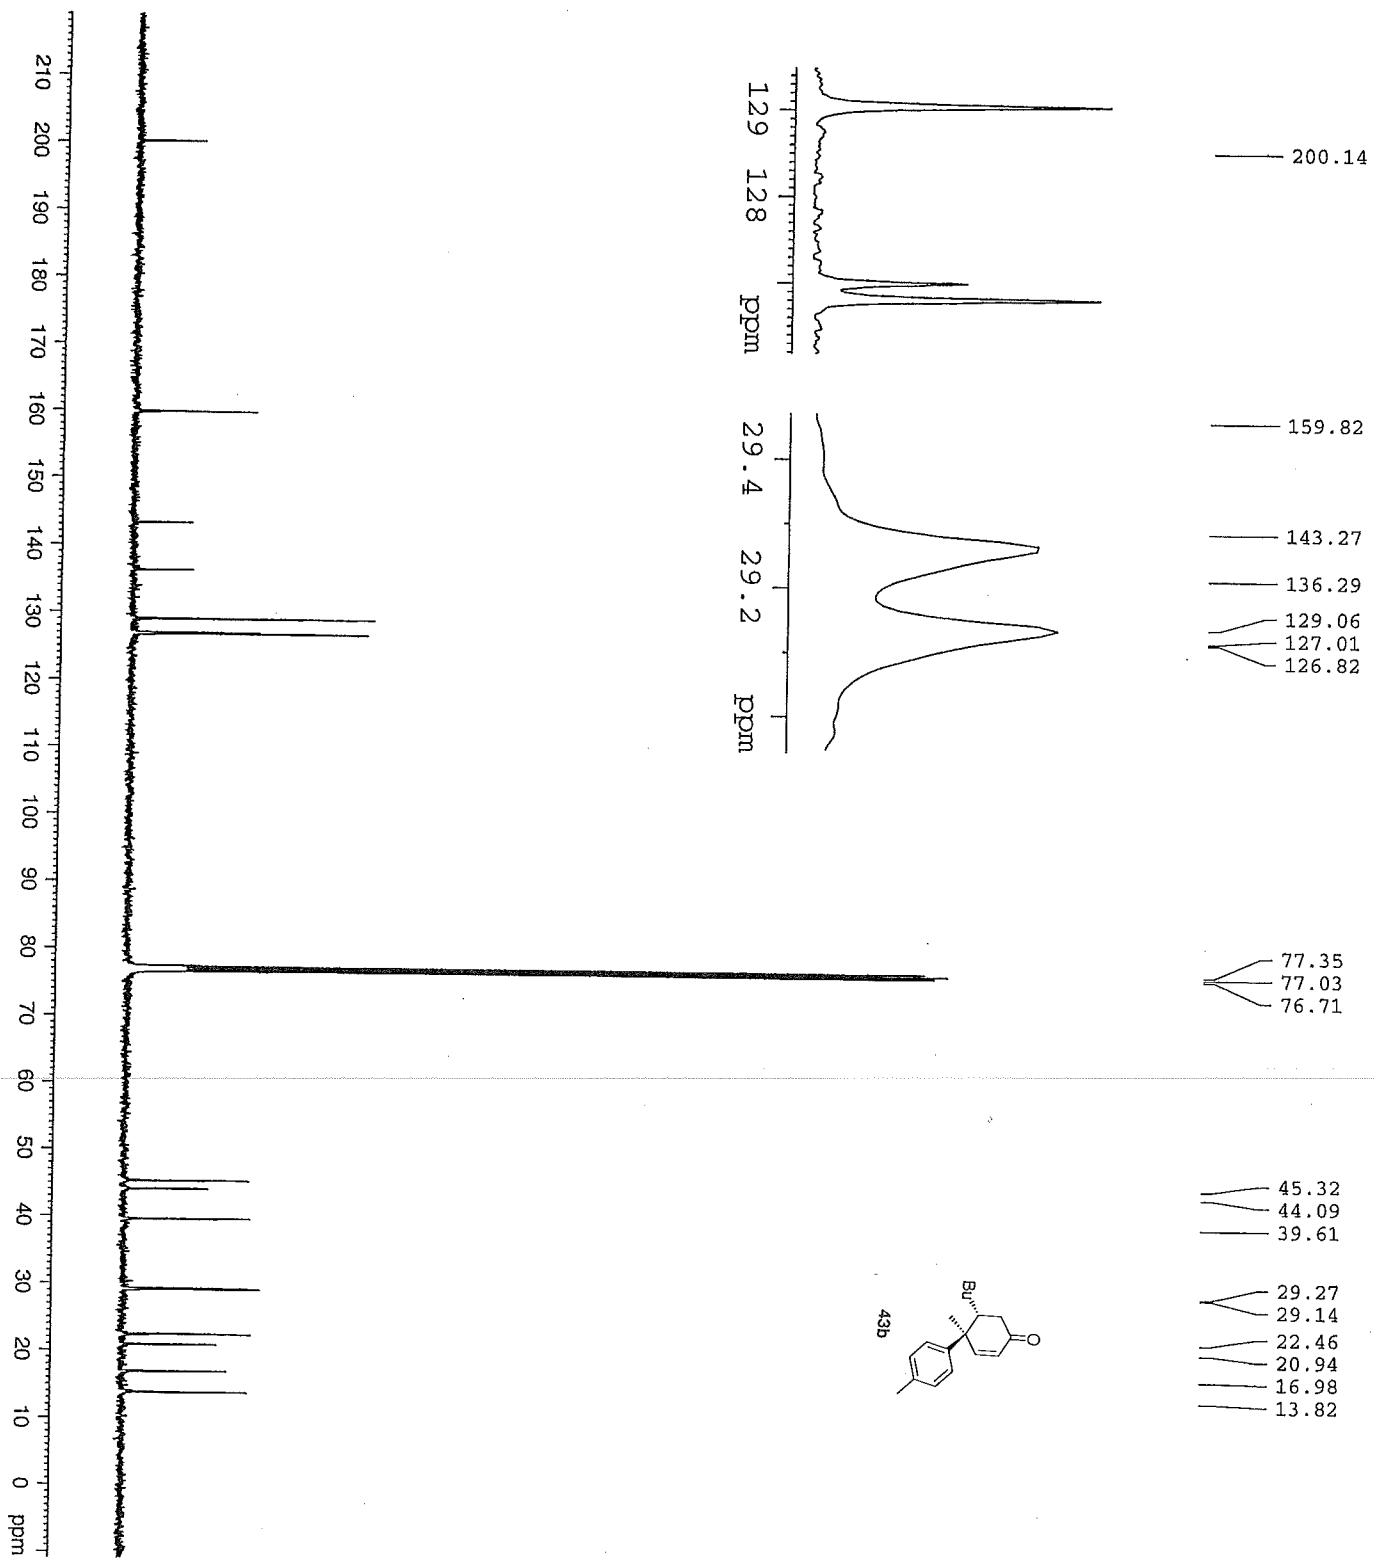

Current Data Parameters  
NAME HYL4-74  
EXPNO 3  
PROCNO 1  
ID 1  
USER Hua

F2 - Acquisition Parameters  
Date\_ 20091111  
Time 16:41  
INSTRUM DFK400  
PROBHD 5 mm BBO BB-1H  
PULPROG zgpg30  
TD 65536  
SOLVENT CDCl3  
NS 1500  
DS 4  
SWH 23980.814 Hz  
FIDRES 0.365918 Hz  
AQ 1.3664756 sec  
RG 11585.2  
DE 20.850 usec  
TE 298.2 K  
D1 2.00000000 sec  
d11 0.03000000 sec  
DELTA 1.8993998 sec  
TD0 1

===== CHANNEL f1 =====  
NUC1 13C  
P1 8.30 usec  
PL1 -3.00 dB  
SFO1 100.6517495 MHz

===== CHANNEL f2 =====  
CPDPRG2 waltz16  
NUC2 1H  
PCPD2 90.00 usec  
PL2 -3.00 dB  
PL12 15.00 dB  
PL13 15.00 dB  
SFO2 400.2466010 MHz

F2 - Processing parameters  
SI 32768  
SF 100.6416850 MHz  
WDW EM  
SSB 0  
LB 3.00 Hz  
GB 0  
PC 1.40

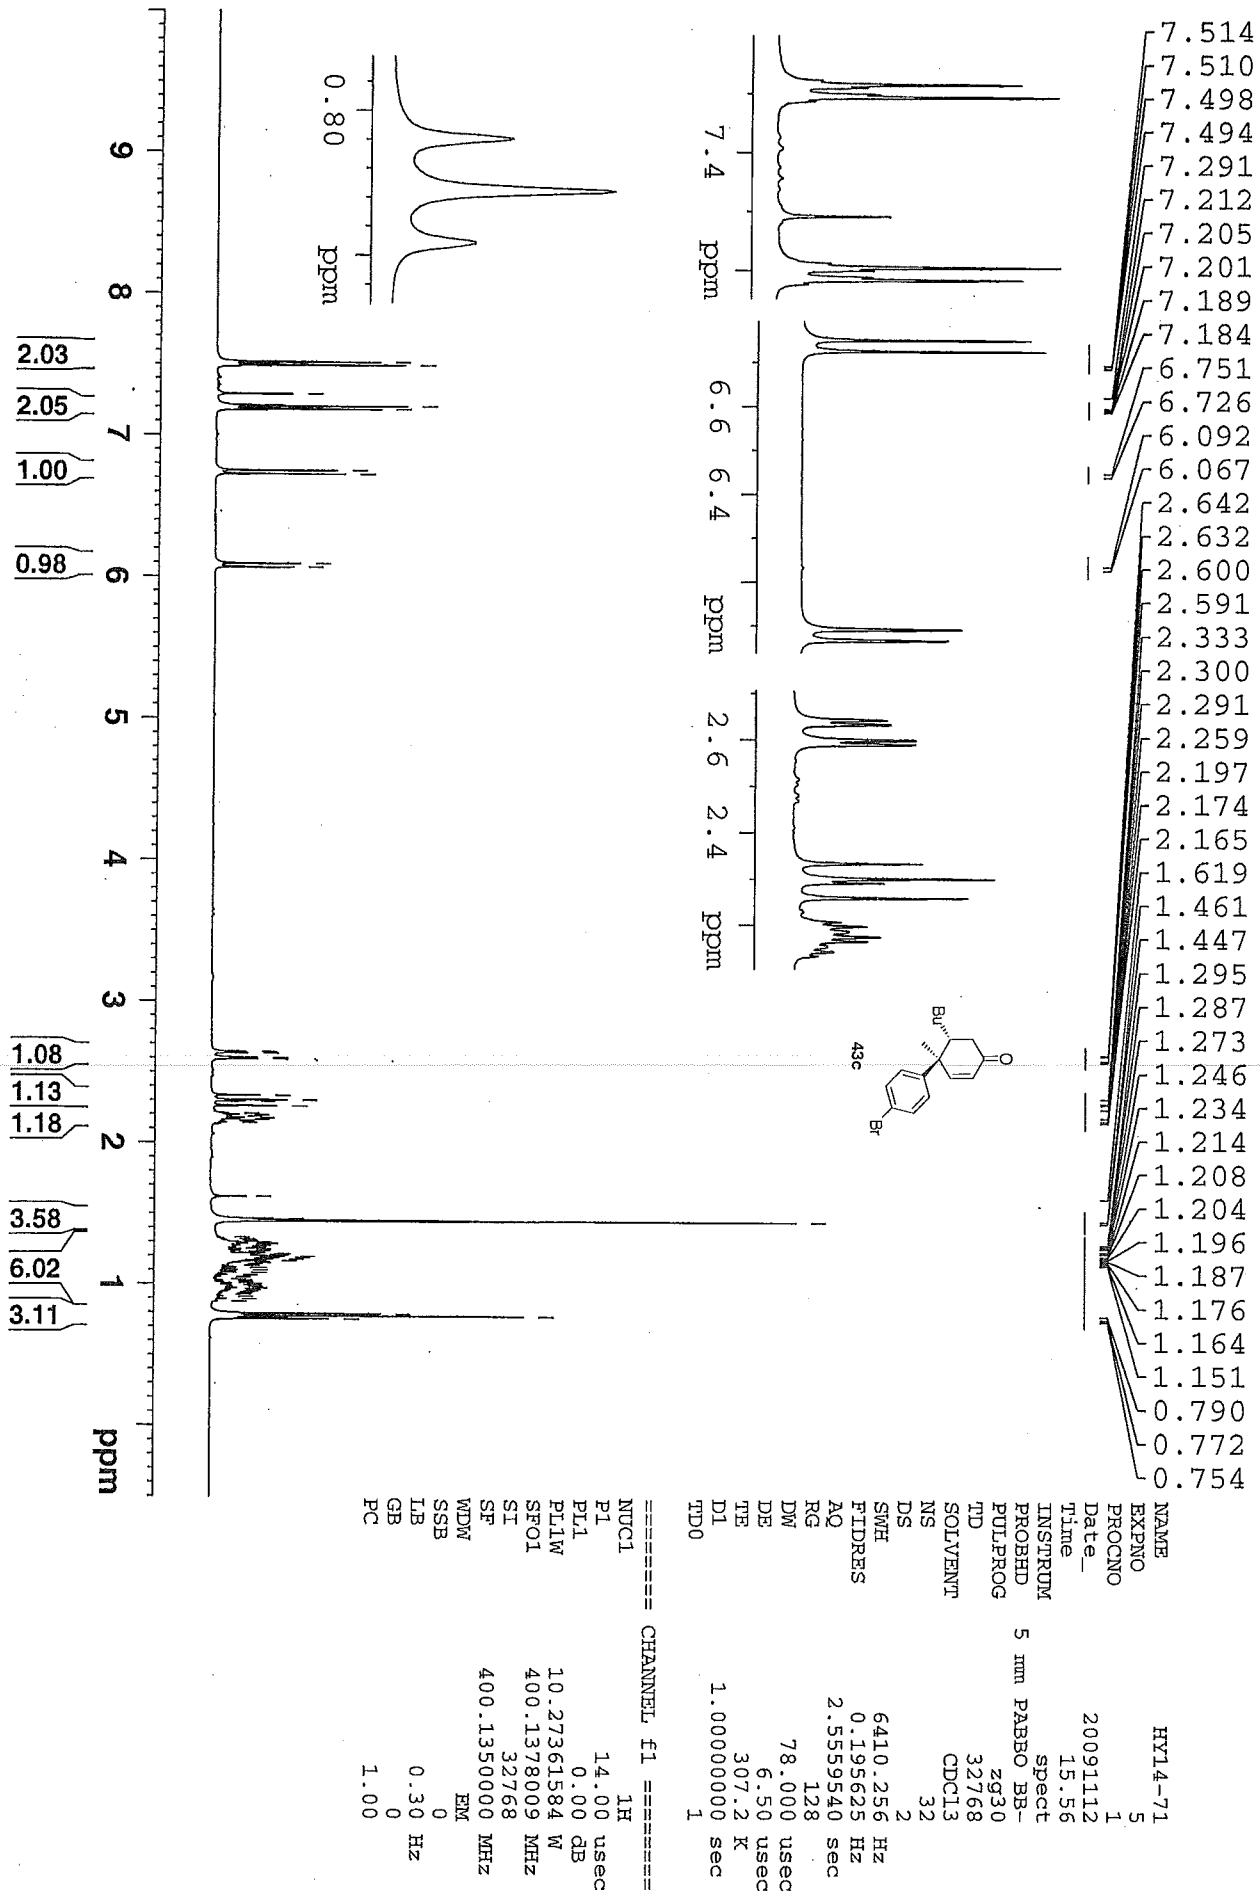

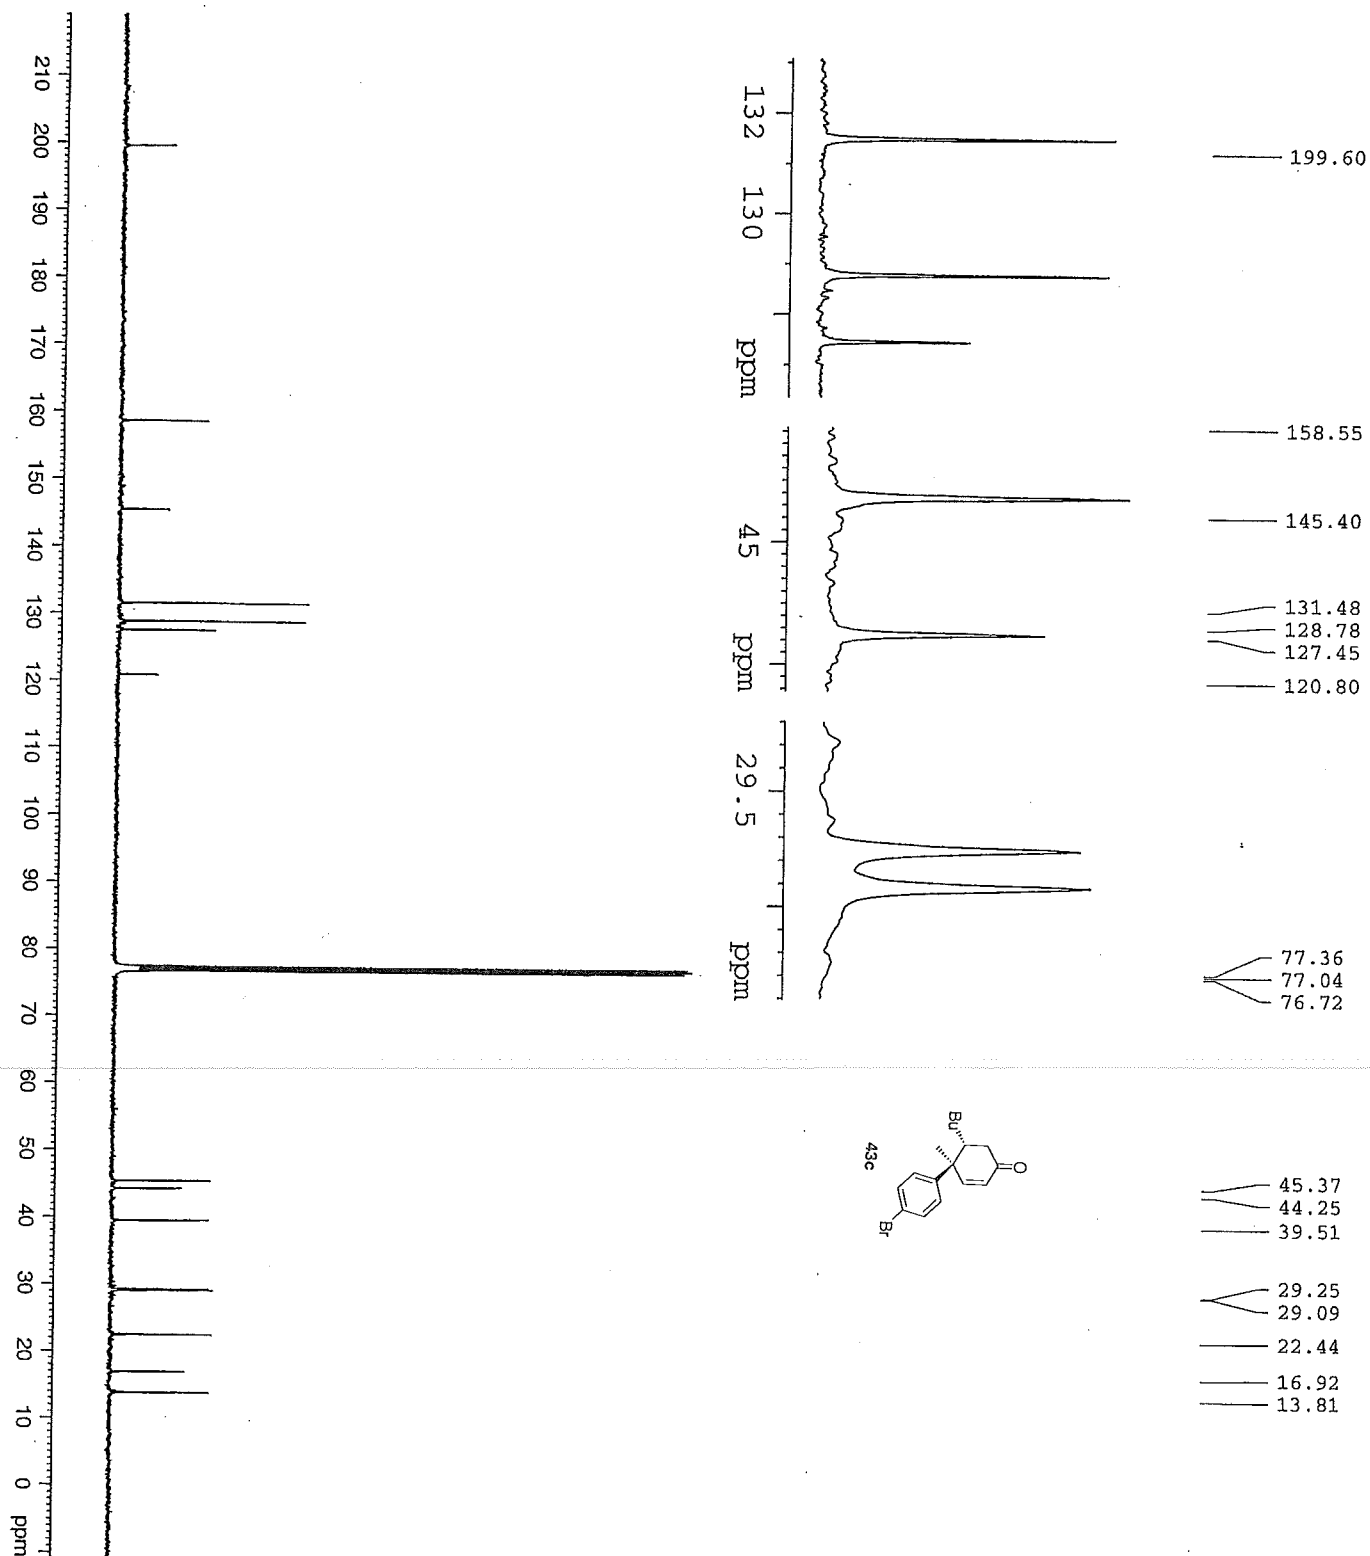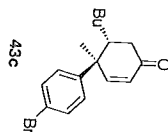

```

Current Data Parameters
NAME          HY1-71
EXPNO         7
PROCNO        1
DU            1 /m
USER          Hua

F2 - Acquisition Parameters
Date_         20091112
Time          16.33
INSTRUM       DPK4000
PROBHD        5 mm BBO BB-1H
PULPROG       zgpg30
TD            65536
SOLVENT       CDCl3
DS            1231
SWH           23980.814 Hz
FIDRES       0.365918 Hz
AQ           1.3664756 sec
RG           9195.2
DM           20.850 usec
DE           6.00 usec
TE           298.2 K
D1           2.00000000 sec
d11          0.03000000 sec
DELTA        1.88959998 sec
TD0          1

===== CHANNEL f1 =====
NUC1          13C
P1            8.30 usec
PL1          -3.00 dB
SFO1         100.6517495 MHz

===== CHANNEL f2 =====
CPDPRG2       waltz16
NUC2          1H
PC2           90.00 usec
DCPCP2       -3.00 dB
PL2          15.00 dB
PL12         15.00 dB
PL13         15.00 dB
SFO2         400.2466010 MHz

F2 - Processing Parameters
SI           32768
SF           100.6416880 MHz
WDW          EM
SSB          0
GB           3.00 Hz
CB           1.40
GC          0

```

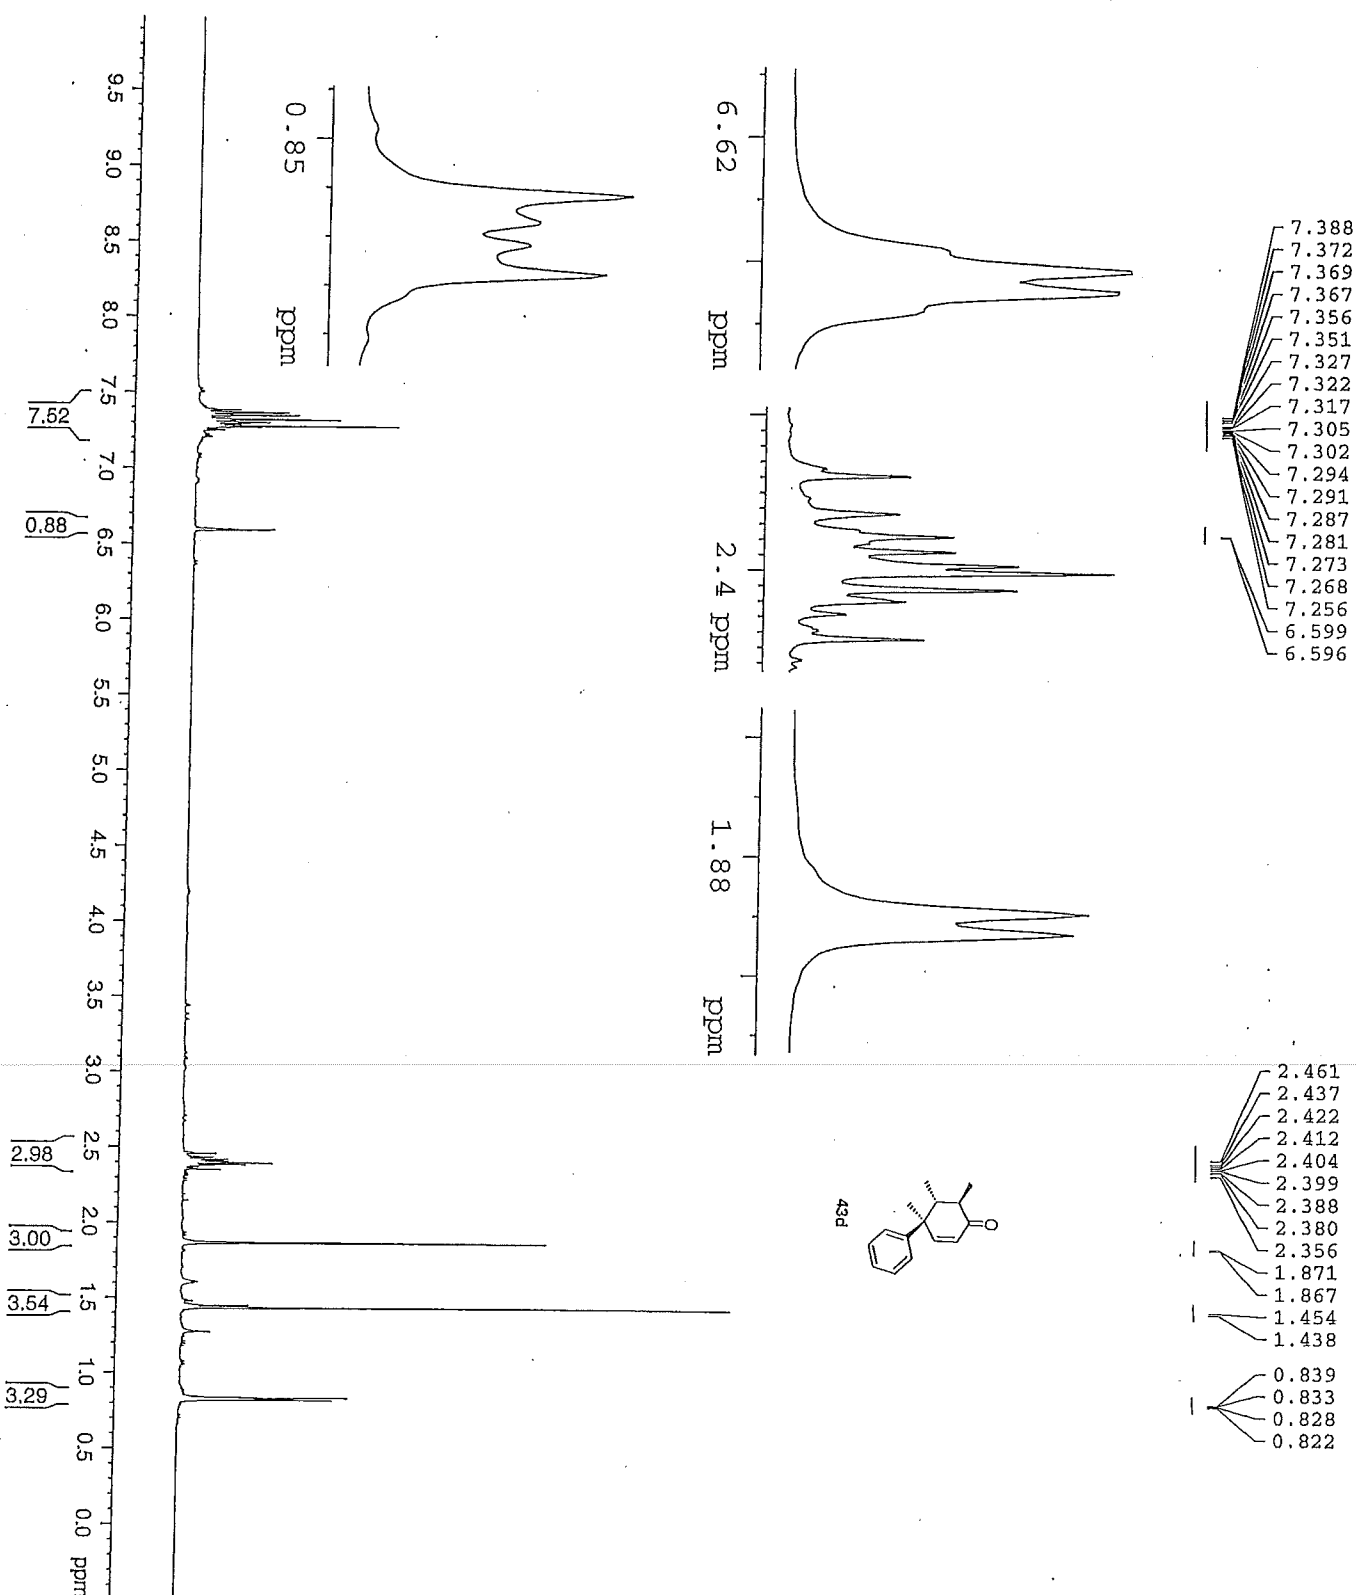

Current Data Parameters  
NAME HYL442  
EXPNO 1  
PROCNO 1  
DIR /m  
USER Hui

F2 - Acquisition Parameters  
Date\_ 20091020  
Time 10.58  
INSTRUM DPK400  
PROBHD 5 mm BBO HS-1H  
PULPROG zg30  
TD 32768  
SOLVENT CDCl3  
NS 32  
DS 2  
SWH 6410.256 Hz  
FIDRES 0.195625 Hz  
AQ 2.5559540 sec  
RG 322.5  
RW 78.000 usec  
DE 6.00 usec  
TE 298.2 K  
D1 1.00000000 sec  
TD0 1

==== CHANNEL f1 =====  
NUC1 1H  
P1 13.50 usec  
PL -3.00 dB  
SFO1 400.2478017 MHz

F2 - Processing parameters  
SI 32768  
SF 400.2450000 MHz  
WDW EM  
SSB 0  
LB 0.30 Hz  
GB 0  
PC 1.00

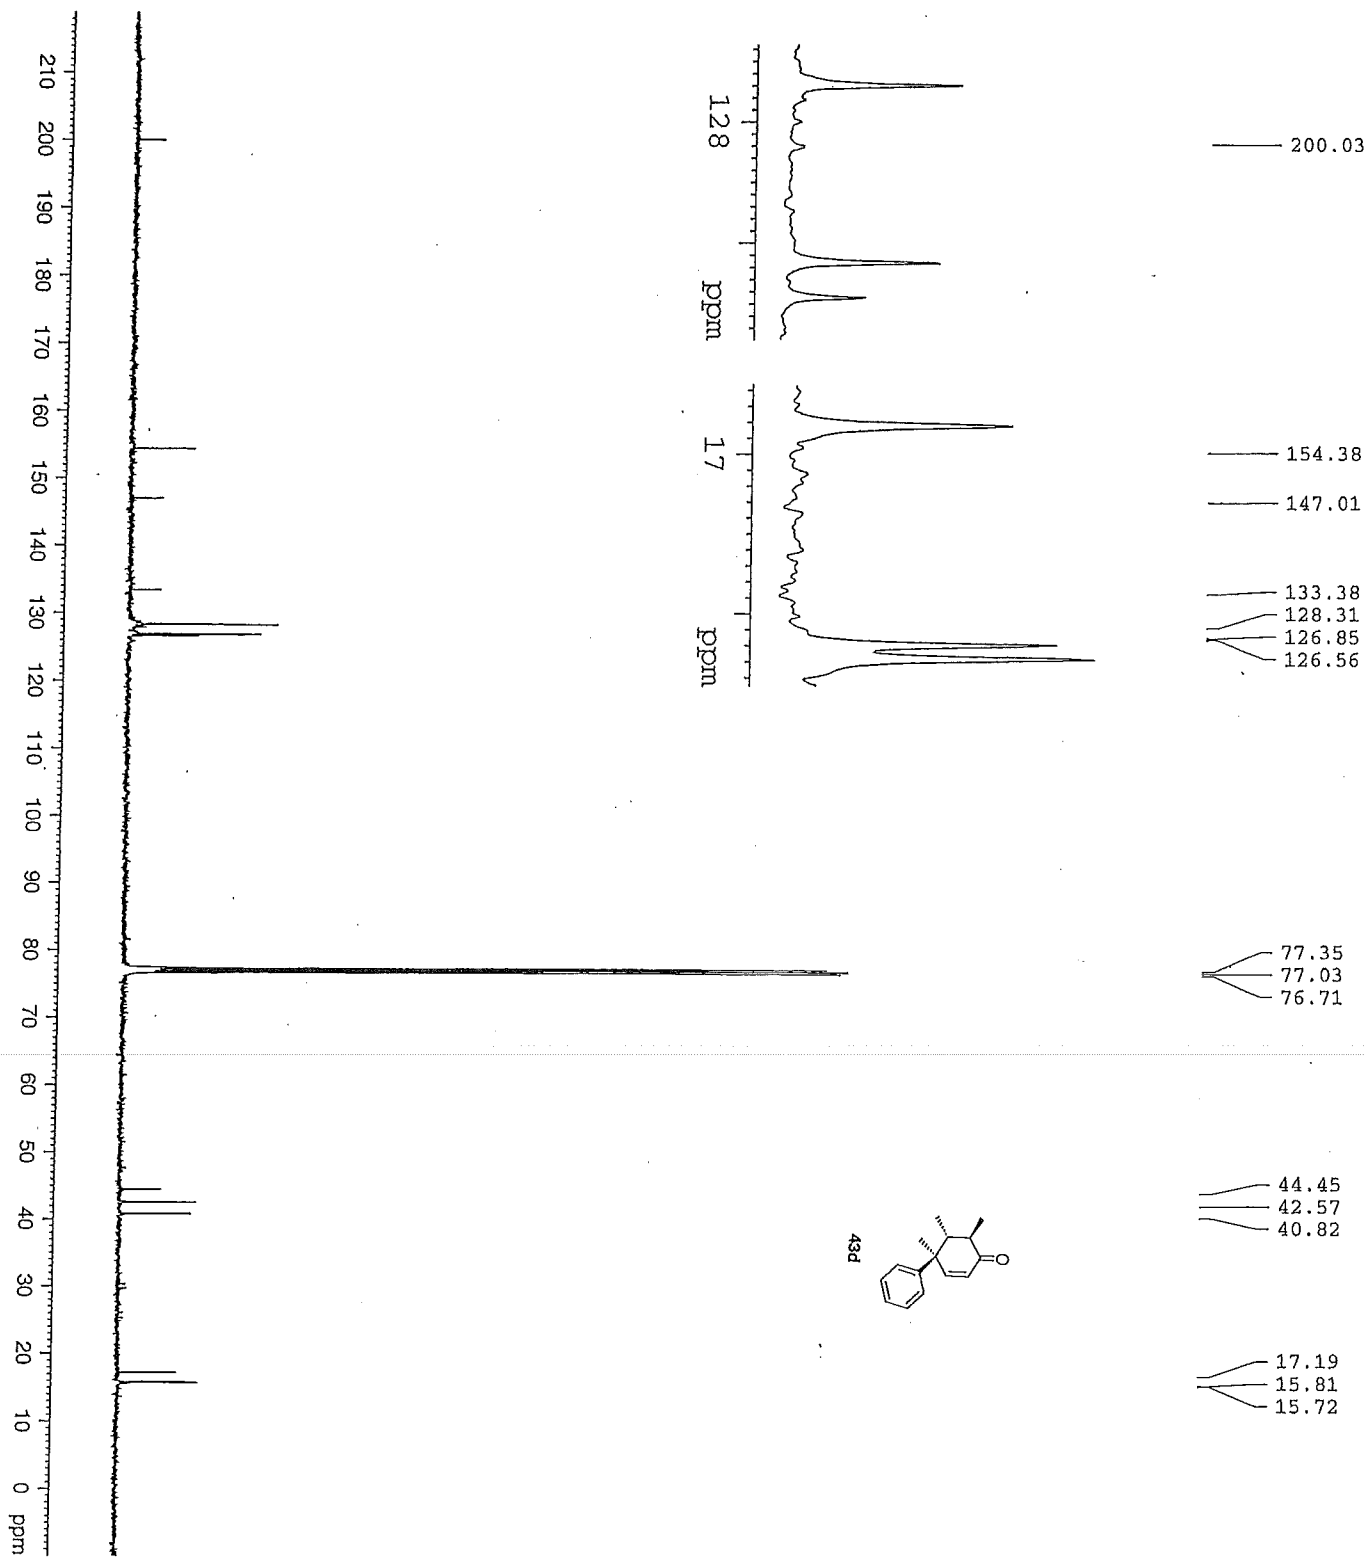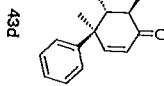

Current Data Parameters  
NAME HYL4-42  
EXPNO 3  
PROCNO 1  
DU /m  
USER Hua

F2 - Acquisition Parameters  
Date\_ 20081020  
Time 12.24  
INSTRUM DEX400  
PROBHD 5 mm BBO BB-1H  
PULPROG zgpg30  
TD 65536  
SOLVENT CDCl<sub>3</sub>  
NS 1253  
DS 4  
SWH 23980.814 Hz  
FIDRES 0.365918 Hz  
AQ 1.3664756 sec  
RG 2580.3  
DW 20.850 usec  
DE 6.00 usec  
TE 299.2 K  
D1 2.00000000 sec  
d11 0.03000000 sec  
DELTA 1.89999998 sec  
TD0 1

==== CHANNEL f1 =====  
NUC1 13C  
P1 8.30 usec  
PL1 -3.00 dB  
SFO1 100.6517485 MHz

==== CHANNEL f2 =====  
CPDPRG2 waltz16  
NUC2 1H  
PCPD2 90.00 usec  
PL2 -3.00 dB  
PL12 15.00 dB  
PL13 15.00 dB  
SFO2 400.2466010 MHz

F2 - Processing parameters  
SI 32768  
SF 100.6416850 MHz  
WDW EM  
SSB 0  
LB 3.00 Hz  
GB 0  
PC 1.40

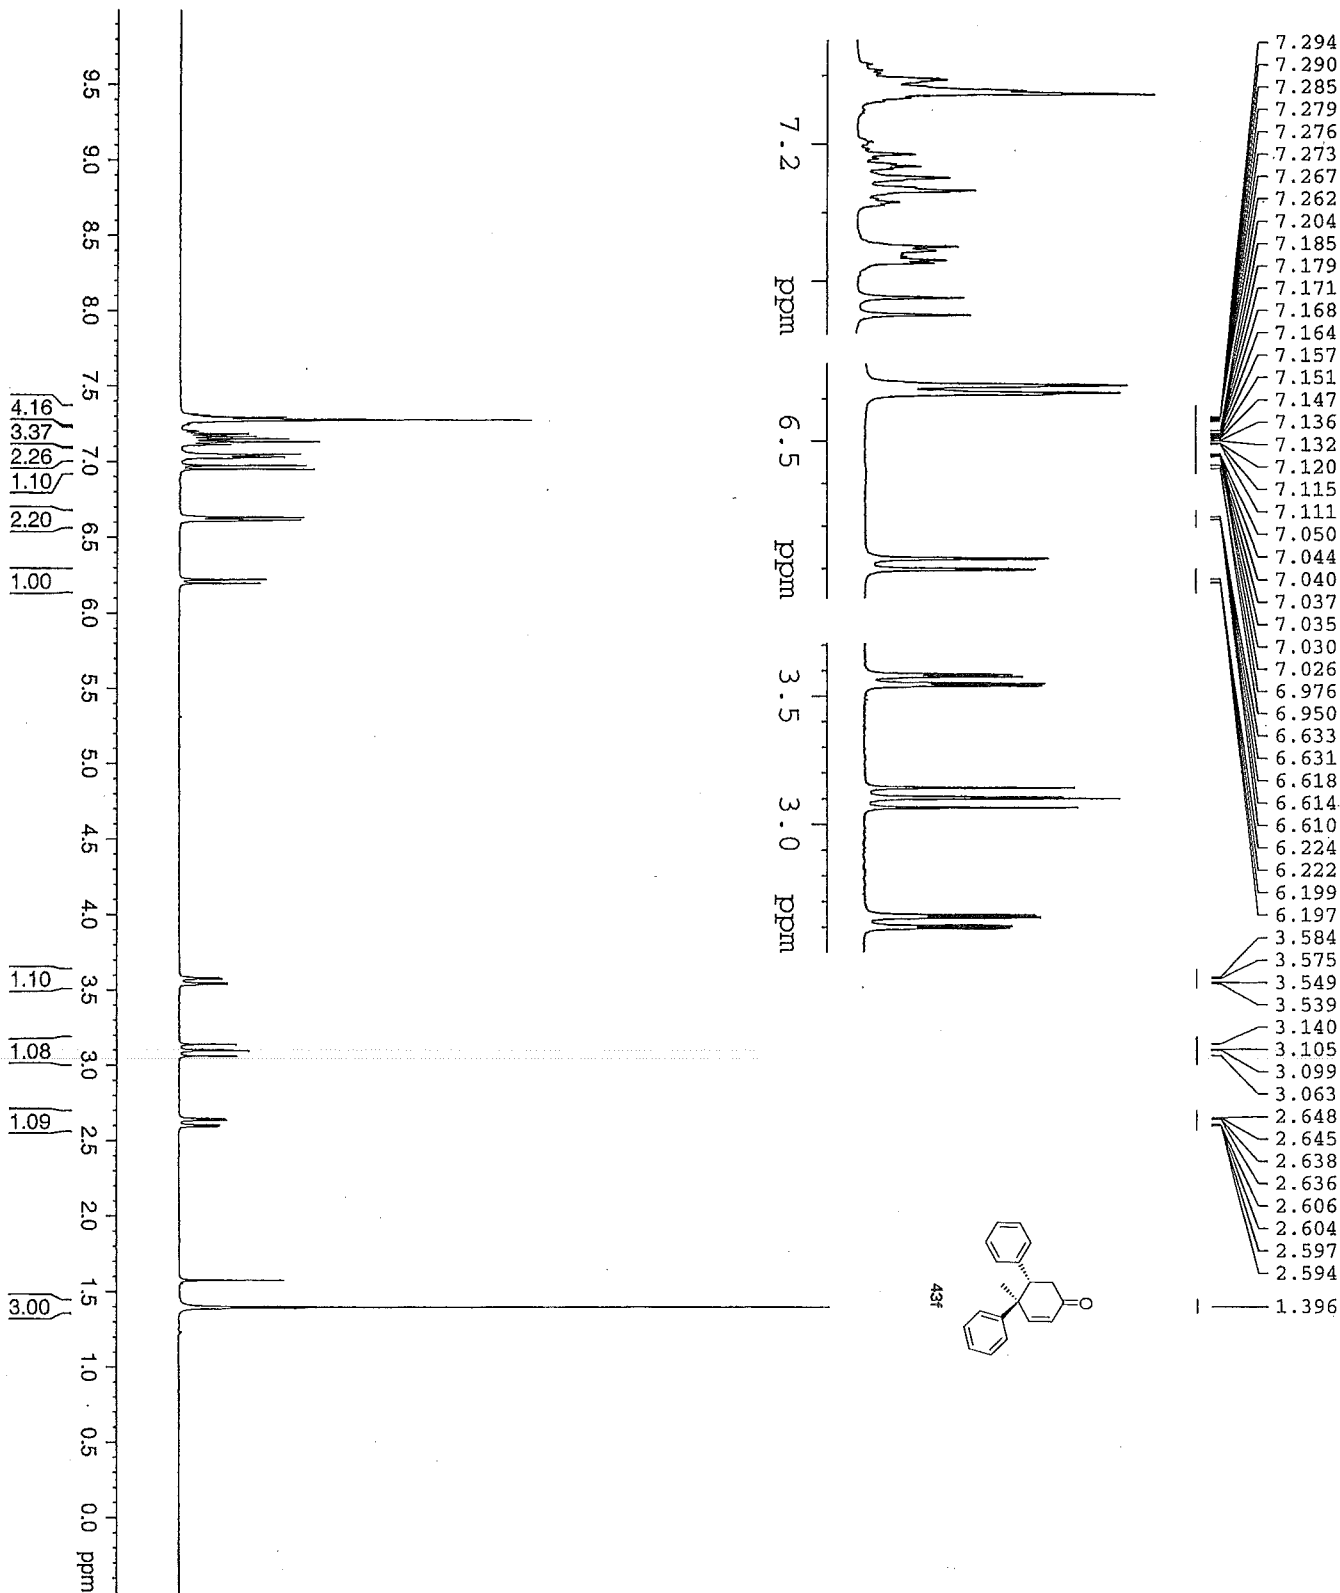

Current Data Parameters  
NAME HT13-85  
EXPNO 3  
PROCNO 1  
DU /m  
USER Rua

F2 - Acquisition Parameters  
Date\_ 20090921  
Time 20.07  
INSTRUM DFX400  
PROBHD 5 mm BBO BB-1H  
PULPROG zgpg30  
TD 32768  
SOLVENT CDCl3  
NS 32  
DS 2  
SWH 6410.256 Hz  
FIDRES 0.195625 Hz  
AQ 2.5559540 sec  
RG 645.1  
DW 78.000 usec  
DE 6.00 usec  
TE 299.2 K  
D1 1.00000000 sec  
TD0 1

===== CHANNEL f1 =====  
NUC1 1H  
P1 13.50 usec  
PL1 -3.00 dB  
SFO1 400.2428017 MHz

F2 - Processing parameters  
SI 32768  
SF 400.2400000 MHz  
WDW EM  
SSB 0  
LB 0.30 Hz  
GB 0  
PC 1.00

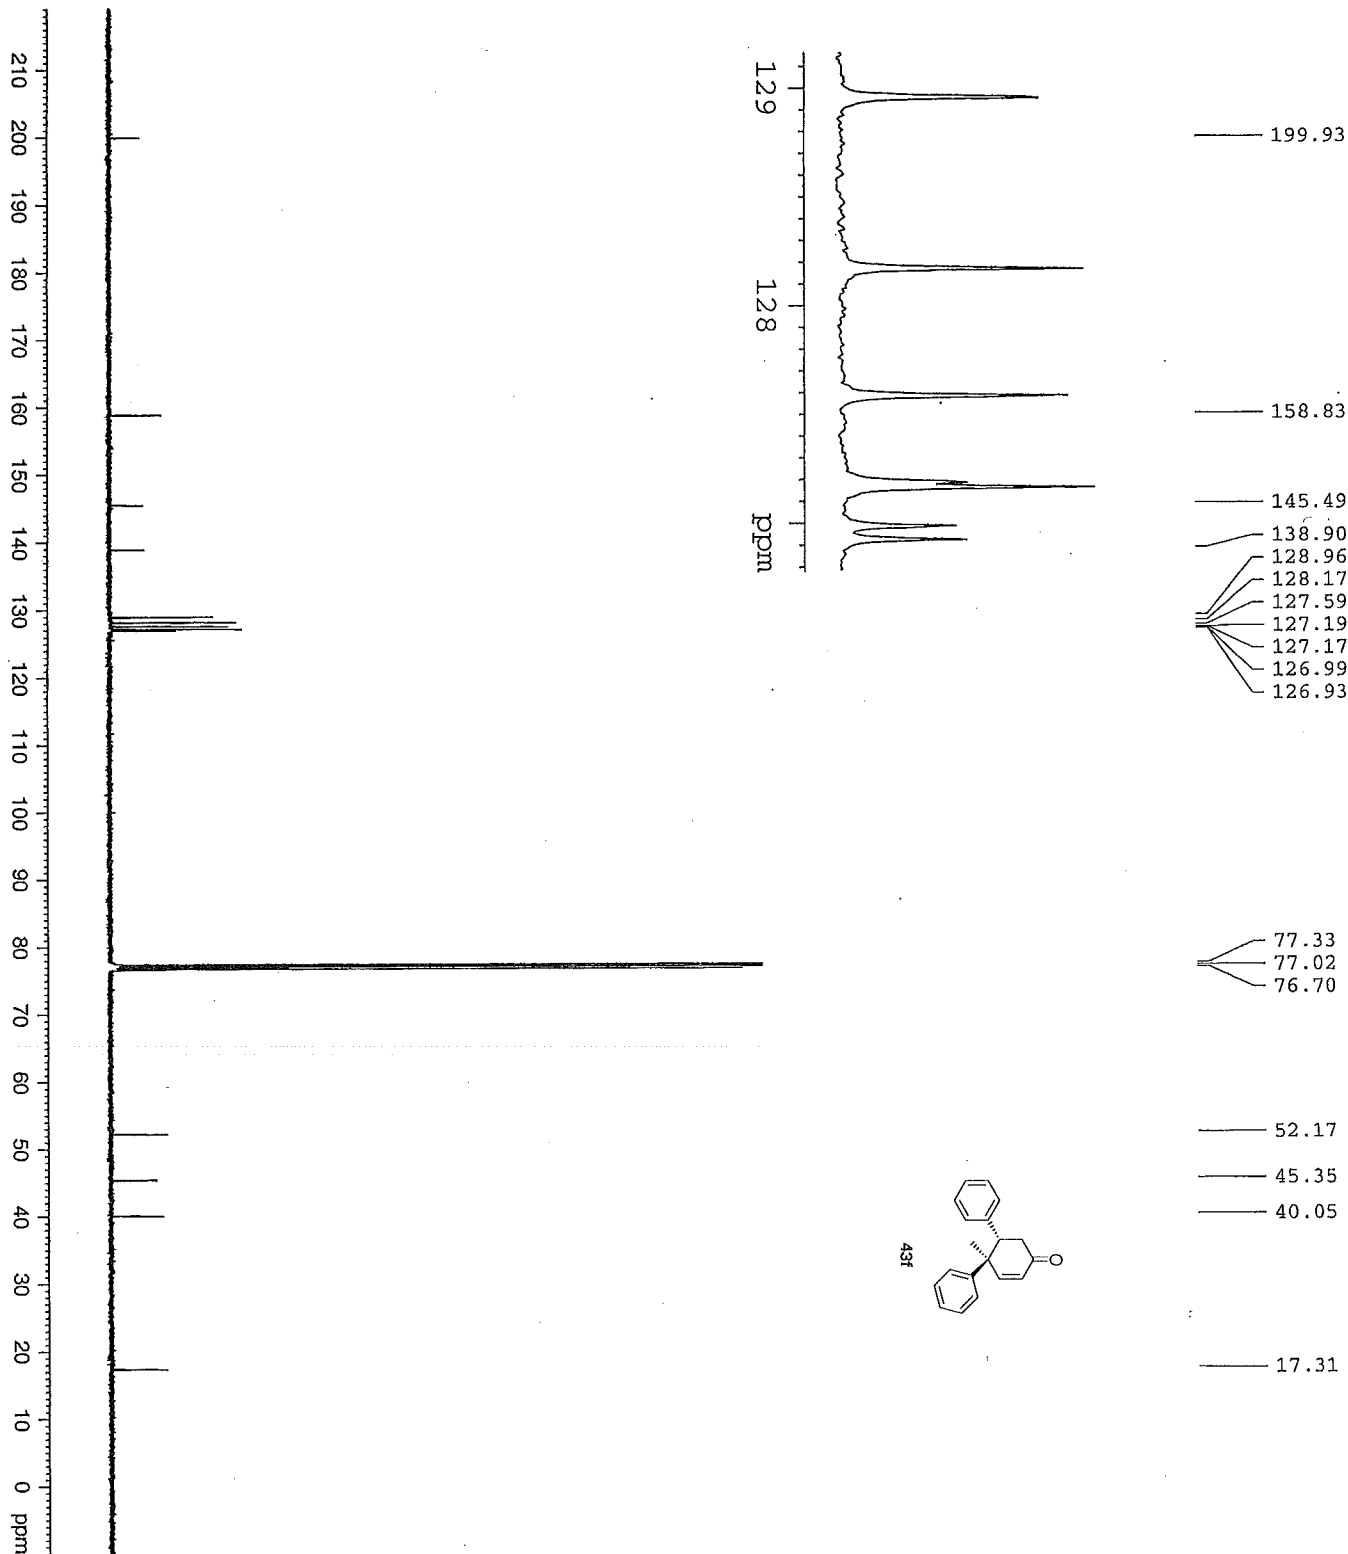

Current Data Parameters  
NAME HX13-65  
EXPNO 5  
PROCNO 1  
PU /m  
USER Haa

F2 - Acquisition Parameters  
Date\_ 20090921  
Time 21.49  
INSTRUM DFK400  
PROBHD 5 mm BBO BB-1H  
PULPROG zgpg30  
TD 65536  
FIDRES 0.364735  
SOLVENT CDCl3  
NS 1362  
DS 4  
SWH 23980.814 Hz  
FIDRES 0.365918 Hz  
AQ 1.3664735 sec  
RG 9195.2  
RW 20.850 usec  
DE 6.00 usec  
TE 299.2 K  
D1 2.00000000 sec  
d11 0.03000000 sec  
DELTA 1.89999998 sec  
TD0 1

==== CHANNEL f1 =====  
NUC1 13C  
P1 8.30 usec  
PL1 -3.00 dB  
SFO1 100.6504921 MHz

==== CHANNEL f2 =====  
CPDPRG2 waltz16  
NUC2 1H  
PCPD2 90.00 usec  
PL2 -3.00 dB  
PL12 15.00 dB  
PL13 15.00 dB  
SFO2 400.2416010 MHz

F2 - Processing Parameters  
SI 32768  
SF 100.6404280 MHz  
WDW EM  
SSB 0  
LB 1.00 Hz  
GB 0  
PC 1.00



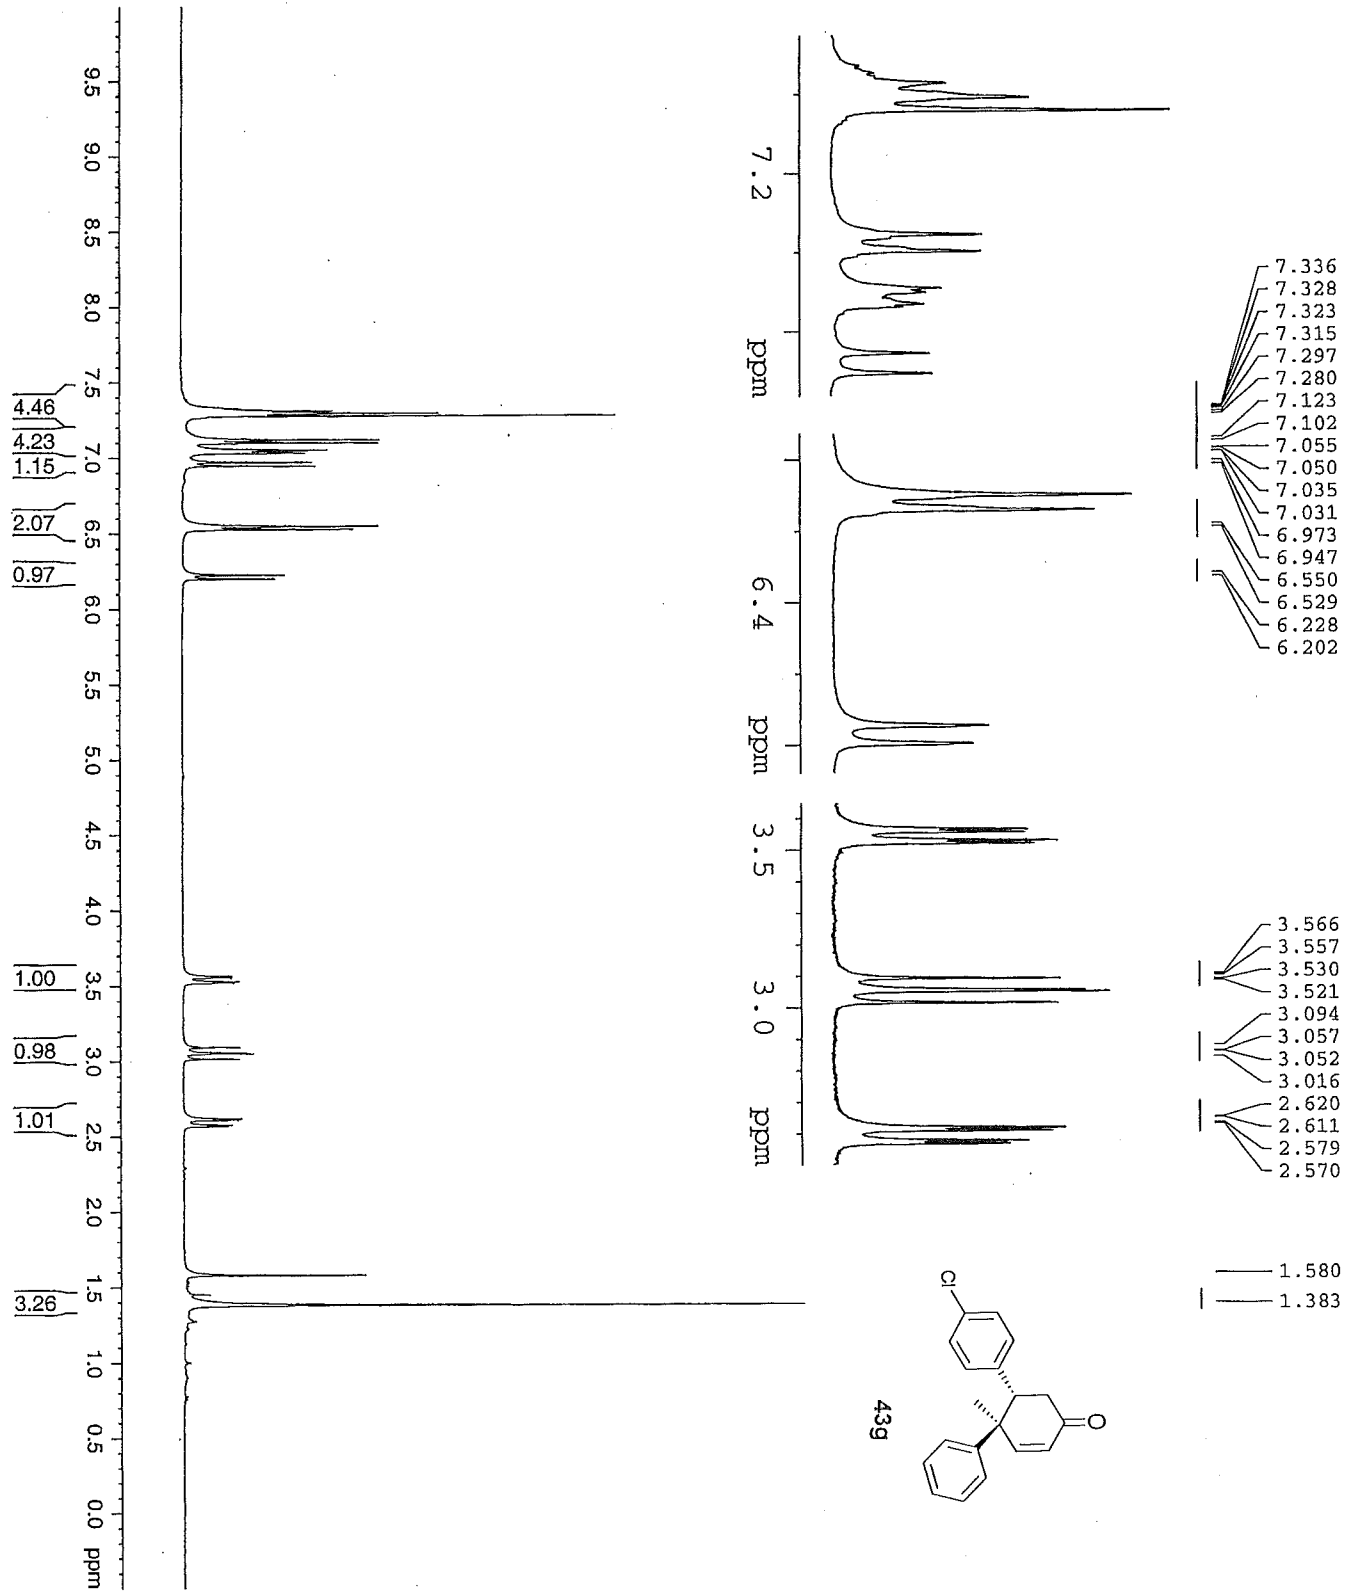

Current Data Parameters  
NAME HY14-12  
EXPNO 3  
PROCNO 1  
PU /m  
USER Hua

F2 - Acquisition Parameters  
Date\_ 20091022  
Time 12.36  
INSTRUM DEK400  
PROBHD 5 mm BBO BB-1H  
PULPROG zg30  
TD 32768  
SOLVENT CDCl3  
NS 32  
DS 2  
SWH 6410.256 Hz  
FIDRES 0.195625 Hz  
AQ 2.5559540 sec  
RG 11024  
DM 78.000 usec  
DE 26.00 usec  
TE 297.2 K  
D1 1.0000000 sec  
TD0 1

==== CHANNEL f1 =====  
NUC1 1H  
P1 13.50 usec  
PL1 -3.00 dB  
SFO1 400.2478017 MHz

F2 - Processing parameters  
SI 32768  
SF 400.2450000 MHz  
WDW EM  
SSB 0  
LB 0.30 Hz  
GB 0  
PC 1.00

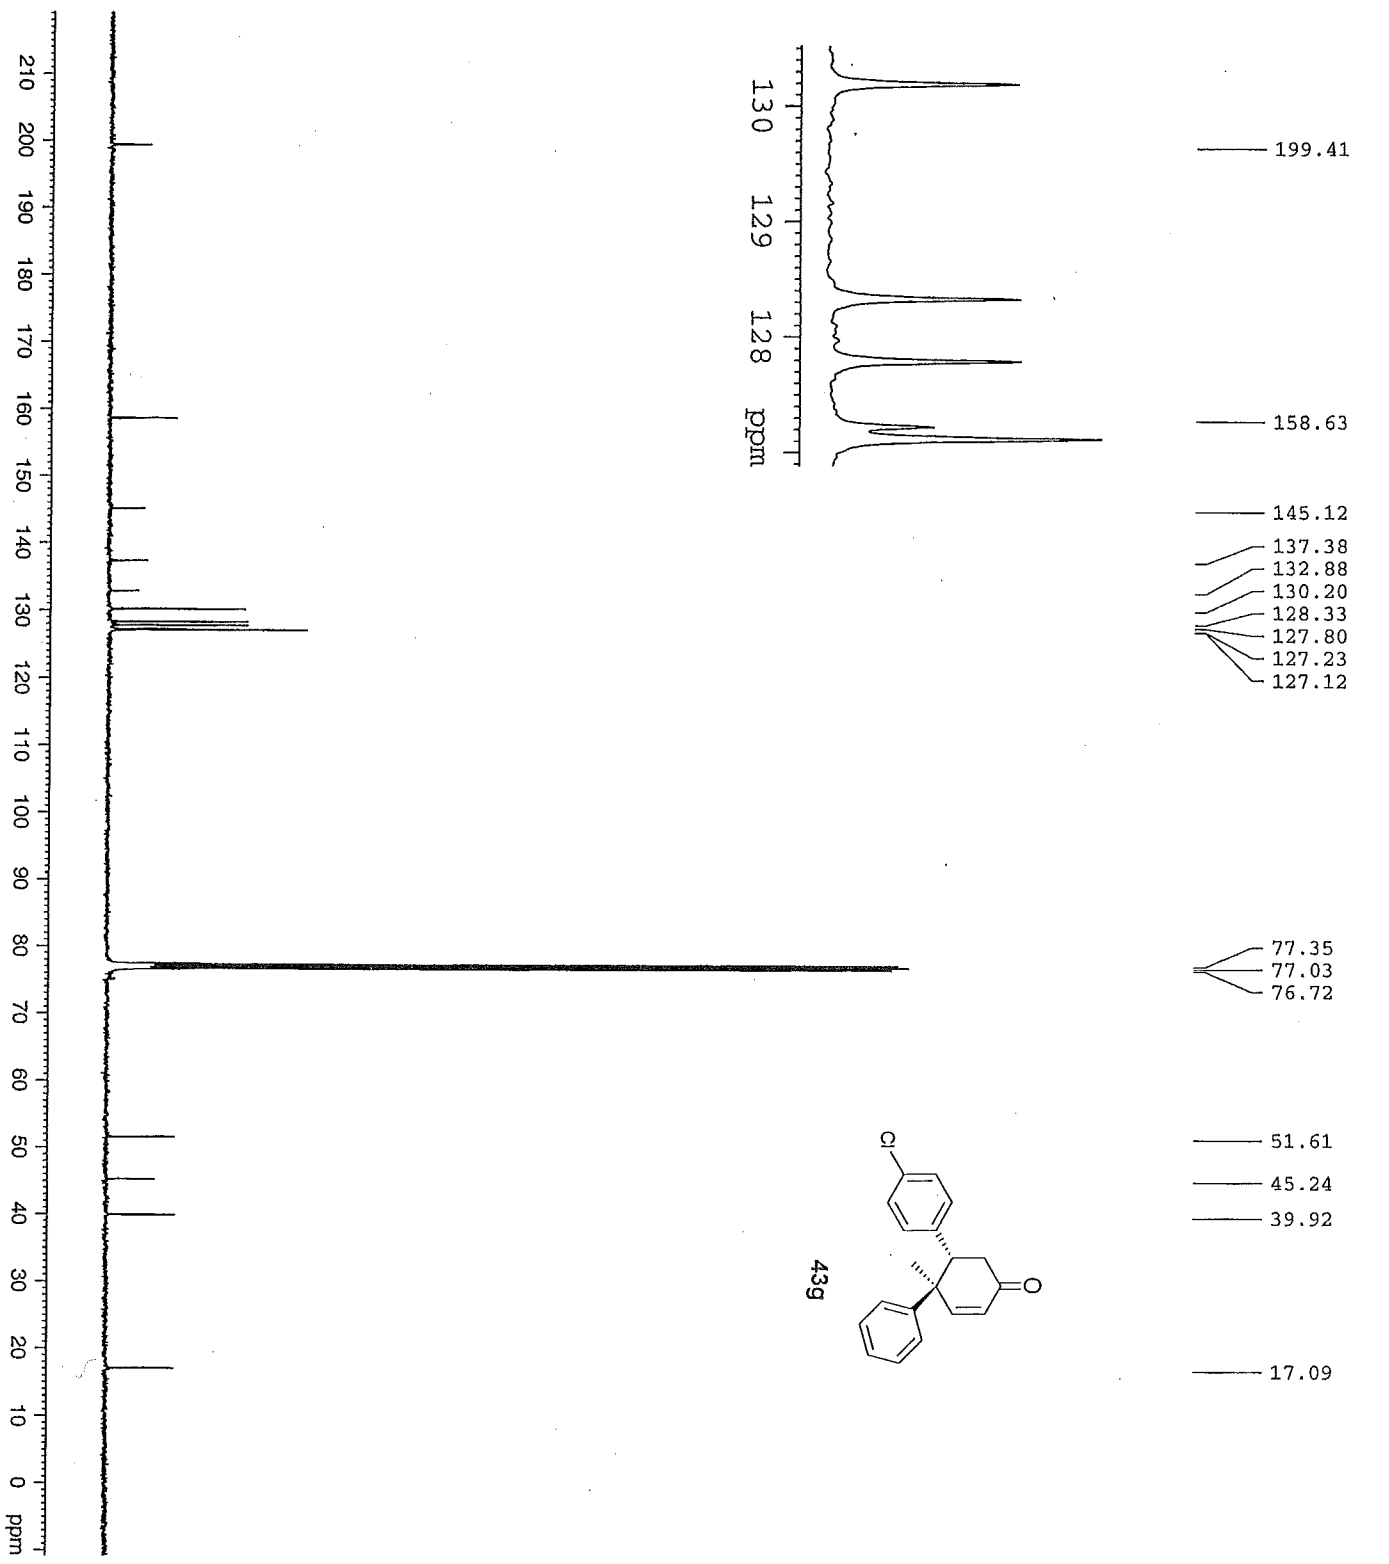

Current Data Parameters  
NAME HYL4-12  
EXPNO 8  
PROCNO 1  
DU /m  
USER Hua

F2 - Acquisition Parameters  
Date\_ 20091029  
Time 14.48  
INSTRUM DPX400  
PROBHD 5 mm BBO BB-1H  
PULPROG zgpg30  
TD 65536  
SOLVENT CDCl<sub>3</sub>  
NS 2704  
DS 4  
SWH 23980.814 Hz  
FIDRES 0.365918 Hz  
AQ 1.3664756 sec  
RG 13004  
DW 20.850 usec  
DE 6.00 usec  
TE 298.2 K  
D1 2.00000000 sec  
d11 0.03000000 sec  
DELTA 1.89999998 sec  
TD0 1

===== CHANNEL f1 =====  
NUC1 13C  
P1 8.30 usec  
PL1 -3.00 dB  
SFO1 100.6517495 MHz

===== CHANNEL f2 =====  
CPDPRG2 waltz16  
NUC2 1H  
PCPD2 90.00 usec  
PL2 -3.00 dB  
PL12 15.00 dB  
PL13 15.00 dB  
SFO2 400.2466010 MHz

F2 - Processing parameters  
SI 32768  
SF 100.6416850 MHz  
WDW EM  
SSB 0  
LB 3.00 Hz  
GB 0  
PC 1.40

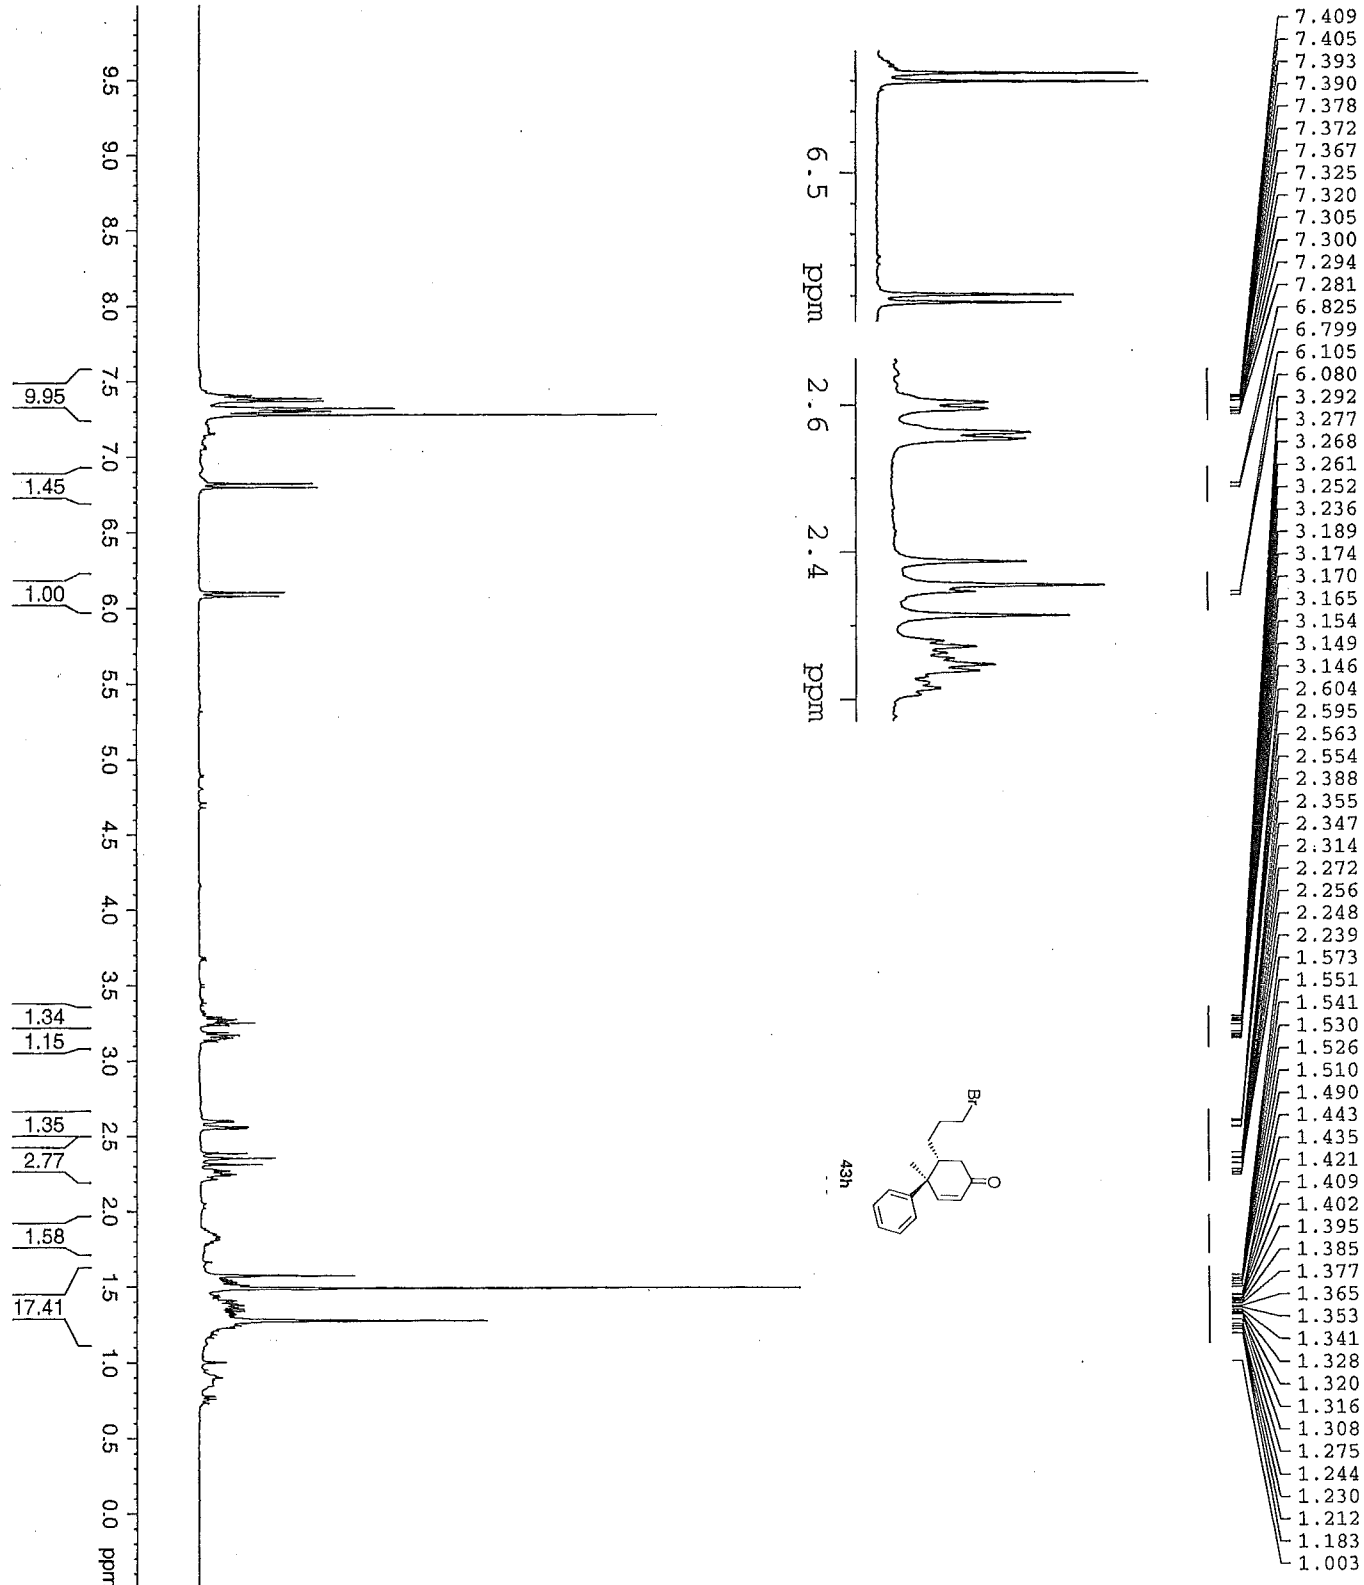

Current Data Parameters  
NAME HY15-57  
EXPNO 3  
PROCNO 1  
PU /m  
USER Hua

F2 - Acquisition Parameters  
Date\_ 20100224  
Time 21.59  
INSTRUM DPX400  
PROBHD 5 mm BBO BB-1H  
PULPROG zg30  
TD 32768  
SOLVENT CDCl3  
NS 32  
DS 2  
SWH 6410.256 Hz  
FIDRES 0.195625 Hz  
AQ 2.5559540 sec  
RG 645.1  
RW 78.000 usec  
DE 6.00 usec  
TE 298.2 K  
D1 1.00000000 sec  
TD0 1

===== CHANNEL f1 =====  
NUC1 1H  
P1 13.50 usec  
PLA -3.00 dB  
SF01 400.2478017 MHz

F2 - Processing parameters  
SI 32768  
SF 400.2450000 MHz  
WDW EM  
SSB 0  
GB 0  
PC 1.00

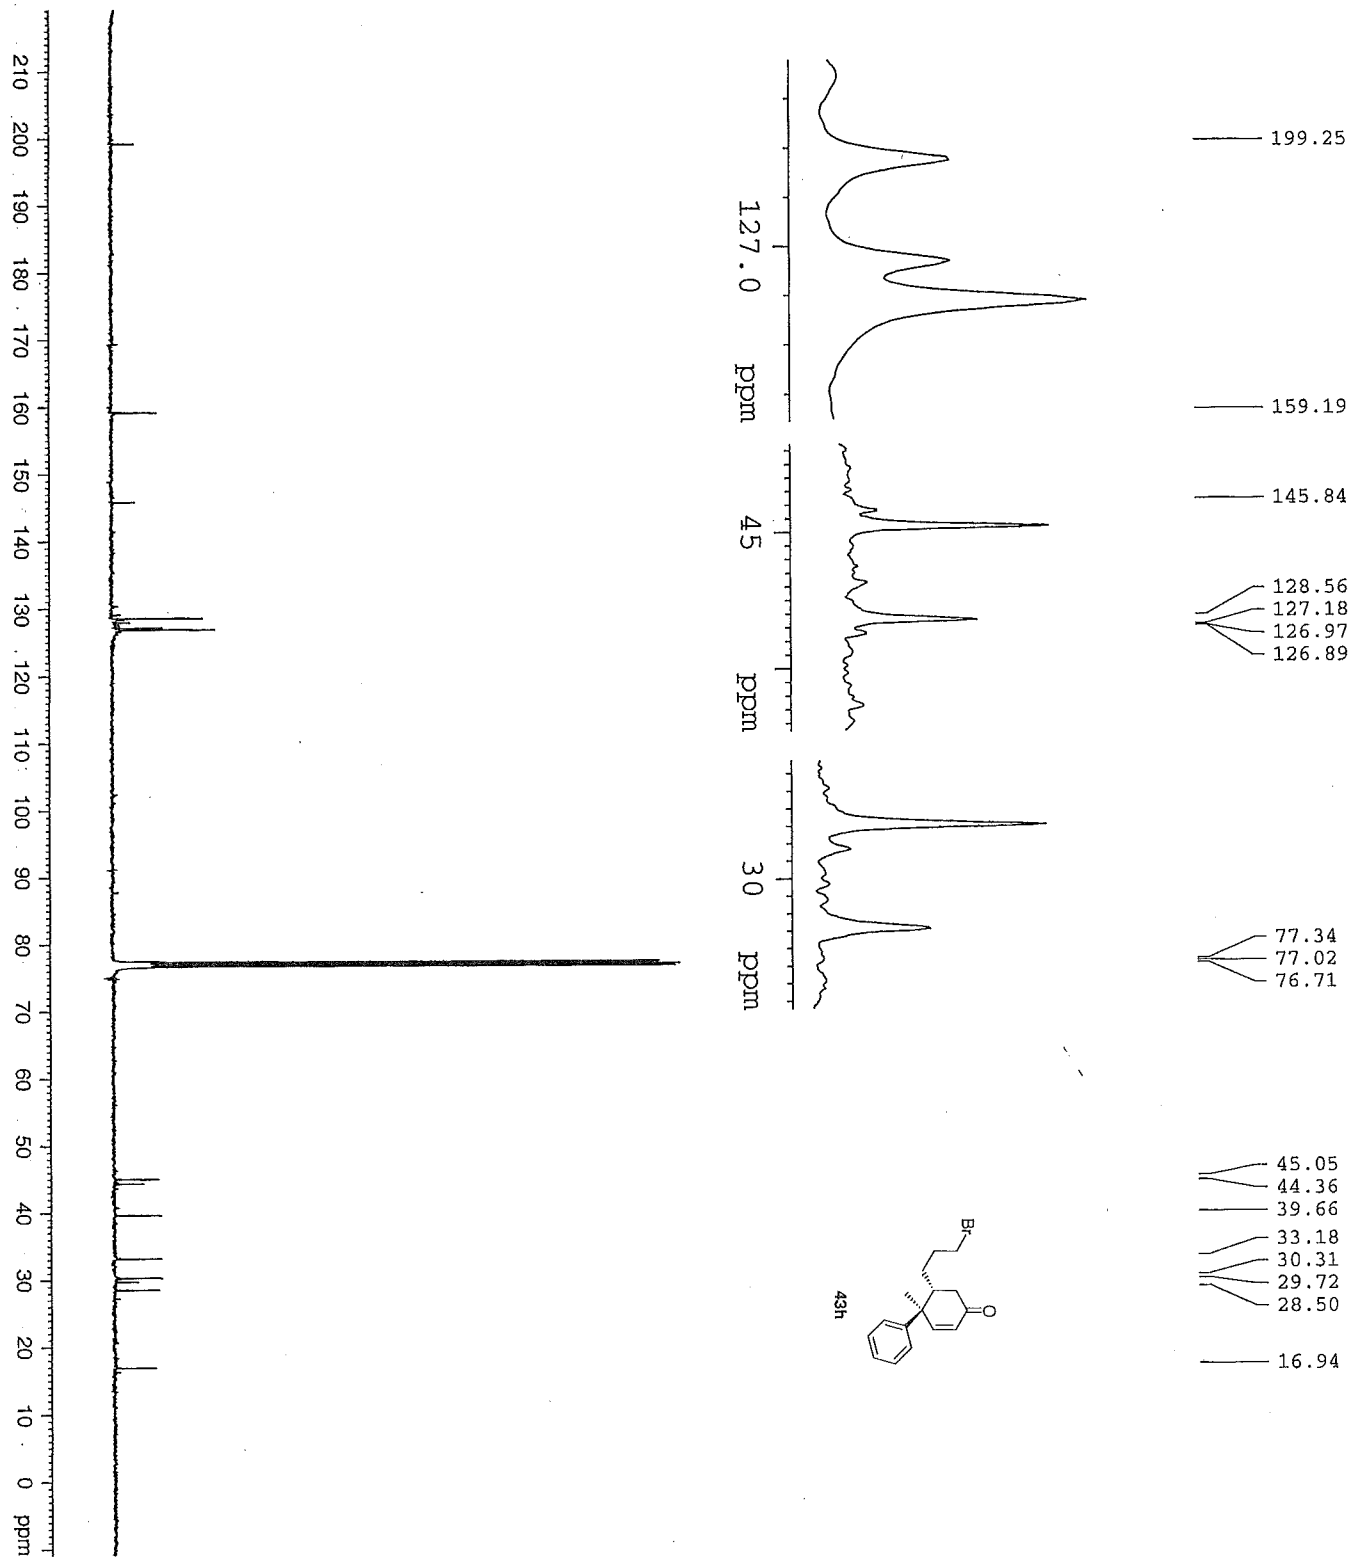

Current Data Parameters  
NAME HYL5-57  
EXPNO 5  
PROCNO 1  
IN 1  
USER Hua

F2 - Acquisition Parameters  
Date\_ 20100228  
Time 19.06  
INSTRUM DPX400  
PROBHD 5 mm BBO BB-1H  
PULPROG zgpg30  
TD 65536  
SOLVENT CDCl3  
NS 3024  
DS 4  
SWH 23580.814 Hz  
FIDRES 0.365818 Hz  
AQ 1.364756 sec  
RG 5160  
RG 20.850 usec  
DW 6.09 usec  
DE 300.2 K  
TE 2.00000000 sec  
d1 0.03000000 sec  
DELTA 1.89999998 sec  
TD0 1

==== CHANNEL f1 =====  
NUC1 13C  
P1 8.30 usec  
PL1 -3.00 dB  
SFO1 100.6517495 MHz

==== CHANNEL f2 =====  
CPDPRG2 waltz16  
NUC2 1H  
P2 90.00 usec  
PL2 -3.00 dB  
PL3 15.00 dB  
PL4 15.00 dB  
SFO2 400.2466010 MHz

F2 - Processing parameters  
SI 32768  
SF 100.6416850 MHz  
WDW EM  
SSB 0  
LB 3.00 Hz  
GB 0  
PC 1.40

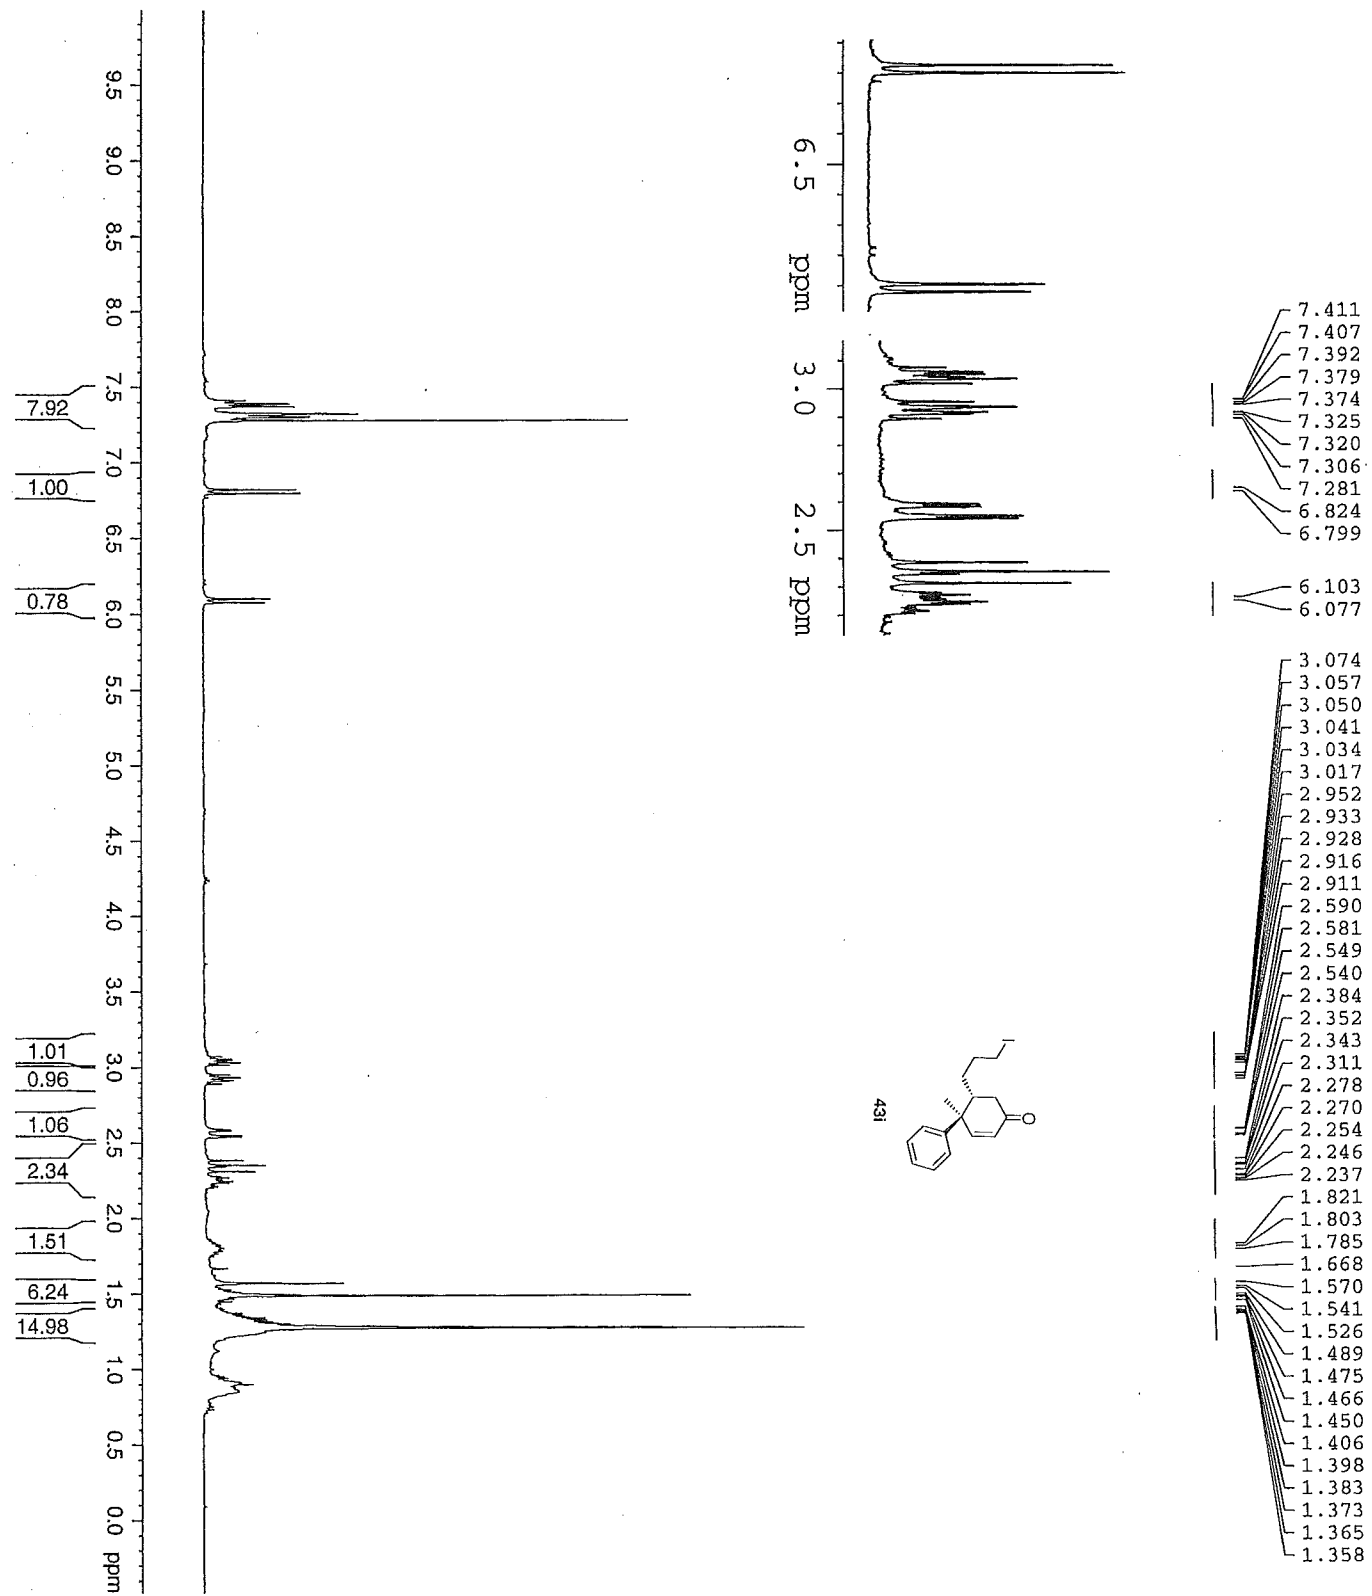

Current Data Parameters  
NAME HY15-10  
EXPNO 5  
PROCNO 1  
DU /m  
USER Hua

F2 - Acquisition Parameters  
Date\_ 20100211  
Time 10.47  
INSTRUM DEX400  
PROBHD 5 mm BBO BB-1H  
PULPROG zgpg30  
TD 32768  
SOLVENT CDCl3  
NS 32  
DS 2  
SWH 6410.256 Hz  
FIDRES 0.18625 Hz  
AQ 2.5355340 sec  
RG 574.7  
DW 78.000 usec  
DE 6.00 usec  
TE 298.2 K  
D1 1.00000000 sec  
TD0 1

===== CHANNEL f1 =====  
NUC1 1H  
P1 13.50 usec  
PL1 -3.00 dB  
SFO1 400.2478017 MHz

F2 - Processing parameters  
SI 32768  
SF 400.2450000 MHz  
WDW EM  
SSB 0  
LB 0.30 Hz  
GB 0  
PC 1.00

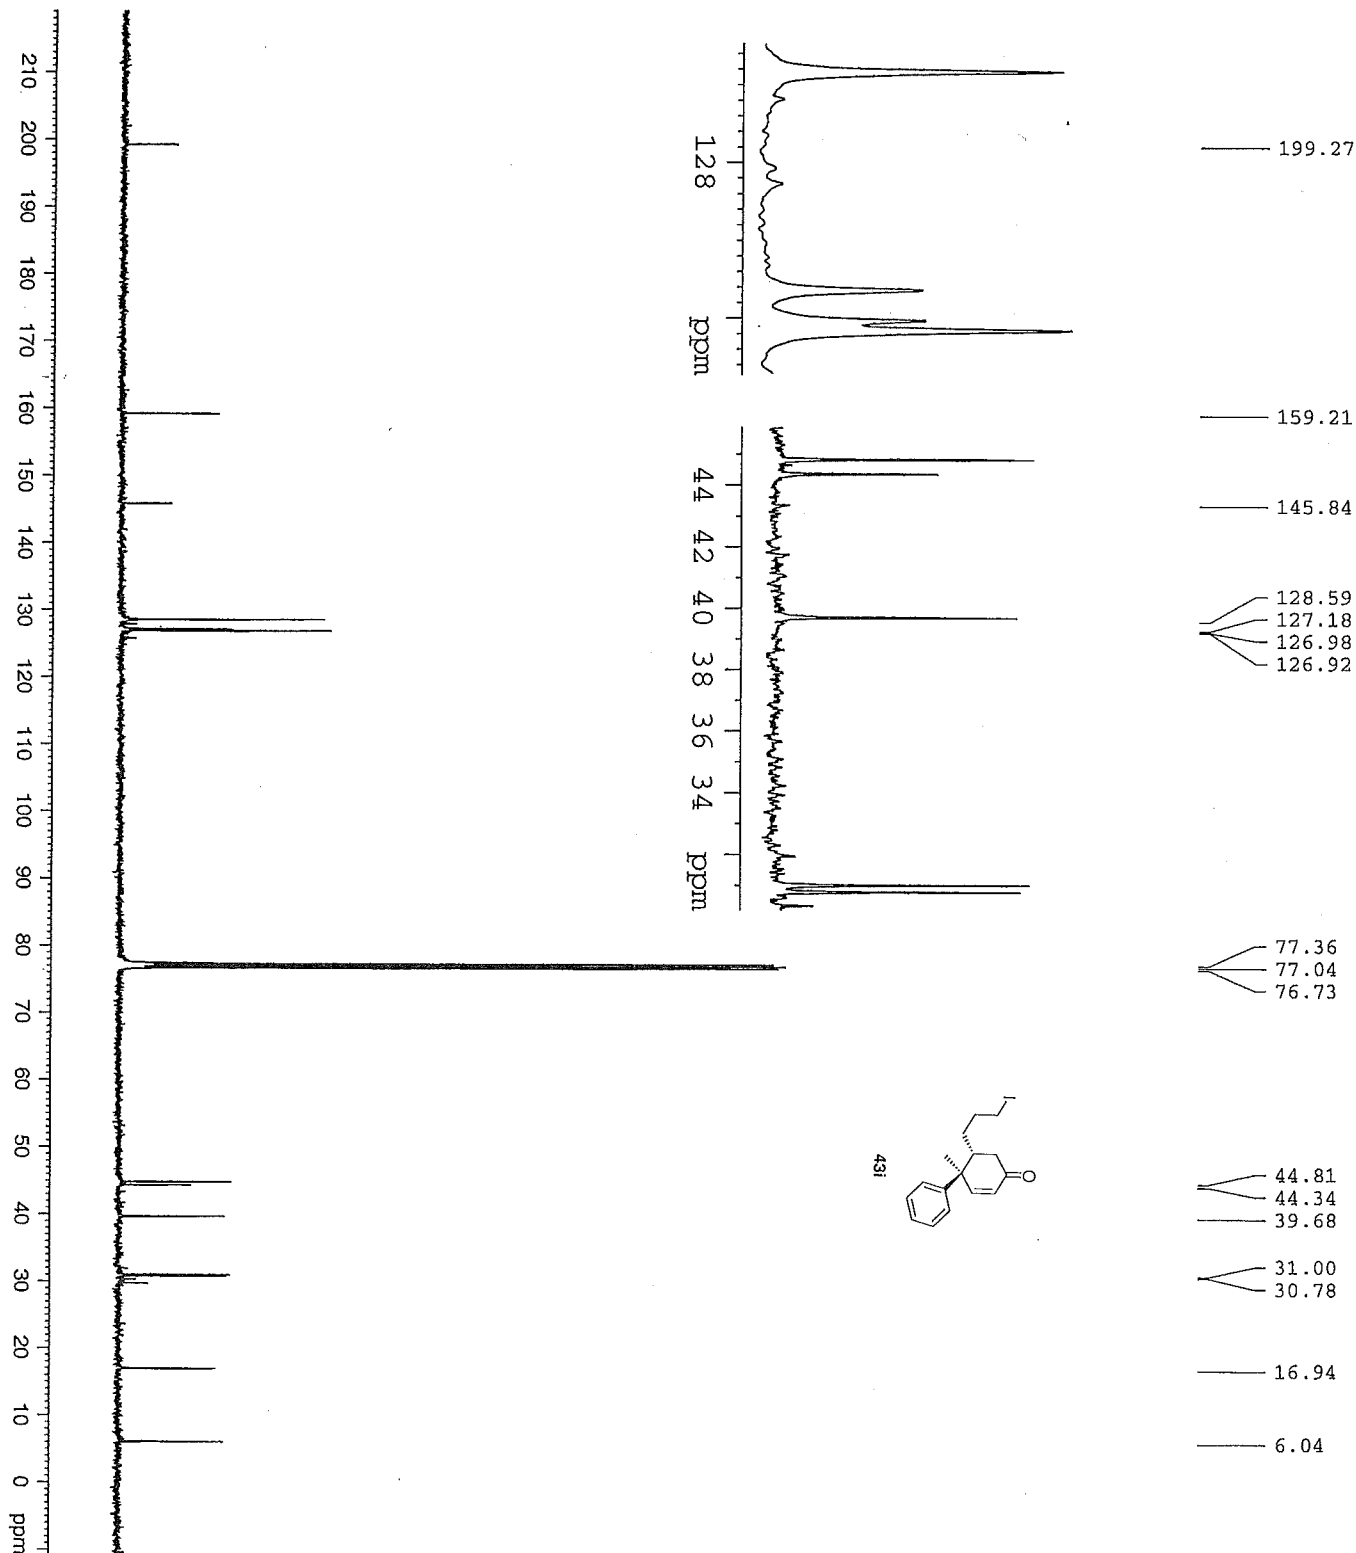

Current Data Parameters  
NAME HYL5-10  
EXNO 4  
PROCNO 1  
DT /m  
USER Hua

F2 - Acquisition Parameters  
Date\_ 20091231  
Time\_ 17.18  
INSTRUM DPX400  
PROBHD 5 mm BBO HB-1H  
PULPROG zgpg30  
TD 65536  
SOLVENT CDCl3  
NS 648  
DS 4  
SWH 23980.814 Hz  
FIDRES 0.355918 Hz  
AQ 1.366756 sec  
RG 32728  
DB 20.850 usec  
DE 6.00 usec  
TE 299.2 K  
D1 2.0000000 sec  
d11 0.0300000 sec  
DELTA 1.8999998 sec  
TD0 1

==== CHANNEL f1 =====  
NUC1 13C  
P1 8.30 usec  
PL1 -3.00 dB  
SFO1 100.6517495 MHz

==== CHANNEL f2 =====  
CPDPRG2 waltz16  
NUC2 1H  
PCPD2 90.00 usec  
PL2 -3.00 dB  
PL12 15.00 dB  
PL13 15.00 dB  
SFO2 400.2466010 MHz

F2 - Processing parameters  
SI 32768  
SF 100.6416850 MHz  
WDW EM  
SSB 0  
LB 3.00 Hz  
GB 0  
PC 1.40

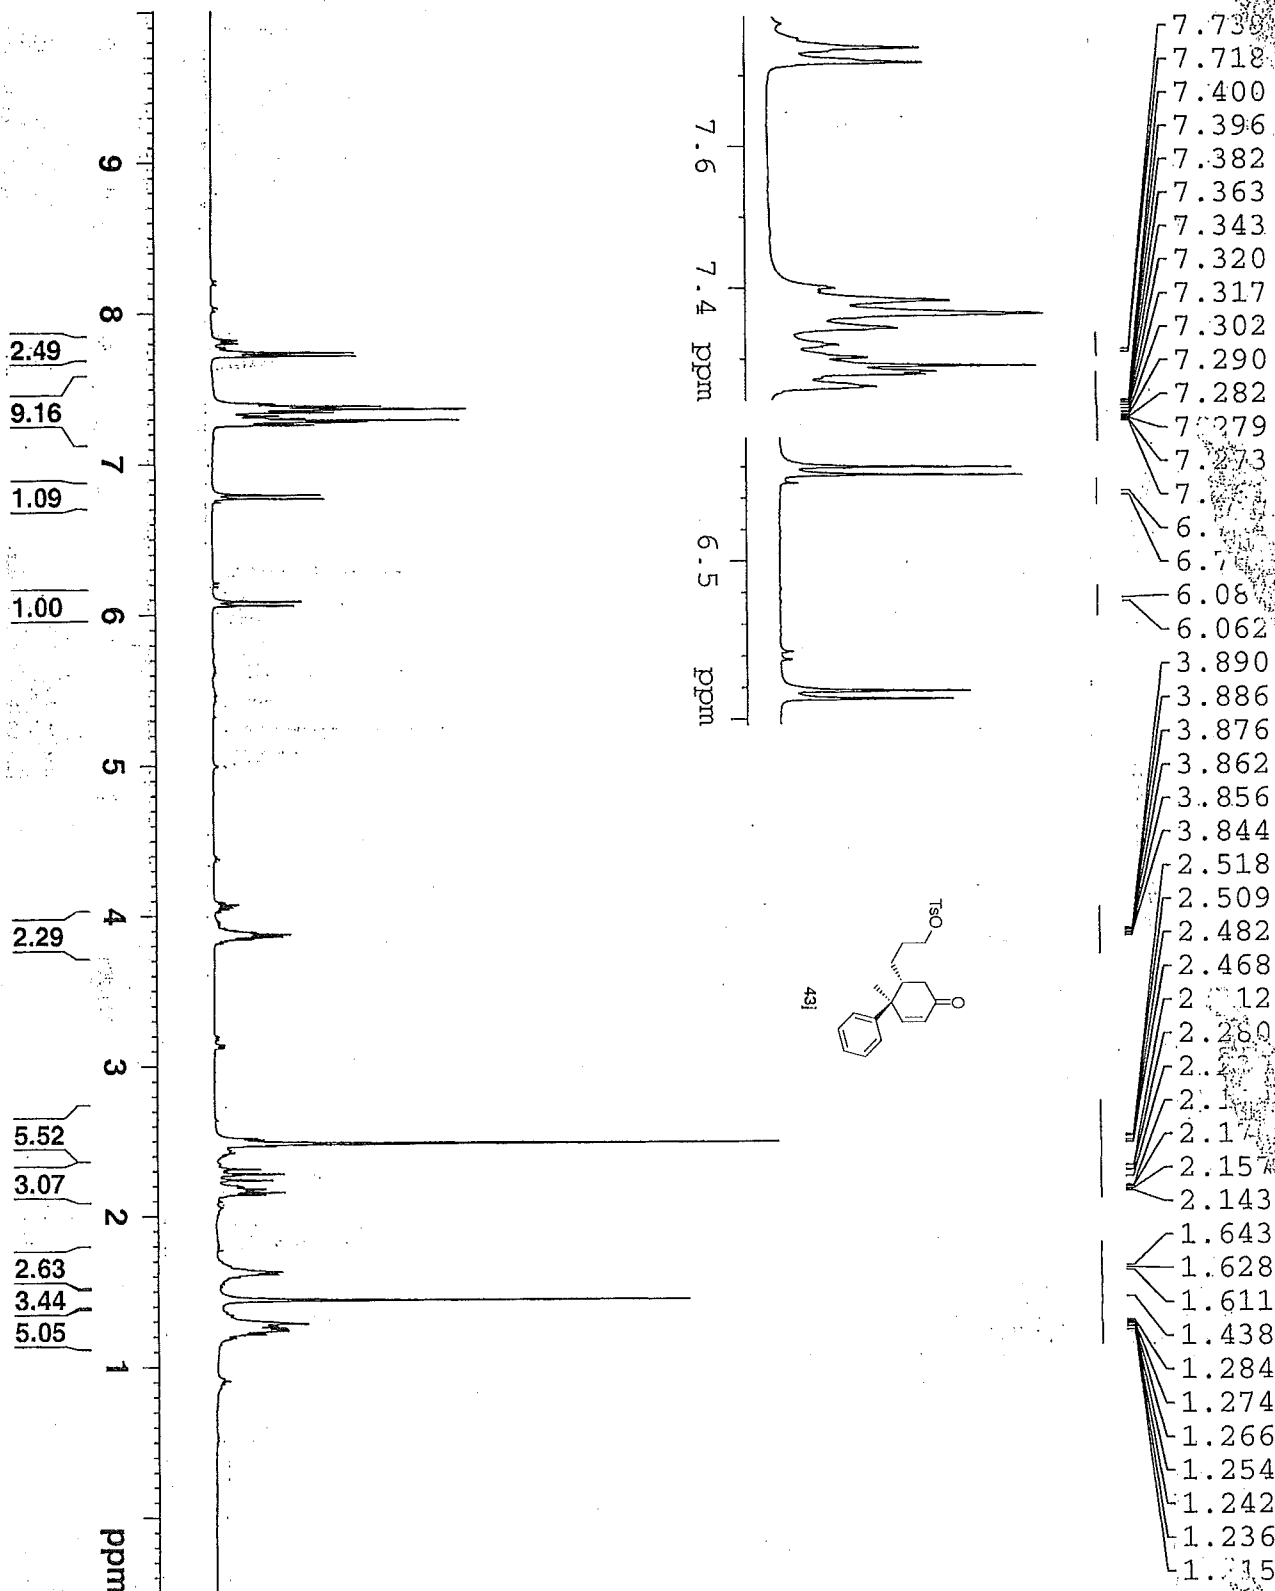

|         |                |
|---------|----------------|
| NAME    | HYL-09         |
| EXPNO   | 1              |
| PROCNO  | 20100309       |
| F2      | 22.18          |
| INSTRUM | probehd        |
| PROBHD  | 5 mm PABBO BB- |
| PULPROG | zg30           |
| TD      | 32768          |
| SOLVENT | CDCl3          |
| NS      | 32             |
| DS      | 2              |
| SWH     | 6410.256       |
| FIDRES  | 0.195625       |
| AQ      | 2.5559540      |
| RG      | 128            |
| DW      | 78.000         |
| DE      | 6.50           |
| TE      | 298.3          |
| D1      | 2.0000000      |
| TD0     | 1              |

  

|                        |             |
|------------------------|-------------|
| ===== CHANNEL f1 ===== |             |
| NUC1                   | 1H          |
| P1                     | 14.00       |
| PL1                    | 0.00        |
| PL1W                   | 10.27361584 |
| SFO1                   | 400.1378009 |
| SI                     | 32768       |
| SF                     | 400.1350000 |
| WDW                    | EM          |
| SSB                    | 0           |
| LB                     | 0.30        |
| GB                     | 0           |
| PC                     | 1.00        |

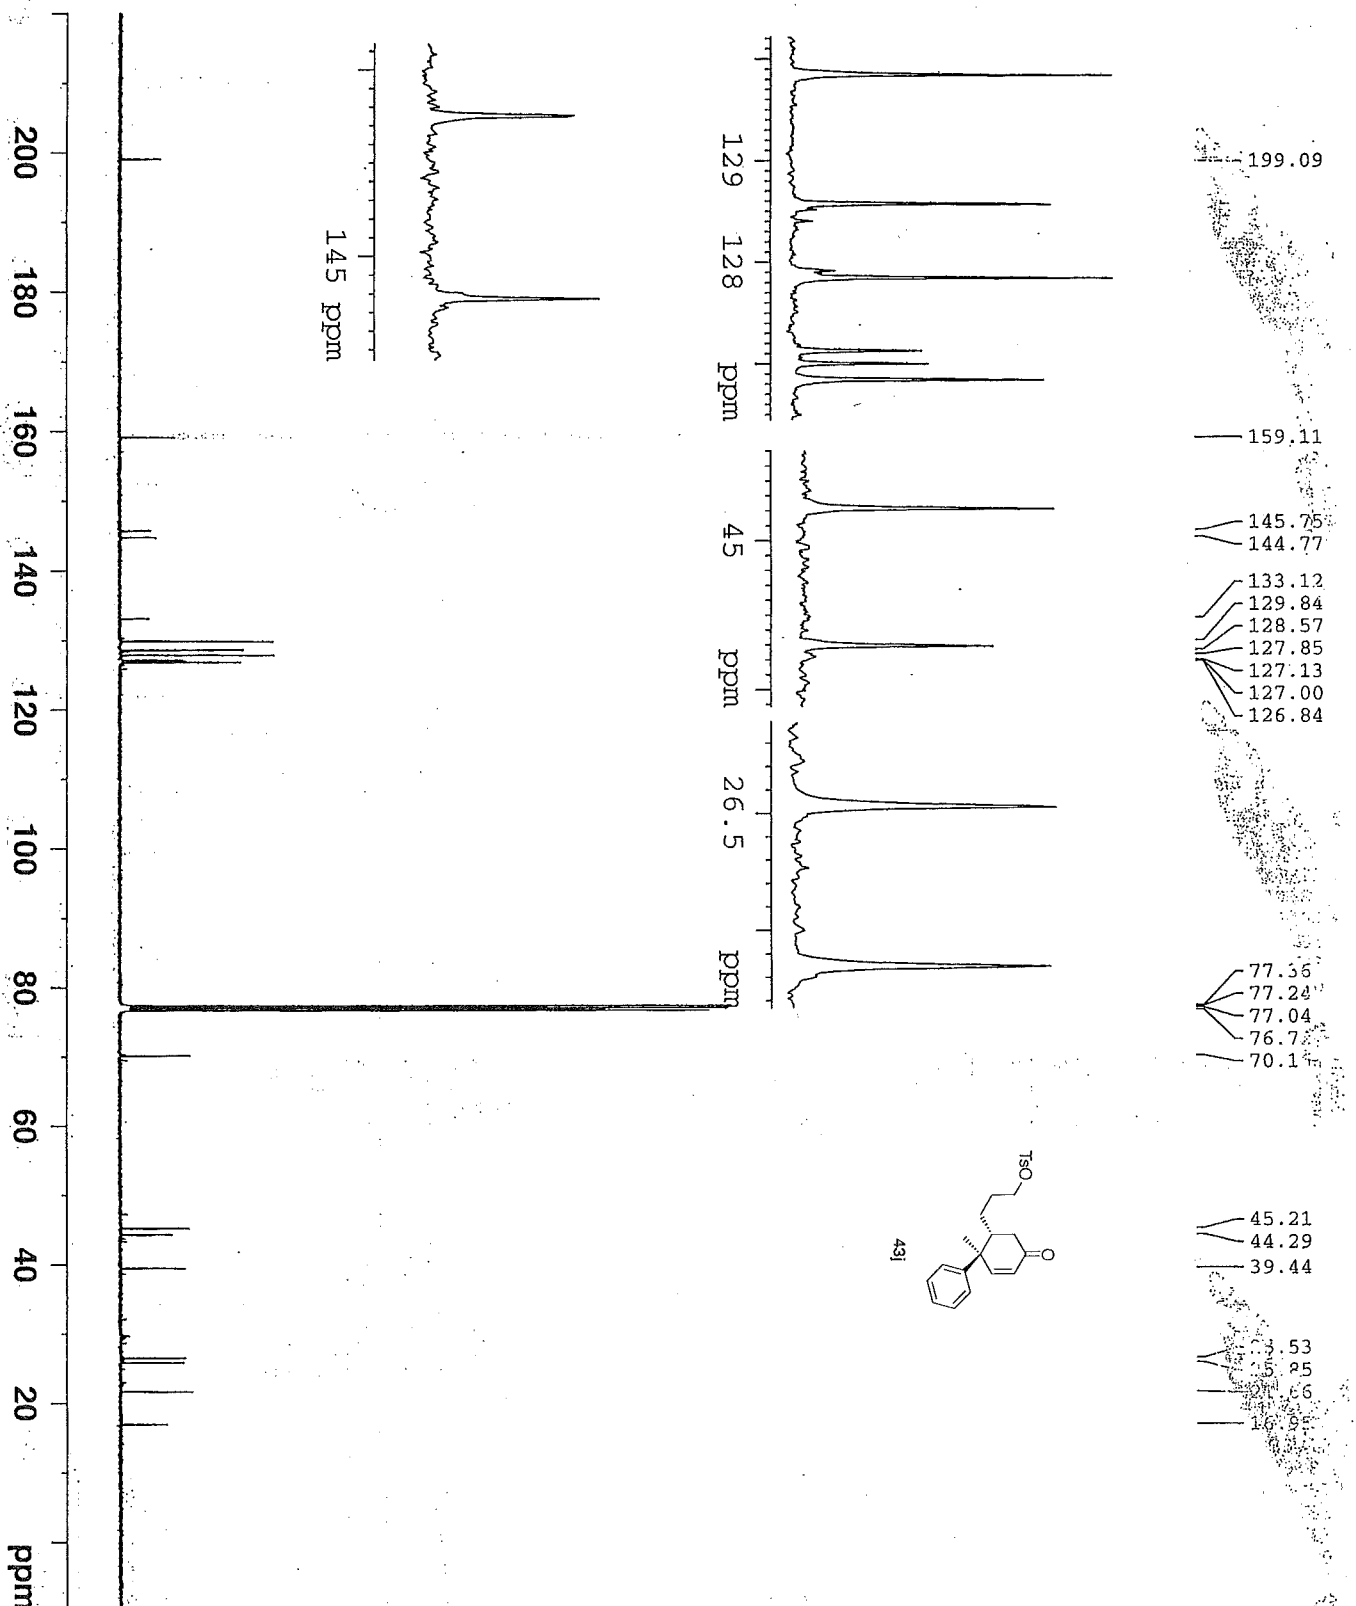

|         |                |
|---------|----------------|
| NAME    | HY15-69        |
| EXPNO   | 8              |
| PROCNO  | 20150006       |
| Date_   | 20150006       |
| Time    | 11:00          |
| INSTRUM | spect          |
| PROBHD  | 5 mm PABBO BB- |
| PULPROG | zgpg30         |
| TD      | 65536          |
| SOLVENT | CDCl3          |
| NS      | 3024           |
| DS      | 4              |
| SWH     | 25125.629      |
| FIDRES  | 0.383387       |
| AQ      | 1.3042164      |
| RG      | 18390.4        |
| DW      | 19.900         |
| DE      | 6.50           |
| TE      | 299.1          |
| D1      | 2.0000000      |
| D11     | 0.0300000      |
| TD0     | 1              |

  

|                        |             |
|------------------------|-------------|
| ===== CHANNEL f1 ===== |             |
| NUC1                   | 13C         |
| P1                     | 9.00        |
| PL1                    | -2.00       |
| PL1W                   | 46.89702606 |
| SFO1                   | 100.6255966 |

  

|                        |             |
|------------------------|-------------|
| ===== CHANNEL f2 ===== |             |
| CPDPRG2                | waltz16     |
| NUC2                   | 1H          |
| PCPD2                  | 90.00       |
| PL2                    | 0.00        |
| PL12                   | 16.16       |
| PL13                   | 17.00       |
| PL12W                  | 10.27361584 |
| PL13W                  | 0.24872722  |
| SFO2                   | 0.20498557  |
| SI                     | 400.1366005 |
| SF                     | 32768       |
| WDW                    | 100.6140260 |
| SSB                    | EM          |
| LB                     | 0           |
| GB                     | 1.00        |
| PC                     | 0           |
|                        | 1.40        |



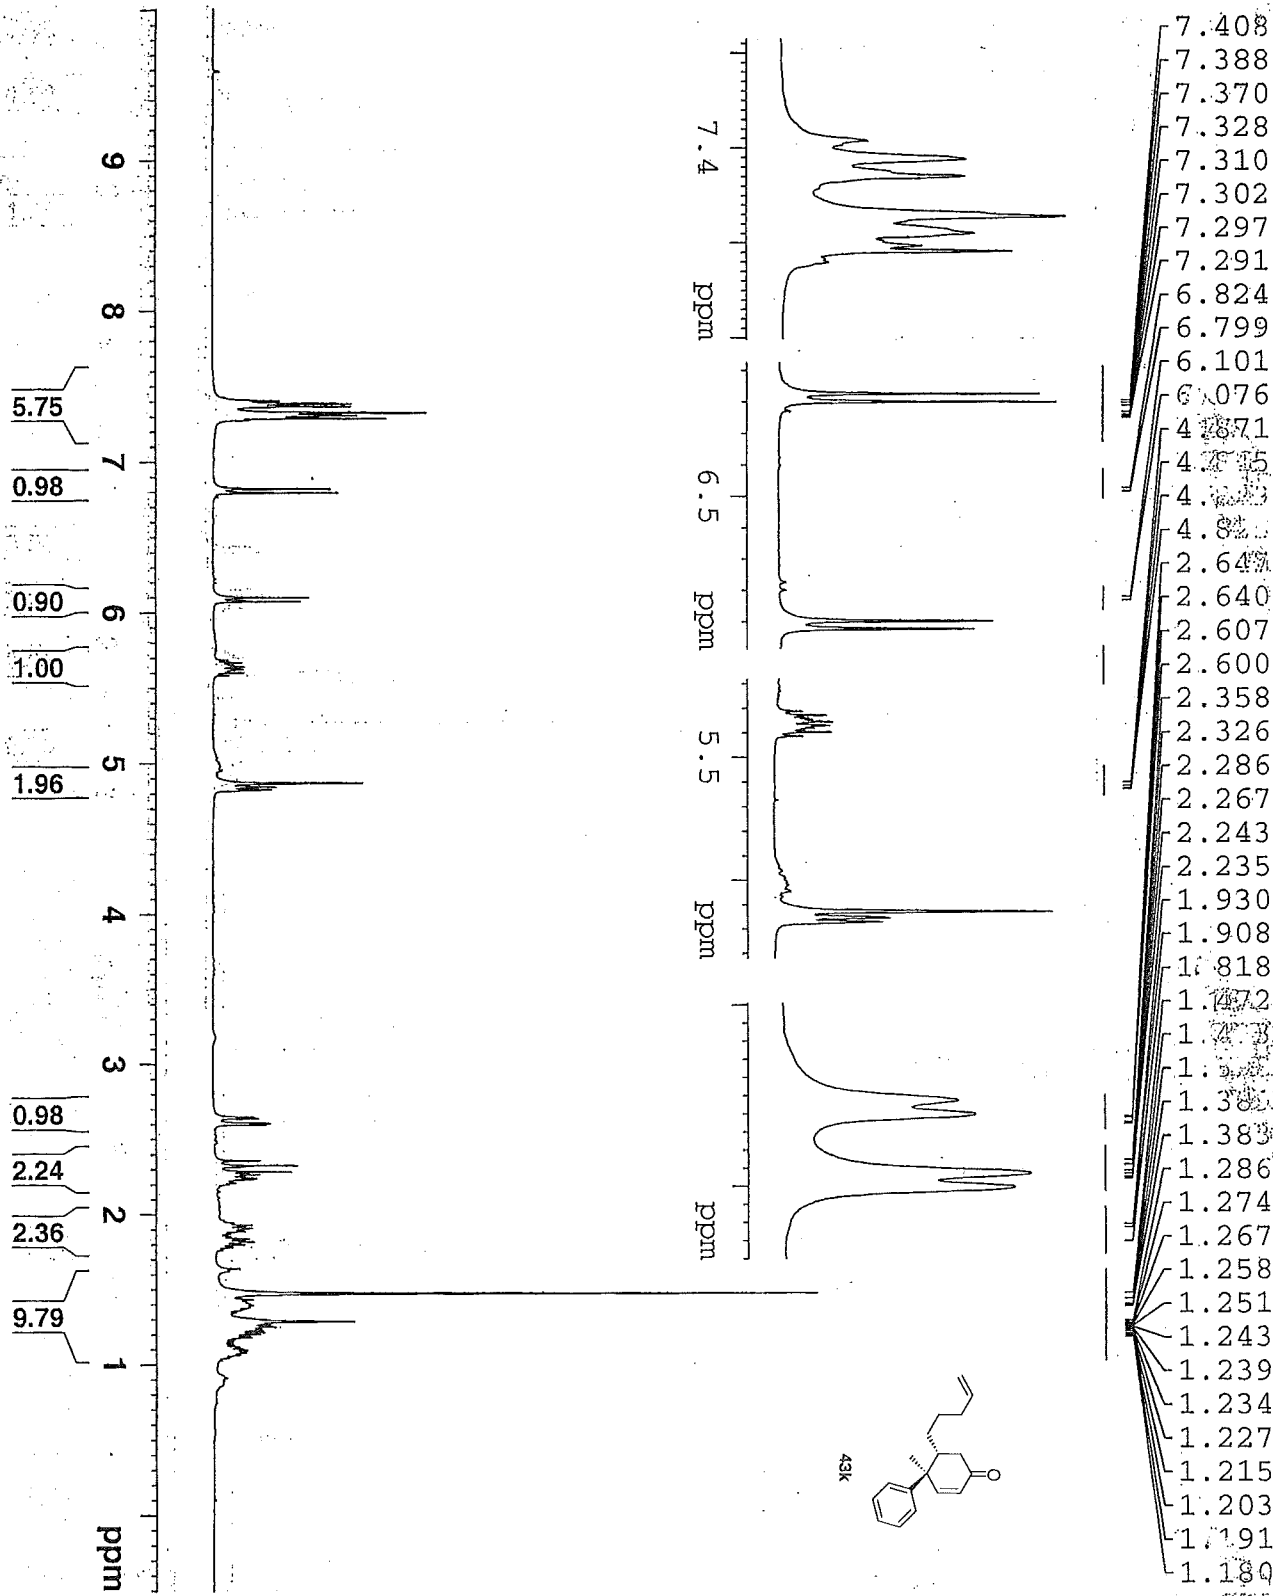

|                        |                |        |                |         |       |         |    |    |          |          |           |     |        |      |       |           |     |
|------------------------|----------------|--------|----------------|---------|-------|---------|----|----|----------|----------|-----------|-----|--------|------|-------|-----------|-----|
| NAMF                   | EXPNO          | PROCNO | PROBHD         | PULPROG | TD    | SOLVENT | NS | DS | SWH      | FIDRES   | AO        | RG  | DW     | DE   | TE    | D1        | TD0 |
| EXPNO                  | 20100310       | 1      | 5 mm PABBO BB- | zg30    | 32768 | CDCl3   | 32 | 2  | 6410.256 | 0.195625 | 2.5559540 | 128 | 78.000 | 6.50 | 298.6 | 2.0000000 | 1   |
| PROCNO                 | 1              | 1      |                |         |       |         |    |    |          |          |           |     |        |      |       |           |     |
| PROBHD                 | 5 mm PABBO BB- |        |                |         |       |         |    |    |          |          |           |     |        |      |       |           |     |
| PULPROG                | zg30           |        |                |         |       |         |    |    |          |          |           |     |        |      |       |           |     |
| TD                     | 32768          |        |                |         |       |         |    |    |          |          |           |     |        |      |       |           |     |
| SOLVENT                | CDCl3          |        |                |         |       |         |    |    |          |          |           |     |        |      |       |           |     |
| NS                     | 32             |        |                |         |       |         |    |    |          |          |           |     |        |      |       |           |     |
| DS                     | 2              |        |                |         |       |         |    |    |          |          |           |     |        |      |       |           |     |
| SWH                    | 6410.256       |        |                |         |       |         |    |    |          |          |           |     |        |      |       |           |     |
| FIDRES                 | 0.195625       |        |                |         |       |         |    |    |          |          |           |     |        |      |       |           |     |
| AO                     | 2.5559540      |        |                |         |       |         |    |    |          |          |           |     |        |      |       |           |     |
| RG                     | 128            |        |                |         |       |         |    |    |          |          |           |     |        |      |       |           |     |
| DW                     | 78.000         |        |                |         |       |         |    |    |          |          |           |     |        |      |       |           |     |
| DE                     | 6.50           |        |                |         |       |         |    |    |          |          |           |     |        |      |       |           |     |
| TE                     | 298.6          |        |                |         |       |         |    |    |          |          |           |     |        |      |       |           |     |
| D1                     | 2.0000000      |        |                |         |       |         |    |    |          |          |           |     |        |      |       |           |     |
| TD0                    | 1              |        |                |         |       |         |    |    |          |          |           |     |        |      |       |           |     |
| ===== CHANNEL f1 ===== |                |        |                |         |       |         |    |    |          |          |           |     |        |      |       |           |     |
| NUC1                   | 1H             |        |                |         |       |         |    |    |          |          |           |     |        |      |       |           |     |
| P1                     | 14.00          |        |                |         |       |         |    |    |          |          |           |     |        |      |       |           |     |
| PL1                    | 0.00           |        |                |         |       |         |    |    |          |          |           |     |        |      |       |           |     |
| PL1W                   | 10.27361584    |        |                |         |       |         |    |    |          |          |           |     |        |      |       |           |     |
| SFO1                   | 400.1378009    |        |                |         |       |         |    |    |          |          |           |     |        |      |       |           |     |
| SI                     | 32768          |        |                |         |       |         |    |    |          |          |           |     |        |      |       |           |     |
| SF                     | 400.1350000    |        |                |         |       |         |    |    |          |          |           |     |        |      |       |           |     |
| WDW                    | EM             |        |                |         |       |         |    |    |          |          |           |     |        |      |       |           |     |
| SSB                    | 0              |        |                |         |       |         |    |    |          |          |           |     |        |      |       |           |     |
| LB                     | 0.30           |        |                |         |       |         |    |    |          |          |           |     |        |      |       |           |     |
| GB                     | 0              |        |                |         |       |         |    |    |          |          |           |     |        |      |       |           |     |
| PC                     | 1.00           |        |                |         |       |         |    |    |          |          |           |     |        |      |       |           |     |

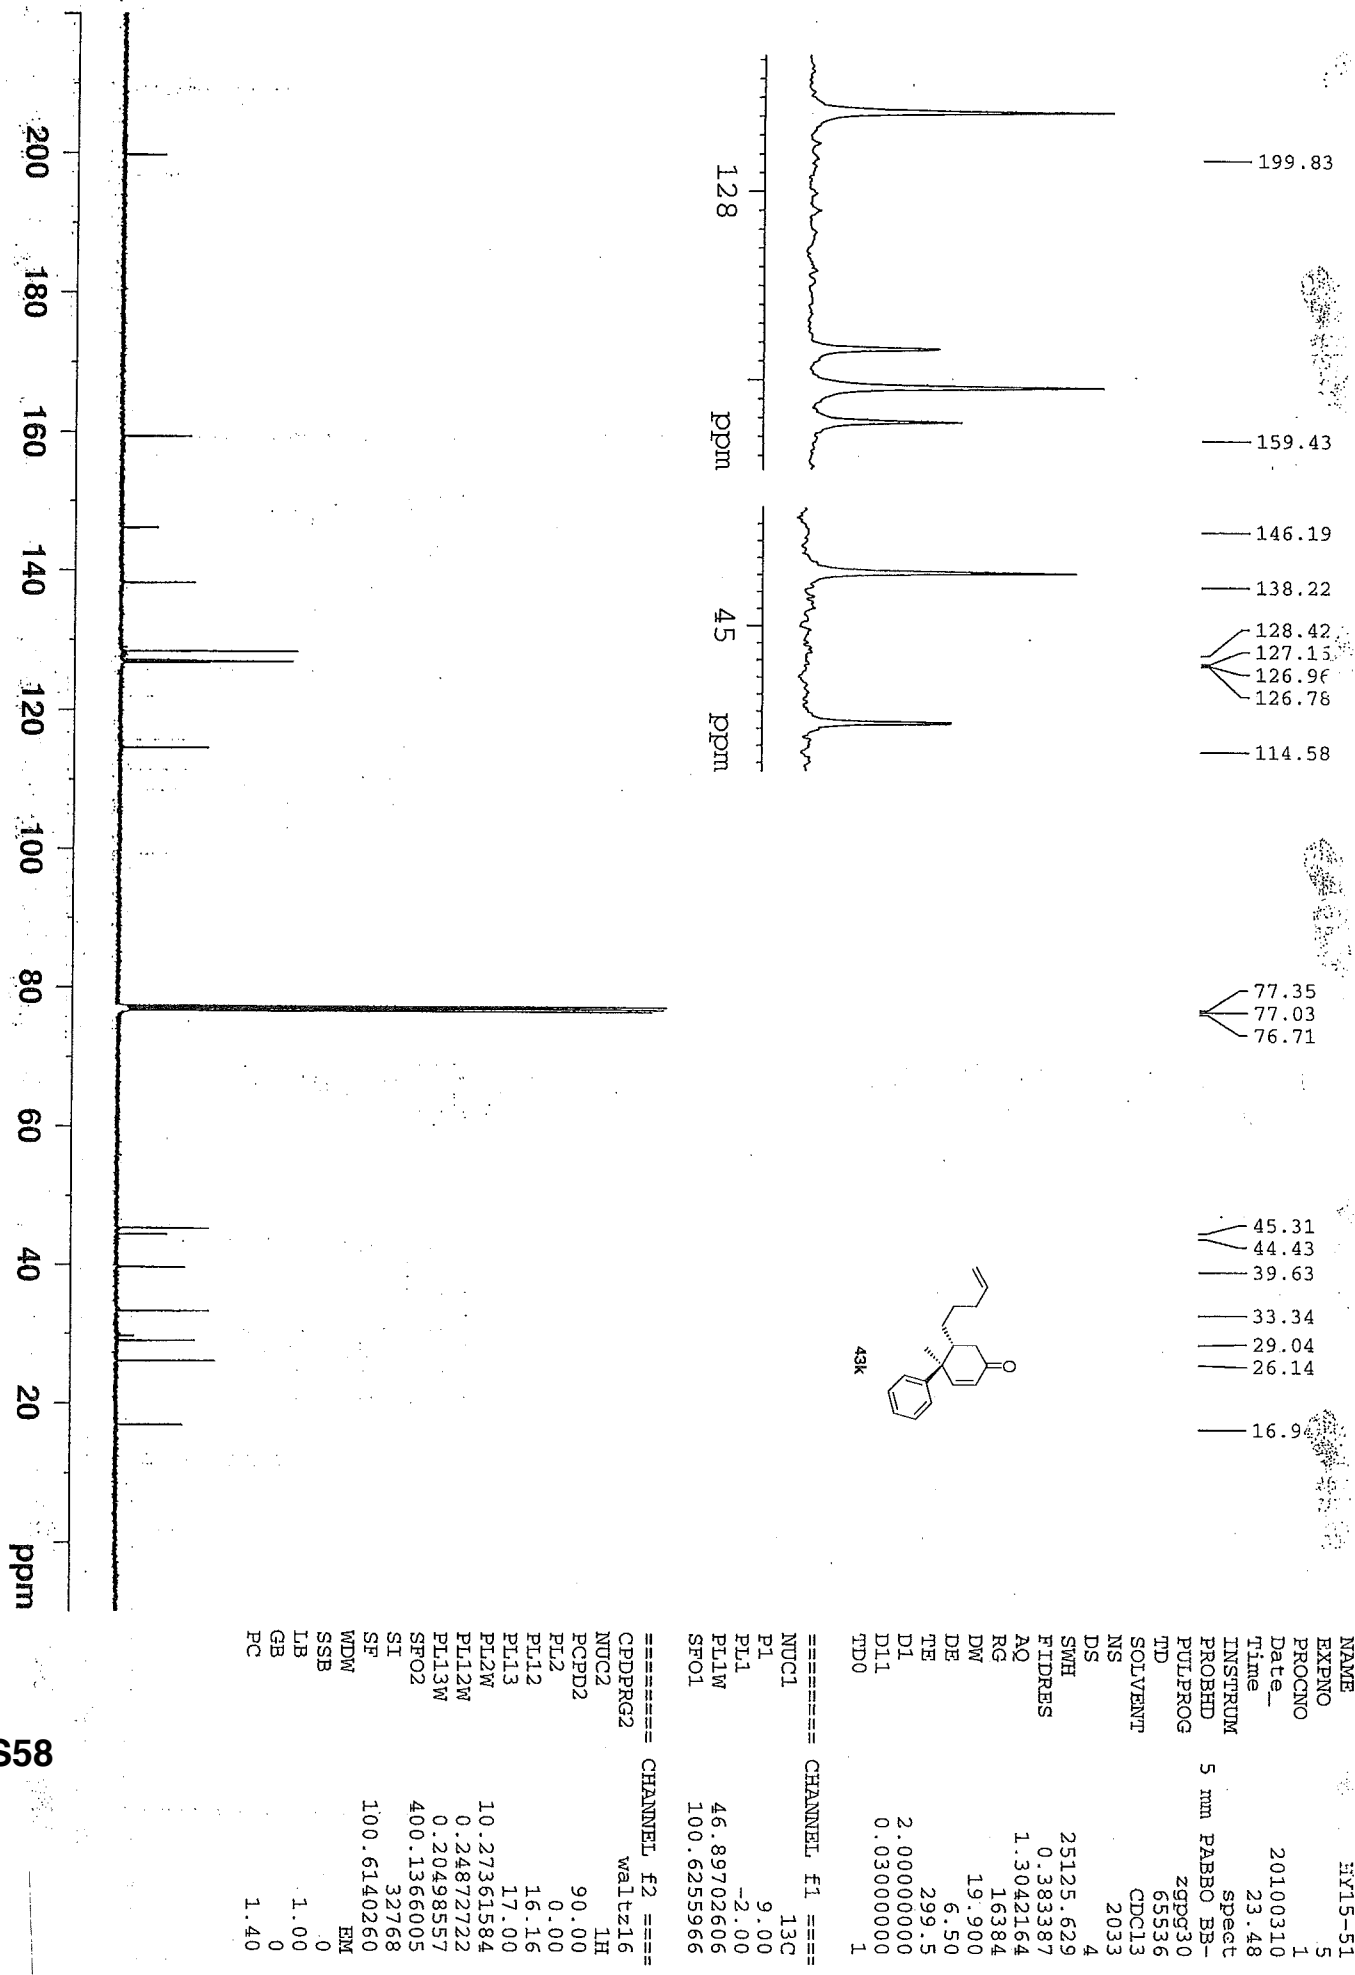

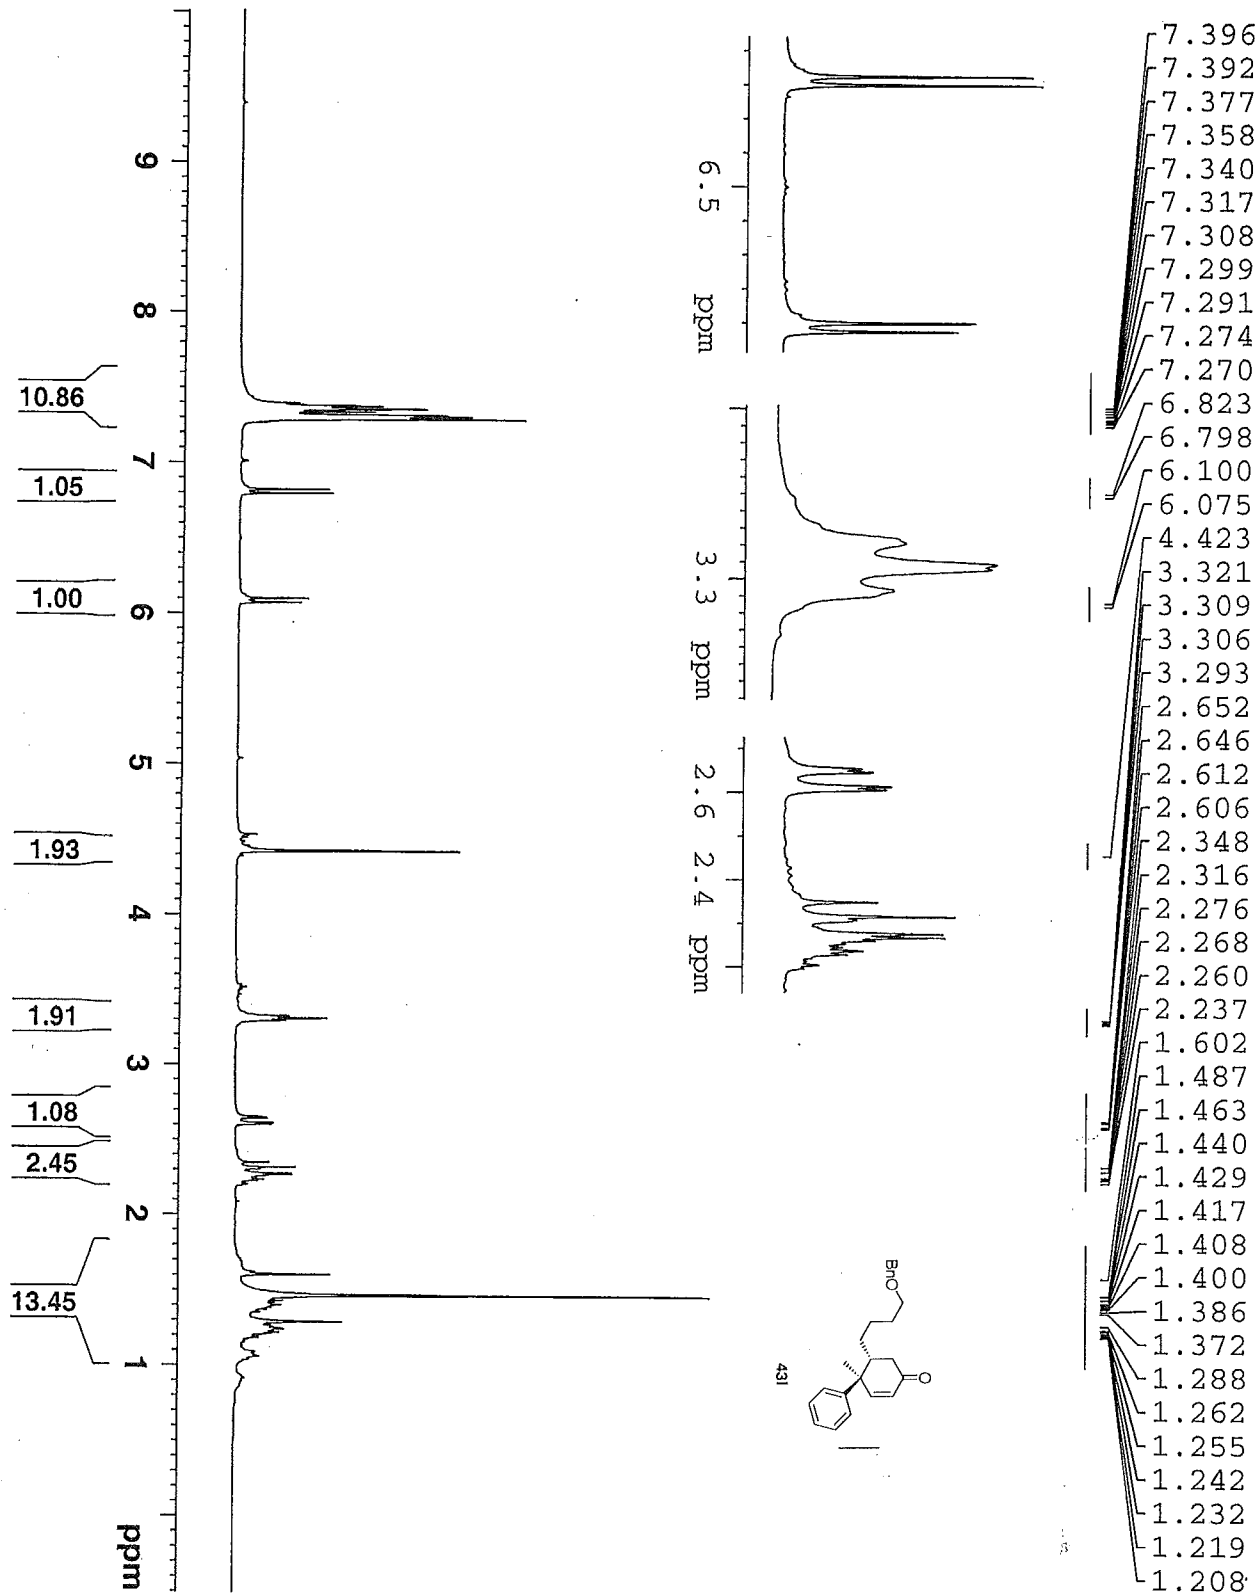

NAME HY15-48  
EXPNO 2  
PROCNO 1  
Date\_ 20100217  
Time 13.40  
INSTRUM spect  
PROBHD 5 mm PABBO BB-  
PULPROG zg30  
TD 32768  
SOLVENT CDCl3  
NS 32  
DS 2  
SWH 6410.256  
FIDRES 0.195625  
AQ 2.5559540  
RG 128  
DW 78.000  
DE 6.50  
TE 298.2  
D1 1.00000000  
TD0 1

==== CHANNEL f1 ====  
NUC1 1H  
P1 14.00  
PL1 0.00  
PL1W 10.27361584  
SF01 400.1378009  
SI 32768  
SF 400.1350000  
WDW EM  
SSB 0  
LB 0.30  
GB 0  
PC 1.00

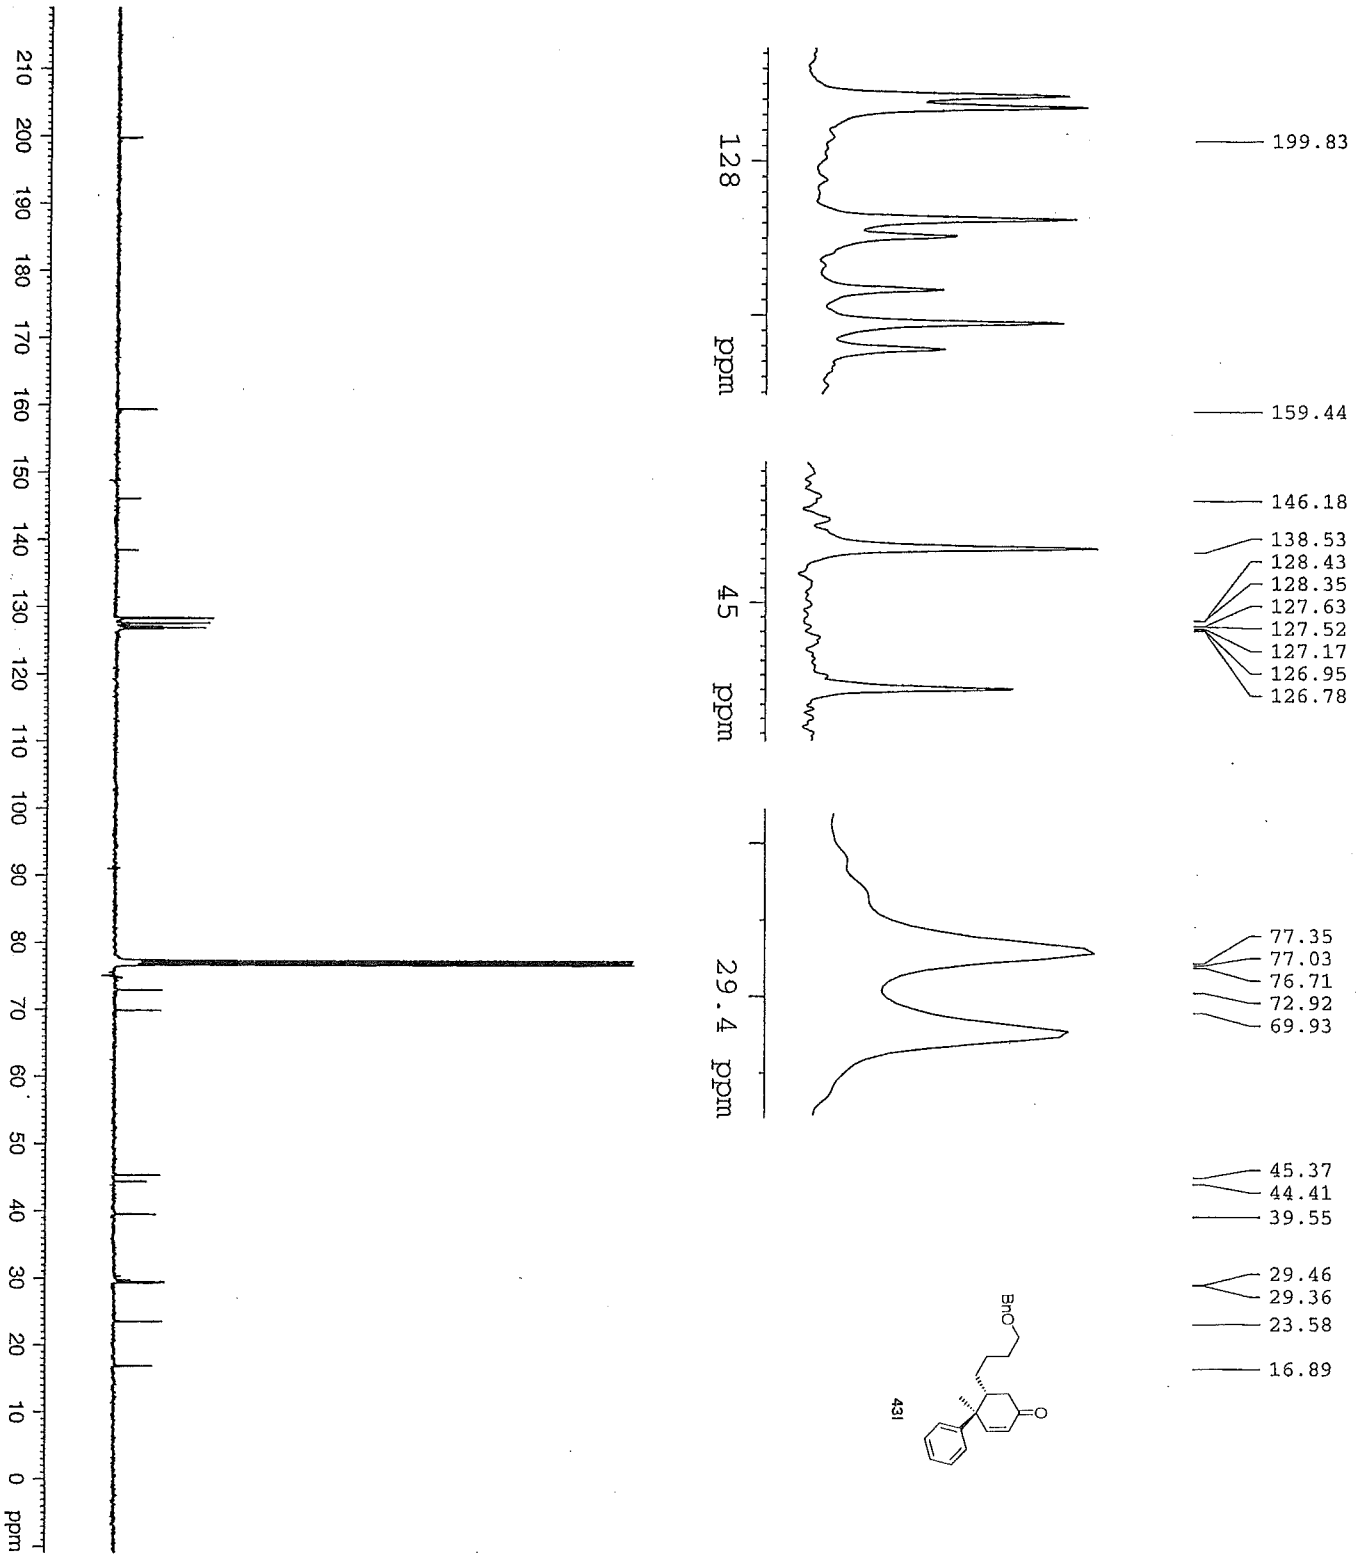

Current Data Parameters  
NAME HY15-48  
EXPNO 5  
PROCNO 1  
DU /m  
USDR Hua

F2 - Acquisition Parameters  
Date\_ 20100217  
Time 21.12  
INSTRUM DPX400  
PROBHD 5 mm BBO BB-1H  
PULPROG zgpg30  
TD 65536  
SOLVENT CDCl3  
NS 1700  
DS 4  
SWH 23980.814 Hz  
FIDRES 0.365918 Hz  
AQ 1.3664756 sec  
RG 5160.6  
DW 20.850 usec  
DE 6.00 usec  
TE 299.2 K  
d1 2.00000000 sec  
d11 0.03000000 sec  
DELTA 1.89999998 sec  
TD0 1

===== CHANNEL f1 =====  
NUC1 13C  
P1 8.30 usec  
PL1 -3.00 dB  
SFO1 100.6517495 MHz

===== CHANNEL f2 =====  
CPDPRG2 waltz16  
NUC2 1H  
PCPD2 90.00 usec  
PL2 -3.00 dB  
PL12 15.00 dB  
PL13 15.00 dB  
SFO2 400.2466010 MHz

F2 - Processing parameters  
SI 32768  
SF 100.6416850 MHz  
WDW EM  
SSB 0  
LB 3.00 Hz  
GB 0  
PC 1.40

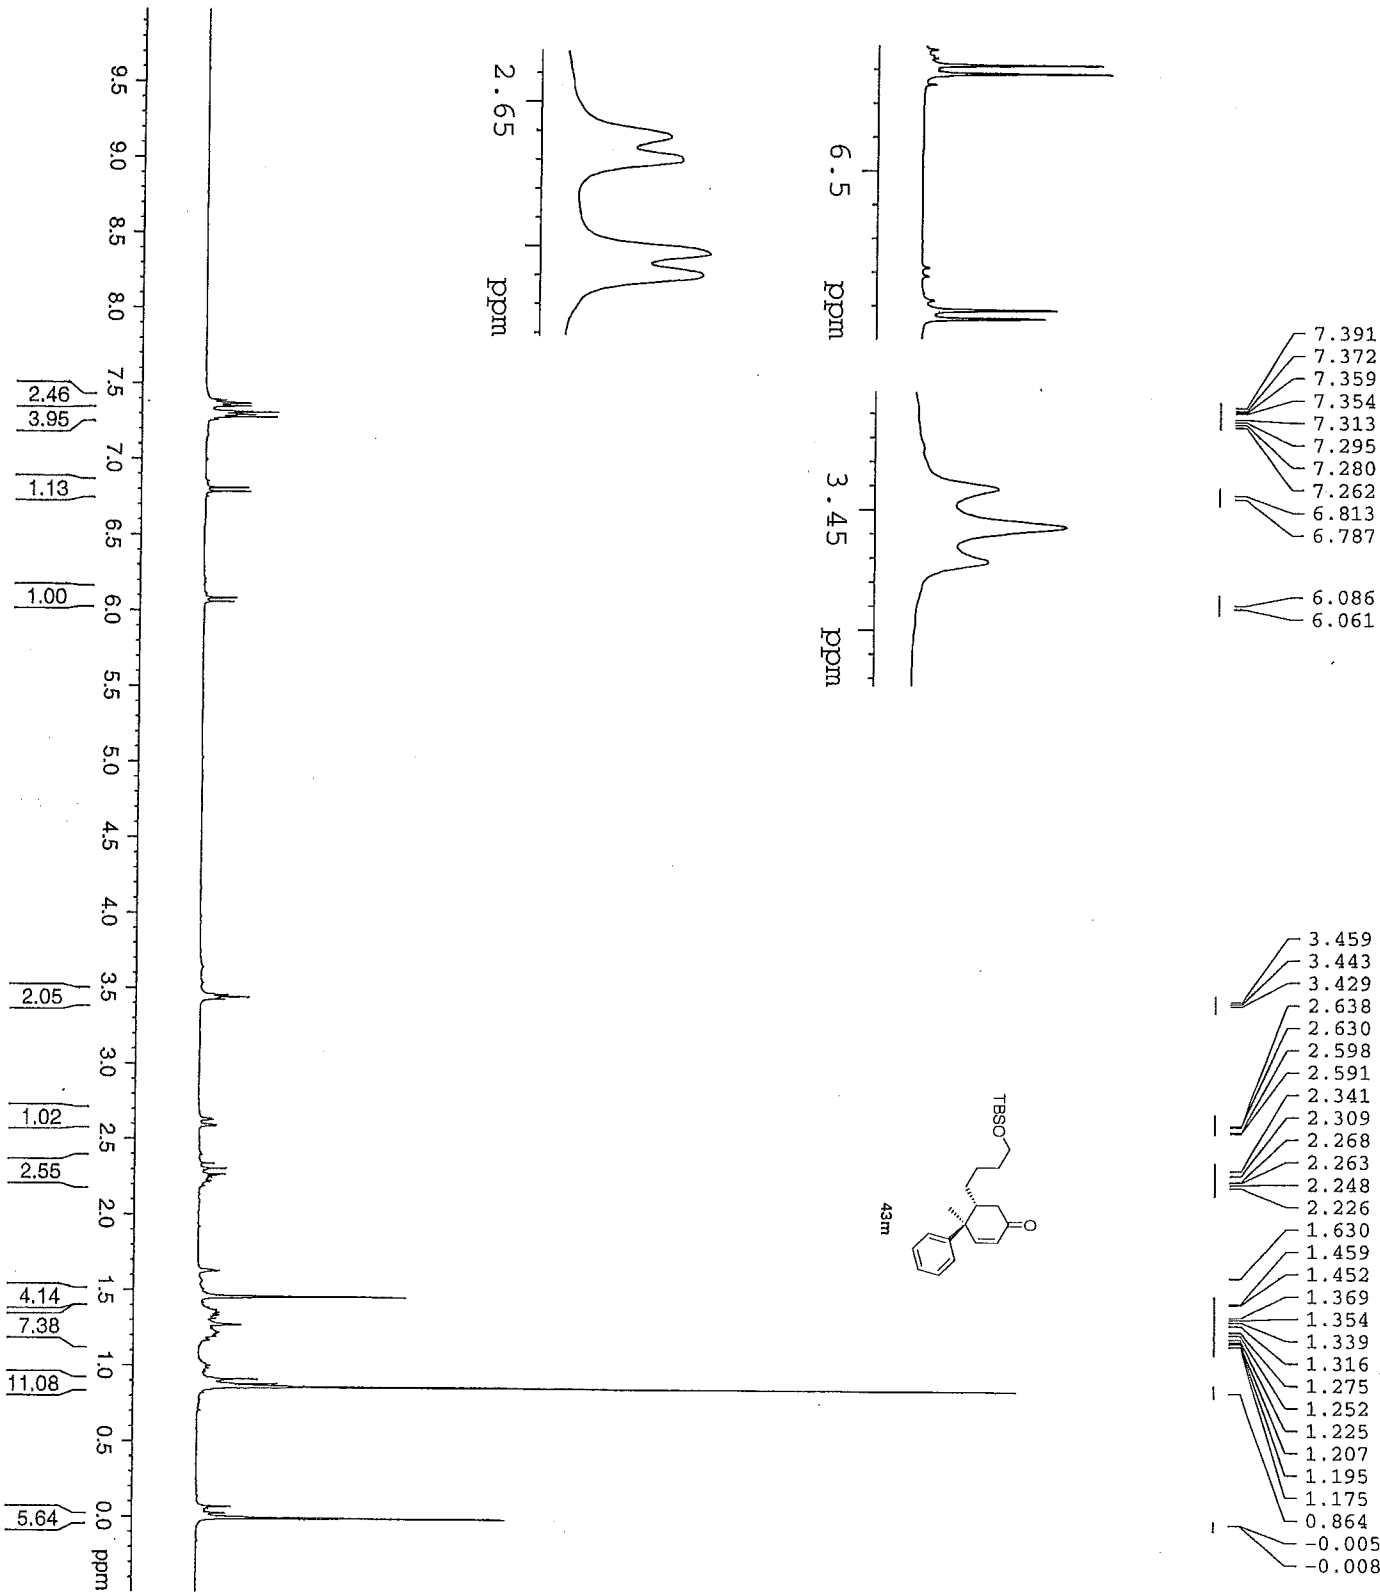

Current Data Parameters  
NAME H15-40  
EXPNO 1  
PROCNO 1  
DU /m  
USER HNA

F2 - Acquisition Parameters  
Date\_ 20100209  
Time 20.12  
INSTRUM DPX400  
PROBHD 5 mm BBO BB-1H  
PULPROG zg30  
TD 32768  
SOLVENT CDCl3  
NS 32  
DS 2  
SWH 6410.256 Hz  
FIDRES 0.195625 Hz  
AQ 2.559540 sec  
RG 181  
RW 78.000 usec  
DE 6.00 usec  
TE 299.2 K  
D1 1.00000000 sec  
TD0 1

==== CHANNEL f1 =====  
NUC1 1H  
P1 13.50 usec  
PL1 -3.00 dB  
SFO1 400.2478017 MHz

F2 - Processing parameters  
SI 32768  
SF 400.2450000 MHz  
WDW EM  
SSB 0  
LB 0.30 Hz  
GB 0  
PC 1.00

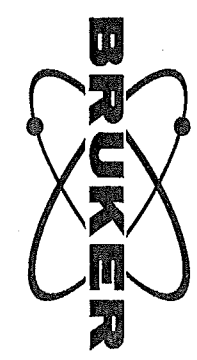

Current Data Parameters  
NAME HY15-40  
EXPNO 2  
PROCNO 1

F2 - Acquisition Parameters  
Date\_ 20100209  
Time 21.48  
INSTRUM DPX400  
PROBHD 5 mm BBO BB-1H  
PULPROG zgpg30  
TD 65536  
SOLVENT CDCl3  
NS 1668  
DS 4  
SWH 23980.814 Hz  
FIDRES 0.365918 Hz  
AQ 1.3664756 sec  
RG 4597.6  
DW 20.850 usec  
DE 6.00 usec  
TE 299.2 K  
D1 2.0000000 sec  
d11 0.0300000 sec  
DELTA 1.8999998 sec  
TD0 1

===== CHANNEL f1 =====  
NUC1 13C  
P1 8.30 usec  
PL1 -3.00 dB  
SFO1 100.6517495 MHz

===== CHANNEL f2 =====  
CPDPRG2 waltz16  
NUC2 1H  
PCPD2 90.00 usec  
PL2 -3.00 dB  
PL12 15.00 dB  
PL13 15.00 dB  
SFO2 400.2466010 MHz

F2 - Processing Parameters  
SI 32768  
SF 100.6416850 MHz  
WDW EM  
SSB 0  
LB 3.00 Hz  
GB 0  
PC 1.40

199.84  
159.49  
146.21  
128.42  
127.15  
126.94  
126.77  
77.35  
77.03  
76.71  
62.68  
45.45  
44.42  
39.56  
32.49  
29.36  
25.96  
23.15  
18.32  
16.92  
-5.32

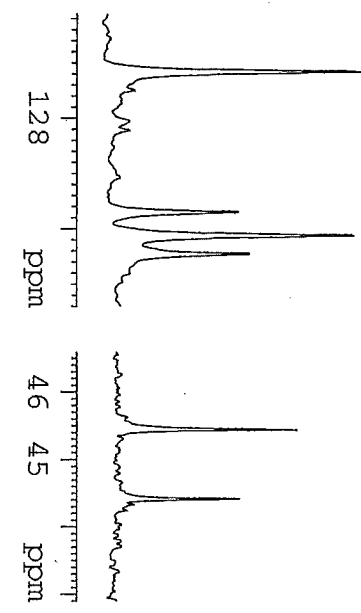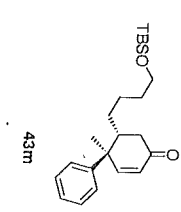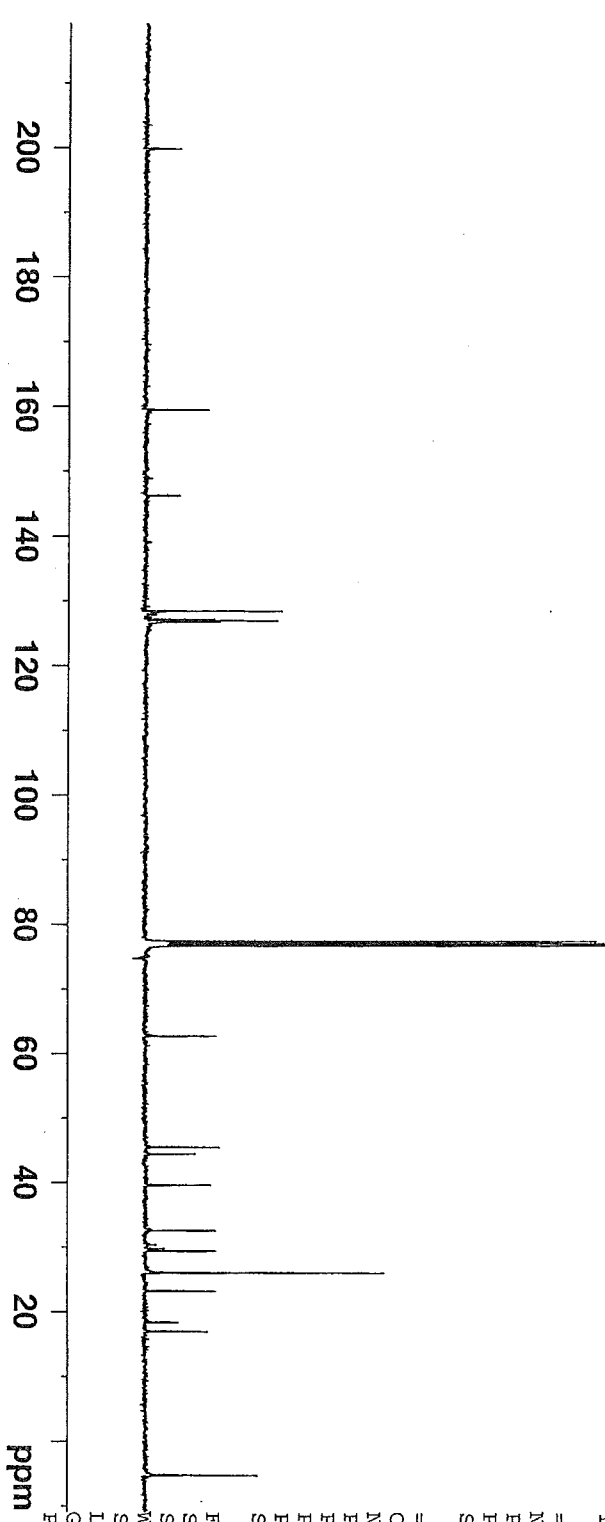

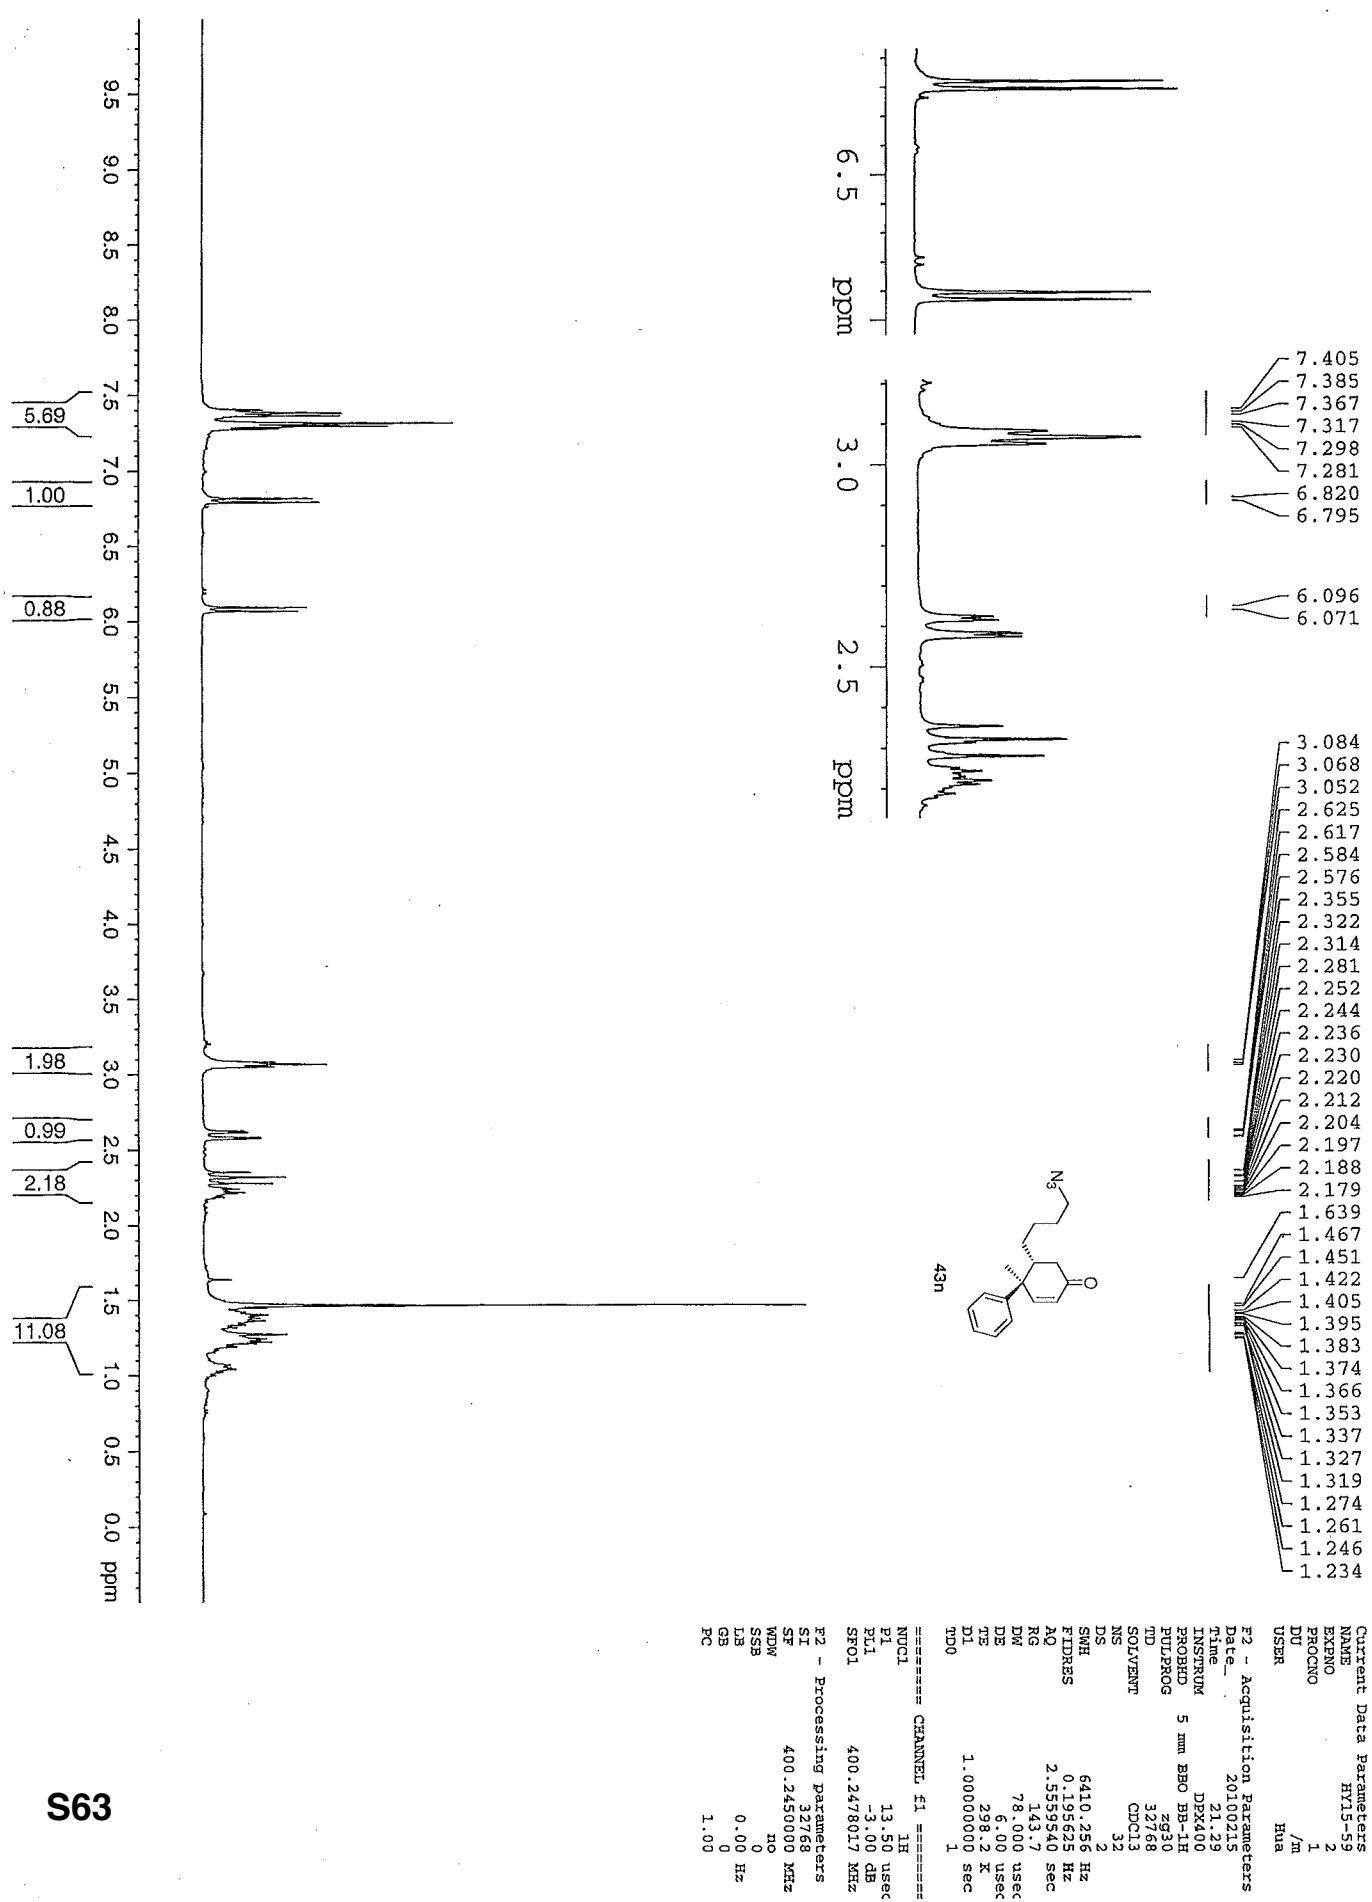

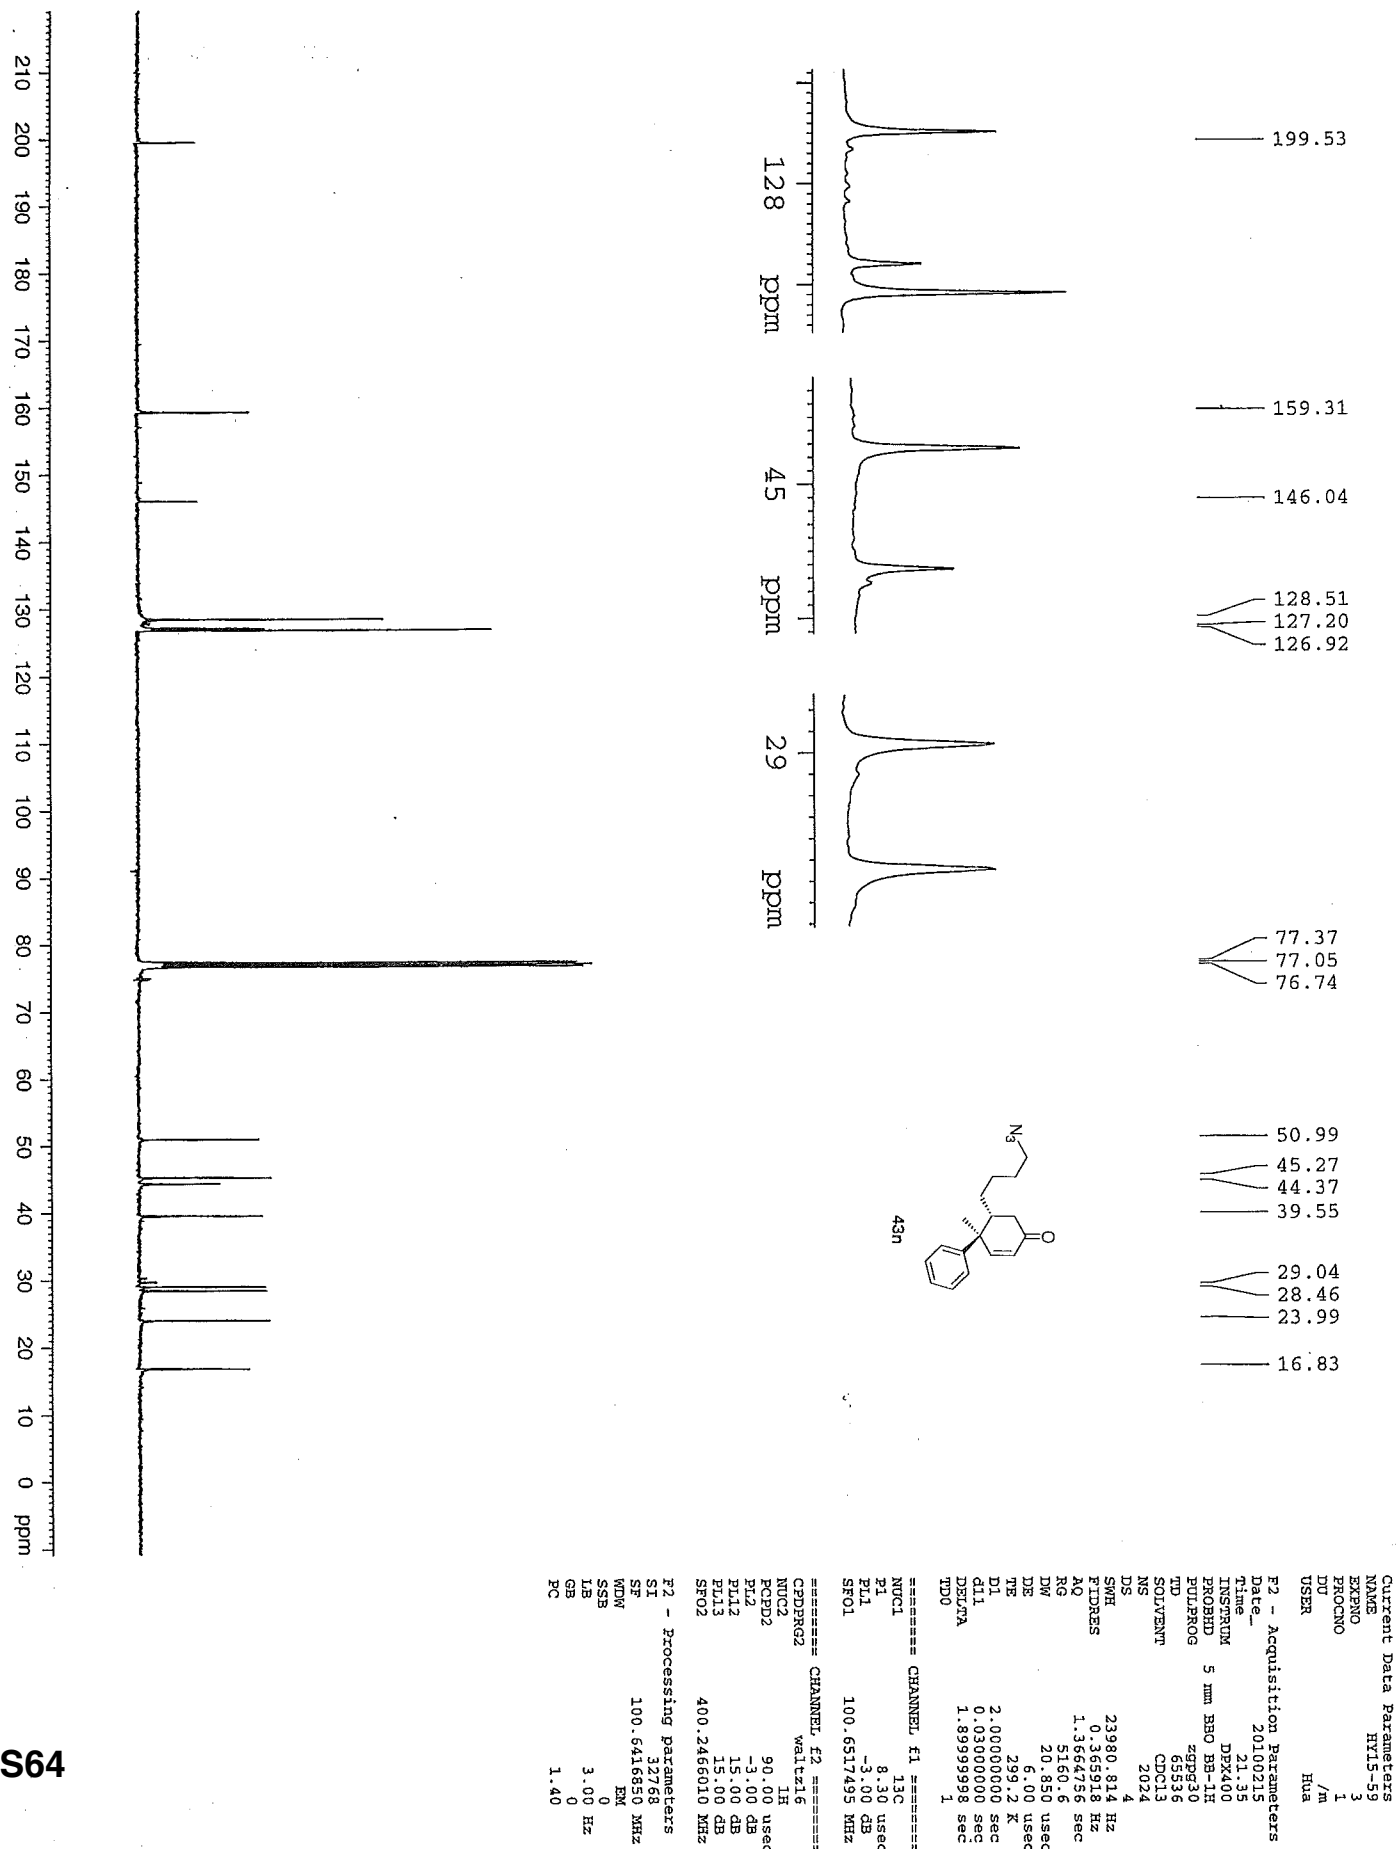



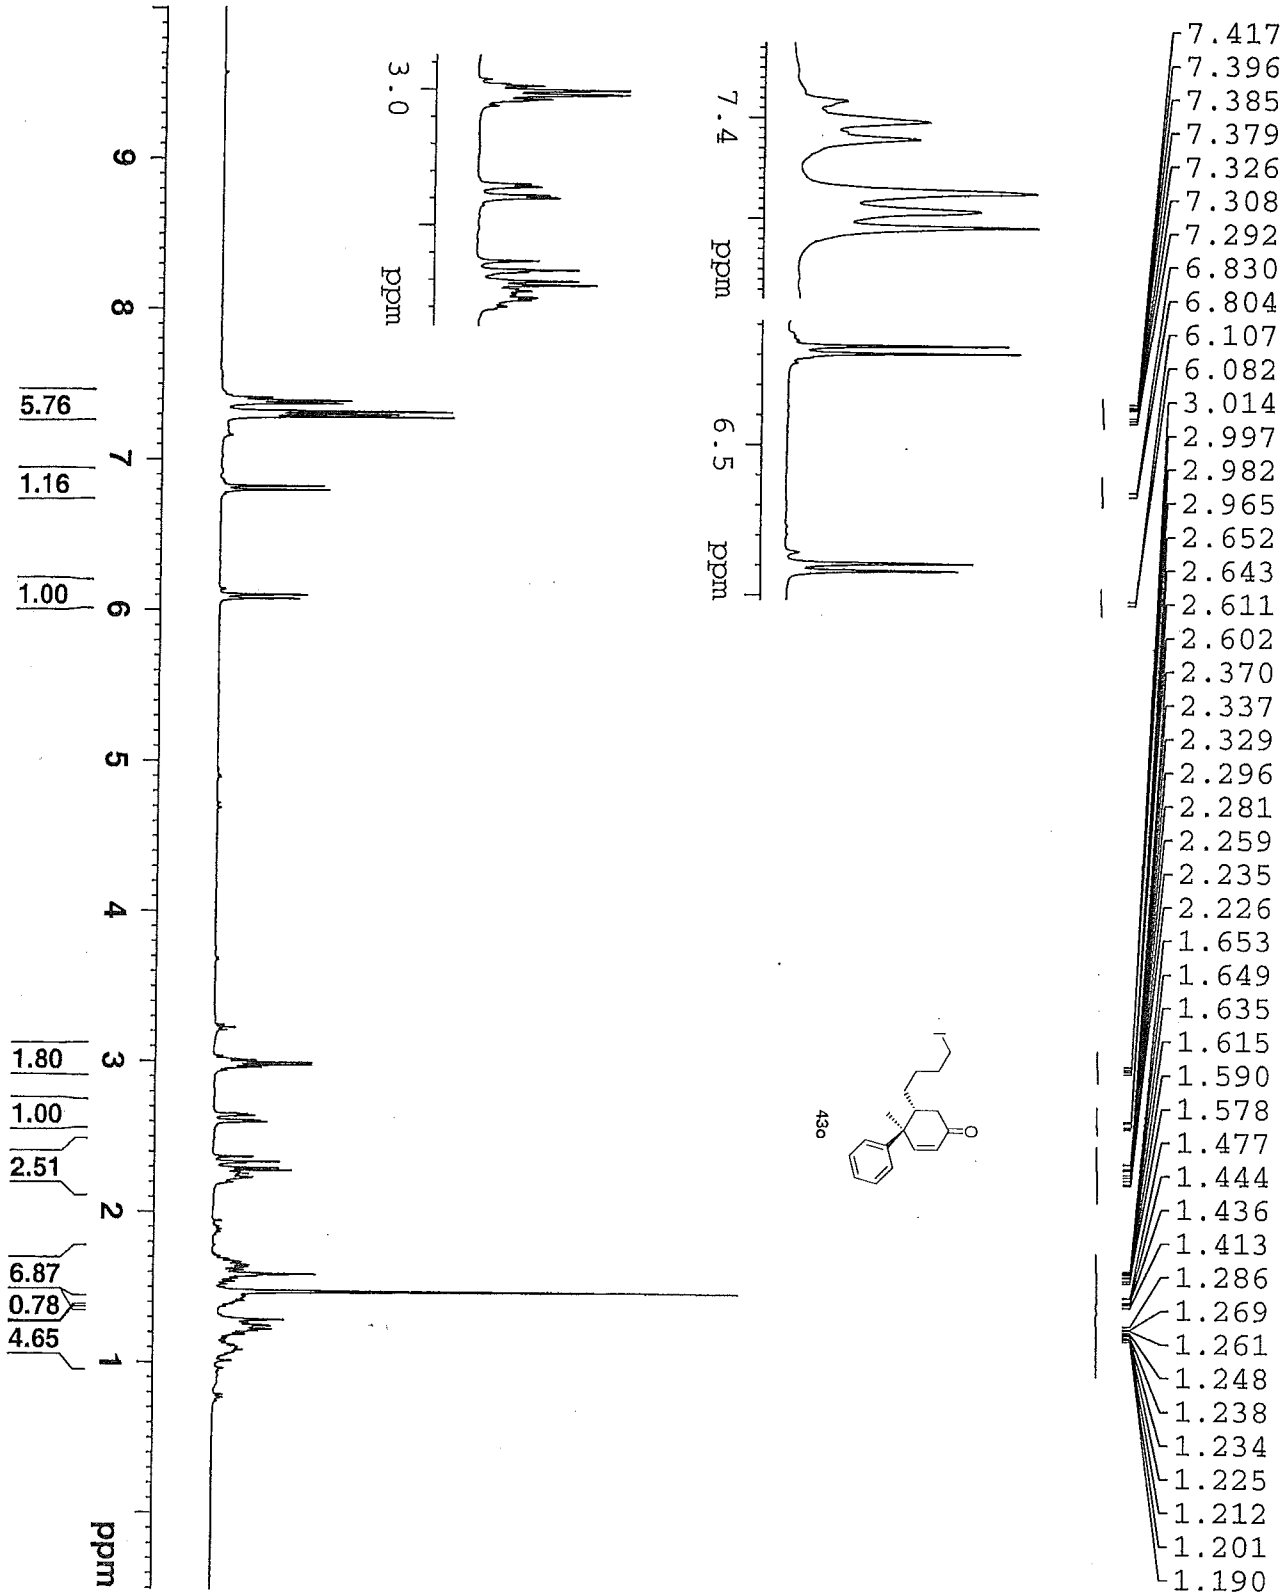

NAME HY15-9  
EXPNO 4  
PROCNO 1  
Date\_ 20100127  
Time 15.10  
INSTRUM spect  
PROBHD 5 mm PABBO BB-  
PULPROG zg30  
TD 32768  
SOLVENT CDCl3  
NS 32  
DS 2  
SWH 6410.256  
FIDRES 0.195625  
AQ 2.5559540  
RG 128  
DW 78.000  
DE 6.50  
TE 299.7  
D1 1.0000000  
TDO 1

===== CHANNEL f1 =====  
NUC1 1H  
P1 14.00  
PL1 0.00  
PL1W 10.27361584  
SF01 400.1378009  
SI 32768  
SF 400.1350000  
WDW EM  
SSB 0  
LB 0.30  
GB 0  
PC 1.00

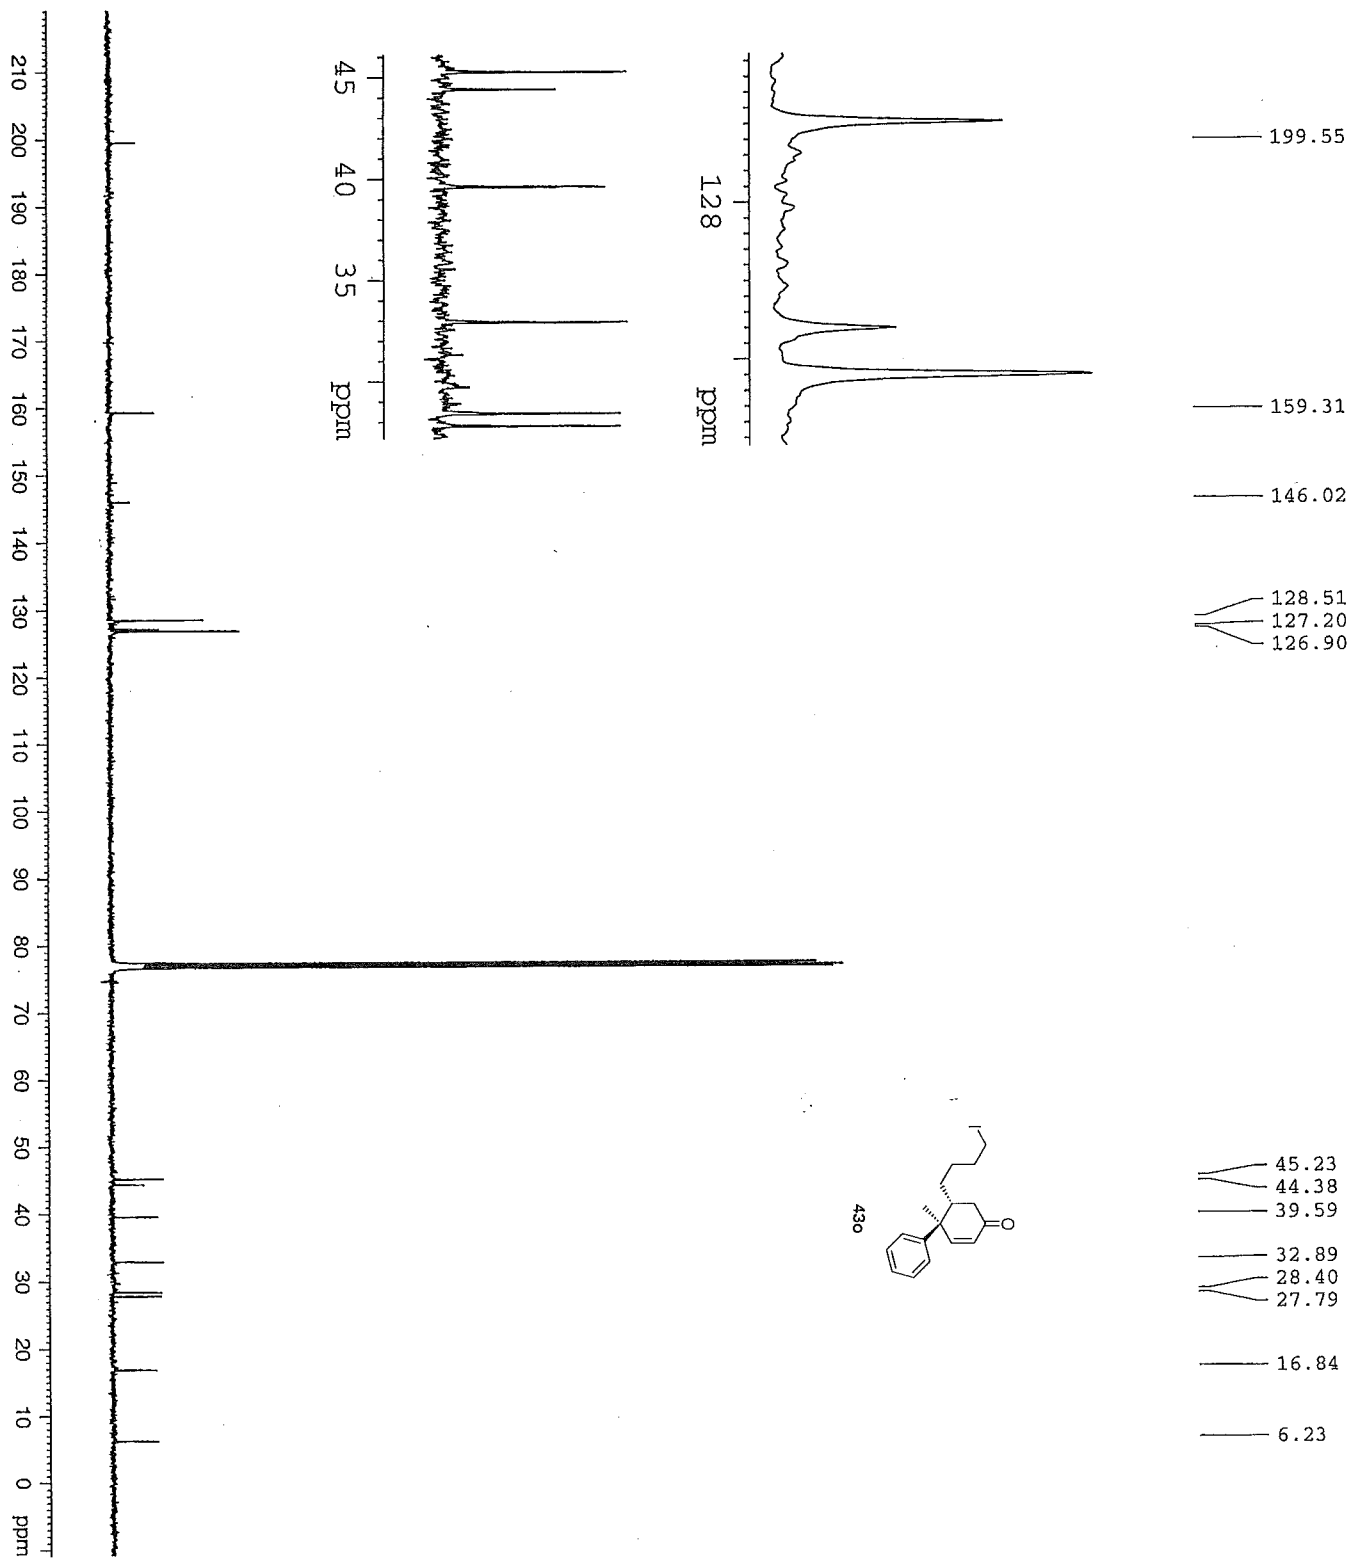

Current Data Parameters  
NAME HYL5-9  
EXPNO 5  
PROCNO 1  
DT 1/m  
USER Hwa

F2 - Acquisition Parameters  
Date\_ 20100127  
Time 16.01  
INSTRUM DFX400  
PROBHD 5 mm BBO BB-1H  
PULPROG zgpg30  
TD 65536  
FIDRES 0.03000000 sec  
DELTA 1.89999998 sec  
TD0 1

===== CHANNEL f1 =====  
NUC1 13C  
P1 8.30 usec  
PL1 -3.00 dB  
SFO1 100.6517495 MHz

===== CHANNEL f2 =====  
CPDPRG2 waltz16  
NUC2 1H  
PCPD2 90.00 usec  
PL2 -3.00 dB  
PL12 15.00 dB  
PL13 15.00 dB  
SFO2 400.2466010 MHz

F2 - Processing parameters  
SI 32768  
SF 100.6416850 MHz  
WDW EM  
SSB 0  
LB 3.00 Hz  
GB 0  
PC 1.40

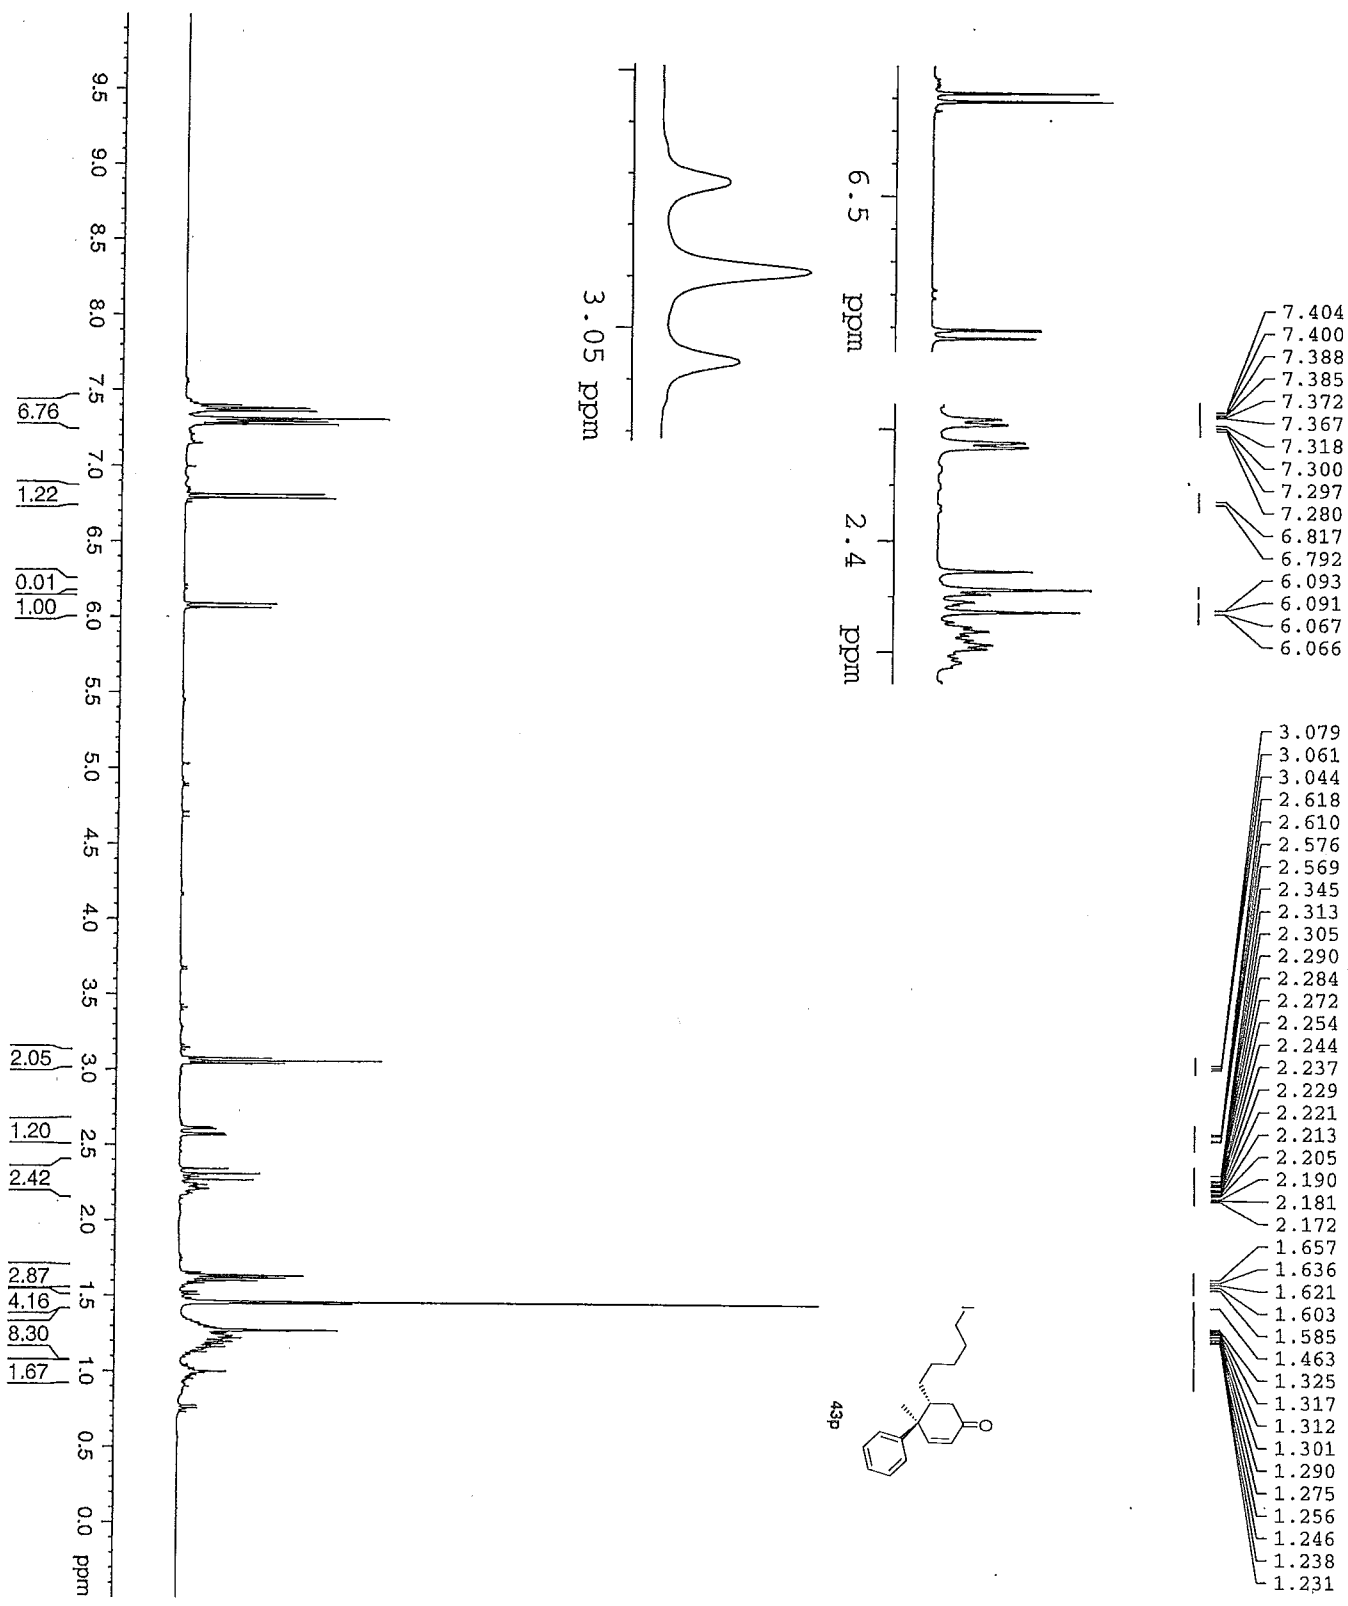

Current Data Parameters  
NAME: HX15-22  
EXPNO: 2  
PROCNO: 1  
DU: /m  
USER: Hua

F2 - Acquisition Parameters  
Date\_: 20100114  
Time: 12.50  
INSTRUM: DPX400  
PROBHD: 5 mm BBO BB-1H  
PULPROG: zg30  
TD: 32768  
SOLVENT: CDCl3  
NS: 32  
DS: 2  
SWH: 6410.256 Hz  
FIDRES: 0.195625 Hz  
AQ: 2.3539540 sec  
RG: 181  
DW: 78.000 usec  
DE: 6.00 usec  
TE: 299.2 K  
D1: 1.00000000 sec  
TD0: 1

==== CHANNEL f1 =====  
NUC1: 1H  
P1: 13.50 usec  
PL: -3.00 dB  
SFO1: 400.2478017 MHz

F2 - Processing parameters  
SI: 32768  
SF: 400.2450000 MHz  
WDW: EM  
SSB: 0  
LB: 0.30 Hz  
GB: 0  
PC: 1.00

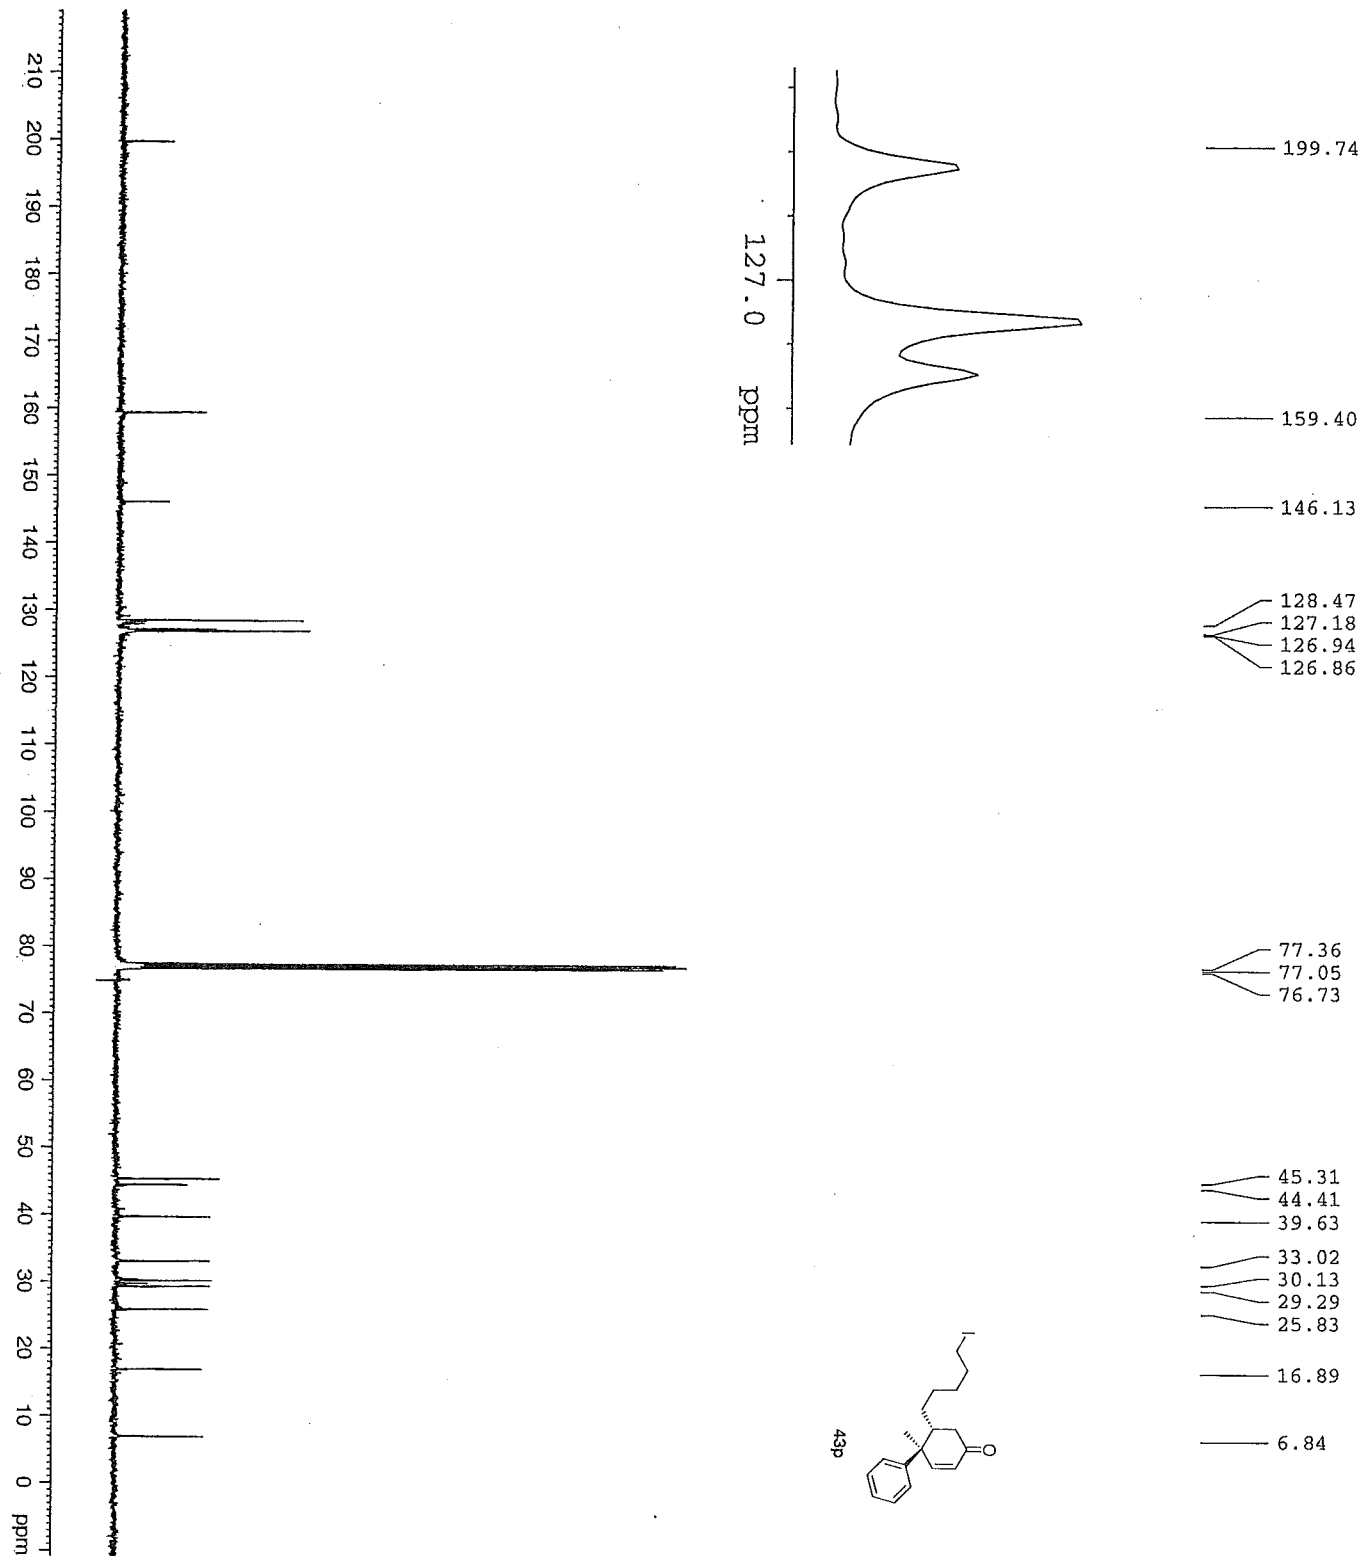

Current Data Parameters  
NAME HY15-22  
EXPNO 4  
PROCNO 1  
DU /m  
USER Hua

F2 - Acquisition Parameters  
Date\_ 20100114  
Time 13.30  
INSTRUM DPX400  
PROBHD 5 mm BBO BB-1H  
PULPROG zgpg30  
TD 65536  
SOLVENT CDCl3  
NS 556  
DS 4  
SWH 23980.814 Hz  
FIDRES 0.365918 Hz  
AQ 1.3664756 sec  
RG 10321.3  
DW 20.850 usec  
DE 6.00 usec  
TE 329.2 K  
D1 2.0000000 sec  
d11 0.0300000 sec  
DELTA 1.8999999 sec  
TD0 1

===== CHANNEL f1 =====  
NUC1 13C  
P1 8.30 usec  
PL1 -3.00 dB  
SF01 100.6517495 MHz

===== CHANNEL f2 =====  
CPDPRG2 waltz16  
NUC2 1H  
PCPD2 90.00 usec  
PL2 -3.00 dB  
PL12 15.00 dB  
PL13 15.00 dB  
SFO2 400.2466010 MHz

F2 - Processing parameters  
SI 32768  
SF 100.6416850 MHz  
WDW EM  
SSB 0  
LB 3.00 Hz  
GB 0  
PC 1.40

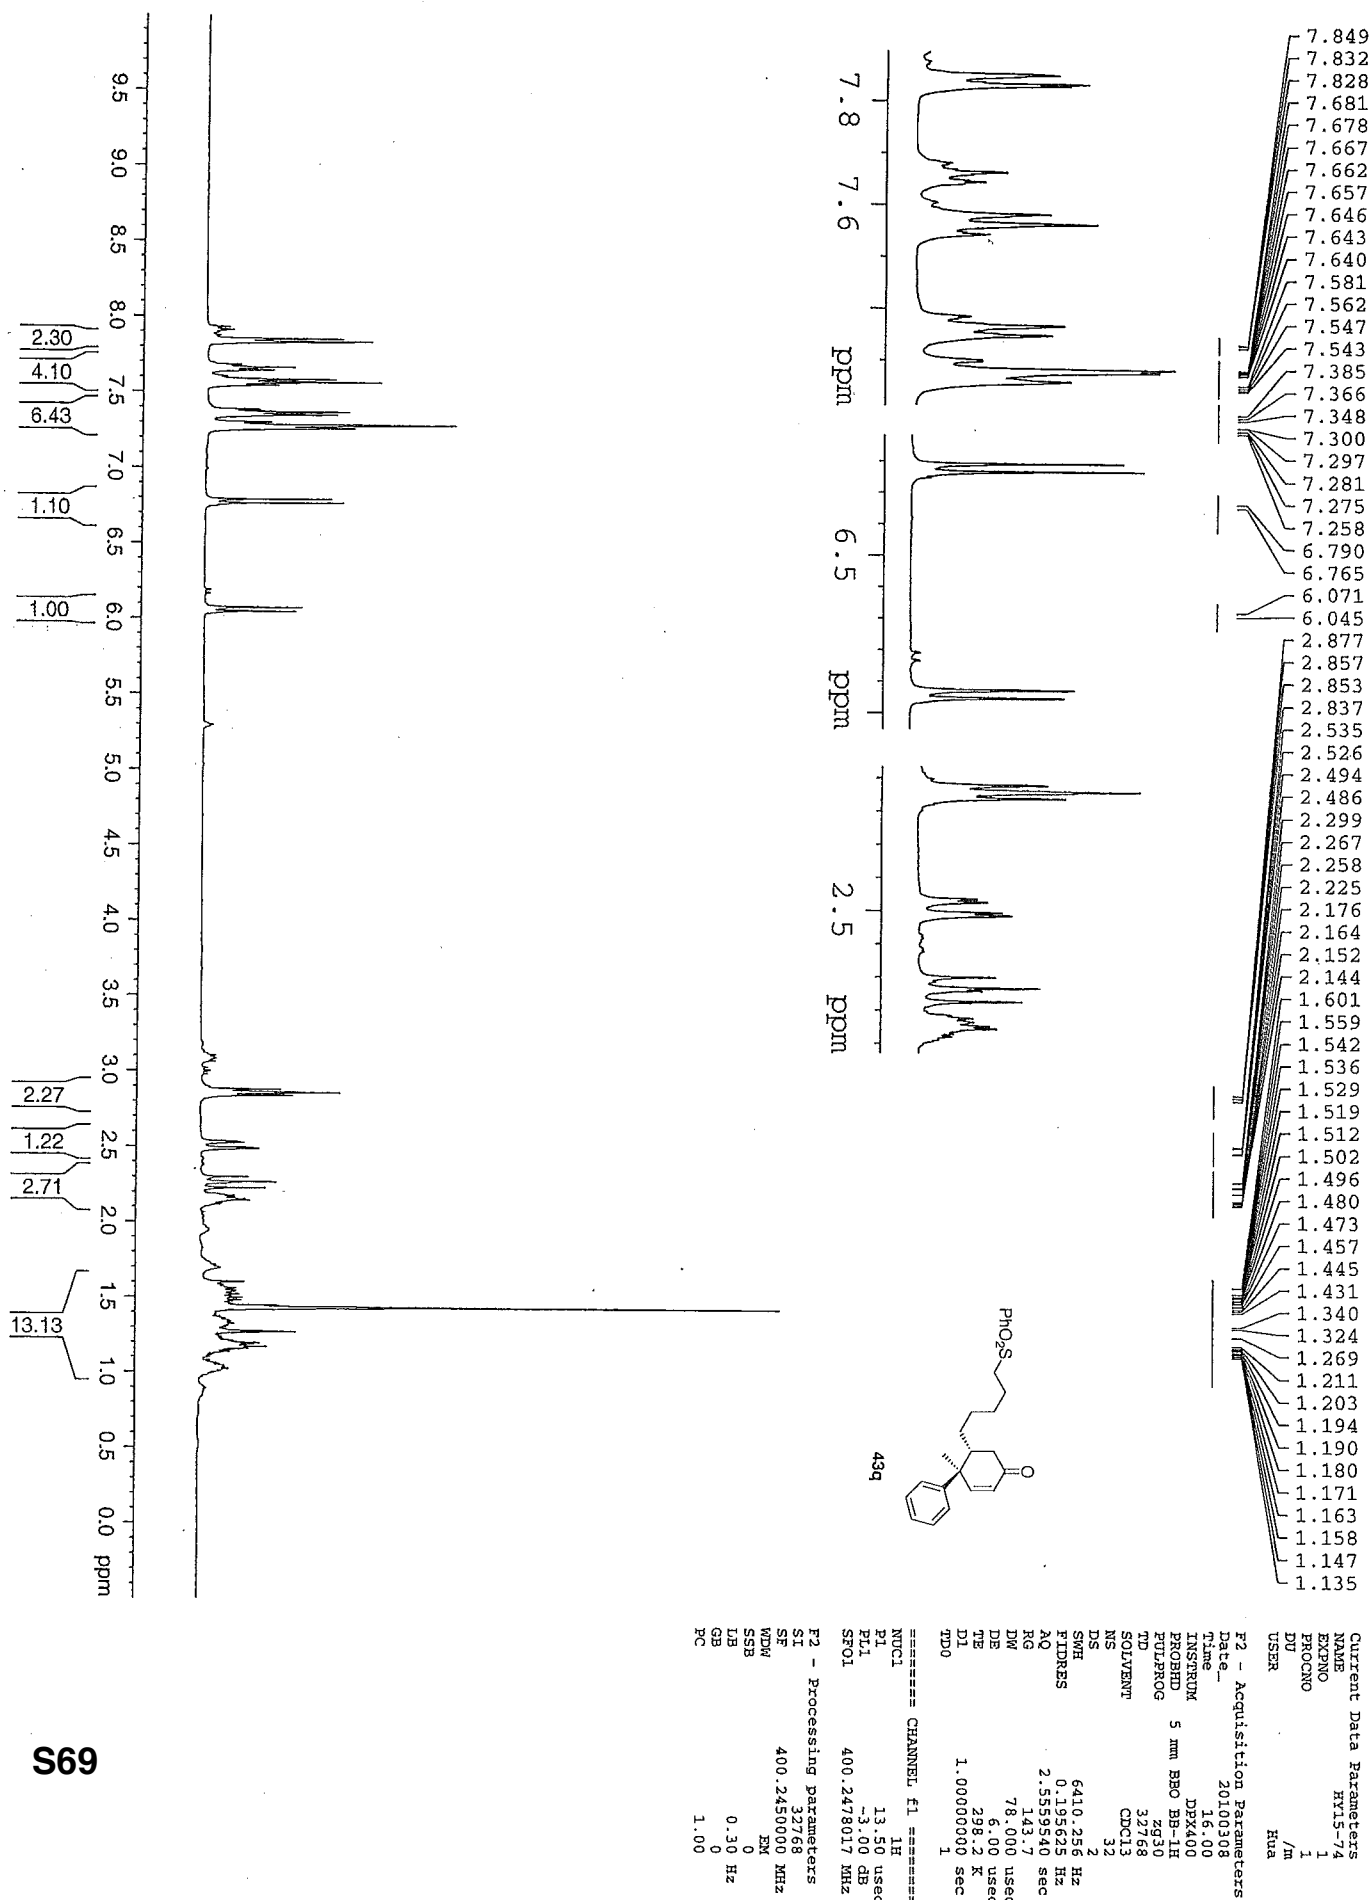

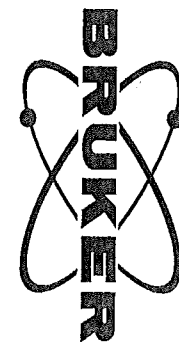

Current Data Parameters  
NAME HYL5-74  
EXPNO 2  
PROCNO 1

F2 - Acquisition Parameters

Date\_ 20100308  
Time 17.58  
INSTRUM DPX400  
PROBHD 5 mm BBO BB-1H  
PULPROG zgpg30  
TD 65536  
SOLVENT CDCl3  
NS 2024  
DS 4  
SWH 23980.814 Hz  
FIDRES 0.365918 Hz  
AQ 1.3664756 sec  
RG 9195.2  
DW 20.850 usec  
DE 6.00 usec  
TE 299.2 K  
d1 2.0000000 sec  
d11 0.0300000 sec  
DELTA 1.8999998 sec  
TD0 1

===== CHANNEL f1 =====  
NUC1 13C  
P1 8.30 usec  
PL1 -3.00 dB  
SFO1 100.6517495 MHz

===== CHANNEL f2 =====  
CPDPRG2 waltz16  
NUC2 1H  
PCPD2 90.00 usec  
PL2 -3.00 dB  
PL12 15.00 dB  
PL13 15.00 dB  
SFO2 400.2466010 MHz

F2 - Processing Parameters  
SI 32768  
SF 100.6416850 MHz  
WDW no  
SSB 0  
LB 0.00 Hz  
GB 0  
PC 1.40

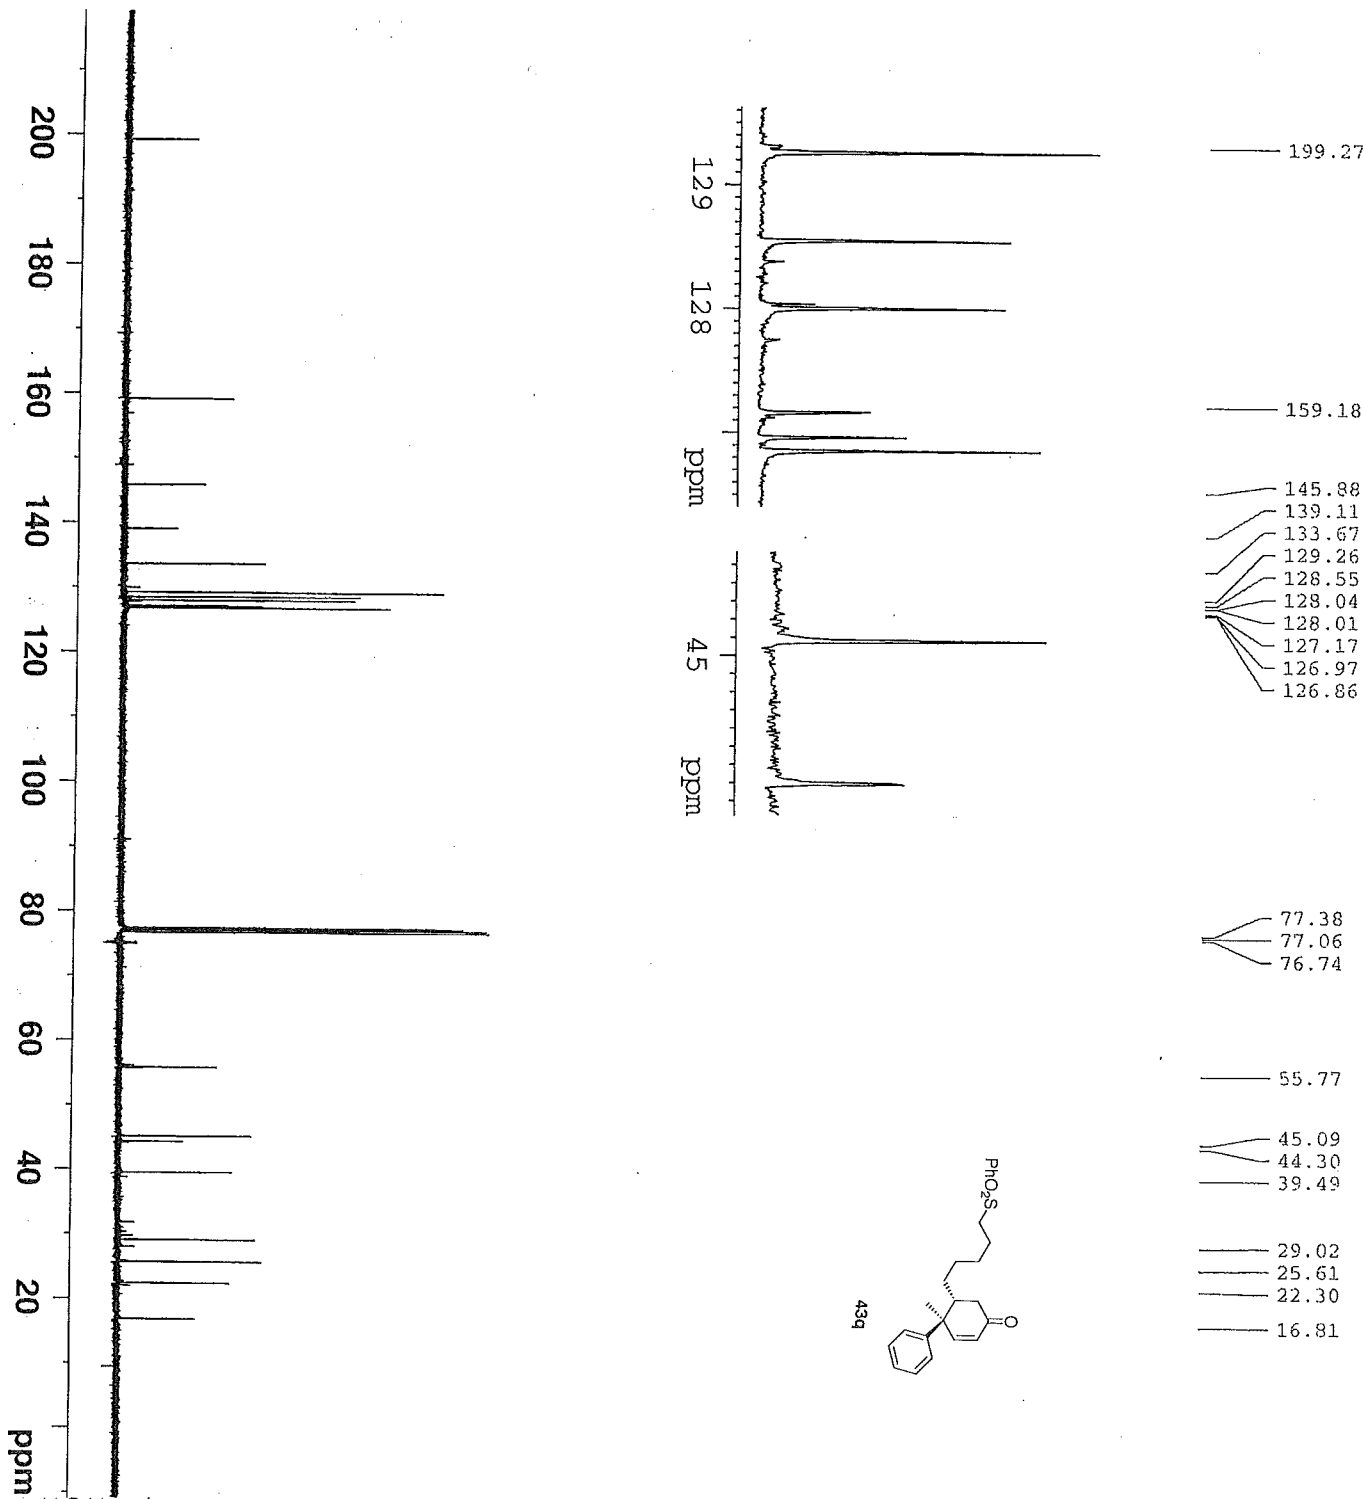

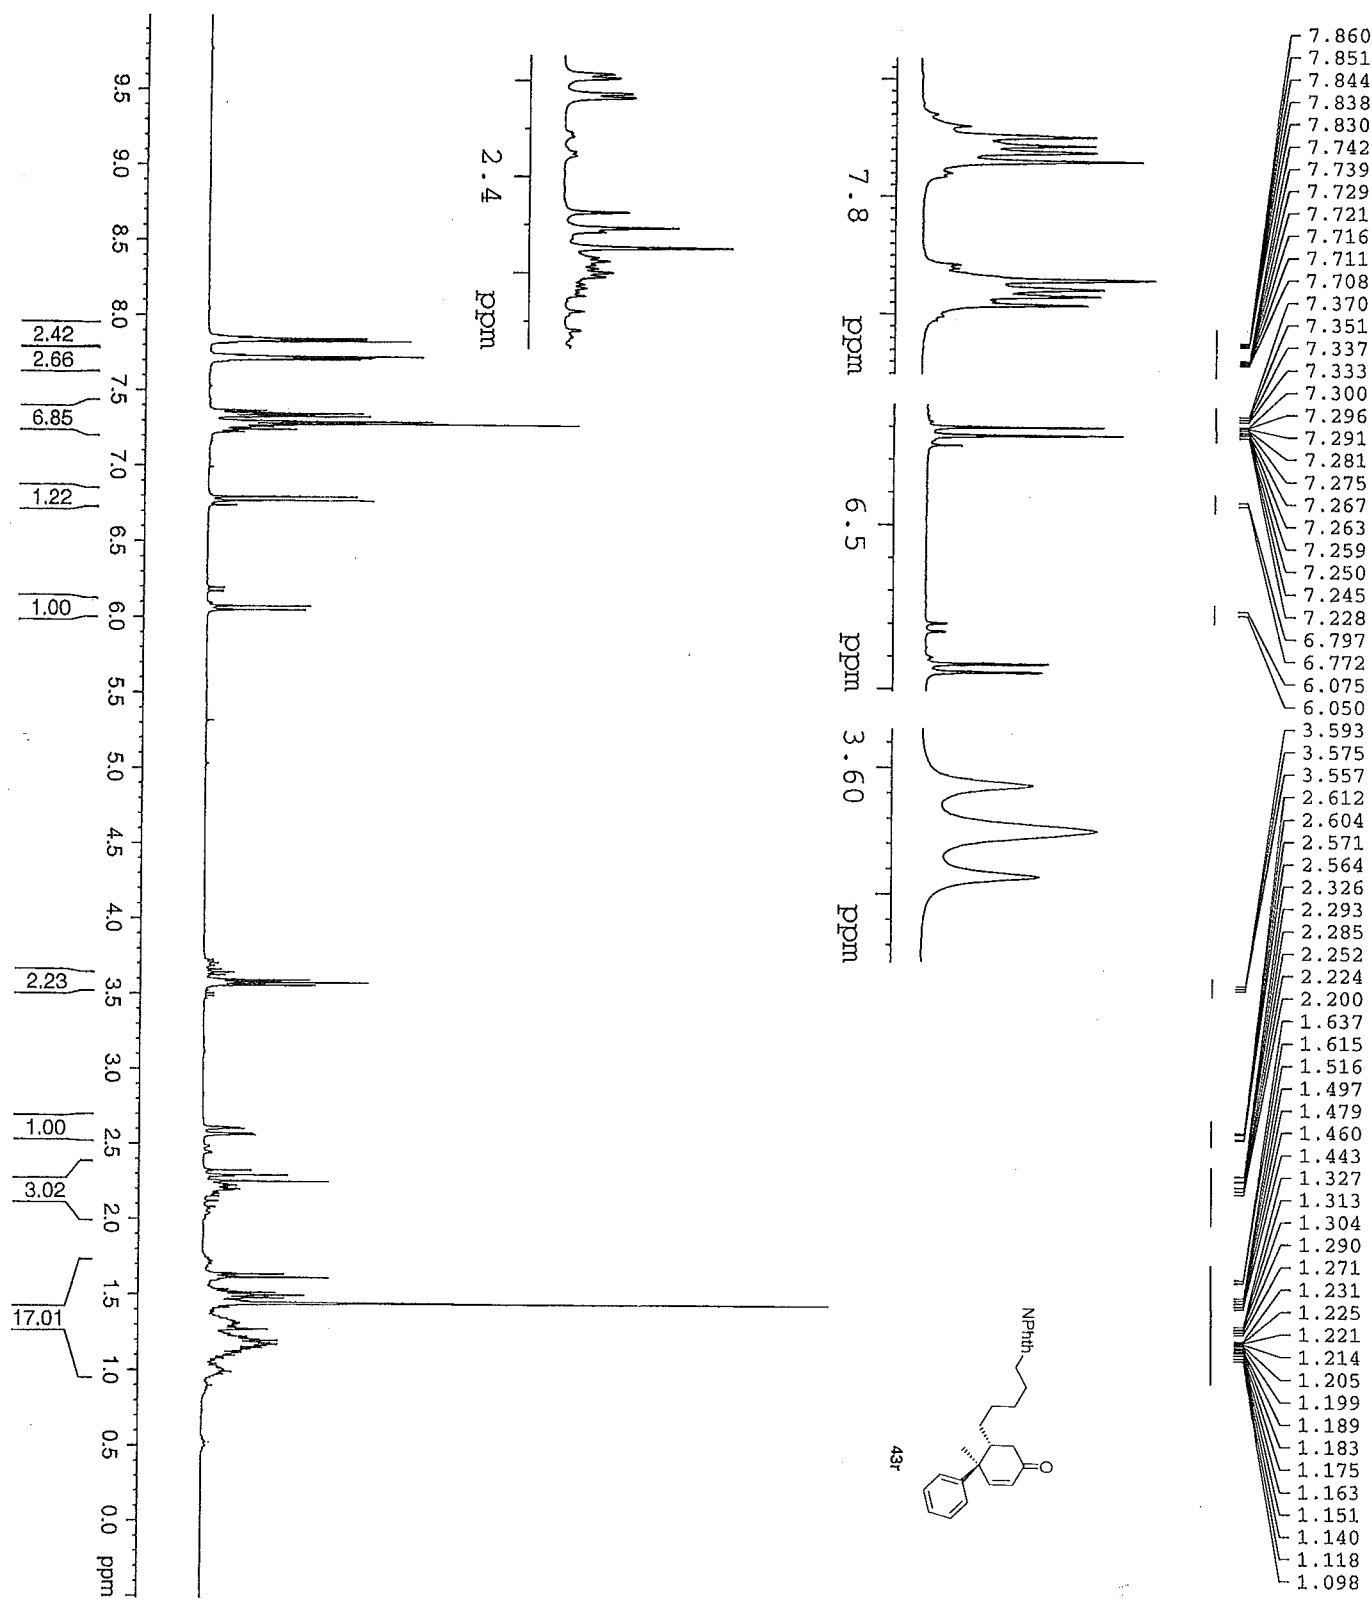

Current Data Parameters  
NAME HT15-62  
EXPNO 1  
PROCNO 1  
DU /m  
USER Hua

F2 - Acquisition Parameters  
Date\_ 20100222  
Time 21.48  
INSTRUM DPK400  
PROBHD 5 mm BBO BB-1H  
PULPROG zg30  
TD 32768  
SOLVENT CDCl3  
NS 2  
DS 2  
SWH 6410.255 Hz  
FIDRES 0.195625 Hz  
AQ 2.5595540 sec  
RG 322.5  
DW 78.000 usec  
DE 6.00 usec  
TE 298.2 K  
D1 1.00000000 sec  
TDO 1

==== CHANNEL f1 =====  
NUC1 1H  
P1 13.50 usec  
PL -3.00 dB  
SFO1 400.2478017 MHz

F2 - Processing parameters  
SI 32768  
SF 400.2450000 MHz  
WDW EM  
SSB 0  
LB 0.30 Hz  
GB 0  
PC 1.00

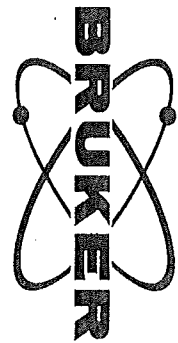

Current Data Parameters  
NAME HY15-62  
EXPTNO 2  
PROCNO 1

F2 - Acquisition Parameters  
Date\_ 20100223

Time 5.34  
INSTRUM DPX400  
PROBHD 5 mm BBO BB-1H  
PULPROG zgpg30  
TD 65536  
SOLVENT CDCl3  
NS 8024  
DS 4  
SWH 23980.814 Hz  
FIDRES 0.365918 Hz  
AQ 1.3664756 sec  
RG 7298.2  
DW 20.850 usec  
DE 6.00 usec  
TE 299.2 K  
D1 2.00000000 sec  
d11 0.03000000 sec  
DELTA 1.89999998 sec  
TD0 1

===== CHANNEL f1 =====  
NUC1 13C  
P1 8.30 usec  
PL1 -3.00 dB  
SFO1 100.6517495 MHz

===== CHANNEL f2 =====  
CPDPRG2 waltz16  
NUC2 1H  
PCPD2 90.00 usec  
PL2 -3.00 dB  
PL12 15.00 dB  
PL13 15.00 dB  
SFO2 400.2466010 MHz

F2 - Processing parameters  
SI 32768  
SF 100.6416850 MHz  
WDW EM  
SSB 0  
LB 3.00 Hz  
GB 0  
PC 1.40

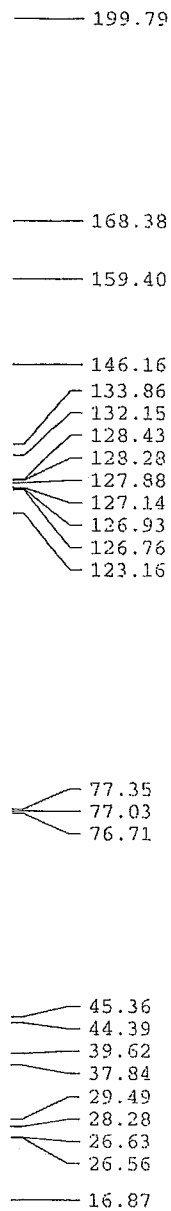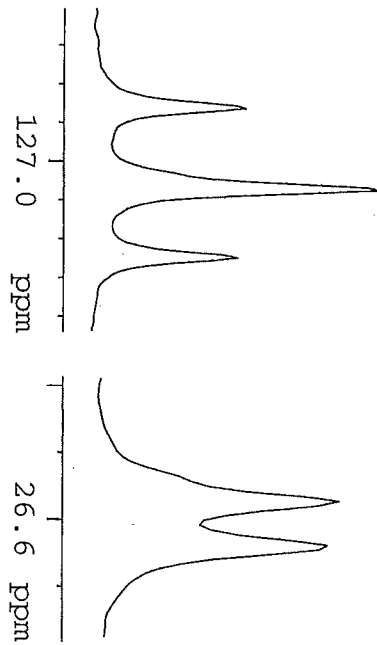

127.0 ppm

26.6 ppm

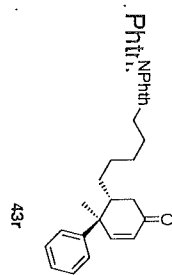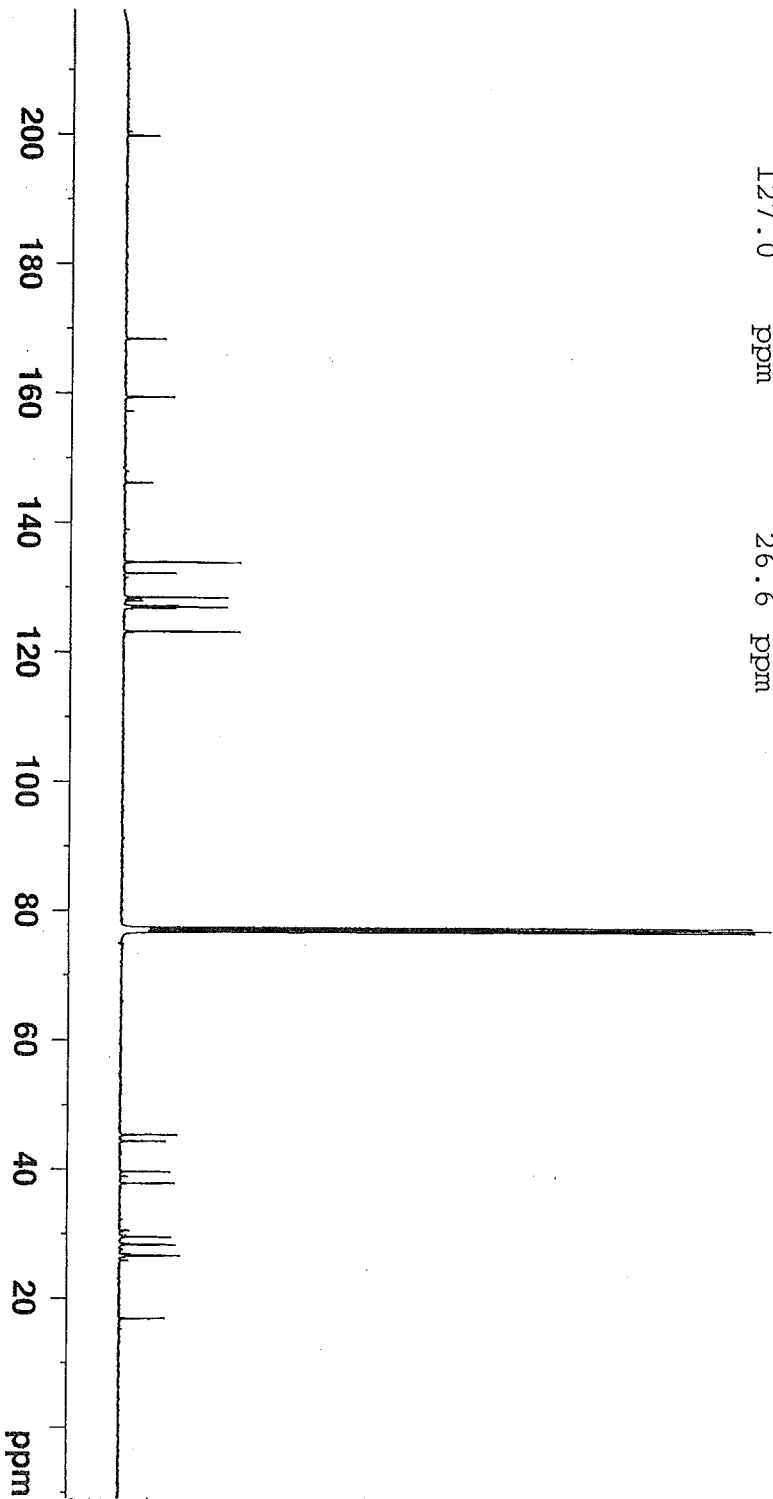



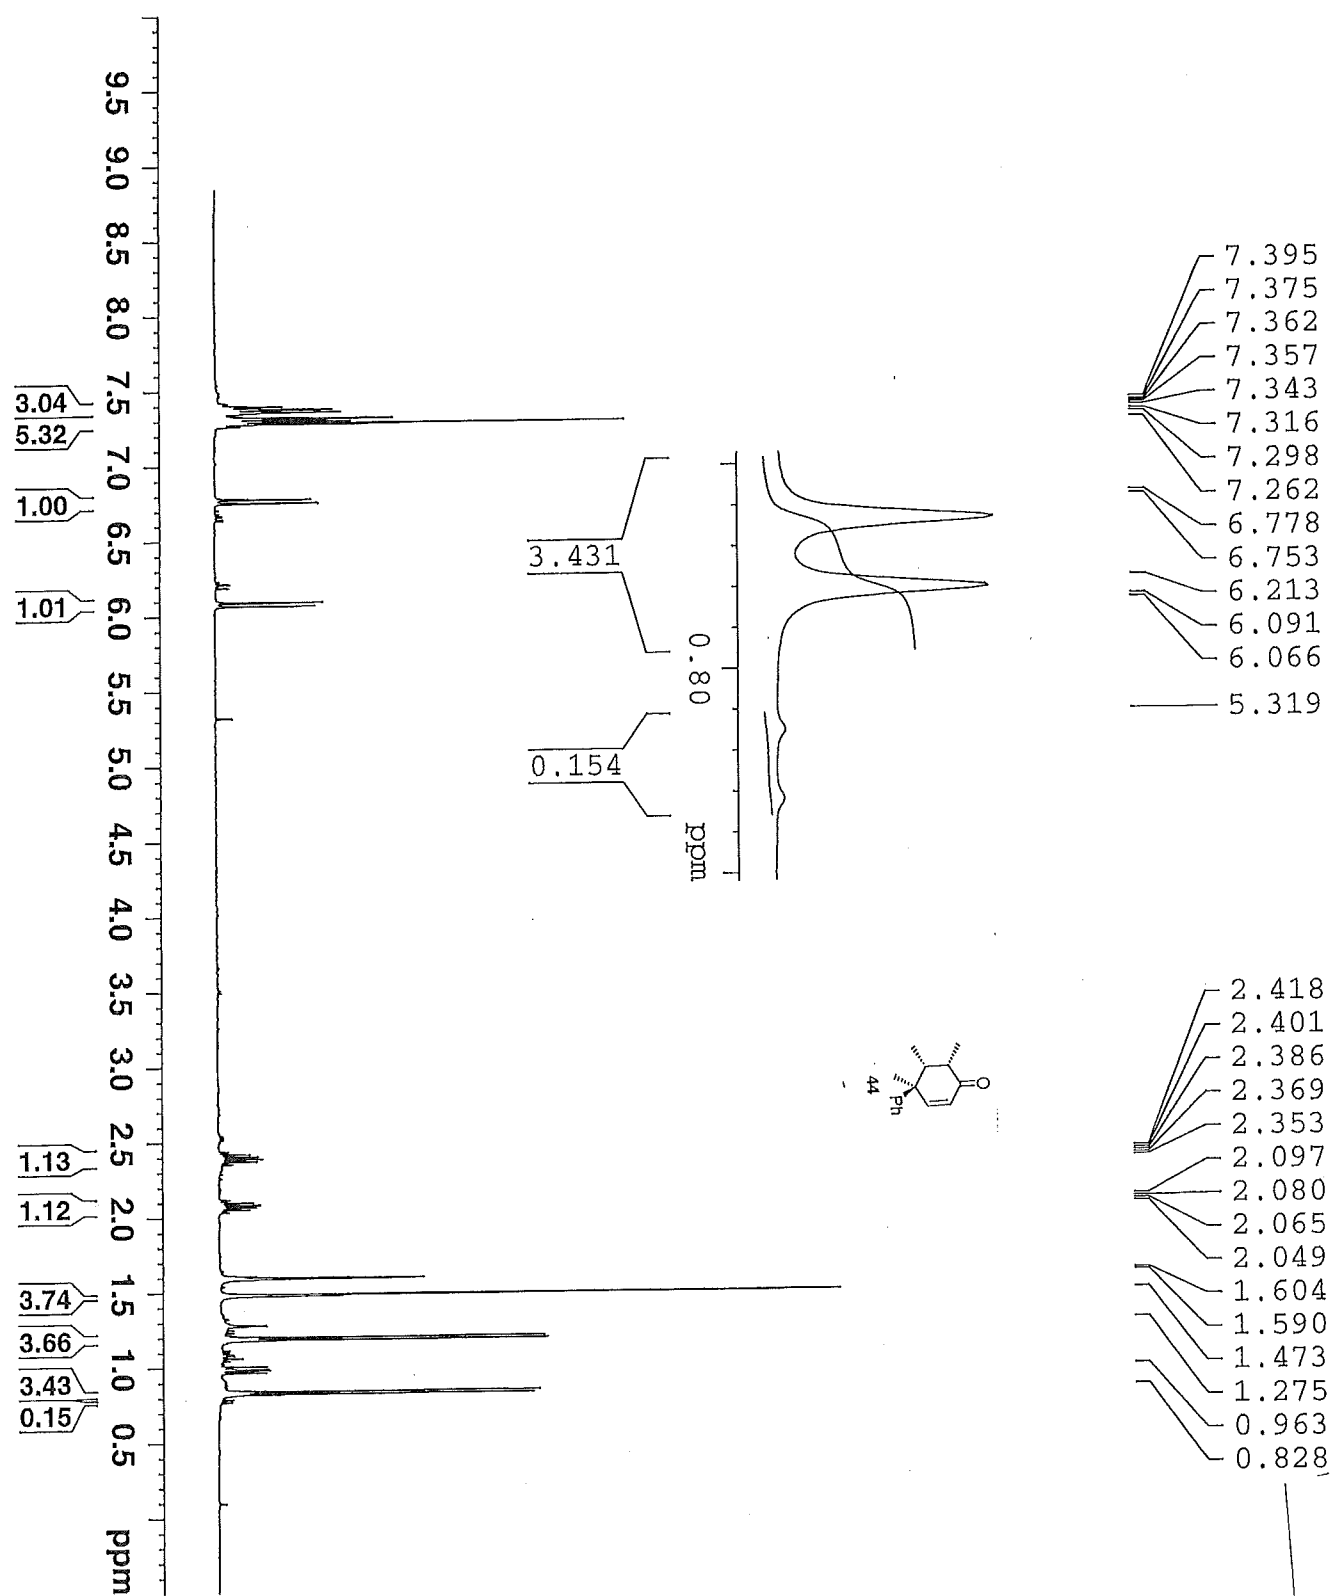

Current Data Parameters  
NAME SB-65  
EXPNO 1  
PROCNO 1

F2 - Acquisition Parameters  
Date\_ 20110809  
Time 17.03  
INSTRUM DPX400  
PROBHD 5 mm Multinucl  
PULPROG zg30  
TD 32768  
SOLVENT CDCl3  
NS 16  
DS 2  
SWH 6410.256  
FIDRES 0.195625  
AQ 2.5559540  
RG 574.7  
DW 78.000  
DE 6.00  
TE 298.2  
D1 2.0000000  
TD0 1

===== CHANNEL f1 =====  
NUC1 1H  
P1 13.50  
PL1 -3.00  
SFO1 400.2453311

F2 - Processing Parameters  
SI 32768  
SF 400.2450000  
WDW EM  
SSB 0  
LB 0.30  
GB 0  
PC 1.00

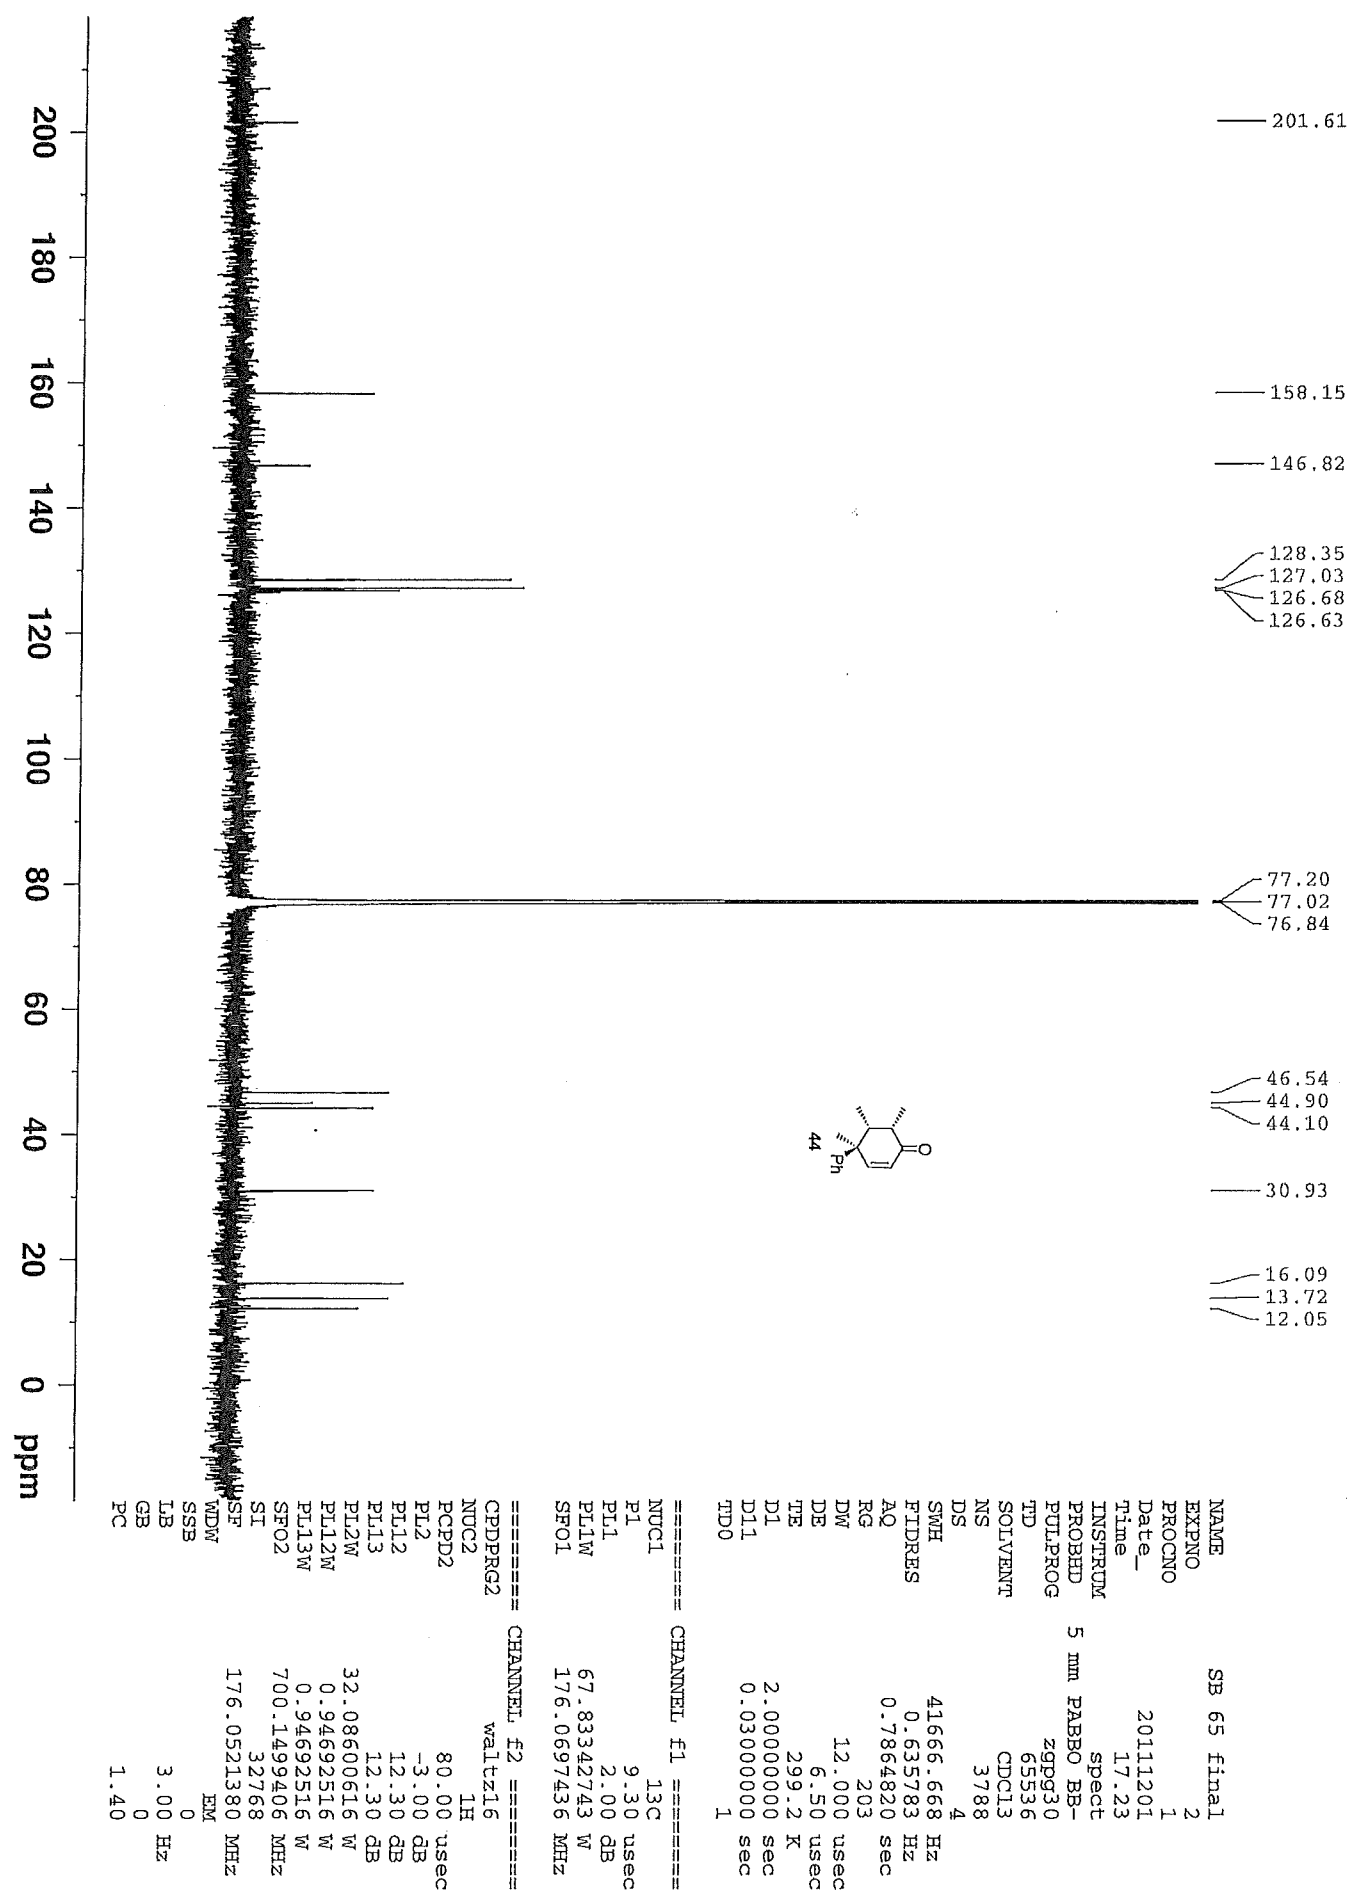

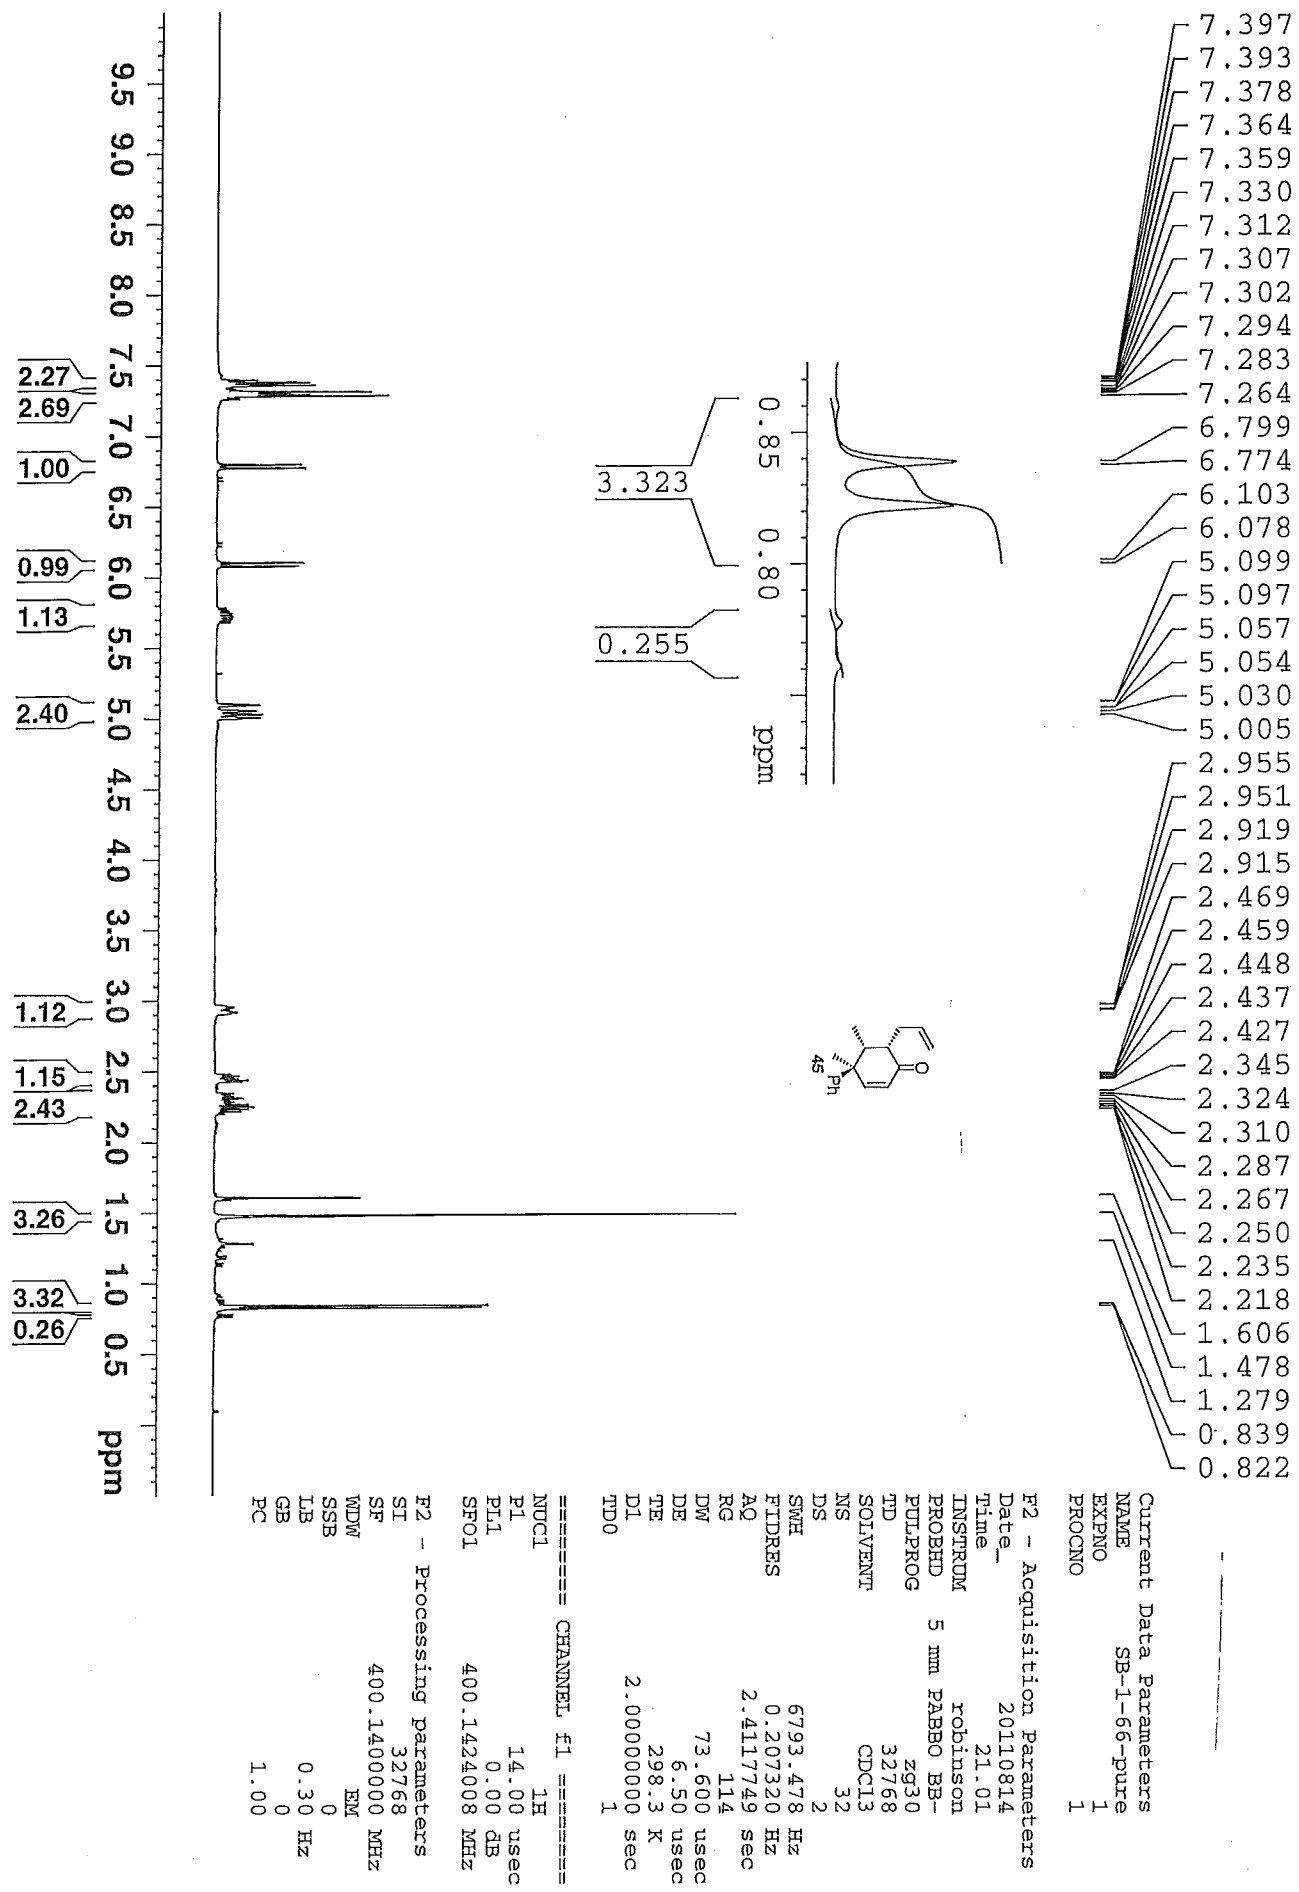

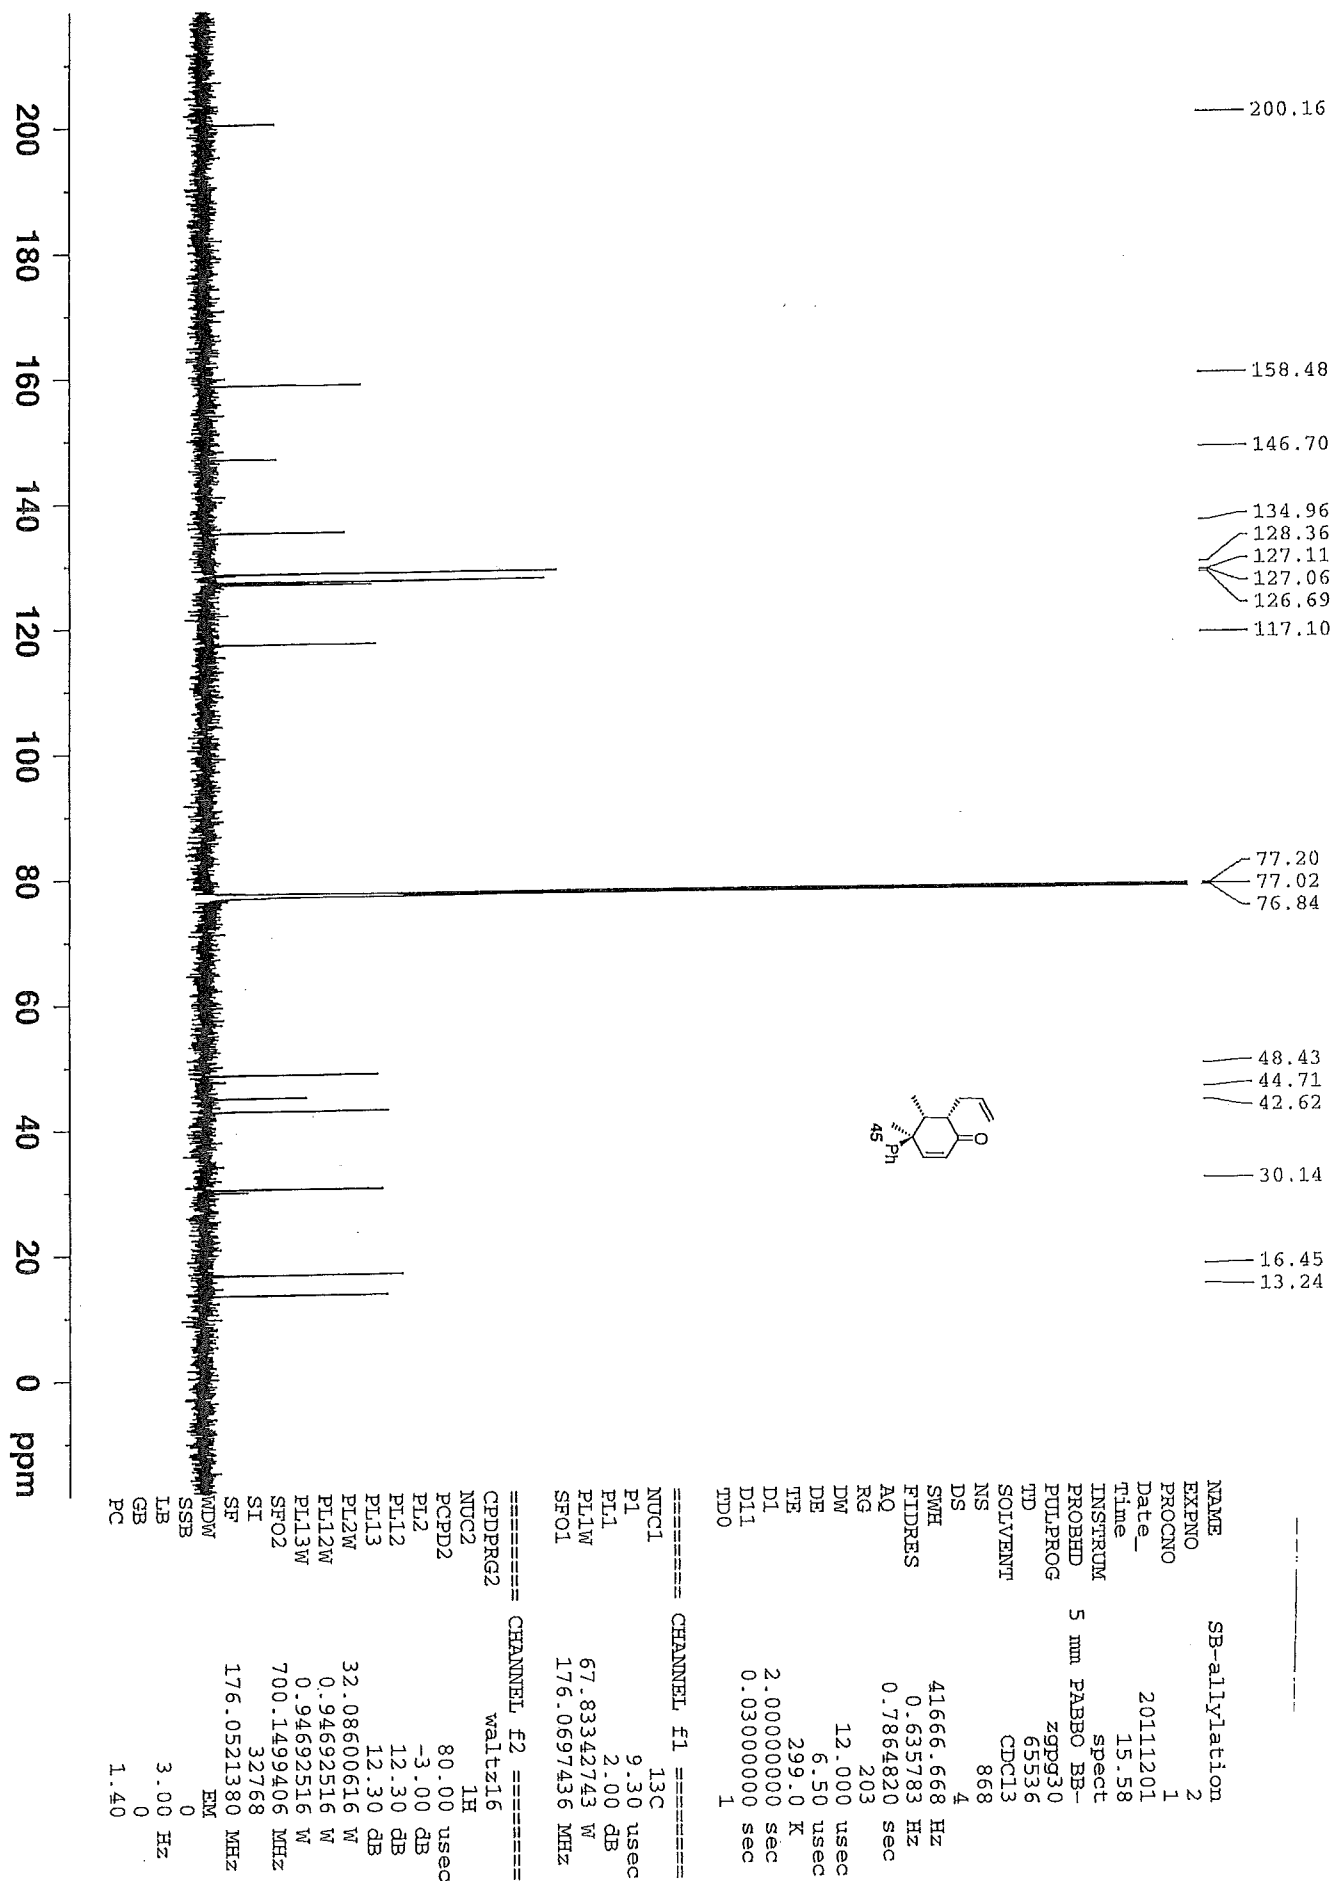

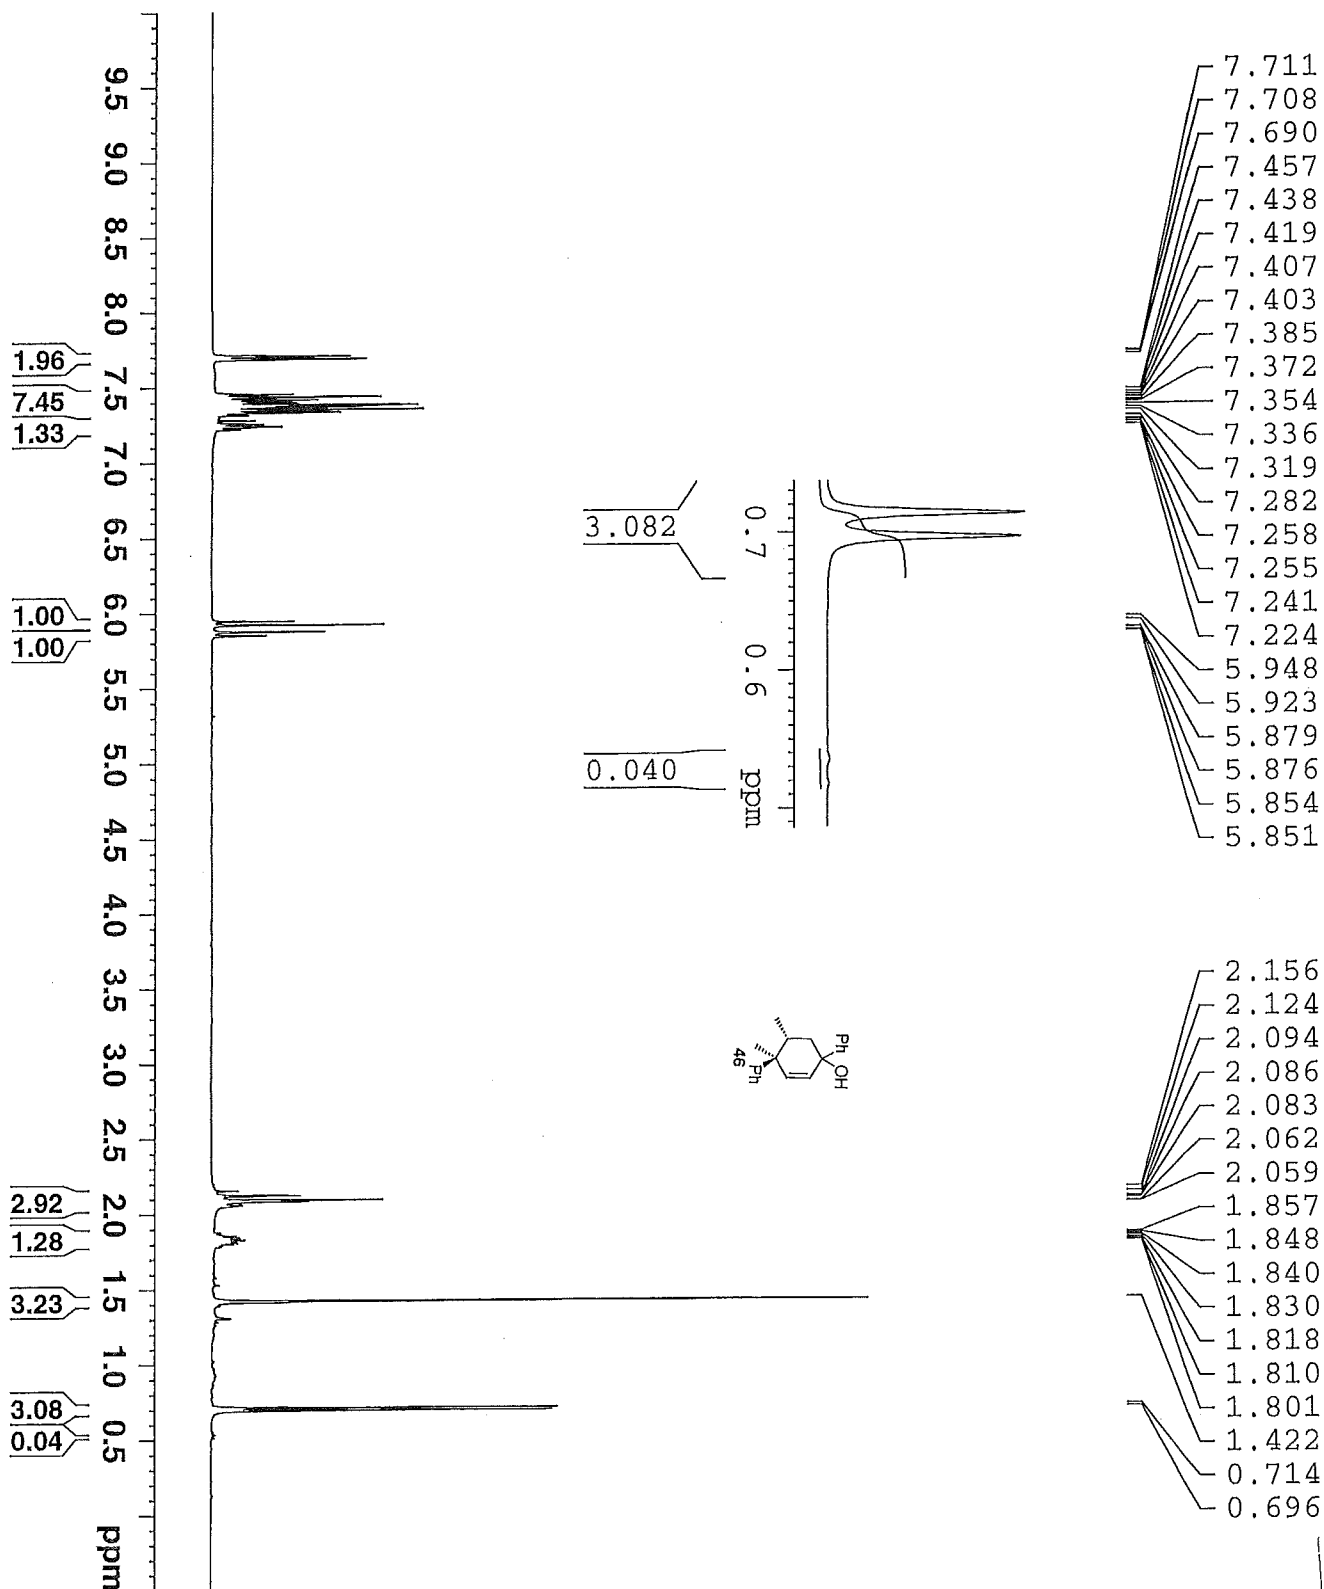

Current Data Parameters  
NAME SB-1-1,2 additi  
EXPNO 1  
PROCNO 1

F2 - Acquisition Parameters  
Date\_ 20110814  
Time 23.08  
INSTRUM robinson  
PROBHD 5 mm PABBO BB-  
PULPROG zg30  
TD 32768  
SOLVENT CDCl3  
NS 29  
DS 2  
SWH 6793.478  
FIDRES 0.207320  
AQ 2.4117749  
RG 35.9  
DE 73.600  
TE 298.2  
D1 2.00000000  
TD0 1

===== CHANNEL f1 =====  
NUC1 1H  
P1 14.00  
PL1 0.00  
SF01 400.1424008

F2 - Processing parameters  
SI 32768  
SF 400.1400000  
WDW EM  
SSB 0  
LB 0.30  
GB 0  
PC 1.00

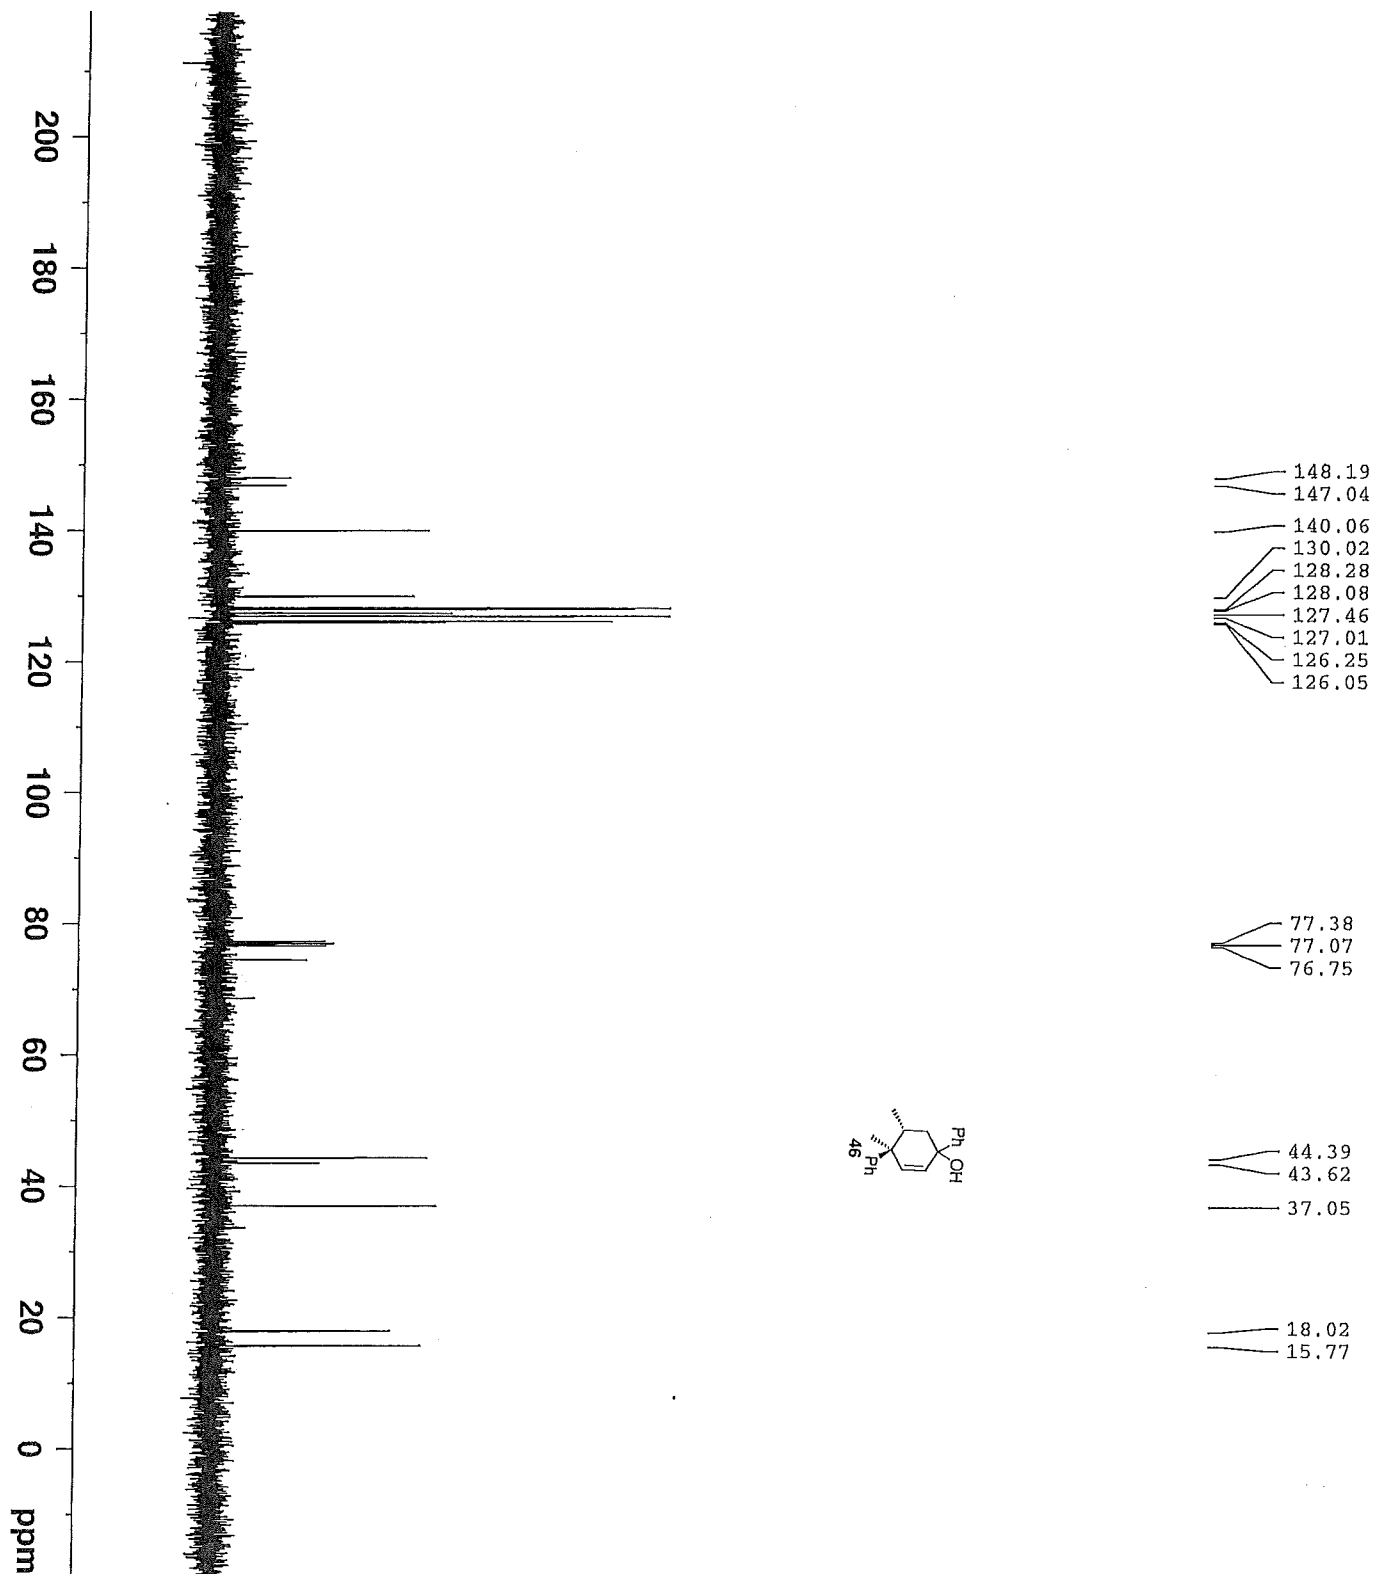

Current Data Parameters  
NAME SB-1-1,2 additio  
EXPNO 3  
PROCNO 1

F2 - Acquisition Parameters  
Date\_ 20110814  
Time 23.12  
INSTRUM robinson  
PROBHD 5 mm PABBO BB-  
PULPROG zgpg30  
TD 65536  
SOLVENT CDCl3  
NS 318  
DS 4  
SWH 23980.814 H  
FIDRES 0.365918 H  
AQ 1.3664756 s  
RG 1149.4  
DW 20.850 u  
DE 6.50 u  
TE 298.7 K  
D1 0.2000000 s  
D11 0.0300000 s  
TD0 1

===== CHANNEL f1 =====  
NUC1 13C  
P1 9.00 u  
PL1 -2.00 d  
SFO1 100.6253446 M

===== CHANNEL f2 =====  
CPDPRG2 waltz16  
NUC2 1H  
PCPD2 90.00 u  
PL2 0.00 d  
PLA2 16.16 d  
PL13 17.00 d  
SFO2 400.1416006 M

F2 - Processing parameter  
SI 32768  
SF 100.6152830 M  
WDW EM  
SSB 0  
LB 1.00 H  
GB 0  
PC 1.40

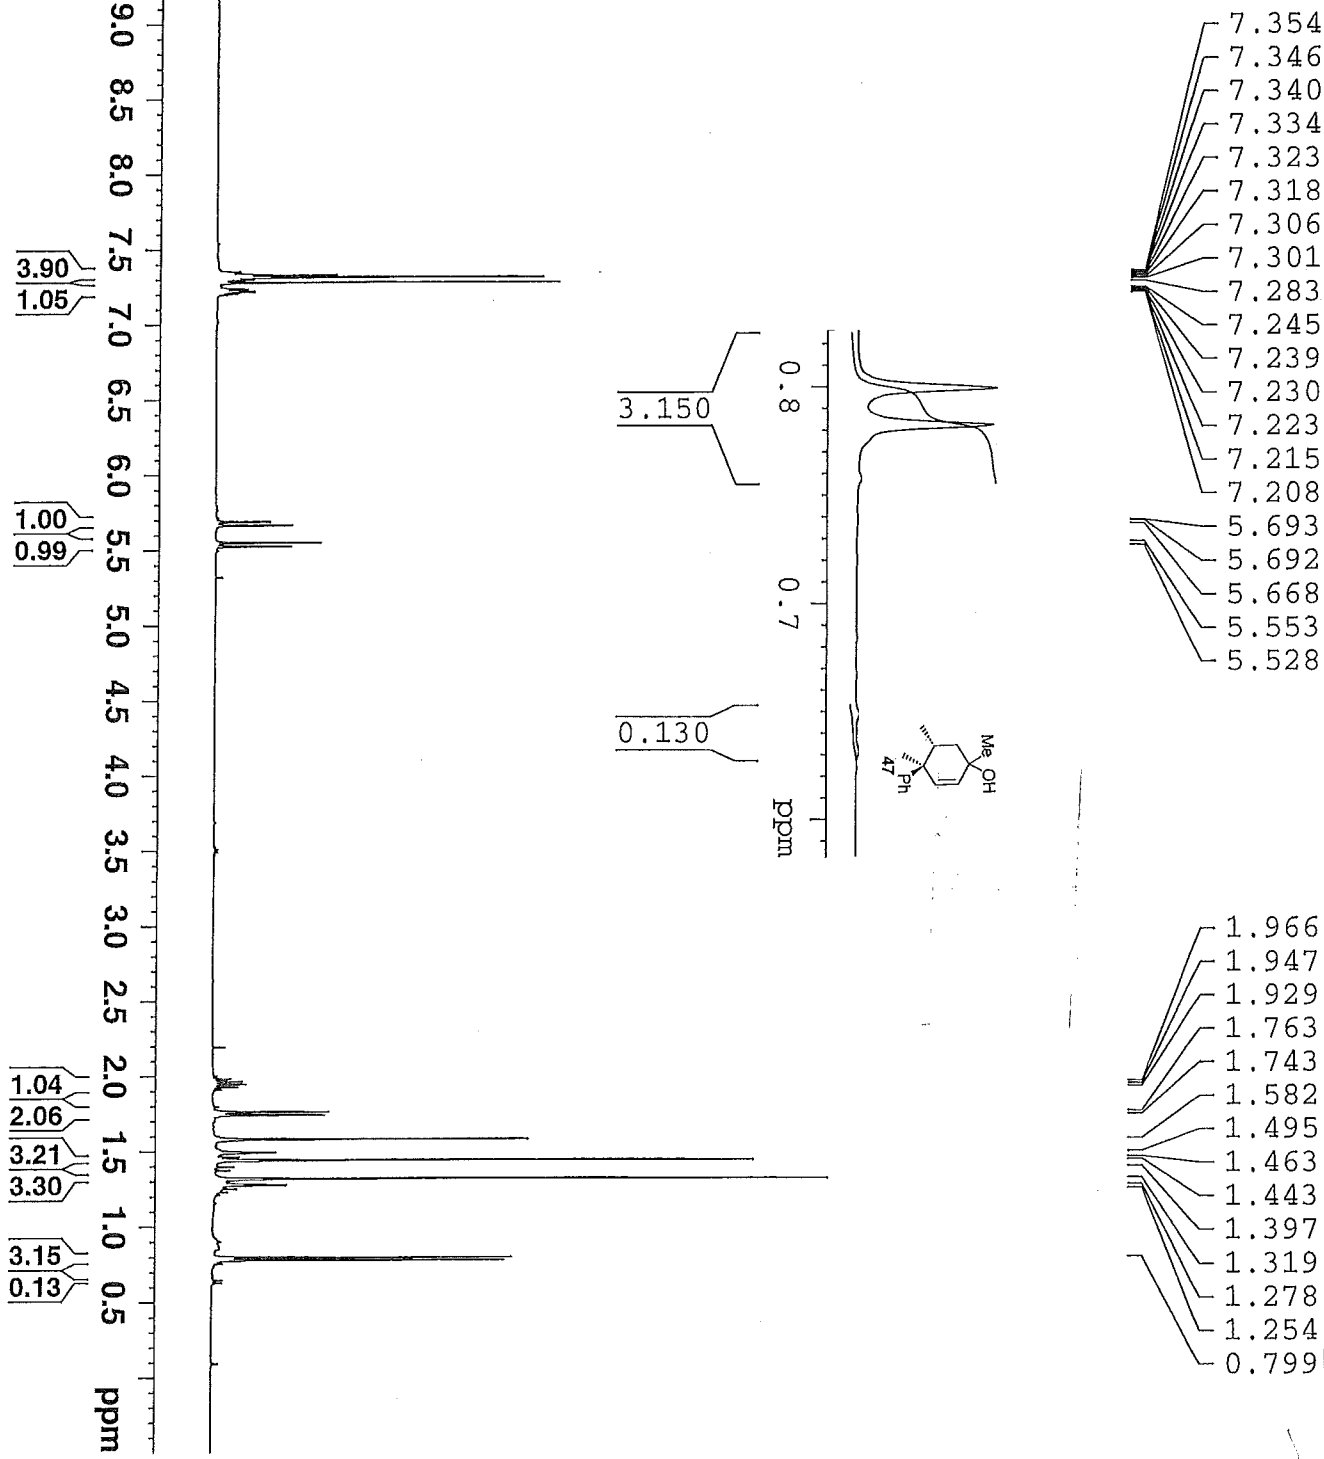

|                             |                |
|-----------------------------|----------------|
| Current Data Parameters     |                |
| NAME                        | SB-68 pure     |
| EXPNO                       | 3              |
| PROCNO                      | 1              |
| F2 - Acquisition Parameters |                |
| Date_                       | 20110818       |
| Time                        | 16.04          |
| INSTRUM                     | robinson       |
| PROBHD                      | 5 mm PABBO BB- |
| PULPROG                     | zg30           |
| TD                          | 32768          |
| SOLVENT                     | CDCl3          |
| NS                          | 23             |
| DS                          | 2              |
| SWH                         | 6793.478       |
| FIDRES                      | 0.207320       |
| AQ                          | 2.4117749      |
| RG                          | 181            |
| DW                          | 73.600         |
| DE                          | 6.50           |
| TE                          | 298.2          |
| D1                          | 2.0000000      |
| TD0                         | 1              |
| ===== CHANNEL f1 =====      |                |
| NUC1                        | 1H             |
| P1                          | 14.00          |
| PL1                         | 0.00           |
| SFO1                        | 400.1424008    |
| F2 - Processing parameters  |                |
| SI                          | 32768          |
| SF                          | 400.1400000    |
| WDW                         | EM             |
| SSB                         | 0              |
| LB                          | 0.30           |
| GB                          | 0              |
| PC                          | 1.00           |

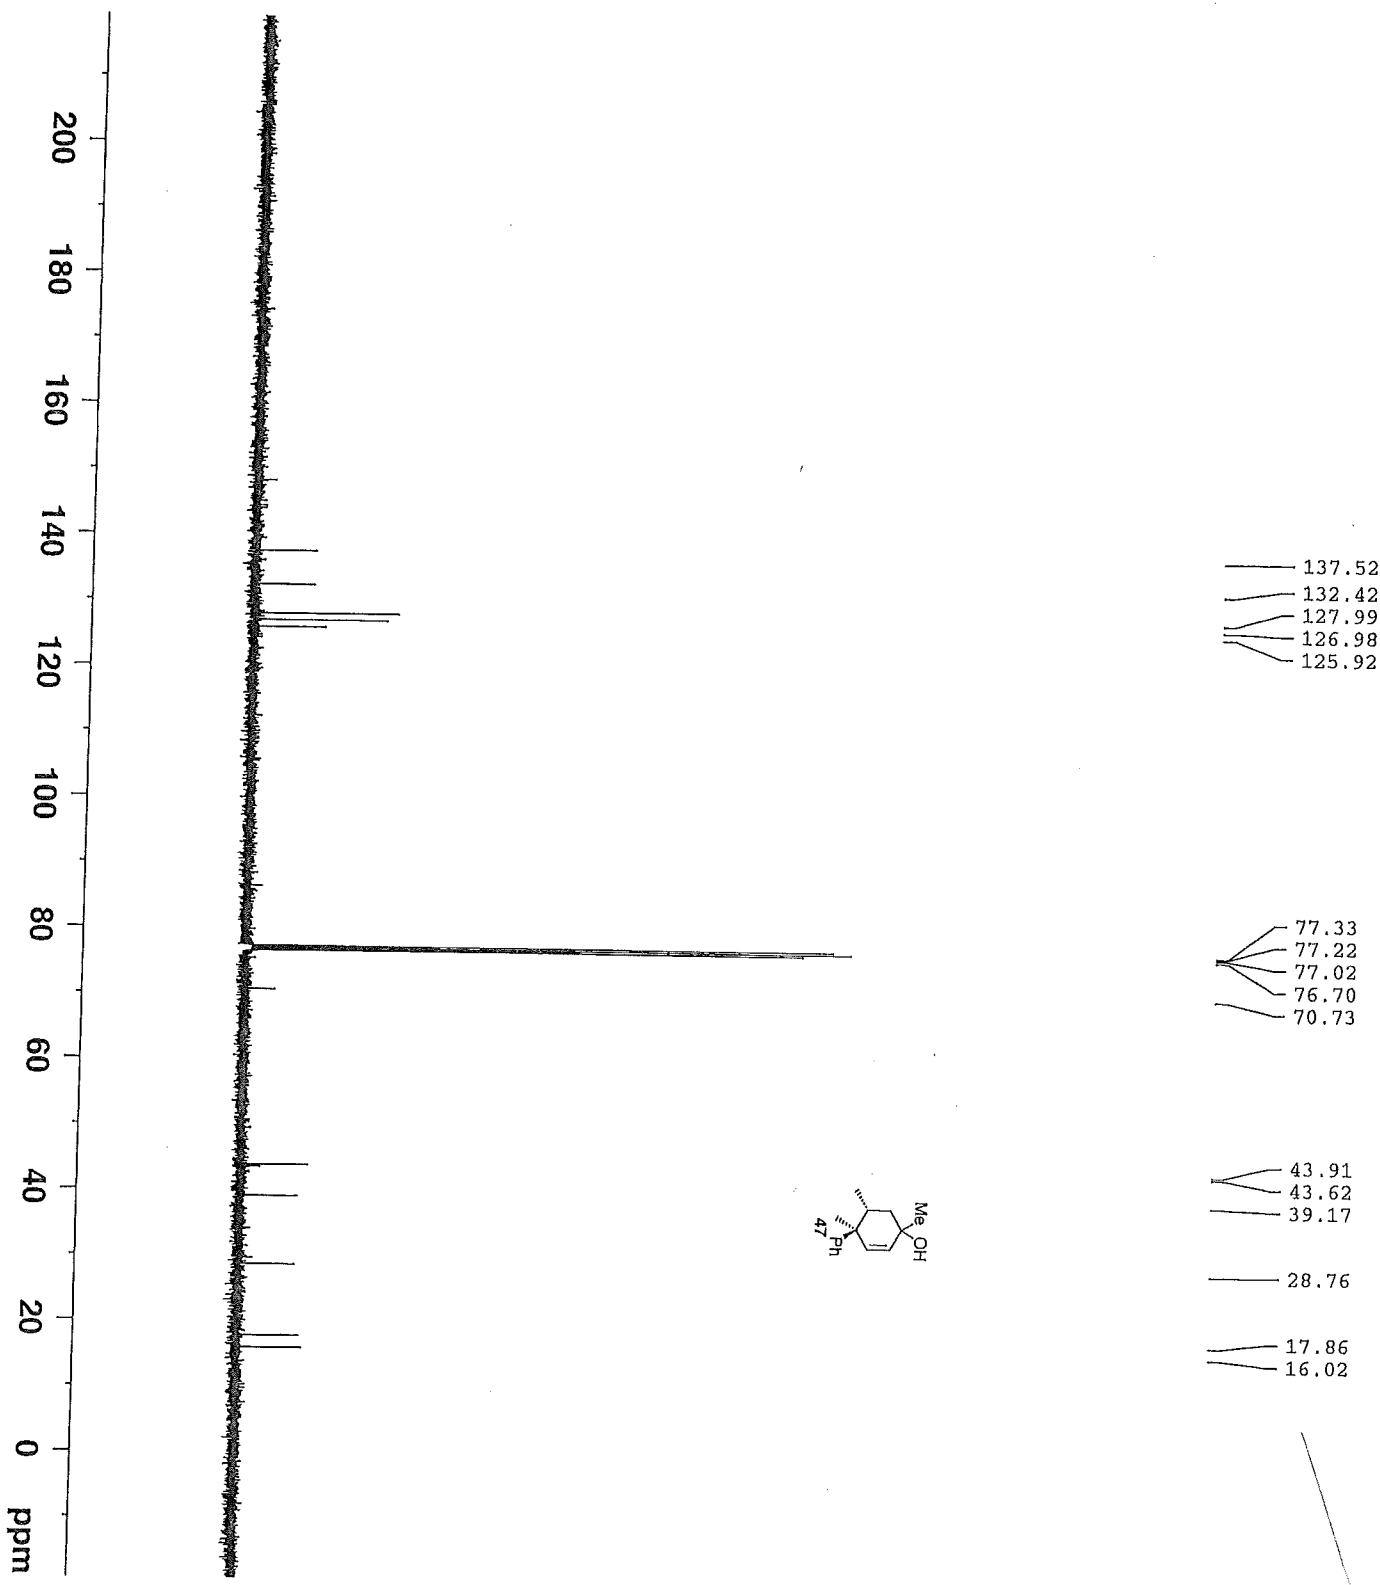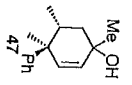

Current Data Parameters  
NAME SB-1-68 pure  
EXPNO 2  
PROCNO 1

F2 - Acquisition Parameters  
Date\_ 20110821  
Time 20.50  
INSTRUM robinson  
PROBHD 5 mm PABBO BB-  
PULPROG zgpg30  
TD 65536  
SOLVENT CDCl3  
NS 541  
DS 4  
SWH 23980.814 Hz  
FIDRES 0.365918 Hz  
AQ 1.3664756 s  
RG 18390.4  
DW 20.850 us  
DE 6.50 us  
TE 299.5 K  
D1 0.20000000 s  
D11 0.03000000 s  
TD0 1

===== CHANNEL f1 =====  
NUC1 13C  
P1 9.00 us  
PL1 -2.00 dB  
SFO1 100.6253446 MHz

===== CHANNEL f2 =====  
CPDPRG2 waltz16  
NUC2 1H  
PCPD2 90.00 us  
PL2 0.00 dB  
PL12 16.16 dB  
PL13 17.00 dB  
SFO2 400.1416006 MHz

F2 - Processing parameters:  
SI 32768  
SF 100.6152830 MHz  
WDW EM  
SSB 0  
LB 1.00 Hz  
GB 0  
PC 1.40



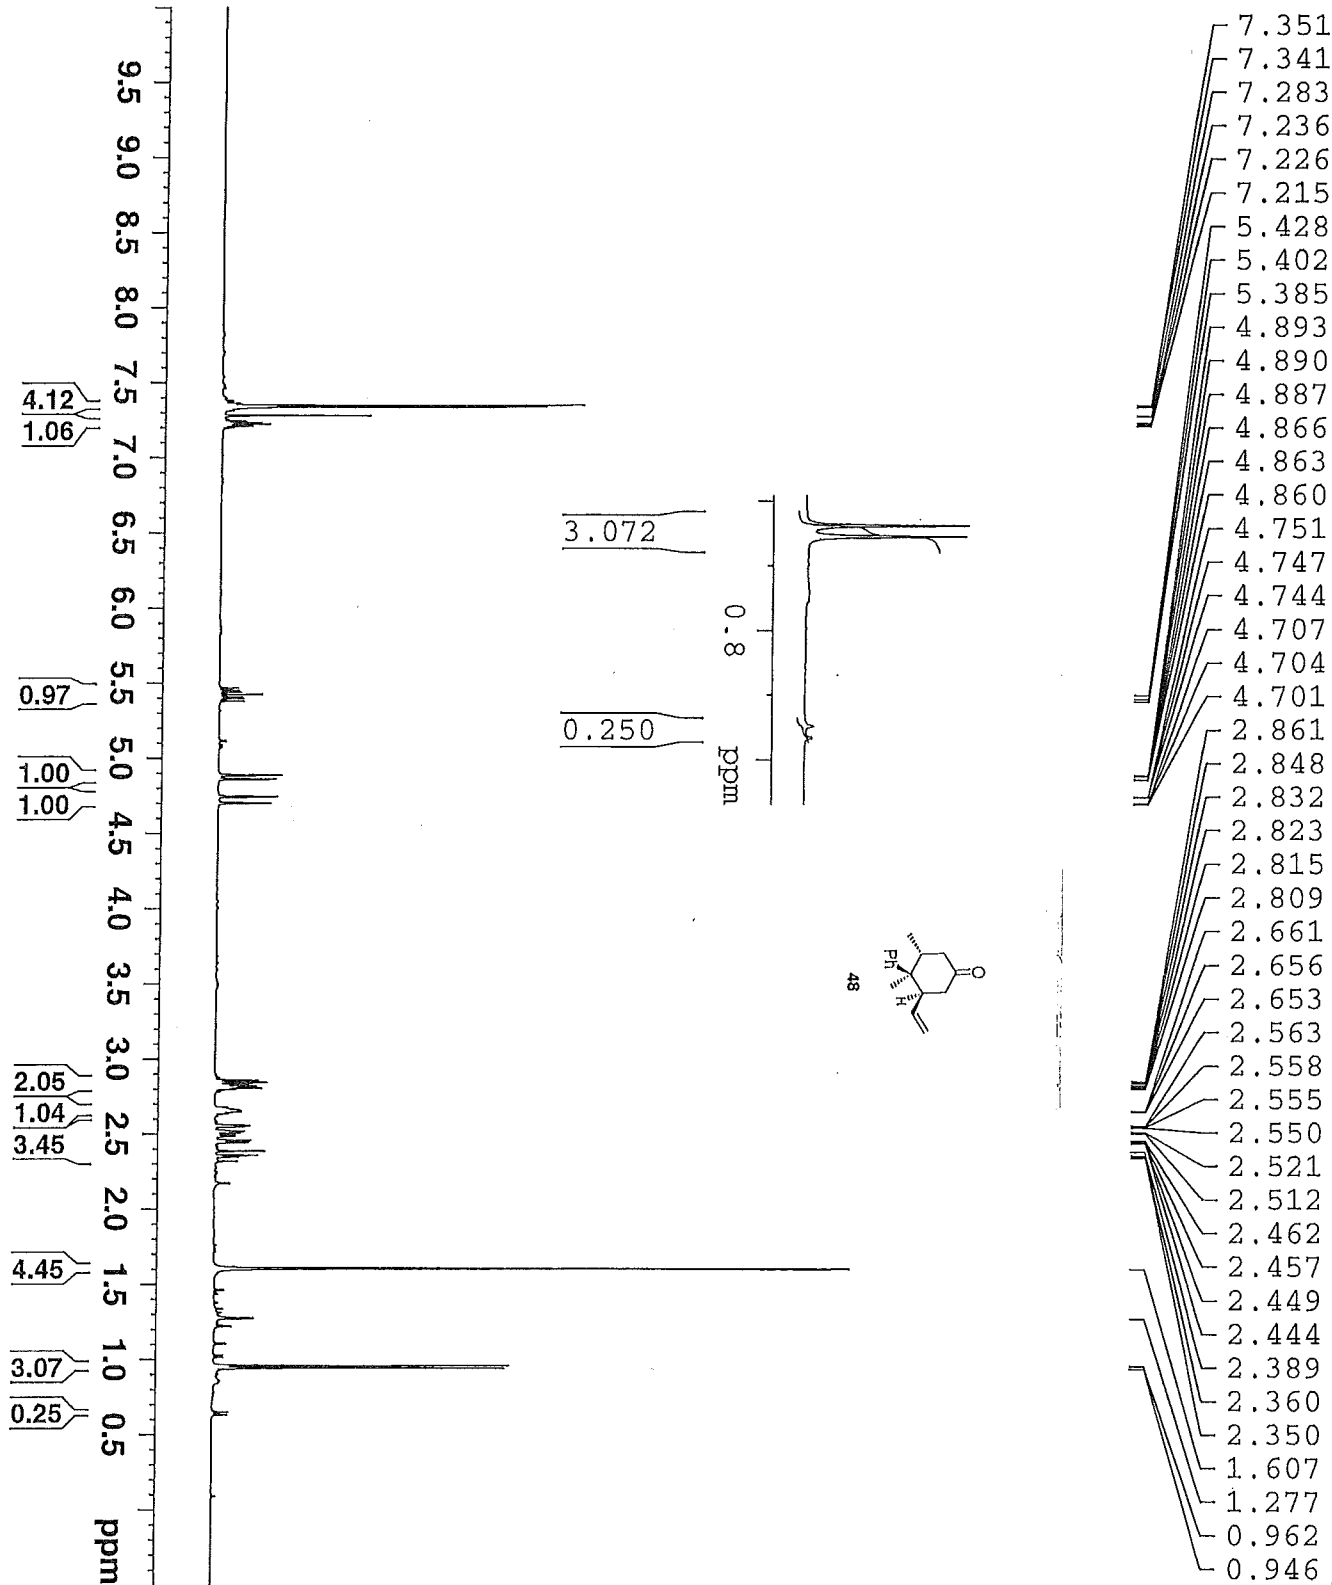

Current Data Parameters  
NAME SB-1-69 pure  
EXPNO 1  
PROCNO 1

F2 - Acquisition Parameters  
Date\_ 20110821  
Time 19.47  
INSTRUM robinson  
PROBHD 5 mm PABBO BB-  
PULPROG zg30  
TD 32768  
SOLVENT CDCl3  
NS 19  
DS 2  
SWH 6793.478  
FIDRES 0.207320  
AQ 2.4117749  
RG 128  
DW 73.600  
DE 6.50  
TE 298.2  
D1 2.0000000  
TD0 1

===== CHANNEL f1 =====  
NUC1 1H  
P1 14.00  
PL1 0.00  
SF01 400.1424008

F2 - Processing Parameters  
SI 32768  
SF 400.1400000  
WDW EM  
SSB 0  
LB 0.30  
GB 0  
PC 1.00

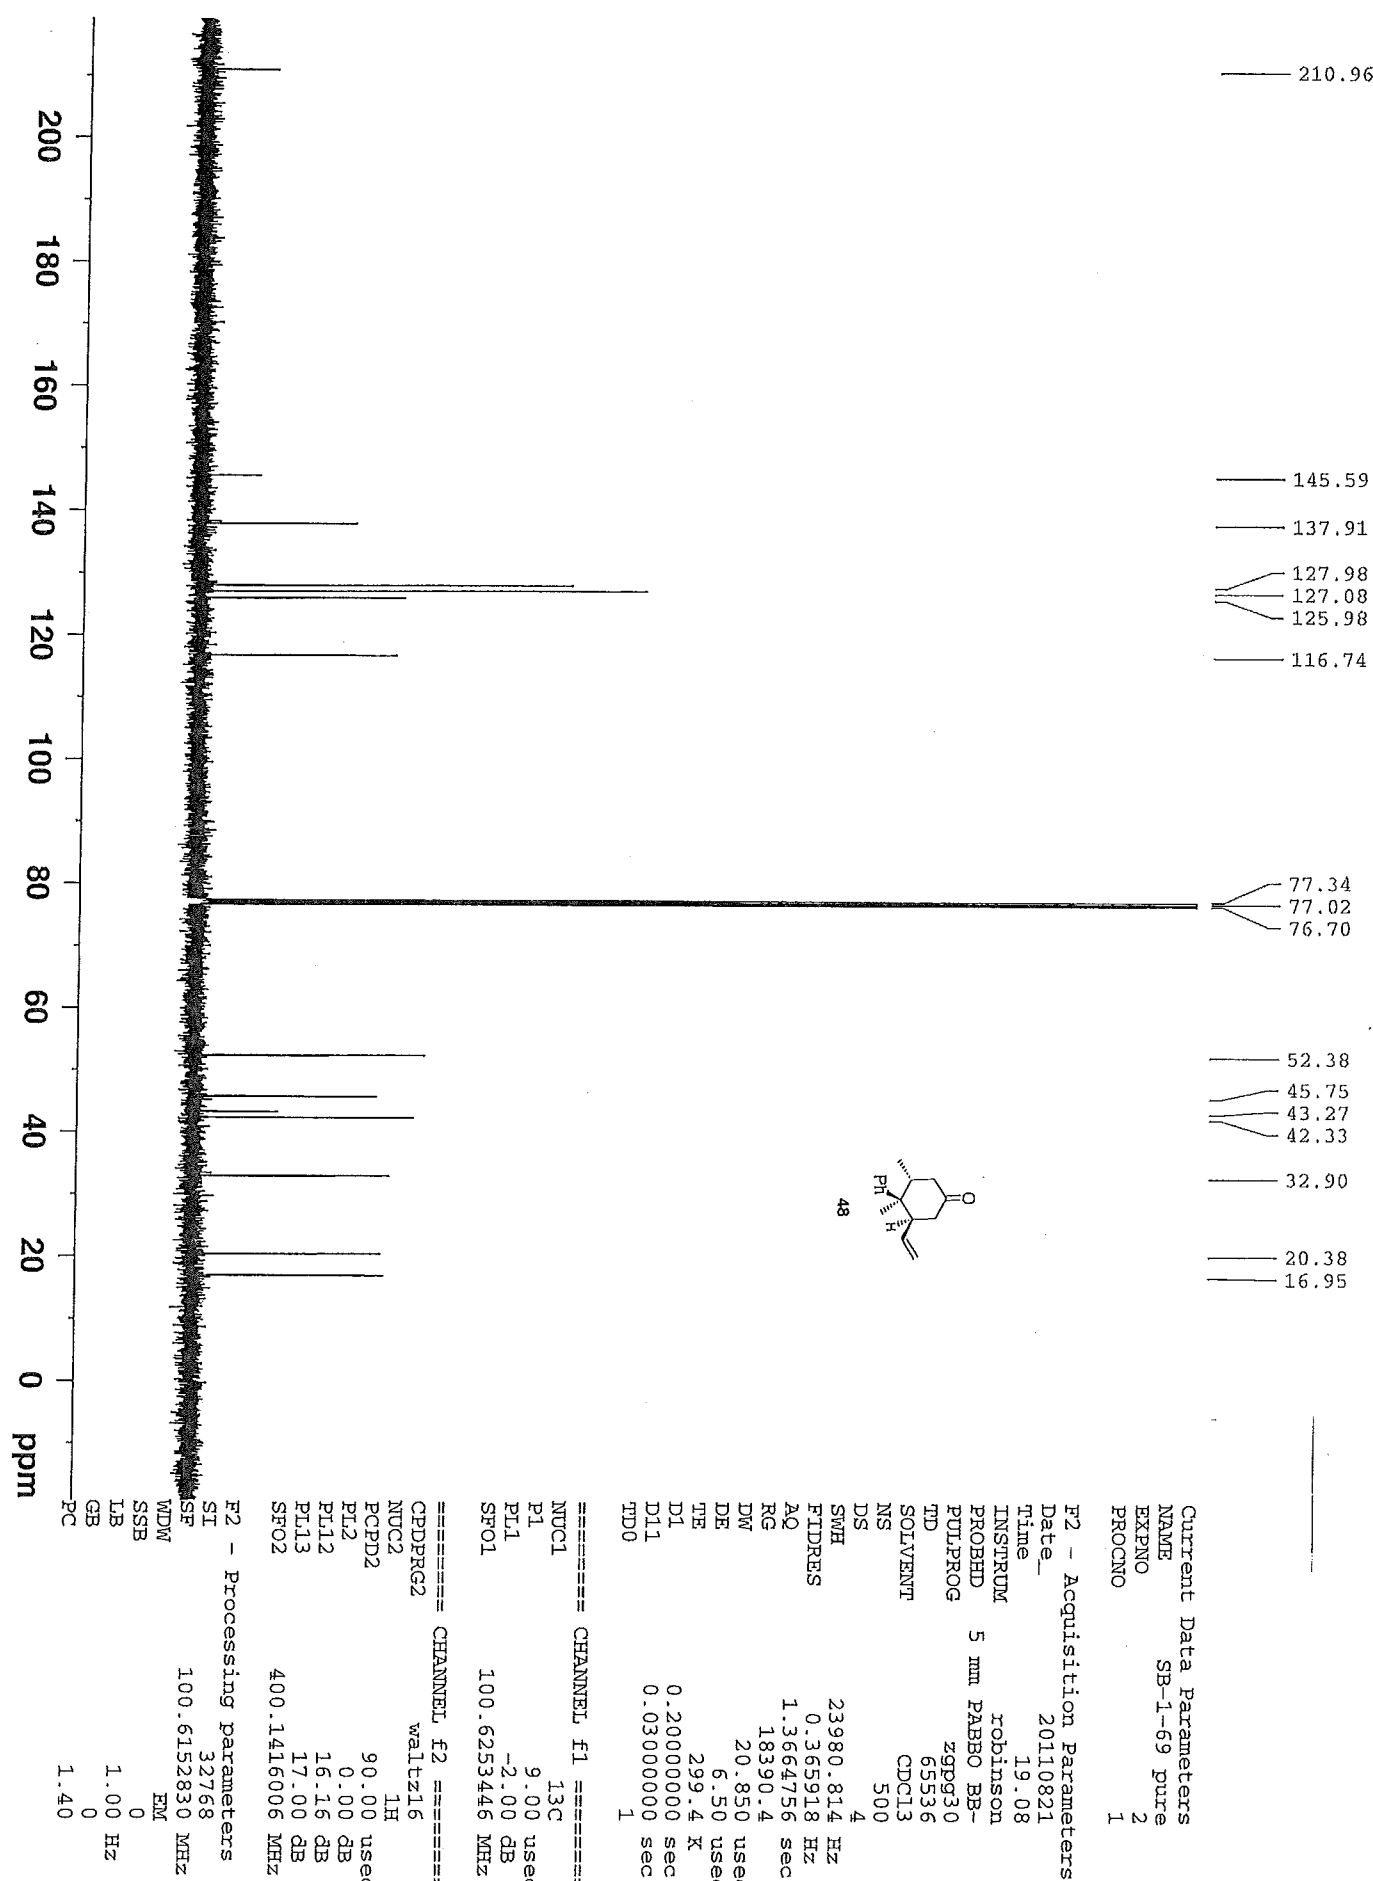

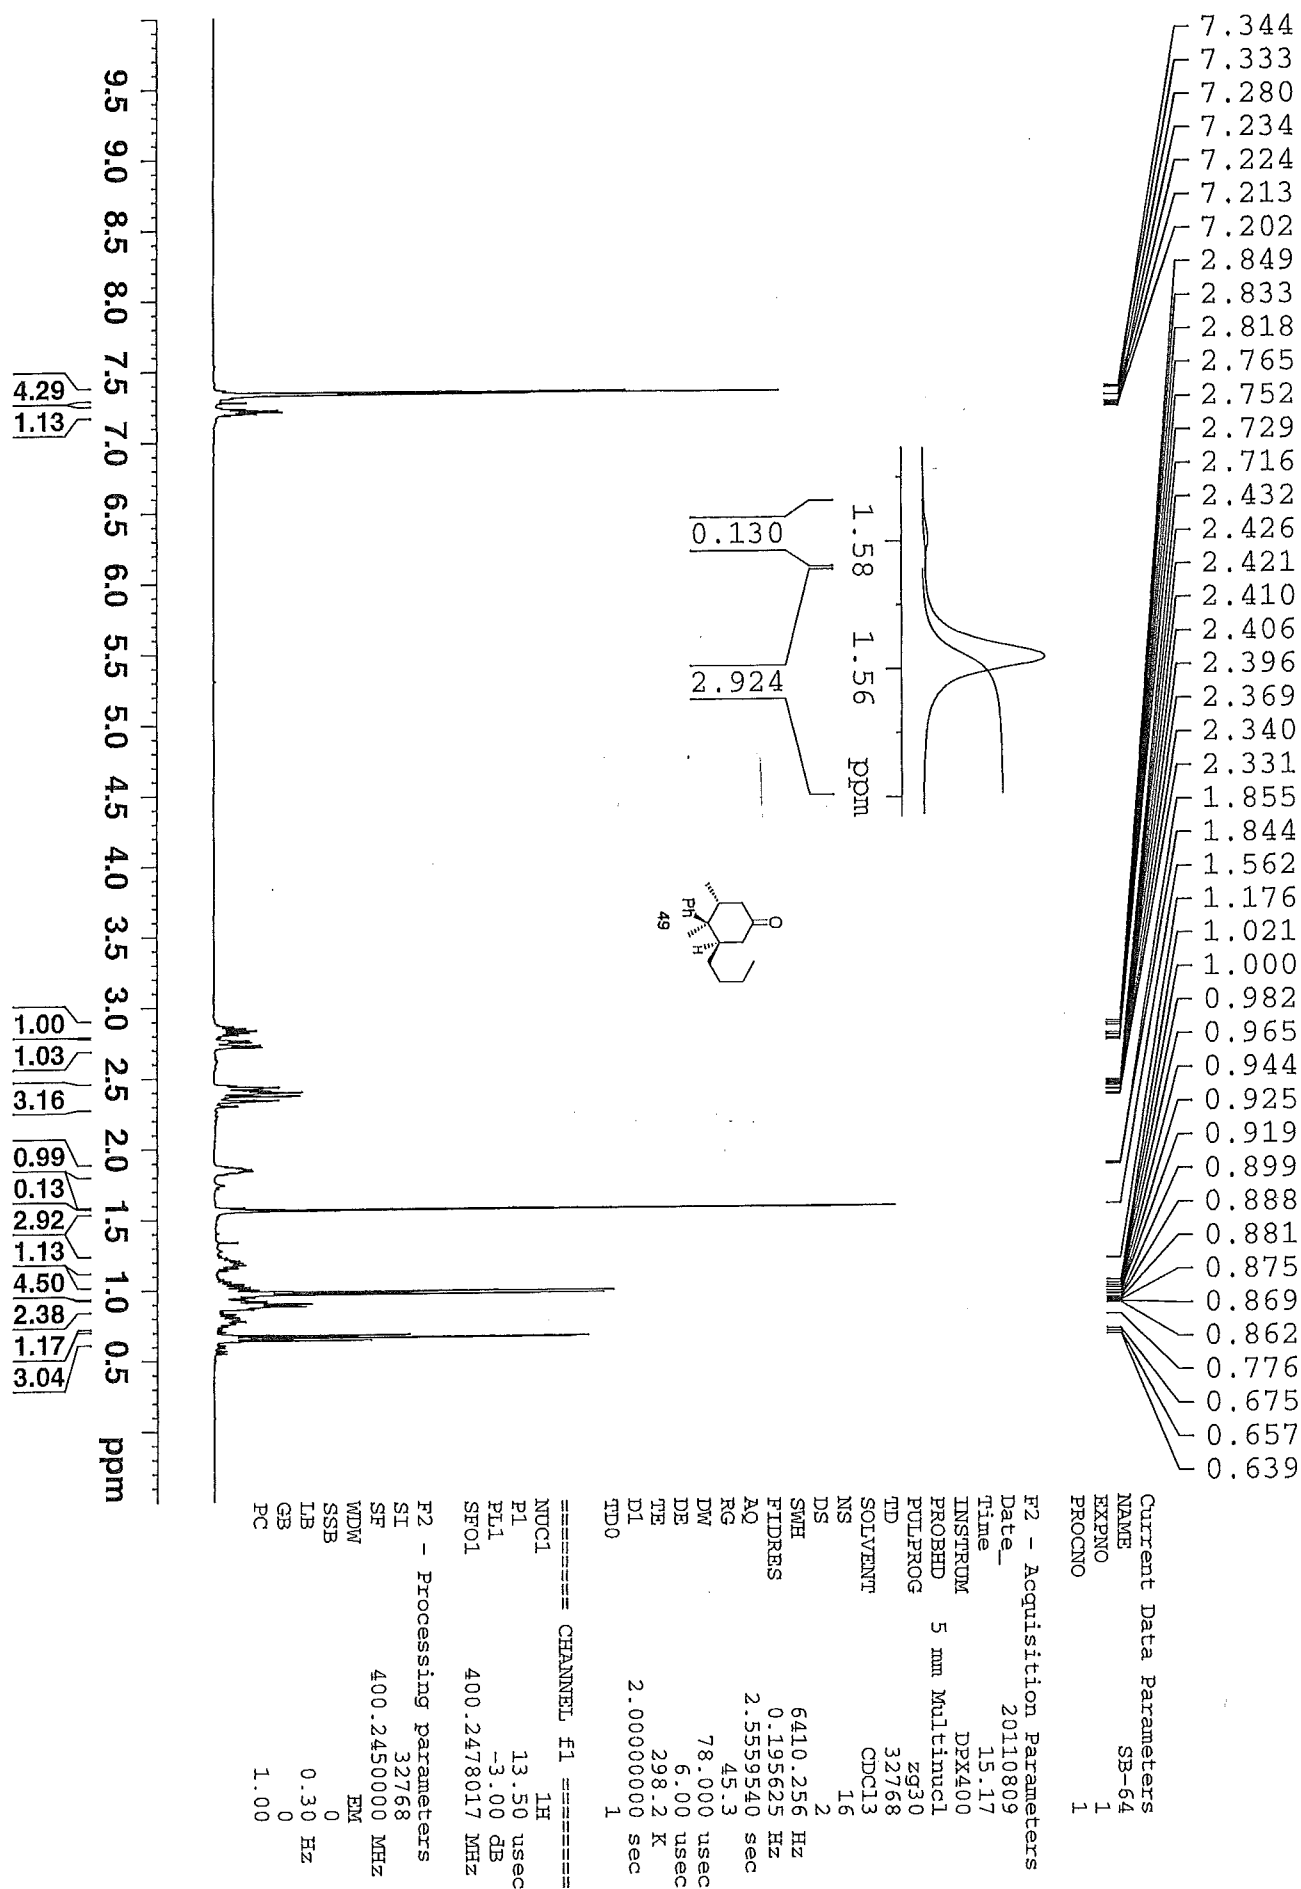

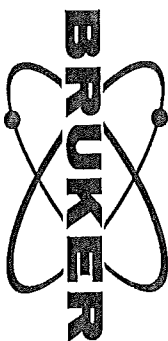

Current Data Parameters  
 NAME SB-48b  
 EXPNO 2  
 PROCNO 1

F2 - Acquisition Parameters

Date\_ 20110723  
 Time 23.29  
 INSTRUM robinson  
 PROBHD 5 mm PABBO BB-  
 PULPROG zgpg30  
 TD 65536  
 SOLVENT CDCl3  
 NS 851  
 DS 4  
 SWH 23980.814 Hz  
 FIDRES 0.365918 Hz  
 AQ 1.3664756 sec  
 RG 16384  
 DW 20.850 usec  
 DE 6.50 usec  
 TE 298.7 K  
 D1 0.20000000 sec  
 D11 0.03000000 sec  
 TD0 1

===== CHANNEL f1 =====  
 NUC1 13C  
 P1 9.00 usec  
 PL1 -2.00 dB  
 SFO1 100.6253446 MHz

===== CHANNEL f2 =====  
 CPDPRG2 waltz16  
 NUC2 1H  
 PCPD2 90.00 usec  
 PL2 0.00 dB  
 PL12 16.16 dB  
 PL13 17.00 dB  
 SFO2 400.1416006 MHz

F2 - Processing parameters  
 SI 32768  
 SF 100.6152830 MHz  
 WDW EM  
 SSB 0  
 LB 1.00 Hz  
 GB 0  
 PC 1.40

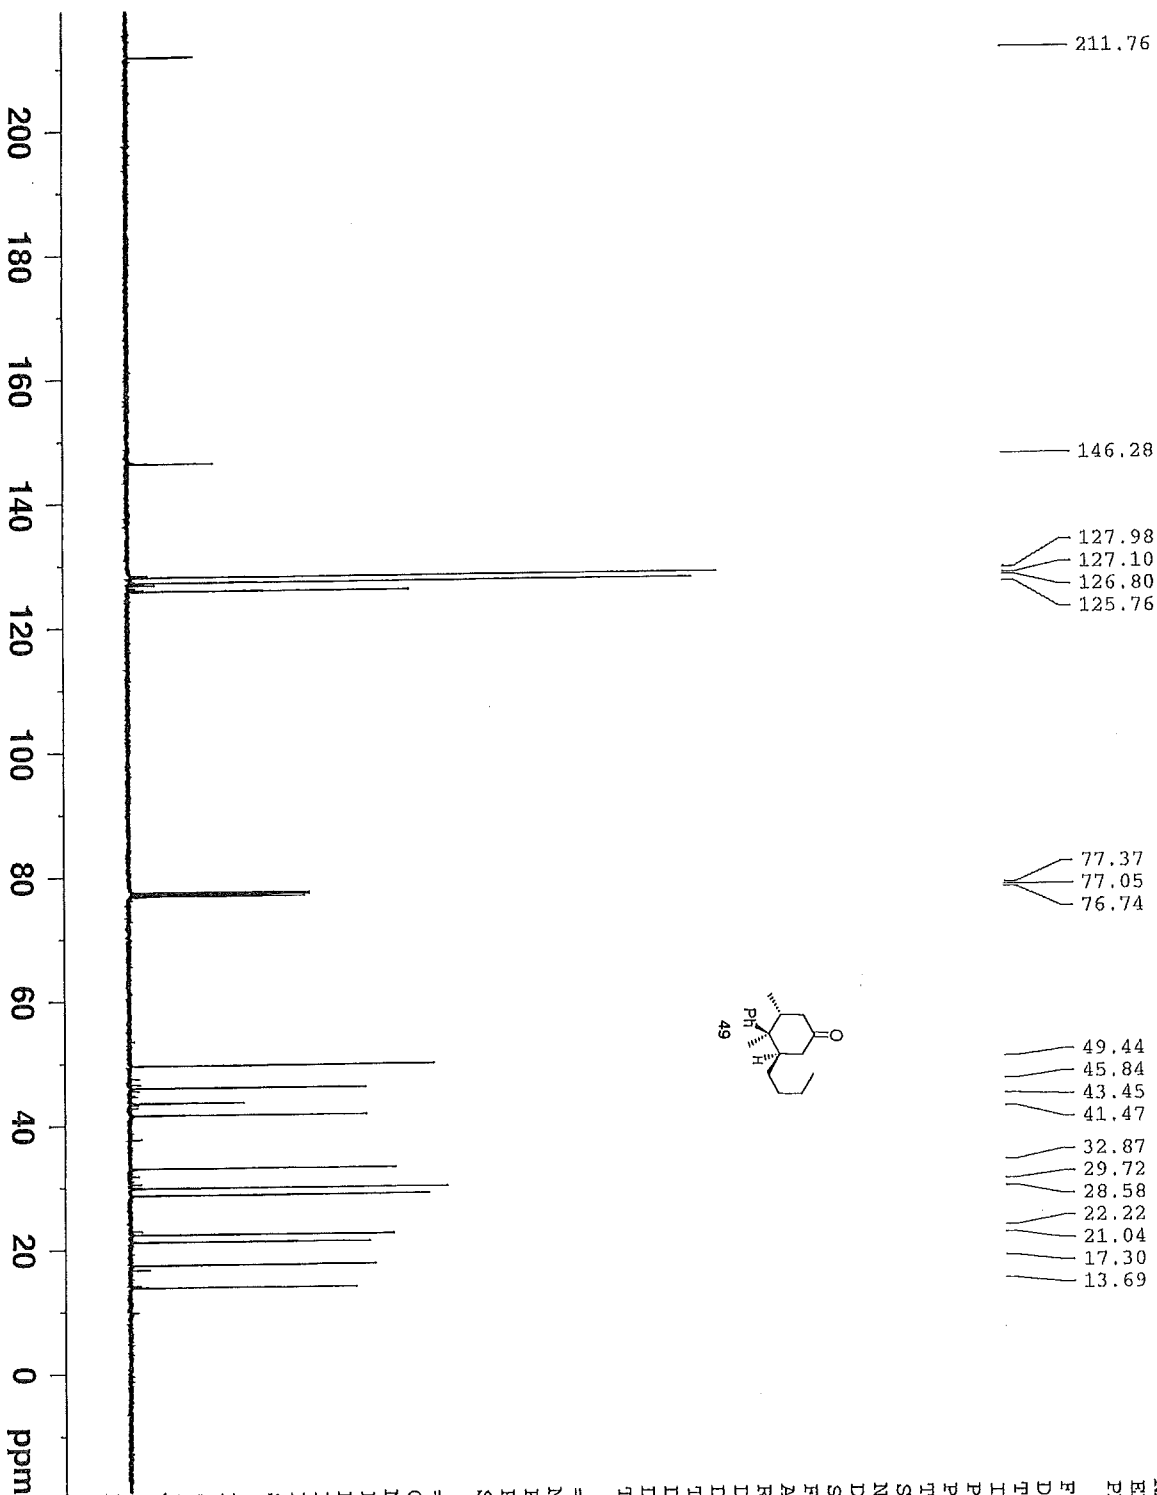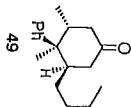

Supplement: c2ob25400j_2.pdf [file c2ob25400j_2.pdf]
